# Supplementary material for: Stereodivergent synthesis via iridium-catalyzed asymmetric double allylic alkylation of cyanoacetate
Source: PubMed Central journal article supplement — Chem Sci. 2021 Nov 20;12(48):15882–91. doi: 10.1039/d1sc06115a (PMC8672708; doi:10.1039/d1sc06115a), 2021-11-20
Supplement: SC-012-D1SC06115A-s001.pdf [file SC-012-D1SC06115A-s001.pdf]

# Stereodivergent Synthesis via Iridium-Catalyzed Asymmetric Double Allylic Alkylation of Cyanoacetate

Chong Shen,<sup>a</sup> Xiang Cheng,<sup>a</sup> Liang Wei,<sup>a</sup> Ruo-Qing Wang,<sup>a</sup> and Chun-Jiang Wang<sup>a,b,\*</sup>

<sup>a</sup>Engineering Research Center of Organosilicon Compounds & Materials, Ministry of Education, College of Chemistry and Molecular Sciences, Wuhan University, China 430072, <sup>b</sup>State Key Laboratory of Organometallic Chemistry, Shanghai Institute of Organic Chemistry, Shanghai, China 230021

E-mail: cjwang@whu.edu.cn

## Supporting Information

### Table of Contents

|       |                                                                                                                                                                   |           |
|-------|-------------------------------------------------------------------------------------------------------------------------------------------------------------------|-----------|
| I.    | General Remarks.....                                                                                                                                              | S2        |
| II.   | General Procedure for Synthesis of Gem-Allylic Cyanoacetates.....                                                                                                 | S2-S14    |
| III.  | Preliminary Investigate Synthesis of Bisallylated Cyanoacetates Bearing Continues Three Stereocenters with Two Different Allyl Carbonates.....                    | S14-S15   |
| IV.   | General Procedure for Synthesis of Monoallylated Cyanoacetates and Krapcho Decarboxylation.....                                                                   | S15-S19   |
| V.    | Optimization of the Asymmetric Double Allylation Reaction Conditions.....                                                                                         | S19-S20   |
| VI.   | Stereodivergent Synthesis of Bisallylated Cyanoacetates Bearing Continues Three Stereocenters.....                                                                | S21-S29   |
| VII.  | Synthesis of ( <i>S,S,R</i> )- <b>7d</b> .....                                                                                                                    | S30-S31   |
| VIII. | Gram Scales and Synthetic Transformations.....                                                                                                                    | S31-S35   |
| IX.   | References.....                                                                                                                                                   | S35       |
| X.    | NMR and HPLC Spectra.....                                                                                                                                         | S36-S139  |
| XI.   | X-ray Structures of ( <i>S,S</i> )- <b>7j</b> , ( <i>S,R,S</i> )- <b>8A</b> , <i>meso</i> -( <i>S,S,R</i> )- <b>7d</b> , and ( <i>3S,4S,5R</i> )- <b>12</b> ..... | S140-S141 |

## I. General Remarks

$^1\text{H}$  NMR spectra were recorded on a Bruker 400 MHz spectrometer in  $\text{CDCl}_3$ . Chemical shifts are reported in ppm with the internal TMS signal at 0.0 ppm as a standard.  $^{13}\text{C}$  NMR spectra were recorded on a Bruker 100 MHz spectrometer in  $\text{CDCl}_3$ . Chemical shifts are reported in ppm with the internal chloroform signal at 77.0 ppm as a standard.  $^{19}\text{F}$  NMR spectra were recorded on a Bruker 376 MHz spectrometer in  $\text{CDCl}_3$ . Chemical shifts are reported in ppm with the internal  $\text{CF}_3\text{COOH}$  signal at -76.55 ppm. The data are reported as (s = single, d = double, t = triple, q = quarter, m = multiple or unresolved, br s = broad single, coupling constant(s) in Hz, integration). Commercially obtained reagents were used without further purification. Solvents were purified prior to use according to the standard methods. Unless otherwise noted, all reactions were carried out under nitrogen atmosphere. The enantiomeric excesses (ee) of the products were determined by high-performance liquid chromatography (HPLC) analysis performed on Agilent 1200 Series chromatographs using a Diacel chiral column (25 cm). Optical rotations were measured on an Rudolph Research Analytical Autopol VI polarimeter with  $[\alpha]_D$  values reported in degrees; concentration (c) is in g/100 mL. All reactions were reacted under  $\text{Ar}_2$  atmosphere. Allylic carbonates **2** were prepared according to the literature procedure.<sup>1</sup> Chiral ligands ( $R_a,R,R$ )-**SL1** (**L2**) and ( $R_a,R,R$ )-**SL7** (**L3**) were prepared according to the literature procedure.<sup>2</sup> The absolute configuration of ( $S,S$ )-**7j**, ( $S,R,S$ )-**8A**, *meso*-( $S,s,R$ )-**7d**, and ( $3S,4S,5R$ )-( $S$ )-**12** were determined by X-ray analysis.

## II. General Procedure for Synthesis of Gem-Allylic Cyanoacetates

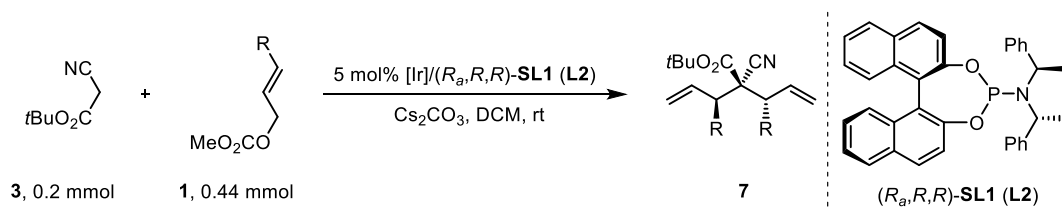

A flame dried Schlenk tube was cooled to rt and evacuated and backfilled with argon for three times. To this Schlenk tube were added  $[\text{Ir}(\text{COD})\text{Cl}]_2$  (0.005 mmol, 2.5 mol %), phosphoramidite ligand ( $R_a,R,R$ )-**SL1** (**L2**) (0.01 mmol, 5 mol %), degassed THF (0.5 mL) and degassed *n*-propylamine (0.5

mL). The reaction mixture was heated at 50 °C for 30 min and then the volatile solvents were removed under vacuum to give a pale yellow solid. allylic carbonates (0.44 mmol), Cyanoacetates (0.20 mmol), Cs<sub>2</sub>CO<sub>3</sub> (0.40 mmol), DCM (2 mL) were then added, reacted at room temperature. Once starting material was consumed (monitored by TLC), the mixture was added water, and extracted with dichloromethane (3×). The dichloromethane layers were dried over anhydrous Na<sub>2</sub>SO<sub>4</sub>, filtered, and evaporated to give crude **7**, and dr was determined by crude <sup>1</sup>H NMR. The crude product was purified by silica-gel column chromatography to give **7**.

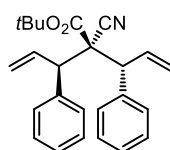

**7a**

**tert-butyl (R)-2-cyano-3-phenyl-2-((R)-1-phenylallyl)pent-4-enoate (7a):** Yield (97%); white solid, mp 92–94 °C;  $[\alpha]_D^{25} = -108.66$  (*c* 1.64, CH<sub>2</sub>Cl<sub>2</sub>); <sup>1</sup>H NMR (400 MHz, Chloroform-*d*) δ 7.44 – 7.40 (m, 2H), 7.35 – 7.26 (m, 7H), 7.25 – 7.21 (m, 1H), 6.64 (ddd, *J* = 17.0, 10.1 Hz, 9.9 Hz, 1H), 6.20 (ddd, *J* = 16.9, 10.2, 9.3 Hz, 1H), 5.31 (dd, *J* = 10.2, 1.6 Hz, 1H), 5.22 (dd, *J* = 17.0, 1.4 Hz, 1H), 5.20 (dd, *J* = 10.1, 1.6 Hz, 1H), 5.13 (dd, *J* = 16.9, 1.4 Hz, 1H), 3.91 (d, *J* = 9.3 Hz, 1H), 3.83 (d, *J* = 9.9 Hz, 1H), 0.99 (s, 9H). <sup>13</sup>C NMR (101 MHz, Chloroform-*d*) δ 165.4, 138.8, 138.4, 134.6, 134.3, 129.09, 129.06, 128.49, 128.45, 127.9, 127.6, 119.7, 119.6, 118.5, 84.0, 58.6, 55.3, 53.4, 27.2.; HRMS (ESI+) Calcd. For C<sub>25</sub>H<sub>27</sub>NNaO<sub>2</sub><sup>+</sup> ([M+Na]<sup>+</sup>): 396.1934, found: 396.1923. >20:1 dr. The product was analyzed by HPLC to determine the enantiomeric excess: >99% ee (Chiralpak IE, *i*-propanol/hexane = 2/98, flow rate 1.0 mL/min, λ = 220 nm); *t<sub>r</sub>* = 5.78 and 6.61 min.

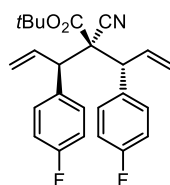

**7b**

**tert-butyl (R)-2-cyano-3-(4-fluorophenyl)-2-((R)-1-(4-fluorophenyl)allyl)pent-4-enoate (7b):** Yield (97%); pale yellow solid, mp 54–56 °C;  $[\alpha]_D^{25} = -87.68$  (*c* 1.25, CH<sub>2</sub>Cl<sub>2</sub>); <sup>1</sup>H NMR (400 MHz, Chloroform-*d*) δ 7.42 – 7.36 (m, 2H), 7.32 – 7.27 (m, 2H), 7.04 – 6.94 (m, 4H), 6.59 (ddd, *J* = 17.2, 10.0,

10.0 Hz, 1H), 6.17 (ddd,  $J = 17.2, 10.2, 9.2$  Hz, 1H), 5.32 (dd,  $J = 10.0, 1.2$  Hz, 1H), 5.23 (dd,  $J = 10.4, 1.2$  Hz, 1H), 5.20 (dd,  $J = 17.2, 1.0$  Hz, 1H), 5.13 (dd,  $J = 17.2, 1.0$  Hz, 1H), 3.90 (d,  $J = 9.2$  Hz, 1H), 3.81 (d,  $J = 10.0$  Hz, 1H), 1.03 (s, 9H).  $^{13}\text{C}$  NMR (101 MHz, Chloroform- $d$ )  $\delta$  165.3, 162.3 (d,  $J = 246$  Hz), 162.2 (d,  $J = 245$  Hz), 134.5 (d,  $J = 3$  Hz), 134.14, 134.10 (d,  $J = 3$  Hz), 133.8, 130.7 (d,  $J = 7$  Hz), 130.6 (d,  $J = 8$  Hz), 120.0, 119.9, 118.2, 115.4 (d,  $J = 21$  Hz), 115.3 (d,  $J = 22$  Hz), 84.3, 58.7, 54.3, 52.5, 27.2.;  $^{19}\text{F}$  NMR (376 MHz, Chloroform- $d$ )  $\delta$  -114.16 – -114.39 (m), -114.46 – -114.71 (m). HRMS (APCI+) Calcd. For  $\text{C}_{25}\text{H}_{26}\text{F}_2\text{NO}_2^+$  ( $[\text{M}+\text{H}]^+$ ): 410.1926, found: 410.1922. >20:1 dr. The product was analyzed by HPLC to determine the enantiomeric excess: >99% ee (Chiralpak IE, *i*-propanol/hexane = 2/98, flow rate 1.0 mL/min,  $\lambda = 220$  nm);  $t_r = 5.28$  and 5.72 min.

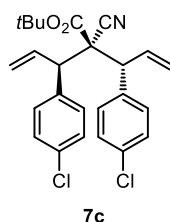

***tert*-butyl (*R*)-3-(4-chlorophenyl)-2-((*R*)-1-(4-chlorophenyl)allyl)-2-cyanopent-4-enoate (7c):** Yield (96%); white solid, mp 58–60 °C;  $[\alpha]_D^{25} = -120.96$  ( $c$  1.46,  $\text{CH}_2\text{Cl}_2$ );  $^1\text{H}$  NMR (400 MHz, Chloroform- $d$ )  $\delta$  7.37 – 7.33 (m, 2H), 7.32 – 7.26 (m, 5H), 7.26 – 7.24 (m, 1H), 6.56 (ddd,  $J = 17.0, 10.0$  Hz, 10.0 Hz, 1H), 6.15 (ddd,  $J = 16.9, 10.2, 9.4$  Hz, 1H), 5.33 (dd,  $J = 10.2, 1.5$  Hz, 1H), 5.24 (dd,  $J = 10.2, 1.5$  Hz, 1H), 5.21 (dd,  $J = 16.9, 1.2$  Hz, 1H), 5.14 (dd,  $J = 16.9, 1.2$  Hz, 1H), 3.88 (d,  $J = 9.4$  Hz, 1H), 3.79 (d,  $J = 10.0$  Hz, 1H), 1.04 (s, 9H).  $^{13}\text{C}$  NMR (101 MHz, Chloroform- $d$ )  $\delta$  165.1, 137.1, 136.7, 133.9, 133.7, 133.5, 130.4, 130.4, 128.7, 128.6, 120.28, 120.25, 118.1, 84.6, 58.3, 54.5, 52.6, 27.2.; HRMS (ESI+) Calcd. For  $\text{C}_{25}\text{H}_{25}\text{NNaO}_2^+$  ( $[\text{M}+\text{Na}]^+$ ): 464.1155, found: 464.1133. >20:1 dr. The product was analyzed by HPLC to determine the enantiomeric excess: 98% ee (Chiralpak ID, *i*-propanol/hexane = 2/98, flow rate 1.0 mL/min,  $\lambda = 220$  nm);  $t_r = 4.95$  and 5.94 min.

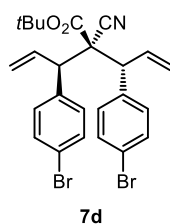

***tert*-butyl (*R*)-3-(4-bromophenyl)-2-((*R*)-1-(4-bromophenyl)allyl)-2-cyanopent-4-enoate (**7d**):** Yield (99%); white solid, mp 98–100 °C;  $[\alpha]_D^{25} = -114.83$  (*c* 1.51, CH<sub>2</sub>Cl<sub>2</sub>); <sup>1</sup>H NMR (400 MHz, Chloroform-*d*) δ 7.46 – 7.40 (m, 4H), 7.31 – 7.26 (m, 2H), 7.22 – 7.17 (m, 2H), 6.56 (ddd, *J* = 17.0, 10.0 Hz, 10.0 Hz, 1H), 6.15 (ddd, *J* = 16.9, 10.2, 9.3 Hz, 1H), 5.32 (dd, *J* = 10.1, 1.5 Hz, 1H), 5.24 (dd, *J* = 10.1, 1.2 Hz, 1H), 5.20 (dd, *J* = 16.9, 1.0 Hz, 1H), 5.14 (dd, *J* = 16.9, 1.0 Hz, 1H), 3.87 (d, *J* = 9.3 Hz, 1H), 3.77 (d, *J* = 10.0 Hz, 1H), 1.04 (s, 9H). <sup>13</sup>C NMR (101 MHz, Chloroform-*d*) δ 165.1, 137.6, 137.2, 133.8, 133.5, 131.7, 131.6, 130.8, 130.7, 122.0, 121.8, 120.4, 120.3, 118.1, 84.6, 58.2, 54.6, 52.7, 27.3.; HRMS (APCI+) Calcd. For C<sub>25</sub>H<sub>26</sub>Br<sub>2</sub>NO<sub>2</sub><sup>+</sup> ([M+H]<sup>+</sup>): 530.0325, found: 530.0337. >20:1 dr. The product was analyzed by HPLC to determine the enantiomeric excess: >99% ee (Chiralpak IE, *i*-propanol/hexane = 2/98, flow rate 1.0 mL/min, λ = 220 nm); t<sub>r</sub> = 6.021 and 7.65 min.

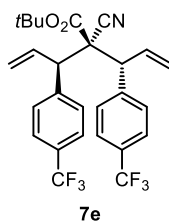

***tert*-butyl (*R*)-2-cyano-3-(4-(trifluoromethyl)phenyl)-2-((*R*)-1-(4-(trifluoromethyl)phenyl)allyl)pent-4-enoate (**7e**):** Yield (91%); pale yellow solid, mp 59–61 °C;  $[\alpha]_D^{25} = -88.82$  (*c* 0.93, CH<sub>2</sub>Cl<sub>2</sub>); <sup>1</sup>H NMR (400 MHz, Chloroform-*d*) δ 7.61 – 7.54 (m, 6H), 7.46 (d, *J* = 8.2 Hz, 2H), 6.61 (ddd, *J* = 17.0, 10.0 Hz, 10.0 Hz, 1H), 6.19 (ddd, *J* = 16.9, 10.2, 9.4 Hz, 1H), 5.38 (dd, *J* = 10.2, 1.4 Hz, 1H), 5.262 (dd, *J* = 10.2, 1.4 Hz, 1H), 5.257 (dd, *J* = 16.9, 1.0 Hz, 1H), 5.17 (dd, *J* = 16.9, 1.0 Hz, 1H), 3.99 (d, *J* = 9.4 Hz, 1H), 3.90 (d, *J* = 10.0 Hz, 1H), 0.99 (s, 9H). <sup>13</sup>C NMR (101 MHz, Chloroform-*d*) δ 164.9, 142.5, 142.1, 133.3, 133.1, 130.3 (q, *J* = 32 Hz), 130.1 (q, *J* = 34 Hz), 129.51, 129.49, 125.5 (q, *J* = 4 Hz), 125.4 (q, *J* = 4 Hz), 123.93 (q, *J* = 271 Hz), 123.90 (q, *J* = 271 Hz), 121.0, 120.8, 117.9, 84.9, 58.0, 54.9, 53.1, 27.1.; <sup>19</sup>F NMR (376 MHz, Chloroform-*d*) δ -62.67, -62.77. HRMS (APCI+) Calcd. For C<sub>27</sub>H<sub>26</sub>F<sub>6</sub>NO<sub>2</sub><sup>+</sup> ([M+H]<sup>+</sup>): 510.1862, found: 510.1875. >20:1 dr. The product was analyzed by HPLC to determine the enantiomeric excess: >99% ee (Chiralpak IE, *i*-propanol/hexane = 2/98, flow rate 1.0 mL/min, λ = 220 nm); t<sub>r</sub> = 4.14 and 4.71 min.

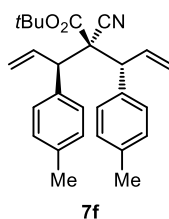

**tert-butyl (R)-2-cyano-3-(p-tolyl)-2-((R)-1-(p-tolyl)allyl)pent-4-enoate (7f):** Yield (99%); pale yellow syrupy liquid;  $[\alpha]_D^{25} = -118.70$  (*c* 0.58, CH<sub>2</sub>Cl<sub>2</sub>); <sup>1</sup>H NMR (400 MHz, Chloroform-*d*)  $\delta$  7.31 – 7.27 (m, 2H), 7.22 – 7.18 (m, 2H), 7.13 – 7.06 (m, 4H), 6.60 (ddd, *J* = 17.0, 10.0 Hz, 10.0 Hz, 1H), 6.19 (ddd, *J* = 16.9, 10.2, 9.4 Hz, 1H), 5.28 (dd, *J* = 10.2, 1.6 Hz, 1H), 5.19 (dd, *J* = 17.0, 1.5 Hz, 1H), 5.18 (dd, *J* = 10.0, 1.6 Hz, 1H), 5.12 (dd, *J* = 16.9, 1.5, 1H), 3.87 (d, *J* = 9.4 Hz, 1H), 3.77 (d, *J* = 10.0 Hz, 1H), 2.32 (s, 3H), 2.29 (s, 3H), 1.02 (s, 9H). <sup>13</sup>C NMR (101 MHz, Chloroform-*d*)  $\delta$  165.5, 137.5, 137.2, 135.8, 135.5, 134.9, 134.6, 129.2, 129.0, 128.92, 128.85, 119.33, 119.28, 118.6, 83.8, 58.7, 55.0, 53.0, 27.2, 21.1, 21.0.; HRMS (ESI+) Calcd. For C<sub>27</sub>H<sub>31</sub>NNaO<sub>2</sub><sup>+</sup> ([M+Na]<sup>+</sup>): 424.2247, found: 424.2238. >20:1 dr. The product was analyzed by HPLC to determine the enantiomeric excess: >99% ee (Chiralpak IE, *i*-propanol/hexane = 2/98, flow rate 1.0 mL/min,  $\lambda$  = 220 nm); *t<sub>r</sub>* = 6.59 and 12.39 min.

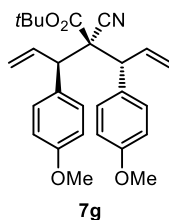

**tert-butyl (R)-2-cyano-3-(4-methoxyphenyl)-2-((R)-1-(4-methoxyphenyl)allyl)pent-4-enoate (7g):** Yield (81%); pale yellow syrupy liquid;  $[\alpha]_D^{25} = -126.00$  (*c* 0.55, CH<sub>2</sub>Cl<sub>2</sub>); <sup>1</sup>H NMR (400 MHz, Chloroform-*d*)  $\delta$  7.36 – 7.29 (m, 2H), 7.26 – 7.21 (m, 2H), 6.86 – 6.80 (m, 4H), 6.59 (ddd, *J* = 17.0, 10.1, 10.0 Hz, 1H), 6.18 (ddd, *J* = 16.9, 10.2, 9.3 Hz, 1H), 5.28 (dd, *J* = 10.2, 1.7 Hz, 1H), 5.19 (dd, *J* = 10.1, 1.5 Hz, 1H), 5.18 (dd, *J* = 17.0, 1.7 Hz, 1H), 5.11 (d, *J* = 16.9, 1.7 Hz, 1H), 3.86 (d, *J* = 9.3 Hz, 1H), 3.79 (s, 3H), 3.78 (d, *J* = 10.0 Hz, 1H), 3.76 (s, 3H), 1.04 (s, 9H). <sup>13</sup>C NMR (101 MHz, Chloroform-*d*)  $\delta$  165.6, 159.1, 159.0, 134.8, 134.5, 131.0, 130.6, 130.1, 130.0, 119.19, 119.16, 118.7, 113.83, 113.77, 83.8, 59.1, 55.3, 55.2, 54.4, 52.6, 27.3.; HRMS (ESI+) Calcd. For C<sub>27</sub>H<sub>31</sub>NNaO<sub>4</sub><sup>+</sup> ([M+Na]<sup>+</sup>): 456.2145, found: 456.2135. 18:1 dr. The product was analyzed by HPLC to determine the enantiomeric excess: 99% ee (Chiralpak IE, *i*-propanol/hexane = 10/90, flow rate 1.0 mL/min,  $\lambda$  = 238 nm); *t<sub>r</sub>* = 7.48 and

10.19 min.

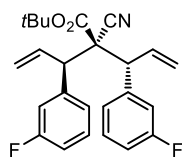

7h

**tert-butyl (R)-2-cyano-3-(3-fluorophenyl)-2-((R)-1-(3-fluorophenyl)allyl)pent-4-enoate (7h):** Yield (95%); pale yellow syrupy liquid;  $[\alpha]_D^{25} = -94.44$  (*c* 0.72, CH<sub>2</sub>Cl<sub>2</sub>); <sup>1</sup>H NMR (400 MHz, Chloroform-*d*)  $\delta$  7.33 – 7.28 (m, 1H), 7.26 – 7.24 (m, 1H), 7.21 (dt, *J* = 7.7, 1.5 Hz, 1H), 7.16 – 7.11 (m, 2H), 7.04 – 6.92 (m, 3H), 6.57 (ddd, *J* = 17.0, 10.0, 9.9 Hz, 1H), 6.17 (ddd, *J* = 16.9, 10.2, 9.4 Hz, 1H), 5.35 (dd, *J* = 10.0, 1.5 Hz, 1H), 5.25 (dd, *J* = 10.2, 1.5 Hz, 1H), 5.23 (dd, *J* = 17.0, 1.5 Hz, 1H), 5.16 (dd, *J* = 16.9, 1.5 Hz, 1H), 3.90 (d, *J* = 9.4 Hz, 1H), 3.81 (d, *J* = 9.9 Hz, 1H), 1.05 (s, 9H). <sup>13</sup>C NMR (101 MHz, Chloroform-*d*)  $\delta$  165.1, 162.62 (d, *J* = 245 Hz), 162.55 (d, *J* = 245 Hz), 140.9 (d, *J* = 7 Hz), 140.5 (d, *J* = 7 Hz), 133.7, 133.4, 130.1 (d, *J* = 9 Hz), 130.0 (d, *J* = 8 Hz), 125.0 (d, *J* = 3 Hz), 124.7 (d, *J* = 3 Hz), 120.4, 120.3, 118.0, 116.2 (d, *J* = 34 Hz), 115.9 (d, *J* = 34 Hz), 114.9 (d, *J* = 21 Hz), 114. (d, *J* = 29 Hz), 114.6 (d, *J* = 29 Hz), 84.6, 58.2, 54.8 (d, *J* = 2 Hz), 52.9 (d, *J* = 2 Hz), 27.2.; <sup>19</sup>F NMR (376 MHz, Chloroform-*d*)  $\delta$  -112.48 – -112.59 (m), -112.59 – -112.68 (m). HRMS (ESI+) Calcd. For C<sub>25</sub>H<sub>25</sub>F<sub>2</sub>NNaO<sub>2</sub><sup>+</sup> ([M+Na]<sup>+</sup>): 432.1746, found: 432.1740. 20:1 dr. The product was analyzed by HPLC to determine the enantiomeric excess: 99% ee (Chiralpak IE, *i*-propanol/hexane = 1/99, flow rate 1.0 mL/min,  $\lambda$  = 238 nm); *t*<sub>r</sub> = 6.60 and 8.11 min.

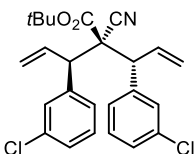

7i

**tert-butyl (R)-3-(3-chlorophenyl)-2-((R)-1-(3-chlorophenyl)allyl)-2-cyanopent-4-enoate (7i):** Yield (86%); pale yellow solid, mp 78–80 °C;  $[\alpha]_D^{25} = -90.81$  (*c* 0.74, CH<sub>2</sub>Cl<sub>2</sub>); <sup>1</sup>H NMR (400 MHz, Chloroform-*d*)  $\delta$  7.36 (dt, *J* = 5.4, 2.1 Hz, 2H), 7.29 – 7.26 (m, 3H), 7.26 – 7.22 (m, 3H), 6.57 (ddd, *J* = 17.0, 10.3, 10.0 Hz, 1H), 6.17 (ddd, *J* = 16.9, 10.2, 9.5 Hz, 1H), 5.35 (dd, *J* = 10.2, 1.5 Hz, 1H), 5.27 (dd, *J* = 10.3, 1.3 Hz, 1H), 5.22 (dd, *J* = 17.0, 1.5 Hz, 1H), 5.17 (dd, *J* = 16.9, 1.3 Hz, 1H), 3.88 (d, *J* = 9.5

Hz, 1H), 3.78 (d,  $J = 10.0$  Hz, 1H), 1.07 (s, 9H).  $^{13}\text{C}$  NMR (101 MHz, Chloroform- $d$ )  $\delta$  165.0, 140.5, 140.1, 134.3, 134.2, 133.7, 133.4, 129.9, 129.8, 129.5, 128.8, 128.1, 127.8, 127.6, 127.0, 120.5, 117.8, 84.8, 58.2, 54.8, 52.9, 27.3.; HRMS (ESI+) Calcd. For  $\text{C}_{25}\text{H}_{25}\text{Cl}_2\text{NNaO}_2^+$  ( $[\text{M}+\text{Na}]^+$ ): 464.1155, found: 464.1156. 17:1 dr. The product was analyzed by HPLC to determine the enantiomeric excess: >99% ee (Chiralpak IE, *i*-propanol/hexane = 1/99, flow rate 1.0 mL/min,  $\lambda = 220$  nm);  $t_r = 5.98$  and 7.84 min.

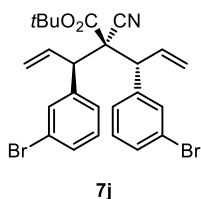

**tert-butyl (R)-3-(3-bromophenyl)-2-((R)-1-(3-bromophenyl)allyl)-2-cyanopent-4-enoate (7j):** Yield (88%); pale yellow solid, mp 108–110 °C;  $[\alpha]_D^{25} = -82.36$  ( $c$  1.27,  $\text{CH}_2\text{Cl}_2$ );  $^1\text{H}$  NMR (400 MHz, Chloroform- $d$ )  $\delta$  7.50 (t,  $J = 1.9$  Hz, 1H), 7.44 – 7.37 (m, 4H), 7.30 (dt,  $J = 7.8, 1.4$  Hz, 1H), 7.19 (dt,  $J = 11.0, 7.8$  Hz, 2H), 6.56 (ddd,  $J = 17.0, 10.2, 10.0$  Hz, 1H), 6.17 (ddd,  $J = 16.8, 10.1, 9.5$  Hz, 1H), 5.34 (dd,  $J = 10.2, 1.5$  Hz, 1H), 5.27 (dd,  $J = 10.1, 1.4$  Hz, 1H), 5.22 (dd,  $J = 16.9, 1.4$  Hz, 1H), 5.17 (dd,  $J = 16.9, 1.0$  Hz, 1H), 3.86 (d,  $J = 9.5$  Hz, 1H), 3.76 (d,  $J = 10.0$  Hz, 1H), 1.08 (s, 9H).  $^{13}\text{C}$  NMR (101 MHz, Chloroform- $d$ )  $\delta$  165.0, 140.8, 140.4, 133.6, 133.3, 132.3, 131.7, 131.1, 130.8, 130.1, 130.1, 128.0, 127.4, 122.6, 122.4, 120.6, 120.5, 117.8, 84.9, 58.2, 54.8, 52.8, 27.3.; HRMS (APCI+) Calcd. For  $\text{C}_{25}\text{H}_{26}\text{Br}_2\text{NO}_2^+$  ( $[\text{M}+\text{H}]^+$ ): 530.0325, found: 530.0313. 18:1 dr. The product was analyzed by HPLC to determine the enantiomeric excess: >99% ee (Chiralpak IE, *i*-propanol/hexane = 1/99, flow rate 1.0 mL/min,  $\lambda = 220$  nm);  $t_r = 6.99$  and 8.55 min.

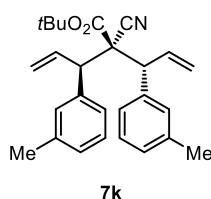

**tert-butyl (R)-2-cyano-3-(*m*-tolyl)-2-((R)-1-(*m*-tolyl)allyl)pent-4-enoate (7k):** Yield (93%); white solid, mp 82–84 °C;  $[\alpha]_D^{25} = -96.06$  ( $c$  0.66,  $\text{CH}_2\text{Cl}_2$ );  $^1\text{H}$  NMR (400 MHz, Chloroform- $d$ )  $\delta$  7.26 (d,  $J = 8.1$  Hz, 1H), 7.22 – 7.16 (m, 3H), 7.15 – 7.10 (m, 2H), 7.08 (dd,  $J = 7.5, 1.3$  Hz, 1H), 7.05 – 7.01 (m, 1H), 6.63 (ddd,  $J = 16.9, 10.1, 9.9$  Hz, 1H), 6.21 (ddd,  $J = 16.9, 10.2, 9.4$  Hz, 1H), 5.29 (dd,  $J = 10.1, 1.7$



Hz, 1H), 5.201 (dd,  $J = 10.1, 1.5$  Hz, 1H), 5.198 (dd,  $J = 16.9, 1.7$  Hz, 1H), 5.13 (dd,  $J = 16.9, 1.5$  Hz, 1H), 3.87 (d,  $J = 9.4$  Hz, 1H), 3.77 (d,  $J = 9.9$  Hz, 1H), 2.32 (s, 3H), 2.30 (s, 3H), 1.01 (s, 9H).  $^{13}\text{C}$  NMR (101 MHz, Chloroform- $d$ )  $\delta$  165.5, 138.7, 138.3, 138.0, 137.9, 134.8, 134.5, 129.9, 129.6, 128.6, 128.38, 128.36, 128.2, 126.1, 125.9, 119.44, 119.39, 118.4, 83.8, 58.5, 55.3, 53.4, 27.2, 21.4, 21.3.; HRMS (ESI+) Calcd. For  $\text{C}_{27}\text{H}_{31}\text{NNaO}_2^+$  ( $[\text{M}+\text{Na}]^+$ ): 424.2247, found: 424.2238. >20:1 dr. The product was analyzed by HPLC to determine the enantiomeric excess: >99% ee (Chiralpak IE, *i*-propanol/hexane = 1/99, flow rate 1.0 mL/min,  $\lambda = 220$  nm);  $t_r = 6.58$  and 8.90 min.

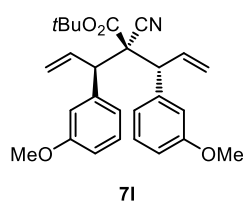

**tert-butyl (R)-2-cyano-3-(3-methoxyphenyl)-2-((R)-1-(3-methoxyphenyl)allyl)pent-4-enoate (7l):**

Yield (92%); white solid, mp 103–105 °C;  $[\alpha]_D^{25} = -99.07$  ( $c$  0.75,  $\text{CH}_2\text{Cl}_2$ );  $^1\text{H}$  NMR (400 MHz, Chloroform- $d$ )  $\delta$  7.24 – 7.20 (m, 1H), 7.20 – 7.16 (m, 1H), 7.03 – 6.99 (m, 1H), 6.97 – 6.92 (m, 2H), 6.88 (t,  $J = 2.1$  Hz, 1H), 6.83 – 6.76 (m, 2H), 6.60 (ddd,  $J = 17.0, 10.0, 10.0$  Hz, 1H), 6.18 (ddd,  $J = 16.9, 10.2, 9.3$  Hz, 1H), 5.30 (dd,  $J = 10.0, 1.7$  Hz, 1H), 5.21 (dd,  $J = 16.9, 1.2$  Hz, 1H), 5.19 (dd,  $J = 10.2, 1.2$  Hz, 1H), 5.12 (dd,  $J = 17.0, 1.7$  Hz, 1H), 3.87 (d,  $J = 9.3$  Hz, 1H), 3.81 (d,  $J = 10.0$  Hz, 1H), 3.80 (s, 3H), 3.78 (s, 3H), 1.04 (s, 9H).  $^{13}\text{C}$  NMR (101 MHz, Chloroform- $d$ )  $\delta$  165.4, 159.52, 159.48, 140.2, 139.7, 134.5, 134.3, 129.44, 129.42, 121.34, 121.29, 119.6, 119.5, 115.0, 114.3, 113.6, 113.2, 84.0, 58.4, 55.3, 55.21, 55.19, 53.5, 27.2.; HRMS (ESI+) Calcd. For  $\text{C}_{27}\text{H}_{31}\text{NNaO}_4^+$  ( $[\text{M}+\text{Na}]^+$ ): 456.2145, found: 456.2138. 10:1 dr. The product was analyzed by HPLC to determine the enantiomeric excess: 96% ee (Chiralpak IE, *i*-propanol/hexane = 10/90, flow rate 1.0 mL/min,  $\lambda = 220$  nm);  $t_r = 6.72$  and 9.24 min.

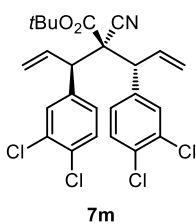

**tert-butyl (R)-2-cyano-3-(3,4-dichlorophenyl)-2-((R)-1-(3,4-dichlorophenyl)allyl)pent-4-enoate (7m):**

Yield (98%); white solid, mp 64–66 °C;  $[\alpha]_D^{25} = -118.04$  ( $c$  0.56,  $\text{CH}_2\text{Cl}_2$ );  $^1\text{H}$  NMR (400 MHz,

Chloroform-*d*)  $\delta$  7.45 (d,  $J = 2.1$  Hz, 1H), 7.43 – 7.38 (m, 2H), 7.36 – 7.29 (m, 2H), 7.20 (dd,  $J = 8.4$ , 2.2 Hz, 1H), 6.52 (ddd,  $J = 17.0$ , 10.0, 9.9 Hz, 1H), 6.14 (ddd,  $J = 16.8$ , 10.2, 9.5 Hz, 1H), 5.36 (dd,  $J = 10.0$ , 1.4 Hz, 1H), 5.30 (dd,  $J = 10.2$ , 1.2 Hz, 1H), 5.22 (dd,  $J = 17.0$ , 1.4 Hz, 1H), 5.30 (dd,  $J = 16.8$ , 1.2 Hz, 1H), 3.86 (d,  $J = 9.5$  Hz, 1H), 3.75 (d,  $J = 9.9$  Hz, 1H), 1.10 (s, 9H).  $^{13}\text{C}$  NMR (101 MHz, Chloroform-*d*)  $\delta$  164.8, 138.5, 138.3, 133.1, 132.8, 132.7, 132.5, 132.2, 132.0, 131.3, 130.6, 130.54, 130.46, 128.6, 128.1, 121.1, 121.0, 117.6, 85.3, 58.0, 54.1, 52.3, 27.3.; HRMS (ESI+) Calcd. For  $\text{C}_{25}\text{H}_{23}\text{Cl}_4\text{NNaO}_2^+$  ( $[\text{M}+\text{Na}]^+$ ): 532.0375, found: 532.0360. >20:1 dr. The product was analyzed by HPLC to determine the enantiomeric excess: >99% ee (Chiralpak IE, *i*-propanol/hexane = 2/98, flow rate 1.0 mL/min,  $\lambda = 220$  nm);  $t_r = 5.07$  and 6.66 min.

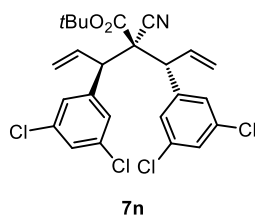

***tert*-butyl (*R*)-2-cyano-3-(3,5-dichlorophenyl)-2-((*R*)-1-(3,5-dichlorophenyl)allyl)pent-4-enoate (7n):** Yield (97%); white solid, mp 88–90 °C;  $[\alpha]_D^{25} = -86.52$  ( $c$  0.69,  $\text{CH}_2\text{Cl}_2$ );  $^1\text{H}$  NMR (400 MHz, Chloroform-*d*)  $\delta$  7.30 (d,  $J = 2.0$  Hz, 3H), 7.27 (t,  $J = 1.9$  Hz, 1H), 7.19 (d,  $J = 1.8$  Hz, 2H), 6.50 (ddd,  $J = 16.9$ , 10.1, 9.9 Hz, 1H), 6.13 (ddd,  $J = 16.9$ , 10.1, 9.6 Hz, 1H), 5.37 (dd,  $J = 10.1$ , 1.3 Hz, 1H), 5.33 (dd,  $J = 10.1$ , 1.1 Hz, 1H), 5.23 (dd,  $J = 16.9$ , 1.3 Hz, 1H), 5.21 (dd,  $J = 16.9$ , 1.1 Hz, 1H), 3.85 (d,  $J = 9.6$  Hz, 1H), 3.72 (d,  $J = 9.9$  Hz, 1H), 1.14 (s, 9H).  $^{13}\text{C}$  NMR (101 MHz, Chloroform-*d*)  $\delta$  164.7, 141.5, 141.2, 135.1, 135.0, 132.9, 132.5, 128.3, 128.0, 127.51, 127.49, 121.4, 121.3, 117.2, 85.5, 57.6, 54.5, 52.5, 27.3.; HRMS (ESI+) Calcd. For  $\text{C}_{25}\text{H}_{23}\text{Cl}_4\text{NNaO}_2^+$  ( $[\text{M}+\text{Na}]^+$ ): 532.0375, found: 532.0368. >20:1 dr. The product was analyzed by HPLC to determine the enantiomeric excess: 99% ee (Chiralpak IE, *i*-propanol/hexane = 2/98, flow rate 1.0 mL/min,  $\lambda = 210$  nm);  $t_r = 5.00$  and 5.86 min.

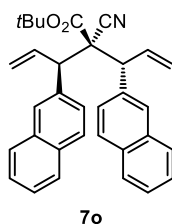

**tert-butyl (R)-2-cyano-3-(naphthalen-2-yl)-2-((R)-1-(naphthalen-2-yl)allyl)pent-4-enoate (7o):** Yield (97%); white solid, mp 116–118 °C;  $[\alpha]_D^{25} = -155.41$  (*c* 0.85, CH<sub>2</sub>Cl<sub>2</sub>); <sup>1</sup>H NMR (400 MHz, Chloroform-*d*) δ 7.85 – 7.76 (m, 8H), 7.61 (dd, *J* = 8.6, 1.8 Hz, 1H), 7.51 – 7.43 (m, 5H), 6.79 (ddd, *J* = 17.0, 10.0 Hz, 10.0 Hz, 1H), 6.35 (ddd, *J* = 16.9, 10.0 Hz, 9.8 Hz, 1H), 5.37 (dd, *J* = 10.2, 1.5 Hz, 1H), 5.29 (dd, *J* = 17.0, 1.5 Hz, 1H), 5.23 (dd, *J* = 10.0, 1.2 Hz, 1H), 5.20 (dd, *J* = 16.9, 1.2 Hz, 1H), 4.17 (d, *J* = 10.0 Hz, 1H), 4.06 (d, *J* = 10.0 Hz, 1H), 0.84 (s, 9H). <sup>13</sup>C NMR (101 MHz, Chloroform-*d*) δ 165.6, 136.1, 135.9, 134.5, 134.4, 133.3, 133.2, 132.9, 132.7, 128.3, 128.23, 128.20, 128.1, 128.0, 127.9, 127.6, 127.5, 126.9, 126.7, 126.2, 126.12, 126.05, 126.0, 120.0, 119.8, 118.5, 84.1, 58.6, 55.5, 53.6, 27.1.; HRMS (ESI+) Calcd. For C<sub>33</sub>H<sub>31</sub>NNaO<sub>2</sub><sup>+</sup> ([M+Na]<sup>+</sup>): 496.2247, found: 496.2242. >20:1 dr. The product was analyzed by HPLC to determine the enantiomeric excess: >99% ee (Chiralpak IE, *i*-propanol/hexane = 2/98, flow rate 1.0 mL/min, λ = 232 nm); t<sub>r</sub> = 10.70 and 21.76 min.

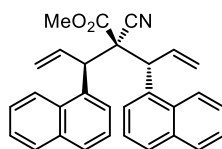

7p

**tert-butyl (R)-2-cyano-3-(naphthalen-1-yl)-2-((R)-1-(naphthalen-1-yl)allyl)pent-4-enoate (7p):** Yield (77%); white solid, mp 80–82 °C;  $[\alpha]_D^{25} = -123.58$  (*c* 0.95, CH<sub>2</sub>Cl<sub>2</sub>); <sup>1</sup>H NMR (400 MHz, Chloroform-*d*) δ 8.41 (d, *J* = 8.7 Hz, 1H), 8.09 (d, *J* = 8.7 Hz, 1H), 7.88 (dt, *J* = 7.9, 1.9 Hz, 2H), 7.85 – 7.76 (m, 2H), 7.75 – 7.64 (m, 2H), 7.62 – 7.51 (m, 3H), 7.49 – 7.37 (m, 4H), 6.64 (ddd, *J* = 16.7, 9.8, 9.5 Hz, 1H), 6.06 (ddd, *J* = 16.9, 10.2, 9.2 Hz, 1H), 5.37 (dd, *J* = 16.7, 1.2 Hz, 1H), 5.36 (dd, *J* = 9.8, 1.2 Hz, 1H), 5.21 (d, *J* = 9.5 Hz, 1H), 5.03 (d, *J* = 9.2 Hz, 1H), 4.83 (dd, *J* = 10.2, 1.2 Hz, 1H), 4.65 (dd, *J* = 16.9, 1.2 Hz, 1H), 3.15 (s, 3H). <sup>13</sup>C NMR (101 MHz, Chloroform-*d*) δ 167.5, 135.5, 135.4, 134.8, 134.3, 134.1, 133.9, 132.3, 130.7, 129.2, 128.9, 128.6, 128.1, 126.6, 126.3, 125.9, 125.8, 125.6, 125.3, 125.2, 125.1, 122.6, 122.4, 119.4, 118.2, 118.1, 59.3, 52.7, 48.5, 46.0.; HRMS (ESI+) Calcd. For C<sub>30</sub>H<sub>25</sub>NNaO<sub>2</sub><sup>+</sup> ([M+Na]<sup>+</sup>): 454.1778, found: 454.1771. >20:1 dr. The product was analyzed by HPLC to determine the enantiomeric excess: 96% ee (Chiralpak IE, *i*-propanol/hexane = 2/98, flow rate 1.0 mL/min, λ = 220 nm); t<sub>r</sub> = 11.46 and 17.56 min.

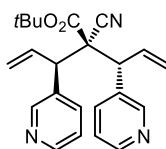

7q

**tert-butyl (R)-2-cyano-3-(pyridin-3-yl)-2-((R)-1-(pyridin-3-yl)allyl)pent-4-enoate (7q):** Yield (33%); pale yellow solid, mp 106–108 °C;  $[\alpha]_D^{25} = -112.50$  (*c* 0.84, CH<sub>2</sub>Cl<sub>2</sub>); <sup>1</sup>H NMR (400 MHz, Chloroform-*d*) δ 8.54 (ddt, *J* = 14.3, 4.8, 2.5 Hz, 4H), 7.88 (ddd, *J* = 8.0, 2.4, 1.6 Hz, 1H), 7.74 – 7.66 (m, 1H), 7.30 – 7.24 (m, 2H), 6.60 (ddd, *J* = 17.0, 10.0, 9.9 Hz, 1H), 6.17 (ddd, *J* = 16.9, 10.2, 9.4 Hz, 1H), 5.40 (dd, *J* = 10.2, 1.4 Hz, 1H), 5.28 (dd, *J* = 17.0, 1.0 Hz, 1H), 5.27 (dd, *J* = 10.0, 1.4 Hz, 1H), 5.18 (dd, *J* = 16.9, 1.0 Hz, 1H), 3.97 (d, *J* = 9.4 Hz, 1H), 3.89 (d, *J* = 9.9 Hz, 1H), 1.04 (s, 9H). <sup>13</sup>C NMR (101 MHz, Chloroform-*d*) δ 164.8, 150.5, 150.2, 149.3, 149.1, 136.4, 135.9, 134.3, 133.9, 133.1, 132.7, 123.4, 123.3, 121.1, 121.0, 117.7, 85.2, 58.3, 52.8, 50.7, 27.2.; HRMS (APCI+) Calcd. For C<sub>23</sub>H<sub>26</sub>N<sub>3</sub>O<sub>2</sub><sup>+</sup> ([M+H]<sup>+</sup>): 376.2020, found: 376.2031. >20:1 dr. The product was analyzed by HPLC to determine the enantiomeric excess: >99% ee (Chiralpak IE, *i*-propanol/hexane = 20/80, flow rate 1.0 mL/min, λ = 220 nm); *t*<sub>r</sub> = 27.78 and 36.47 min.

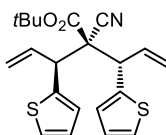

7r

**tert-butyl (R)-2-cyano-3-(naphthalen-1-yl)-2-((R)-1-(naphthalen-1-yl)allyl)pent-4-enoate (7r):** Yield (83%); pale yellow solid, mp 96–98 °C;  $[\alpha]_D^{25} = -97.75$  (*c* 0.71, CH<sub>2</sub>Cl<sub>2</sub>); <sup>1</sup>H NMR (400 MHz, Chloroform-*d*) δ 7.22 (dd, *J* = 5.1, 1.2 Hz, 1H), 7.19 (dd, *J* = 5.1, 1.2 Hz, 1H), 7.14 – 7.10 (m, 2H), 6.97 (dd, *J* = 5.1, 3.6 Hz, 1H), 6.93 (dd, *J* = 5.1, 3.6 Hz, 1H), 6.46 (ddd, *J* = 16.9, 10.0, 9.8 Hz, 1H), 6.15 (ddd, *J* = 16.8, 10.2, 9.2 Hz, 1H), 5.34 (dd, *J* = 10.2, 1.4 Hz, 1H), 5.251 (dd, *J* = 10.0, 1.2 Hz, 1H), 5.246 (dd, *J* = 16.8, 1.4 Hz, 1H), 5.34 (dd, *J* = 16.9, 1.2 Hz, 1H), 4.23 (d, *J* = 9.2 Hz, 1H), 4.16 (d, *J* = 9.8 Hz, 1H), 1.13 (s, 9H). <sup>13</sup>C NMR (101 MHz, Chloroform-*d*) δ 165.0, 140.32, 140.25, 133.9, 133.8, 126.8, 126.6, 126.5, 126.4, 124.9, 124.8, 120.1, 119.7, 118.4, 84.3, 59.6, 50.3, 48.7, 27.3.; HRMS (ESI+) Calcd. For C<sub>21</sub>H<sub>23</sub>NNaO<sub>2</sub>S<sub>2</sub><sup>+</sup> ([M+Na]<sup>+</sup>): 408.1062, found: 408.1056. >20:1 dr. The product was analyzed by HPLC to determine the enantiomeric excess: 96% ee (Chiralpak IE, *i*-propanol/hexane = 1/99, flow rate 1.0

mL/min,  $\lambda = 220$  nm);  $t_r = 9.26$  and 10.42 min.

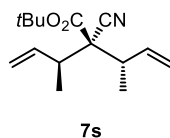

**tert-butyl (S)-2-((S)-but-3-en-2-yl)-2-cyano-3-methylpent-4-enoate (7s):** Yield (87%); pale yellow liquid;  $[\alpha]_D^{25} = -9.03$  ( $c$  1.03,  $\text{CH}_2\text{Cl}_2$ );  $^1\text{H}$  NMR (400 MHz, Chloroform- $d$ )  $\delta$  5.84 (ddd,  $J = 17.2, 11.6, 8.7$  Hz, 1H), 5.82 (ddd,  $J = 17.2, 10.4, 9.0$  Hz, 1H), 5.203 (dd,  $J = 11.6, 1.6$  Hz, 1H), 5.196 (dd,  $J = 17.2, 1.2$  Hz, 1H), 5.12 (dd,  $J = 17.2, 1.6$  Hz, 1H), 5.10 (dd,  $J = 10.4, 1.2$  Hz, 1H), 2.75 (dq,  $J = 9.0, 6.9$  Hz, 1H), 2.75 (dq,  $J = 8.7, 6.8$  Hz, 1H), 1.51 (s, 9H), 1.23 (d,  $J = 6.9$  Hz, 3H), 1.15 (d,  $J = 6.8$  Hz, 3H).  $^{13}\text{C}$  NMR (101 MHz, Chloroform- $d$ )  $\delta$  166.0, 136.7, 136.4, 118.3, 118.2, 117.8, 84.1, 58.4, 42.7, 41.6, 27.9, 17.2, 16.5.; HRMS (ESI+) Calcd. For  $\text{C}_{15}\text{H}_{23}\text{NNaO}_2^+$  ( $[\text{M}+\text{Na}]^+$ ): 272.1621, found: 272.1615. >20:1 dr. The product was transformed to **16** (*vide infra*) and then analyzed by HPLC to determine the enantiomeric excess: 95% ee.

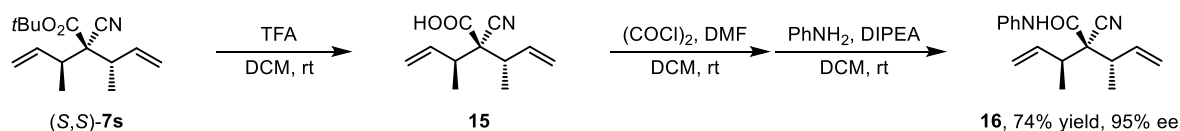

To a solution of (*S,S*)-**7s** (0.20 mmol) in DCM (2.0 mL) was added TFA (1.0 mL) under  $\text{Ar}_2$  at rt and the reaction mixture was stirred for 2 h, then concentrated in vacuo to give crude **11** without purified by flash chromatography. To a solution of crude **15** in DCM (2.0 mL) was added  $(\text{COCl})_2$  (0.80 mmol, 4.0 equiv.) and DMF (20  $\mu\text{L}$ ) under  $\text{Ar}_2$  and the reaction mixture stirred for 1 h, then concentrated in vacuo. After that, DCM (2 mL), diisopropylethylamine (0.40 mmol) and aniline (0.30 mmol) was added under  $\text{Ar}_2$ , the reaction mixture stirred for 8 h at rt. The reaction was quenched with  $\text{H}_2\text{O}$  and extracted with  $\text{CH}_2\text{Cl}_2$  (3 x 3 mL) and the combined organics were washed with 10%  $\text{NaHCO}_3$  (1 x 10 mL), and brine (10 mL). The combined organics were combined and dried over  $\text{Na}_2\text{SO}_4$  and concentrated under vacuum and purified by silica-gel flash chromatography.

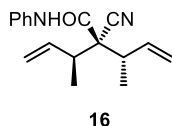

**(*S,Z*)-2-((*S*)-but-3-en-2-yl)-2-cyano-3-methyl-N-phenylpent-4-enimidic acid (16):** Yield (74%); Pale yellow liquid;  $[\alpha]_D^{32} = -16.60$  (*c* 3.56, CH<sub>2</sub>Cl<sub>2</sub>); <sup>1</sup>H NMR (400 MHz, Chloroform-*d*)  $\delta$  7.93 (s, 1H), 7.54 – 7.46 (m, 2H), 7.40 – 7.32 (m, 2H), 7.23 – 7.14 (m, 1H), 5.96 (ddd, *J* = 17.5, 9.9, 8.6 Hz, 1H), 5.84 (ddd, *J* = 17.1, 10.3, 8.7 Hz, 1H), 5.33 – 5.21 (m, 2H), 5.20 – 5.10 (m, 2H), 3.01 – 2.82 (m, 2H), 1.28 (d, *J* = 7.0 Hz, 3H), 1.21 (d, *J* = 6.8 Hz, 3H). <sup>13</sup>C NMR (101 MHz, Chloroform-*d*)  $\delta$  163.6, 136.7, 136.5, 136.4, 129.1, 125.5, 120.7, 112.0, 118.7, 118.0, 58.7, 42.4, 41.9, 17.0, 16.4.; HRMS (ESI+) Calcd. For C<sub>17</sub>H<sub>21</sub>N<sub>2</sub>O ([M+H]<sup>+</sup>): 269.1648, found: 269.1646. The product was analyzed by HPLC to determine the enantiomeric excess: 95% ee (Chiralcel OJ-H, *i*-propanol/hexane = 2/98, flow rate 1.0 mL/min,  $\lambda$  = 240 nm); *t<sub>r</sub>* = 8.45 and 9.51 min.

### III. Preliminary Investigate Synthesis of Bisallylated Cyanoacetates Bearing Continues Three Stereocenters with Two Different Allylic Carbonates.

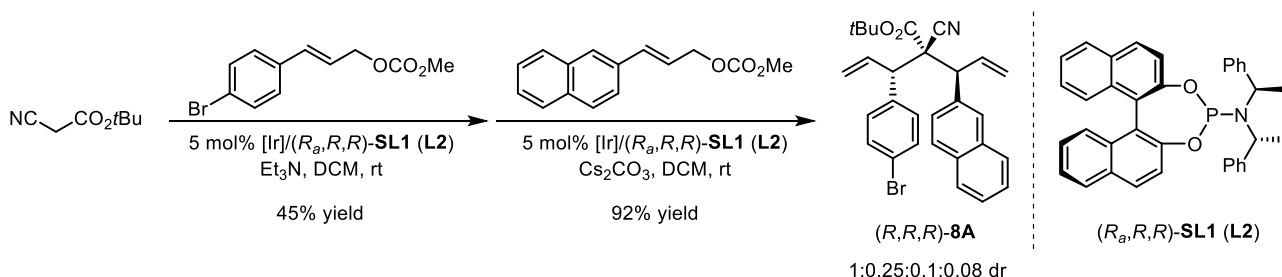

A flame dried Schlenk tube was cooled to rt and evacuated and backfilled with argon for three times. To this Schlenk tube were added [Ir(COD)Cl]<sub>2</sub> (0.005 mmol, 2.5 mol %), phosphoramidite ligand (*R<sub>a</sub>,R,R*)-SL1 (0.01 mmol, 5 mol %), degassed THF (0.5 mL) and degassed *n*-propylamine (0.5 mL). The reaction mixture was heated at 50 °C for 30 min and then the volatile solvents were removed under vacuum to give a pale yellow solid. Allylic carbonate **1d** (0.20 mmol), cyanoacetate **3** (0.20 mmol), Et<sub>3</sub>N (0.20 mmol), DCM (2 mL) were then added, and then reacted at room temperature for 12 h under Ar<sub>2</sub> atmosphere. The crude product was purified by silica-gel column chromatography to give the mono-allylic cyanoacetate **5d**. Then under Ar<sub>2</sub> atmosphere, [Ir(COD)Cl]<sub>2</sub> (0.005 mmol, 2.5 mol %),

phosphoramidite ligand (*R<sub>a</sub>,R,R*)-**SL1** (0.01 mmol, 5 mol %), degassed THF (0.5 mL) and degassed *n*-propylamine (0.5 mL) were heated at 50 °C for 30 min and then the volatile solvents were removed under vacuum to give Ir-complex. To this Schlenk tube allylic carbonate **1m** (0.20 mmol), mono-allylic cyanoacetate **5d**, Cs<sub>2</sub>CO<sub>3</sub> (0.20 mmol), DCM (2 mL) were then added, and then reacted at room temperature under Ar<sub>2</sub> atmosphere. Once starting material was consumed (monitored by TLC), the mixture was added water, and extracted with dichloromethane (3×). The dichloromethane layers were dried over anhydrous Na<sub>2</sub>SO<sub>4</sub>, filtered, and evaporated to give crude **8A**. The crude product was purified by silica-gel column chromatography to give **8A**.

#### IV. Optimization of the Asymmetric Monoallylation Reaction Conditions and General Procedure for Synthesis of Mono-Allylic Cyanoacetates and Krapcho Decarboxylation

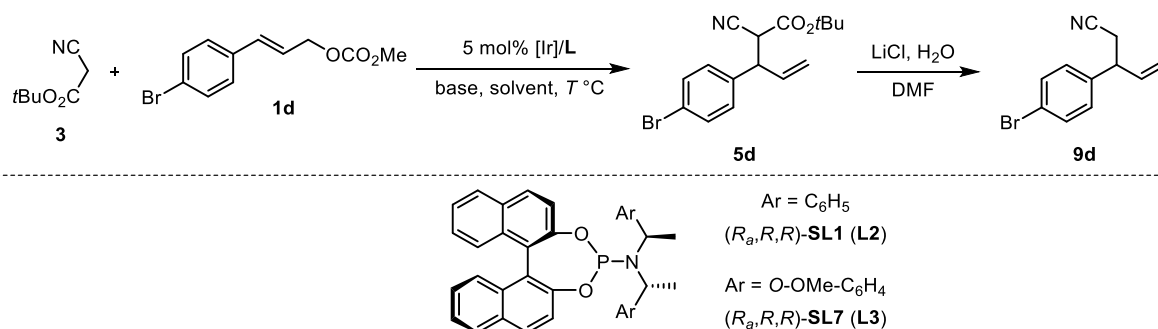

| Entry <sup>a</sup> | Ligand                                                 | Base                           | Solvent | T (°C)     | Yield of <b>5d</b> (%) <sup>b</sup> | Ee of <b>9d</b> (%) <sup>c</sup> |
|--------------------|--------------------------------------------------------|--------------------------------|---------|------------|-------------------------------------|----------------------------------|
| 1 <sup>d</sup>     | ( <i>R<sub>a</sub>,R,R</i> )- <b>SL1</b> ( <b>L2</b> ) | Et <sub>3</sub> N <sup>d</sup> | DCM     | room temp. | 47                                  | 90                               |
| 2 <sup>d</sup>     | ( <i>R<sub>a</sub>,R,R</i> )- <b>SL1</b> ( <b>L2</b> ) | DABCO                          | DCM     | room temp. | 43                                  | 88                               |
| 3 <sup>d</sup>     | ( <i>R<sub>a</sub>,R,R</i> )- <b>SL1</b> ( <b>L2</b> ) | DABCO                          | THF     | room temp. | 34                                  | 90                               |
| 4                  | ( <i>R<sub>a</sub>,R,R</i> )- <b>SL7</b> ( <b>L3</b> ) | DABCO                          | THF     | reflux     | 43                                  | 86                               |
| 5                  | ( <i>R<sub>a</sub>,R,R</i> )- <b>SL7</b> ( <b>L3</b> ) | DABCO                          | THF     | room temp. | 56                                  | 94                               |
| 6 <sup>e</sup>     | ( <i>R<sub>a</sub>,R,R</i> )- <b>SL7</b> ( <b>L3</b> ) | Et <sub>3</sub> N              | THF     | room temp. | 47                                  | 93                               |
| 7                  | ( <i>R<sub>a</sub>,R,R</i> )- <b>SL7</b> ( <b>L3</b> ) | DABCO                          | THF     | 0 °C       | 68                                  | 99                               |

<sup>a</sup> All the reactions were carried out with 0.2 mmol of **3**, 0.1 mmol of **1d** and 0.04 mmol base in 2 mL of solvent. <sup>b</sup> Isolated yields. <sup>c</sup> Ee was determined by chiral HPLC analysis. <sup>d</sup> 0.2 mmol Et<sub>3</sub>N was used. <sup>e</sup> 0.2 mmol of **3** and 0.2 mmol **1d** was used.

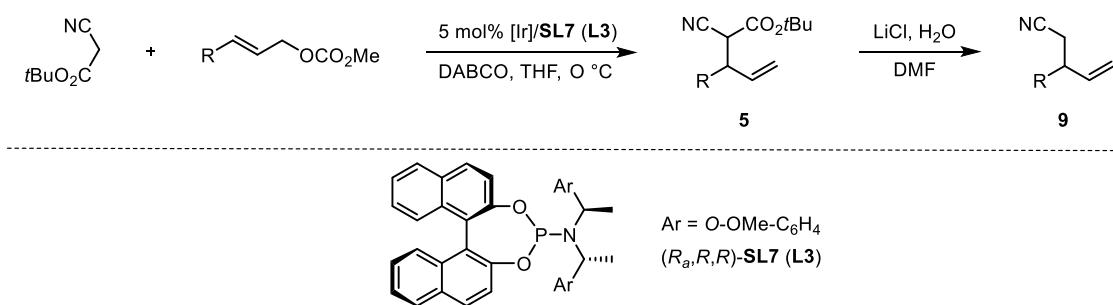

A flame dried Schlenk tube was cooled to rt and evacuated and backfilled with argon for three times. To this Schlenk tube were added [Ir(COD)Cl]<sub>2</sub> (0.01 mmol, 2.5 mol %), phosphoramidite ligand **SL7** (0.02 mmol, 5 mol %), degassed THF (1.0 mL) and degassed *n*-propylamine (1.0 mL). The reaction mixture was heated at 50 °C for 30 min and then the volatile solvents were removed under vacuum to give a pale yellow solid. allylic carbonates (0.40 mmol), Cyanoacetates (0.80 mmol), DABCO (0.08 mmol), DCM (4 mL) were then added, reacted at room temperature. Once starting material **1** was consumed (monitored by TLC), the mixture was added water, and extracted with dichloromethane (3×). The dichloromethane layers were dried over anhydrous Na<sub>2</sub>SO<sub>4</sub>, filtered, and evaporated to give crude **5**. The crude product was purified by silica-gel column chromatography to give **5**.

A Schlenk tube was evacuated and backfilled with argon for three times, then added LiCl (0.35 mmol), **5** (0.10 mmol), DMF (0.75 mL), and H<sub>2</sub>O (7 μL). The mixture was stirred under reflux for 1 h. After the reaction was complete, a saturated aqueous solution of NH<sub>4</sub>Cl (5 mL) was added. The aqueous layer was extracted three times with ether (2 mL). The combined organic layer was dried with Na<sub>2</sub>SO<sub>4</sub> filtered, and evaporated to give crude **9**. The crude product was purified by silica-gel column chromatography to give **9**.

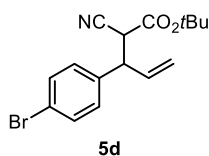

**tert-butyl 3-(4-bromophenyl)-2-cyanopent-4-enoate (Mixture of Diastereomers) (5d):** Yield (68%); pale yellow liquid; <sup>1</sup>H NMR (400 MHz, Chloroform-*d*) δ 7.53 – 7.45 (m, 4H), 7.24 – 7.14 (m, 4H), 6.17 – 5.99 (m, 2H), 5.35 – 5.20 (m, 4H), 4.02 – 3.94 (m, 2H), 3.75 (d, *J* = 7.2 Hz, 1H), 3.67 (d, *J* = 6.9 Hz, 1H), 1.39 (s, 9H), 1.39 (s, 9H). <sup>13</sup>C NMR (101 MHz, Chloroform-*d*) δ 163.4, 137.6, 136.8, 135.7, 134.4,



132.0, 131.9, 129.9, 129.5, 122.0, 121.8, 119.5, 118.4, 115.5, 84.51, 84.47, 49.1, 48.8, 44.8, 44.4, 27.7, 27.6.; HRMS (ESI+) Calcd. For  $C_{16}H_{18}BrNNaO_2^+$  ( $[M+Na]^+$ ): 358.0413, found: 358.0412.

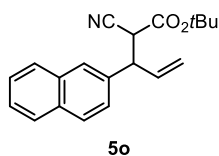

**tert-butyl 2-cyano-3-(naphthalen-2-yl)pent-4-enoate (Mixture of Diastereomers) (5o):** Yield (64%); pale yellow liquid;  $^1H$  NMR (400 MHz, Chloroform-*d*)  $\delta$  7.85 – 7.74 (m, 8H), 7.50 – 7.38 (m, 6H), 6.31 – 6.09 (m, 2H), 5.37 – 5.26 (m, 4H), 4.22 – 4.13 (m, 2H), 3.86 (d,  $J = 7.6$  Hz, 1H), 3.82 (d,  $J = 7.1$  Hz, 1H), 1.34 (s, 9H), 1.33 (s, 9H).  $^{13}C$  NMR (101 MHz, Chloroform-*d*)  $\delta$  163.74, 163.73, 136.2, 135.9, 135.3, 135.0, 133.3, 132.9, 132.8, 128.7, 128.6, 127.9, 127.8, 127.63, 127.62, 127.4, 126.8, 126.4, 126.3, 126.22, 126.18, 125.7, 125.4, 119.3, 118.2, 115.8, 115.7, 84.30, 84.25, 49.9, 49.7, 45.0, 44.6, 27.64, 27.61.; HRMS (ESI+) Calcd. For  $C_{20}H_{21}NNaO_2^+$  ( $[M+Na]^+$ ): 330.1465, found: 330.1468.

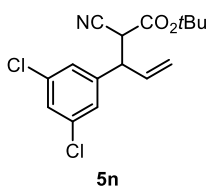

**tert-butyl 2-cyano-3-(3,5-dichlorophenyl)pent-4-enoate (Mixture of Diastereomers) (5n):** Yield (50%); pale yellow liquid;  $^1H$  NMR (400 MHz, Chloroform-*d*)  $\delta$  7.33 – 7.29 (m, 2H), 7.26 – 7.16 (m, 4H), 6.15 – 5.96 (m, 2H), 5.42 – 5.24 (m, 4H), 4.03 – 3.91 (m, 2H), 3.77 (d,  $J = 7.1$  Hz, 1H), 3.68 (d,  $J = 7.0$  Hz, 1H), 1.42 (s, 9H), 1.40 (s, 9H).  $^{13}C$  NMR (101 MHz, Chloroform-*d*)  $\delta$  163.13, 163.10, 141.8, 141.1, 135.4, 135.3, 134.7, 133.6, 128.2, 128.0, 126.8, 126.4, 120.3, 119.1, 115.1, 115.0, 84.9, 84.8, 49.0, 48.6, 44.5, 44.1, 27.63, 27.61.; HRMS (ESI+) Calcd. For  $C_{16}H_{17}Cl_2NNaO_2^+$  ( $[M+Na]^+$ ): 348.0529, found: 348.0529.

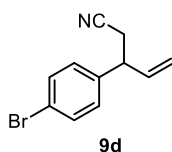

**3-(4-bromophenyl)pent-4-enitrile (9d):** Yield (72%); colorless liquid;  $^1H$  NMR (400 MHz,

Chloroform-*d*)  $\delta$  7.54 – 7.44 (m, 2H), 7.16 – 7.03 (m, 2H), 5.99 (ddd,  $J = 17.2, 10.4, 6.8$  Hz, 1H), 5.27 (dd,  $J = 10.4, 0.8$  Hz, 1H), 5.20 (dd,  $J = 17.2, 0.8$  Hz, 1H), 3.67 (dt,  $J = 6.8, 6.7$  Hz, 1H), 2.74 (dd,  $J = 16.2, 6.7$  Hz, 1H), 2.68 (dd,  $J = 16.2, 6.7$  Hz, 1H).  $^{13}\text{C}$  NMR (101 MHz, Chloroform-*d*)  $\delta$  139.2, 137.2, 132.1, 129.1, 121.5, 117.8, 117.3, 44.8, 23.8.; HRMS (ESI+) Calcd. For  $\text{C}_{11}\text{H}_{10}\text{BrNNa}^+$  ( $[\text{M}+\text{Na}]^+$ ): 257.9889, found: 257.9883. The product was analyzed by HPLC to determine the enantiomeric excess: 99% ee for (*S*)-**9d**, 99% ee for (*R*)-**9d** (Chiralcel OD-H, *i*-propanol/hexane = 2/98, flow rate 1.0 mL/min,  $\lambda = 220$  nm);  $t_r = 19.61$  and 23.67 min.

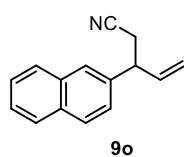

**3-(naphthalen-2-yl)pent-4-enitrile (9o):** Yield (80%); colorless liquid;  $^1\text{H}$  NMR (400 MHz, Chloroform-*d*)  $\delta$  7.86 – 7.80 (m, 3H), 7.70 – 7.66 (m, 1H), 7.52 – 7.44 (m, 2H), 7.33 (dd,  $J = 8.5, 1.9$  Hz, 1H), 6.11 (ddd,  $J = 17.2, 10.4, 6.9$  Hz, 1H), 5.30 (dd,  $J = 10.4, 1.0$  Hz, 1H), 5.25 (dd,  $J = 17.2, 1.1$  Hz, 1H), 3.86 (td,  $J = 7.2, 6.9$  Hz, 1H), 2.83 (dd,  $J = 16.8, 7.2$  Hz, 1H), 2.79 (dd,  $J = 16.8, 7.2$  Hz, 1H).  $^{13}\text{C}$  NMR (101 MHz, Chloroform-*d*)  $\delta$  137.7, 137.6, 133.4, 132.7, 128.8, 127.8, 127.6, 126.4, 126.08, 126.06, 125.2, 118.2, 117.1, 45.5, 23.8.; HRMS (ESI+) Calcd. For  $\text{C}_{15}\text{H}_{13}\text{NNa}^+$  ( $[\text{M}+\text{Na}]^+$ ): 230.0940, found: 230.0941. The product was analyzed by HPLC to determine the enantiomeric excess: 99% ee for (*S*)-**9o**, 99% ee for (*R*)-**9o** (Chiralcel OJ-H, *i*-propanol/hexane = 10/9, flow rate 1.0 mL/min,  $\lambda = 220$  nm);  $t_r = 36.09$  and 37.82 min.

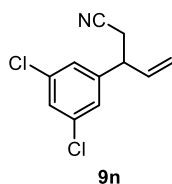

**3-(3,5-dichlorophenyl)pent-4-enitrile (9n):** Yield (75%); colorless liquid;  $^1\text{H}$  NMR (400 MHz, Chloroform-*d*)  $\delta$  7.30 (t,  $J = 1.9$  Hz, 1H), 7.13 (dd,  $J = 1.9, 0.5$  Hz, 2H), 5.96 (ddd,  $J = 17.2, 10.4, 6.9$  Hz, 1H), 5.33 (dd,  $J = 10.4, 0.4$  Hz, 1H), 5.24 (dd,  $J = 17.2, 0.8$  Hz, 1H), 3.66 (dt,  $J = 7.2, 6.9$  Hz, 1H), 2.81 – 2.70 (dd,  $J = 9.2, 7.2$  Hz, 1H), 2.75 – 2.64 (dd,  $J = 9.2, 7.2$  Hz, 1H).  $^{13}\text{C}$  NMR (101 MHz, Chloroform-*d*)  $\delta$  143.5, 136.3, 135.5, 127.9, 126.0, 118.1, 117.4, 44.8, 23.6.; HRMS (ESI+) Calcd. For

$C_{11}H_9Cl_2NNa^+$  ( $[M+Na]^+$ ): 248.0004, found: 248.0015. The product was analyzed by HPLC to determine the enantiomeric excess: 98% ee for (*S*)-**9n**, 95% ee for (*R*)-**9n** (Chiralpak IE, *i*-propanol/hexane = 1/99, flow rate 1.0 mL/min,  $\lambda$  = 206 nm);  $t_r$  = 11.92 and 12.69 min.

## V. Optimization of the Asymmetric Double Allylation Reaction Conditions

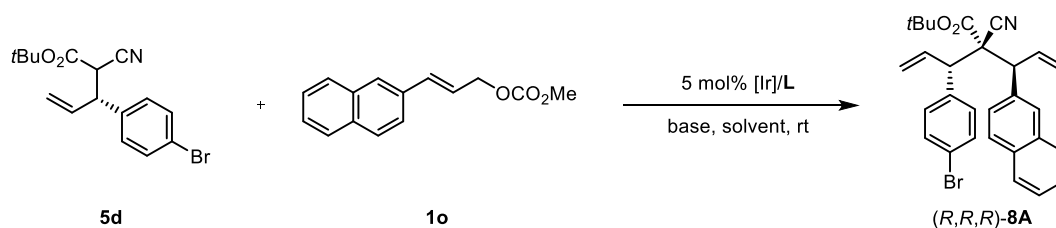

| Entry <sup>a</sup> | Ligand                                   | Base                            | Solvent           | Yield of <b>8A</b> (%) <sup>b</sup> | dr of <b>8A</b> (%) <sup>c</sup> |
|--------------------|------------------------------------------|---------------------------------|-------------------|-------------------------------------|----------------------------------|
| 1                  | ( <i>R<sub>a</sub>,R,R</i> )- <b>SL1</b> | Cs <sub>2</sub> CO <sub>3</sub> | THF               | 93                                  | 1:0.18:0.03:0.02                 |
| 2                  | ( <i>R<sub>a</sub>,R,R</i> )- <b>SL1</b> | Cs <sub>2</sub> CO <sub>3</sub> | toluene           | 90                                  | 1:0.25:0.05:0.01                 |
| 3                  | ( <i>R<sub>a</sub>,R,R</i> )- <b>SL1</b> | Cs <sub>2</sub> CO <sub>3</sub> | Et <sub>2</sub> O | 93                                  | 1:0.33:0.06:0.02                 |
| 4                  | ( <i>R<sub>a</sub>,R,R</i> )- <b>SL1</b> | Cs <sub>2</sub> CO <sub>3</sub> | MeOH              | 90                                  | 1:0.40:0.31:0.05                 |
| 5                  | ( <i>R<sub>a</sub>,R,R</i> )- <b>SL1</b> | Cs <sub>2</sub> CO <sub>3</sub> | MeCN              | 83                                  | 1:0.36:0.05:0.02                 |
| 6                  | ( <i>R<sub>a</sub>,R,R</i> )- <b>SL1</b> | Cs <sub>2</sub> CO <sub>3</sub> | DMF               | 95                                  | 1:0.41:0.10:0.03                 |
| 7                  | ( <i>R<sub>a</sub>,R,R</i> )- <b>SL1</b> | Cs <sub>2</sub> CO <sub>3</sub> | DCM               | 93                                  | 1:0.24:0.10:0.01                 |
| 8                  | ( <i>R<sub>a</sub>,R,R</i> )- <b>SL1</b> | Cs <sub>2</sub> CO <sub>3</sub> | DCE               | 94                                  | 1:0.25:0.09:0.01                 |
| 9                  | ( <i>R<sub>a</sub>,R,R</i> )- <b>SL1</b> | <i>t</i> BuOK                   | THF               | 38                                  | 1:0.19:0.03:0.01                 |
| 10                 | ( <i>R<sub>a</sub>,R,R</i> )- <b>SL1</b> | NaOH                            | THF               | 46                                  | 1:0.19:0.07:0.03                 |
| 11                 | ( <i>R<sub>a</sub>,R,R</i> )- <b>SL1</b> | DBU                             | THF               | 30                                  | 1:0.17:0.03:0.01                 |
| 12                 | ( <i>R<sub>a</sub>,R,R</i> )- <b>SL1</b> | <i>n</i> BuLi                   | THF               | 88                                  | 1:0.22:0.10:0.01                 |
| 13                 | ( <i>R<sub>a</sub>,R,R</i> )- <b>SL1</b> | LiHDMS                          | THF               | 33                                  | 1:0.39:0.03:0.03                 |
| 14                 | ( <i>R<sub>a</sub>,R,R</i> )- <b>SL1</b> | NaHDMS                          | THF               | 56                                  | 1:0.20:0.05:0.02                 |
| 15                 | ( <i>R<sub>a</sub>,R,R</i> )- <b>SL1</b> | Et <sub>3</sub> N               | THF               | 96                                  | 1:0.24:0.11:0.01                 |
| 16 <sup>d</sup>    | ( <i>R<sub>a</sub>,R,R</i> )- <b>SL1</b> | Cs <sub>2</sub> CO <sub>3</sub> | DCM               | 91                                  | 1:0.15:0.08:0.01                 |
| 17 <sup>d</sup>    | ( <i>R<sub>a</sub>,R,R</i> )- <b>SL1</b> | Cs <sub>2</sub> CO <sub>3</sub> | DCM/THF = 1:1     | 86                                  | 1:0.15:0.08:0.01                 |
| 18                 | ( <i>R<sub>a</sub>,R,R</i> )- <b>SL2</b> | Cs <sub>2</sub> CO <sub>3</sub> | THF               | <5                                  | /                                |
| 19                 | ( <i>R<sub>a</sub>,R,R</i> )- <b>SL3</b> | Cs <sub>2</sub> CO <sub>3</sub> | THF               | <5                                  | /                                |
| 20 <sup>d</sup>    | ( <i>R<sub>a</sub>,R,R</i> )- <b>SL2</b> | Cs <sub>2</sub> CO <sub>3</sub> | DCM               | 75                                  | 1:0.35:0.04:0.02                 |
| 21 <sup>d</sup>    | ( <i>R<sub>a</sub>,R,R</i> )- <b>SL3</b> | Cs <sub>2</sub> CO <sub>3</sub> | DCM               | 85                                  | 1:0.27:0.04:0.01                 |
| 22 <sup>d</sup>    | ( <i>R<sub>a</sub>,R,R</i> )- <b>SL4</b> | Cs <sub>2</sub> CO <sub>3</sub> | DCM               | 88                                  | 1:0.45:0.04:0.03                 |
| 23 <sup>d</sup>    | ( <i>R<sub>a</sub>,R,R</i> )- <b>SL5</b> | Cs <sub>2</sub> CO <sub>3</sub> | DCM               | 92                                  | 1:0.17:0.05:0.02                 |
| 24 <sup>d</sup>    | ( <i>R<sub>a</sub>,R,R</i> )- <b>SL6</b> | Cs <sub>2</sub> CO <sub>3</sub> | DCM               | 83                                  | 1:0.18:0.06:0.02                 |
| 25 <sup>d</sup>    | ( <i>R<sub>a</sub>,R,R</i> )- <b>SL7</b> | Cs <sub>2</sub> CO <sub>3</sub> | DCM               | 94                                  | 1:0.15:0.03:0                    |

|                 |                                           |                                 |     |    |                  |
|-----------------|-------------------------------------------|---------------------------------|-----|----|------------------|
| 26 <sup>d</sup> | ( <i>R<sub>a</sub>,R,R</i> )- <b>SL8</b>  | Cs <sub>2</sub> CO <sub>3</sub> | DCM | 75 | 1:0.12:0.03:0.01 |
| 27 <sup>d</sup> | ( <i>R<sub>a</sub>,R,R</i> )- <b>SL9</b>  | Cs <sub>2</sub> CO <sub>3</sub> | DCM | 81 | 1:0.14:0.05:0.02 |
| 28 <sup>d</sup> | ( <i>R<sub>a</sub>,R,R</i> )- <b>SL10</b> | Cs <sub>2</sub> CO <sub>3</sub> | DCM | 84 | 1:0.13:0.04:0.02 |
| 29 <sup>d</sup> | ( <i>R<sub>a</sub>,R,R</i> )- <b>SL11</b> | Cs <sub>2</sub> CO <sub>3</sub> | DCM | 90 | 1:0.21:0.05:0.02 |
| 30 <sup>d</sup> | ( <i>R<sub>a</sub>,R,R</i> )- <b>SL12</b> | Cs <sub>2</sub> CO <sub>3</sub> | DCM | 46 | 1:0.17:0.05:0.03 |
| 31 <sup>d</sup> | ( <i>R<sub>a</sub>,R,R</i> )- <b>SL13</b> | Cs <sub>2</sub> CO <sub>3</sub> | DCM | 78 | 1:0.20:0.05:0.02 |
| 32 <sup>d</sup> | ( <i>R<sub>a</sub>,R,R</i> )- <b>SL14</b> | Cs <sub>2</sub> CO <sub>3</sub> | DCM | 47 | 1:0.09:0.03:0.01 |
| 33              | ( <i>R<sub>a</sub>,R,R</i> )- <b>SL14</b> | Cs <sub>2</sub> CO <sub>3</sub> | DCM | 60 | 1:0.09:0.05:0.01 |
| 34              | ( <i>R<sub>a</sub>,R,R</i> )- <b>SL7</b>  | Cs <sub>2</sub> CO <sub>3</sub> | DCM | 95 | 1:0.16:0.03:0    |

<sup>a</sup> All reactions were carried out with 0.20 mmol **5d**, 0.2 mmol **1o** and 0.2 mmol base in 2 mL of solvent. <sup>b</sup> Yields refer to the isolated products after chromatographic purification. <sup>c</sup> The dr value was determined by <sup>1</sup>H NMR analysis. <sup>d</sup> Reaction was carried out at 0 °C.

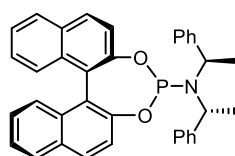

(*R<sub>a</sub>,R,R*)-**SL1** (L2)

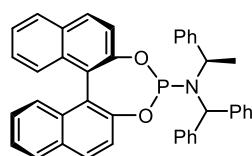

(*R<sub>a</sub>,R*)-**SL2**

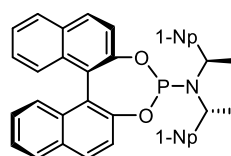

(*R<sub>a</sub>,R,R*)-**SL3**

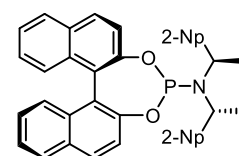

(*R<sub>a</sub>,R,R*)-**SL4**

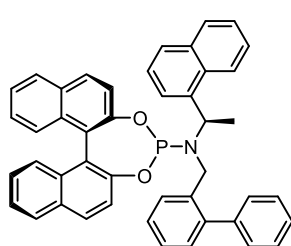

(*R<sub>a</sub>,R,R*)-**SL5**

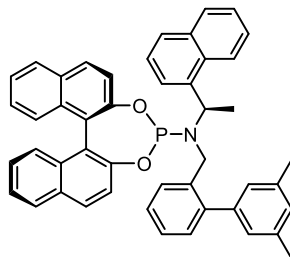

(*R<sub>a</sub>,R,R*)-**SL6**

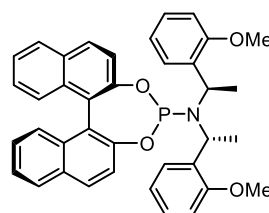

(*R<sub>a</sub>,R,R*)-**SL7** (L3)

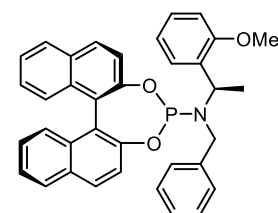

(*R<sub>a</sub>,R,R*)-**SL8**

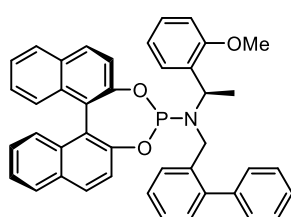

(*R<sub>a</sub>,R,R*)-**SL9**

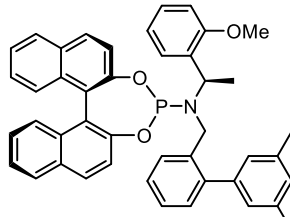

(*R<sub>a</sub>,R,R*)-**SL10**

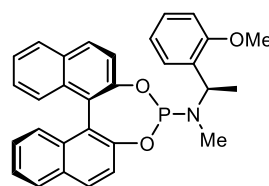

(*R<sub>a</sub>,R,R*)-**SL11**

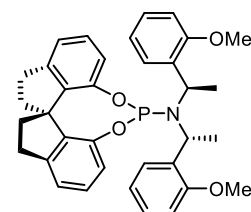

(*S<sub>a</sub>,R,R*)-**SL12**

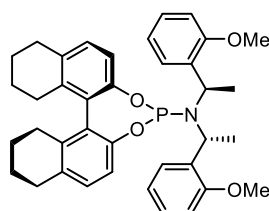

(*R<sub>a</sub>,R,R*)-**SL13**

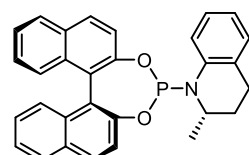

(*S<sub>a</sub>,S*)-**SL14**

## VI. Stereodivergent Synthesis of Bisallylated Cyanoacetates Bearing Continues Three Stereocenters

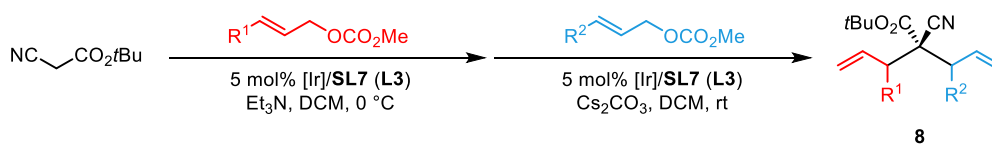

General Procedure for Synthesis of Bisallylated Cyanoacetates:

(*S,R,S*)-**8A** as example

A flame dried Schlenk tube was cooled to rt and evacuated and backfilled with argon for three times. To this Schlenk tube were added [Ir(COD)Cl]<sub>2</sub> (0.005 mmol, 2.5 mol %), phosphoramidite ligand (*S<sub>a</sub>,S,S*)-**SL7** (**L3**) (0.01 mmol, 5 mol %), degassed THF (0.5 mL) and degassed *n*-propylamine (0.5 mL). The reaction mixture was heated at 50 °C for 30 min and then the volatile solvents were removed under vacuum to give a pale yellow solid. Allylic carbonate **1a** (0.50 mmol), cyanoacetate **3** (1.00 mmol), DABCO (0.10 mmol), THF (10 mL) were then added, and then reacted at 0 °C for 12 h under Ar<sub>2</sub> atmosphere. The crude product was purified by silica-gel column chromatography to give the mono-allylic cyanoacetate **5o**.

Then under Ar<sub>2</sub> atmosphere, [Ir(COD)Cl]<sub>2</sub> (0.005 mmol, 2.5 mol %), phosphoramidite ligand (*S<sub>a</sub>,S,S*)-**SL7** (0.01 mmol, 5 mol %), degassed THF (0.5 mL) and degassed *n*-propylamine (0.5 mL) were heated at 50 °C for 30 min and then the volatile solvents were removed under vacuum to give Ir-complex. To this Schlenk tube allylic carbonate **1d** (0.20 mmol), mono-allylic cyanoacetate **5o** (0.20 mmol), Cs<sub>2</sub>CO<sub>3</sub> (0.20 mmol), DCM (2 mL) were then added, and then reacted at room temperature under Ar<sub>2</sub> atmosphere. Once starting material was consumed (monitored by TLC), the mixture was added water, and extracted with dichloromethane (3×). The dichloromethane layers were dried over anhydrous Na<sub>2</sub>SO<sub>4</sub>, filtered, and evaporated to give crude (*S,R,S*)-**8A**. The crude product was purified by silica-gel column chromatography to give (*S,R,S*)-**8A**.

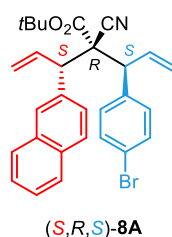

**tert-butyl (2R,3S)-3-(4-bromophenyl)-2-cyano-2-((S)-1-(naphthalen-2-yl)allyl)pent-4-enoate**

**((S,R,S)-8A):** Yield (94%); White solid, mp 88–90 °C;  $[\alpha]_D^{25} = 126.46$  (*c* 1.05, CH<sub>2</sub>Cl<sub>2</sub>); <sup>1</sup>H NMR (400 MHz, Chloroform-*d*) δ 7.82 – 7.76 (m, 4H), 7.57 (dd, *J* = 8.6, 1.9 Hz, 1H), 7.49 – 7.38 (m, 4H), 7.25 – 7.21 (m, 2H), 6.62 (ddd, *J* = 17.0, 10.0, 9.8 Hz, 1H), 6.30 (ddd, *J* = 16.9, 10.2, 9.4 Hz, 1H), 5.35 (dd, *J* = 10.2, 1.5 Hz, 1H), 5.244 (dd, *J* = 10.0, 1.6 Hz, 1H), 5.35 (dd, *J* = 17.0, 1.6 Hz, 1H), 5.17 (dd, *J* = 16.9, 2.0 Hz, 1H), 4.08 (d, *J* = 9.4 Hz, 1H), 3.84 (d, *J* = 9.8 Hz, 1H), 0.86 (s, 9H). <sup>13</sup>C NMR (101 MHz, Chloroform-*d*) δ 165.3, 137.4, 135.9, 134.3, 133.8, 133.2, 132.7, 131.6, 130.8, 128.2, 128.1, 127.9, 127.4, 126.6, 126.2, 126.1, 122.0, 120.2, 120.1, 118.3, 84.3, 58.4, 54.7, 53.5, 27.1.; HRMS (ESI+) Calcd. For C<sub>29</sub>H<sub>28</sub>BrNNaO<sub>2</sub><sup>+</sup> ([M+Na]<sup>+</sup>): 524.1196, found: 524.1179; dr = 1:0.12:0.02:0.

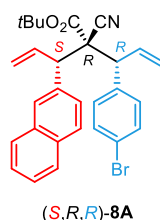

**tert-butyl (2R,3R)-3-(4-bromophenyl)-2-cyano-2-((S)-1-(naphthalen-2-yl)allyl)pent-4-enoate**

**((S,R,R)-8A):** Yield (98%); White solid, mp 88–90 °C;  $[\alpha]_D^{25} = 31.96$  (*c* 1.12, CH<sub>2</sub>Cl<sub>2</sub>); <sup>1</sup>H NMR (400 MHz, Chloroform-*d*) δ 7.78 (ddd, *J* = 8.8, 4.3, 2.4 Hz, 4H), 7.51 (dd, *J* = 8.6, 1.8 Hz, 1H), 7.46 – 7.40 (m, 4H), 7.30 – 7.26 (m, 2H), 6.46 (dddd, *J* = 16.9, 10.2, 8.8 Hz, 1H), 6.37 (dddd, *J* = 16.9, 10.2, 8.8 Hz, 1H), 5.30 (dd, *J* = 10.2, 1.6 Hz, 1H), 5.29 (dd, *J* = 10.2, 1.7 Hz, 1H), 5.18 (dd, *J* = 16.9, 2.3 Hz, 1H), 5.17 (dd, *J* = 16.9, 2.2 Hz, 1H), 4.05 (d, *J* = 8.8 Hz, 1H), 3.92 (d, *J* = 8.8 Hz, 1H), 0.79 (s, 9H). <sup>13</sup>C NMR (101 MHz, Chloroform-*d*) δ 165.1, 138.1, 136.2, 135.9, 135.7, 133.1, 132.7, 131.4, 130.9, 128.2, 128.0, 127.9, 127.5, 126.8, 126.2, 126.1, 121.7, 120.1, 120.0, 118.4, 84.1, 58.3, 56.2, 55.5, 26.9.; dr = 1:0.04:0.04:0.

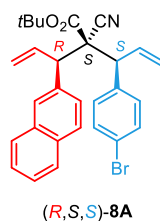

**tert-butyl (2R,3S)-3-(4-bromophenyl)-2-cyano-2-((R)-1-(naphthalen-2-yl)allyl)pent-4-enoate**

**((R,S,S)-8A):** Yield (99%); White solid, mp 84–86 °C;  $[\alpha]_D^{25} = -20.39$  (*c* 1.27, CH<sub>2</sub>Cl<sub>2</sub>); <sup>1</sup>H NMR (400 MHz, Chloroform-*d*)  $\delta$  7.78 (ddd, *J* = 8.8, 3.6, 2.4 Hz, 4H), 7.51 (dd, *J* = 8.6, 1.9 Hz, 1H), 7.46 – 7.40 (m, 4H), 7.29 – 7.26 (m, 2H), 6.46 (ddd, *J* = 16.9, 10.0, 8.8 Hz, 1H), 6.36 (ddd, *J* = 16.8, 10.0, 8.9 Hz, 1H), 5.30 (dd, *J* = 10.0, 1.6 Hz, 1H), 5.29 (dd, *J* = 10.0, 1.6 Hz, H), 5.18 (dd, *J* = 16.8, 2.0 Hz, 1H), 5.17 (dd, *J* = 16.9, 2.0 Hz, H), 4.05 (d, *J* = 8.8 Hz, 1H), 3.92 (d, *J* = 8.9 Hz, 1H), 0.79 (s, 9H). <sup>13</sup>C NMR (101 MHz, Chloroform-*d*)  $\delta$  165.1, 138.1, 136.2, 135.9, 135.7, 133.1, 132.7, 131.4, 130.9, 128.2, 128.0, 127.9, 127.5, 126.8, 126.2, 126.1, 121.7, 120.1, 120.0, 118.4, 84.1, 58.3, 56.2, 55.5, 26.9.; dr = 1:0.03:0.02:0.

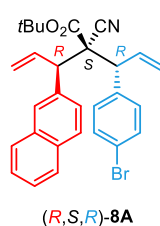

*tert*-butyl **(2S,3R)-3-(4-bromophenyl)-2-cyano-2-((R)-1-(naphthalen-2-yl)allyl)pent-4-enoate**

**((R,S,R)-8A):** Yield (95%); White solid, mp 84–86 °C;  $[\alpha]_D^{25} = -159.26$  (*c* 1.36, CH<sub>2</sub>Cl<sub>2</sub>); <sup>1</sup>H NMR (400 MHz, Chloroform-*d*)  $\delta$  7.82 – 7.76 (m, 4H), 7.57 (dd, *J* = 8.6, 1.9 Hz, 1H), 7.47 – 7.43 (m, 4H), 7.25 – 7.21 (m, 2H), 6.62 (ddd, *J* = 17.0, 10.0, 9.8 Hz, 1H), 6.30 (ddd, *J* = 16.9, 10.2, 9.4 Hz, 1H), 5.35 (dd, *J* = 10.2, 1.5 Hz, 1H), 5.244 (dd, *J* = 10.0, 1.5 Hz, 1H), 5.240 (dd, *J* = 17.0, 1.5 Hz, 1H), 5.18 (dd, *J* = 16.9, 2.1 Hz, 1H), 4.08 (d, *J* = 9.4 Hz, 1H), 3.84 (d, *J* = 9.8 Hz, 1H), 0.86 (s, 9H). <sup>13</sup>C NMR (101 MHz, Chloroform-*d*)  $\delta$  165.3, 137.4, 135.9, 134.3, 133.8, 133.2, 132.7, 131.6, 130.8, 128.2, 128.1, 127.9, 127.4, 126.6, 126.2, 126.1, 122.0, 120.2, 120.1, 118.3, 84.3, 58.4, 54.7, 53.5, 27.1.; dr = 1:0.12:0.02:0.

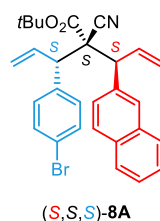

*tert*-butyl **(2S,3S)-3-(4-bromophenyl)-2-cyano-2-((S)-1-(naphthalen-2-yl)allyl)pent-4-enoate**

**((S,S,S)-8A):** Yield (92%); Pale yellow liquid;  $[\alpha]_D^{25} = 146.88$  (*c* 1.12, CH<sub>2</sub>Cl<sub>2</sub>); <sup>1</sup>H NMR (400 MHz, Chloroform-*d*)  $\delta$  7.86 – 7.73 (m, 4H), 7.48 – 7.38 (m, 5H), 7.34 – 7.30 (m, 2H), 6.72 (ddd, *J* = 17.0, 10.0, 10.0 Hz, 1H), 6.20 (ddd, *J* = 16.9, 10.2, 9.6 Hz, 1H), 5.34 (dd, *J* = 10.0, 1.5 Hz, 1H), 5.26 (dd, *J* = 17.0,

1.0 Hz, 1H), 5.21 (dd,  $J = 10.2, 1.5$  Hz, 1H), 5.15 (dd,  $J = 16.9, 1.0$  Hz, 1H), 3.98 (d,  $J = 10.0$  Hz, 1H), 3.94 (d,  $J = 9.6$  Hz, 1H), 1.01 (s, 9H).  $^{13}\text{C}$  NMR (101 MHz, Chloroform- $d$ )  $\delta$  165.3, 137.7, 135.7, 134.1, 134.0, 133.2, 132.9, 131.5, 130.9, 128.2, 128.1, 127.9, 127.6, 126.8, 126.2, 126.1, 121.7, 120.2, 120.0, 118.2, 84.4, 58.4, 55.3, 52.8, 27.2.; dr = 1:0.18:0.05:0.02.

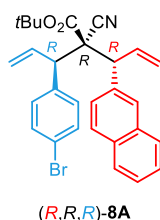

***tert*-butyl (2*R*,3*R*)-3-(4-bromophenyl)-2-cyano-2-((*R*)-1-(naphthalen-2-yl)allyl)pent-4-enoate**

**((*R,R,R*)-8A):** Yield (95%); Pale yellow liquid;  $[\alpha]_{\text{D}}^{25} = -124.13$  ( $c$  1.04,  $\text{CH}_2\text{Cl}_2$ );  $^1\text{H}$  NMR (400 MHz, Chloroform- $d$ )  $\delta$  7.81 – 7.76 (m, 4H), 7.47 – 7.41 (m, 5H), 7.35 – 7.30 (m, 2H), 6.72 (ddd,  $J = 17.0, 10.0, 10.0$  Hz, 1H), 6.20 (ddd,  $J = 16.9, 10.2, 9.3$  Hz, 1H), 5.34 (dd,  $J = 10.2, 1.5$  Hz, 1H), 5.25 (dd,  $J = 17.0, 2.0$  Hz, 1H), 5.21 (dd,  $J = 10.0, 1.5$  Hz, 1H), 5.15 (dd,  $J = 16.9, 2.1$  Hz, 1H), 3.98 (d,  $J = 9.3$  Hz, 1H), 3.96 (d,  $J = 10.0$  Hz, 1H), 1.01 (s, 9H).  $^{13}\text{C}$  NMR (101 MHz, Chloroform- $d$ )  $\delta$  165.3, 137.7, 135.7, 134.1, 134.0, 133.2, 132.9, 131.6, 131.5, 130.9, 128.2, 128.1, 127.9, 127.6, 126.8, 126.2, 126.1, 121.7, 120.2, 120.0, 118.2, 84.4, 58.4, 55.3, 52.8, 27.2.; dr = 1:0.16:0.03:0.

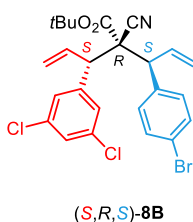

***tert*-butyl (2*R*,3*S*)-3-(4-bromophenyl)-2-cyano-2-((*S*)-1-(3,5-dichlorophenyl)allyl)pent-4-enoate**

**((*S,R,S*)-8B):** Yield (83%); Pale yellow liquid;  $[\alpha]_{\text{D}}^{25} = 86.85$  ( $c$  1.08,  $\text{CH}_2\text{Cl}_2$ );  $^1\text{H}$  NMR (400 MHz, Chloroform- $d$ )  $\delta$  7.48 – 7.42 (m, 2H), 7.29 (d,  $J = 1.9$  Hz, 2H), 7.27 – 7.26 (m, 1H), 7.22 – 7.17 (m, 2H), 6.53 (ddd,  $J = 17.0, 10.0, 9.8$  Hz, 1H), 6.10 (ddd,  $J = 17.0, 10.3, 9.4$  Hz, 1H), 5.33 (dd,  $J = 10.0, 1.5$  Hz, 1H), 5.27 (dd,  $J = 10.3, 1.2$  Hz, 1H), 5.20 (dd,  $J = 17.0, 1.6$  Hz, 1H), 5.16 (dd,  $J = 17.0, 1.6$  Hz, 1H), 3.85 (d,  $J = 9.4$  Hz, 1H), 3.75 (d,  $J = 9.8$  Hz, 1H), 1.11 (s, 9H).  $^{13}\text{C}$  NMR (101 MHz, Chloroform- $d$ )  $\delta$  164.9, 141.8, 136.9, 135.0, 133.3, 133.0, 131.7, 130.7, 127.8, 127.5, 122.1, 121.1, 120.5, 117.6, 85.0,



57.9, 54.6, 52.6, 27.3.; HRMS (ESI+) Calcd. For  $C_{25}H_{24}BrCl_2NNaO_2^+$  ( $[M+Na]^+$ ): 542.0260, found: 542.0257; dr = 1:0.07:0.03:0.

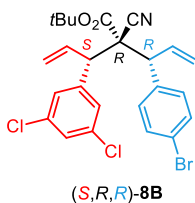

**tert-butyl (2R,3R)-3-(4-bromophenyl)-2-cyano-2-((S)-1-(3,5-dichlorophenyl)allyl)pent-4-enoate ((S,R,R)-8B):** Yield (94%); Pale yellow solid, mp 63–65 °C;  $[\alpha]_D^{25} = -21.50$  (*c* 1.27, CH<sub>2</sub>Cl<sub>2</sub>); <sup>1</sup>H NMR (400 MHz, Chloroform-*d*) δ 7.44 – 7.41 (m, 2H), 7.26 – 7.23 (m, 5H), 6.28 (ddd, *J* = 16.8, 10.2, 9.2 Hz, 1H), 6.26 (ddd, *J* = 16.8, 10.4, 9.2 Hz, 1H), 5.32 (d, *J* = 10.2 Hz, 1H), 5.32 (dd, *J* = 10.4, 0.8 Hz, 1H), 5.17 (dd, *J* = 16.8, 2.0 Hz, 1H), 5.16 (dd, *J* = 16.8, 2.0 Hz, 1H), 3.82 (d, *J* = 9.2 Hz, 1H), 3.81 (d, *J* = 9.2 Hz, 1H), 0.99 (s, 9H). <sup>13</sup>C NMR (101 MHz, Chloroform-*d*) δ 164.8, 142.0, 137.6, 135.2, 134.8, 134.7, 131.5, 130.8, 127.8, 127.6, 121.9, 121.0, 120.4, 117.7, 84.8, 57.8, 55.5, 55.1, 27.1.; dr = 1:0.07:0.03:0.01.

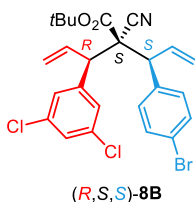

**tert-butyl (2S,3S)-3-(4-bromophenyl)-2-cyano-2-((R)-1-(3,5-dichlorophenyl)allyl)pent-4-enoate ((R,S,S)-8B):** Yield (91%); Pale yellow solid, mp 63–65 °C;  $[\alpha]_D^{25} = 20.82$  (*c* 1.22, CH<sub>2</sub>Cl<sub>2</sub>); <sup>1</sup>H NMR (400 MHz, Chloroform-*d*) δ 7.43 (d, *J* = 8.5 Hz, 2H), 7.26 – 7.22 (m, 5H), 6.27 (dtd, *J* = 16.9, 10.4, 8.9 Hz, 1H), 6.27 (ddd, *J* = 16.9, 10.2, 9.2 Hz, 1H), 6.27 (ddd, *J* = 17.2, 10.2, 9.2 Hz, 1H), 5.32 (dd, *J* = 10.2, 1.6 Hz, 1H), 5.29 (dd, *J* = 10.2, 1.6 Hz, 1H), 5.17 (dd, *J* = 17.2, 2.0 Hz, 1H), 5.16 (dd, *J* = 16.9, 2.0 Hz, 1H), 3.82 (d, *J* = 9.2 Hz, 1H), 3.81 (d, *J* = 9.2 Hz, 1H), 0.99 (s, 9H). <sup>13</sup>C NMR (101 MHz, Chloroform-*d*) δ 164.8, 142.0, 137.6, 135.2, 134.8, 134.7, 131.5, 130.8, 127.8, 127.6, 121.9, 121.0, 120.4, 117.7, 84.8, 57.8, 55.5, 55.1, 27.1.; dr = 1:0.04:0.02:0.

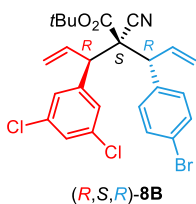

**tert-butyl (2S,3R)-3-(4-bromophenyl)-2-cyano-2-((R)-1-(3,5-dichlorophenyl)allyl)pent-4-enoate ((R,S,R)-8B):** Yield (91%); Pale yellow liquid;  $[\alpha]_D^{25} = -85.43$  (*c* 0.94, CH<sub>2</sub>Cl<sub>2</sub>); <sup>1</sup>H NMR (400 MHz, Chloroform-*d*)  $\delta$  7.48 – 7.43 (m, 2H), 7.29 (d, *J* = 1.9 Hz, 2H), 7.26 (d, *J* = 2.1 Hz, 1H), 7.21 – 7.18 (m, 2H), 6.53 (ddd, *J* = 17.0, 10.0, 9.9 Hz, 1H), 6.10 (ddd, *J* = 16.9, 10.2, 9.4 Hz, 1H), 5.33 (dd, *J* = 10.2, 1.5 Hz, 1H), 5.27 (dd, *J* = 10.2, 1.1 Hz, 1H), 5.22 (dd, *J* = 17.0, 1.1 Hz, 1H), 5.16 (dd, *J* = 16.9, 1.1 Hz, 1H), 3.85 (d, *J* = 9.4 Hz, 1H), 3.75 (d, *J* = 9.9 Hz, 1H), 1.11 (s, 9H). <sup>13</sup>C NMR (101 MHz, Chloroform-*d*)  $\delta$  164.9, 141.8, 136.9, 134.9, 133.3, 133.0, 131.7, 130.7, 127.8, 127.5, 122.1, 121.1, 120.5, 117.6, 85.0, 57.9, 54.6, 52.7, 27.3.; dr = 1:0.07:0.03:0.

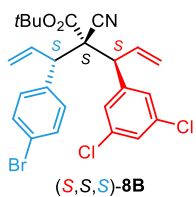

**tert-butyl (2S,3S)-3-(4-bromophenyl)-2-cyano-2-((S)-1-(3,5-dichlorophenyl)allyl)pent-4-enoate ((S,S,S)-8B):** Yield (99%); Pale yellow liquid;  $[\alpha]_D^{25} = 88.98$  (*c* 0.89, CH<sub>2</sub>Cl<sub>2</sub>); <sup>1</sup>H NMR (400 MHz, Chloroform-*d*)  $\delta$  7.43 (d, *J* = 8.6 Hz, 2H), 7.31 – 7.28 (m, 3H), 7.19 (d, *J* = 1.9 Hz, 2H), 6.52 (ddd, *J* = 16.9, 10.0, 9.9 Hz, 1H), 6.18 (ddd, *J* = 16.9, 10.2, 9.5 Hz, 1H), 5.36 (dd, *J* = 10.0, 1.4 Hz, 1H), 5.28 (dd, *J* = 10.2, 1.3 Hz, 1H), 5.23 (dd, *J* = 16.9, 1.3 Hz, 1H), 5.28 (dd, *J* = 16.9, 1.4 Hz, 1H), 3.86 (d, *J* = 9.5 Hz, 1H), 3.73 (d, *J* = 9.9 Hz, 1H), 1.08 (s, 9H). <sup>13</sup>C NMR (101 MHz, Chloroform-*d*)  $\delta$  164.9, 141.5, 137.3, 135.0, 133.6, 132.7, 131.6, 130.8, 128.2, 127.5, 121.9, 121.1, 120.6, 117.6, 85.1, 57.9, 54.5, 52.7, 27.3.; dr = 1:0.19:0.02:0.01.

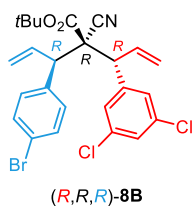

**tert-butyl (2R,3R)-3-(4-bromophenyl)-2-cyano-2-((R)-1-(3,5-dichlorophenyl)allyl)pent-4-enoate**

**((R,R,R)-8B):** Yield (97%); Pale yellow liquid;  $[\alpha]_D^{25} = -97.83$  (*c* 0.92, CH<sub>2</sub>Cl<sub>2</sub>); <sup>1</sup>H NMR (400 MHz, Chloroform-*d*)  $\delta$  7.45 – 7.41 (m, 2H), 7.31 – 7.28 (m, 3H), 7.19 (d, *J* = 1.9 Hz, 2H), 6.52 (ddd, *J* = 16.9, 10.1, 9.6 Hz, 1H), 6.18 (ddd, *J* = 16.9, 10.2, 9.9 Hz, 1H), 5.36 (dd, *J* = 10.1, 1.3 Hz, 1H), 5.28 (dd, *J* = 10.2, 1.3 Hz, 1H), 5.23 (dd, *J* = 10.2, 1.0 Hz, 1H), 5.18 (dd, *J* = 16.9, 1.0 Hz, 1H), 3.87 (d, *J* = 9.6 Hz, 1H), 3.74 (d, *J* = 9.9 Hz, 1H), 1.08 (s, 9H). <sup>13</sup>C NMR (101 MHz, Chloroform-*d*)  $\delta$  164.9, 141.5, 137.3, 135.0, 133.6, 132.7, 131.6, 130.8, 128.1, 127.5, 121.9, 121.0, 120.6, 117.6, 85.1, 57.8, 54.5, 52.7, 27.3.; *dr* = 1:0.19:0.02:0.01.

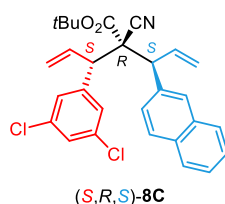

**tert-butyl (2R,3S)-3-(4-bromophenyl)-2-cyano-2-((S)-1-(3,5-dichlorophenyl)allyl)pent-4-enoate**

**((S,R,S)-8C):** Yield (93%); White solid, mp 88–90 °C;  $[\alpha]_D^{25} = 80.56$  (*c* 0.90, CH<sub>2</sub>Cl<sub>2</sub>); <sup>1</sup>H NMR (400 MHz, Chloroform-*d*)  $\delta$  7.82 – 7.76 (m, 4H), 7.48 – 7.44 (m, 3H), 7.32 (d, *J* = 1.9 Hz, 2H), 7.26 – 7.24 (m, 1H), 6.70 (dd, *J* = 17.0, 10.0, 9.9 Hz, 1H), 6.15 (ddd, *J* = 16.9, 10.2, 9.3 Hz, 1H), 5.34 (dd, *J* = 10.1, 1.6 Hz, 1H), 5.25 (dd, *J* = 17.0, 0.8 Hz, 1H), 5.34 (dd, *J* = 10.2, 1.2 Hz, 1H), 5.17 (dd, *J* = 16.8, 1.6 Hz, 1H), 3.96 (d, *J* = 9.9 Hz, 1H), 3.93 (d, *J* = 9.3 Hz, 1H), 1.08 (s, 9H). <sup>13</sup>C NMR (101 MHz, Chloroform-*d*)  $\delta$  165.2, 142.0, 135.4, 134.9, 133.9, 133.23, 133.21, 132.9, 128.3, 128.2, 128.0, 127.8, 127.6, 126.8, 126.3, 126.2, 121.0, 120.2, 117.8, 84.8, 58.1, 55.3, 52.7, 27.3.; HRMS (ESI+) Calcd. For C<sub>29</sub>H<sub>27</sub>Cl<sub>2</sub>NNaO<sub>2</sub><sup>+</sup> ([M+Na]<sup>+</sup>): 514.1311, found: 514.1307; *dr* = 1:0.07:0.04:0.

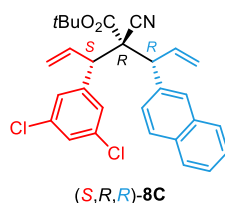

**tert-butyl (2R,3S)-2-cyano-3-(3,5-dichlorophenyl)-2-((R)-1-(naphthalen-2-yl)allyl)pent-4-enoate**

**((S,R,R)-8C):** Yield (98%); White solid, mp 98–100 °C;  $[\alpha]_D^{25} = -34.00$  (*c* 0.84, CH<sub>2</sub>Cl<sub>2</sub>); <sup>1</sup>H NMR (400 MHz, Chloroform-*d*)  $\delta$  7.78 (dd, *J* = 9.2, 2.3 Hz, 4H), 7.50 (dd, *J* = 8.6, 1.8 Hz, 1H), 7.48 – 7.44 (m, 2H), 7.29 (d, *J* = 1.9 Hz, 2H), 7.26 (d, *J* = 1.8 Hz, 1H), 6.44 (ddd, *J* = 16.9, 10.2, 8.9 Hz, 1H), 6.32 (ddd, *J* =

16.9, 10.2, 8.9 Hz, 1H), 5.35 (d,  $J = 10.2$  Hz, 1H), 5.30 (d,  $J = 10.2$  Hz, 1H), 5.21 (d,  $J = 16.9$  Hz, 1H), 5.20 (d,  $J = 16.9$  Hz, 1H), 4.03 (d,  $J = 8.9$  Hz, 1H), 3.90 (d,  $J = 8.9$  Hz, 1H), 0.85 (s, 9H).  $^{13}\text{C}$  NMR (101 MHz, Chloroform- $d$ )  $\delta$  164.9, 142.3, 136.0, 135.7, 134.9, 134.8, 133.1, 132.7, 128.2, 128.1, 127.9, 127.7, 127.6, 127.5, 126.7, 126.24, 126.17, 120.9, 120.2, 117.9, 84.5, 58.1, 56.3, 55.2, 27.0.; dr = 1:0.03:0.03:0.

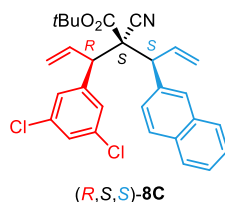

**tert-butyl (2*S*,3*R*)-2-cyano-3-(3,5-dichlorophenyl)-2-((*S*)-1-(naphthalen-2-yl)allyl)pent-4-enoate ((*R,S,S*)-**8C**):** Yield (96%); White solid, mp 99–101 °C;  $[\alpha]_D^{25} = 35.64$  ( $c$  0.94,  $\text{CH}_2\text{Cl}_2$ );  $^1\text{H}$  NMR (400 MHz, Chloroform- $d$ )  $\delta$  7.79 (dd,  $J = 9.2, 2.2$  Hz, 4H), 7.50 (dd,  $J = 8.7, 1.8$  Hz, 2H), 7.49 – 7.42 (m, 3H), 7.29 (d,  $J = 1.9$  Hz, 2H), 7.26 – 7.24 (m, 2H), 6.44 (ddd,  $J = 16.9, 10.2, 8.9$  Hz, 1H), 6.32 (ddd,  $J = 16.9, 10.2, 8.9$  Hz, 1H), 5.35 (d,  $J = 10.2$  Hz, 2H), 5.31 (dd,  $J = 10.2, 1.2$  Hz, 2H), 5.209 (dd,  $J = 16.9, 1.2$  Hz, 1H), 5.203 (dd,  $J = 16.9, 1.2$  Hz, 1H), 4.03 (d,  $J = 8.9$  Hz, 1H), 3.90 (d,  $J = 8.9$  Hz, 1H), 0.85 (s, 9H).  $^{13}\text{C}$  NMR (101 MHz, Chloroform- $d$ )  $\delta$  164.9, 142.3, 136.0, 135.7, 134.9, 134.8, 133.1, 132.7, 128.2, 128.1, 127.9, 127.7, 127.6, 127.5, 126.7, 126.2, 126.2, 120.9, 120.2, 118.0, 84.6, 58.1, 56.3, 55.2, 27.0.; dr = 1:0.03:0.02:0.01.

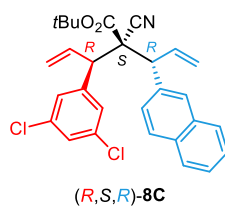

**tert-butyl (2*S*,3*R*)-2-cyano-3-(3,5-dichlorophenyl)-2-((*R*)-1-(naphthalen-2-yl)allyl)pent-4-enoate ((*R,S,R*)-**8C**):** Yield (93%); White solid, mp 88–90 °C;  $[\alpha]_D^{25} = -106.00$  ( $c$  1.12,  $\text{CH}_2\text{Cl}_2$ );  $^1\text{H}$  NMR (400 MHz, Chloroform- $d$ )  $\delta$  7.82 – 7.76 (m, 4H), 7.48 – 7.43 (m, 3H), 7.32 (d,  $J = 1.9$  Hz, 2H), 7.26 (t,  $J = 1.9$  Hz, 1H), 6.70 (dd,  $J = 17.0, 10.0, 9.9$  Hz, 1H), 6.15 (ddd,  $J = 16.9, 10.2, 9.4$  Hz, 1H), 5.34 (dd,  $J = 10.2, 1.5$  Hz, 1H), 5.25 (dd,  $J = 17.0, 1.2$  Hz, 1H), 5.24 (dd,  $J = 10.0, 1.0$  Hz, 1H), 5.17 (dd,  $J = 16.9, 1.0$  Hz, 1H), 3.96 (d,  $J = 9.9$  Hz, 1H), 3.93 (d,  $J = 9.4$  Hz, 1H), 1.08 (s, 9H).  $^{13}\text{C}$  NMR (101 MHz, Chloroform- $d$ )  $\delta$  165.2, 142.0, 135.4, 134.9, 133.9, 133.2, 133.2, 132.9, 128.3, 128.2, 128.0, 127.8,

127.6, 126.8, 126.3, 126.2, 121.0, 120.2, 117.8, 84.8, 58.1, 55.3, 52.7, 27.3.; dr = 1:0.08:0.04:0.

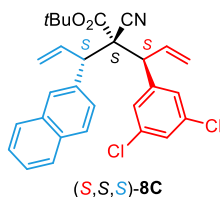

**tert-butyl (2S,3S)-2-cyano-3-(3,5-dichlorophenyl)-2-((S)-1-(naphthalen-2-yl)allyl)pent-4-enoate**

**((S,S,S)-8C):** Yield (88%); White solid, mp 105–107 °C;  $[\alpha]_D^{25} = 143.60$  (*c* 1.50, CH<sub>2</sub>Cl<sub>2</sub>); <sup>1</sup>H NMR (400 MHz, Chloroform-*d*) δ 7.83 – 7.77 (m, 4H), 7.58 (dd, *J* = 8.6, 1.9 Hz, 1H), 7.45 (ddd, *J* = 7.5, 3.5, 1.9 Hz, 2H), 7.29 (t, *J* = 1.9 Hz, 1H), 7.23 (d, *J* = 1.9 Hz, 2H), 6.59 (ddd, *J* = 17.0, 10.0, 9.6 Hz, 1H), 6.33 (ddd, *J* = 16.9, 10.1, 9.9 Hz, 1H), 5.39 (dd, *J* = 10.1, 1.4 Hz, 1H), 5.30 (dd, *J* = 10.0, 1.2 Hz, 1H), 5.26 (dd, *J* = 10.1, 1.2 Hz, 1H), 5.39 (dd, *J* = 10.1, 1.4 Hz, 1H), 4.08 (d, *J* = 9.6 Hz, 1H), 3.81 (d, *J* = 9.9 Hz, 1H), 0.89 (s, 9H). <sup>13</sup>C NMR (101 MHz, Chloroform-*d*) δ 165.1, 141.7, 135.7, 135.0, 134.2, 133.2, 133.1, 132.7, 128.21, 128.18, 128.1, 127.9, 127.6, 127.5, 126.5, 126.2, 126.1, 120.9, 120.3, 117.9, 84.8, 58.1, 54.7, 53.5, 27.1; dr = 1:0.15:0.03:0.01.

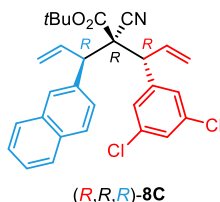

**tert-butyl (2R,3R)-2-cyano-3-(3,5-dichlorophenyl)-2-((R)-1-(naphthalen-2-yl)allyl)pent-4-enoate**

**((R,R,R)-8C):** Yield (96%); White solid, mp 105–107 °C;  $[\alpha]_D^{25} = -127.44$  (*c* 1.33, CH<sub>2</sub>Cl<sub>2</sub>); <sup>1</sup>H NMR (400 MHz, Chloroform-*d*) δ 7.83 – 7.77 (m, 4H), 7.58 (dd, *J* = 8.6, 1.9 Hz, 1H), 7.47 – 7.43 (m, 2H), 7.29 (t, *J* = 1.9 Hz, 1H), 7.23 (d, *J* = 1.8 Hz, 2H), 6.59 (ddd, *J* = 17.0, 10.8, 9.8 Hz, 1H), 6.33 (ddd, *J* = 16.9, 10.0, 9.5 Hz, 1H), 5.39 (dd, *J* = 10.0, 1.4 Hz, 1H), 5.29 (dd, *J* = 10.8, 1.2 Hz, 1H), 5.26 (dd, *J* = 17.2, 1.4 Hz, 1H), 5.22 (dd, *J* = 16.9, 1.2 Hz, 1H), 4.08 (d, *J* = 9.5 Hz, 1H), 3.81 (d, *J* = 9.8 Hz, 1H), 0.89 (s, 9H). <sup>13</sup>C NMR (101 MHz, Chloroform-*d*) δ 165.1, 141.7, 135.7, 135.0, 134.2, 133.2, 133.1, 132.7, 128.21, 128.18, 128.1, 127.9, 127.6, 127.5, 126.5, 126.2, 126.1, 120.9, 120.3, 117.9, 84.8, 58.1, 54.7, 53.5, 27.1.; dr = 1:0.15:0.03:0.01.

## VII. Synthesis of (*S,s,R*)-*meso*-7d

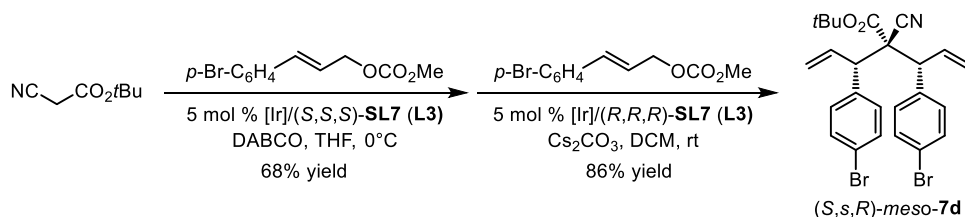

A flame dried Schlenk tube was cooled to rt and evacuated and backfilled with argon for three times. To this Schlenk tube were added  $[\text{Ir}(\text{COD})\text{Cl}]_2$  (0.005 mmol, 2.5 mol %), phosphoramidite ligand (*S<sub>a</sub>S<sub>a</sub>S<sub>a</sub>*)-**SL7 (L3)** (0.01 mmol, 5 mol %), degassed THF (0.5 mL) and degassed *n*-propylamine (0.5 mL). The reaction mixture was heated at  $50^\circ\text{C}$  for 30 min and then the volatile solvents were removed under vacuum to give a pale yellow solid. Allylic carbonate **1d** (0.50 mmol), cyanoacetate **3** (1.00 mmol), DABCO (0.10 mmol), THF (10 mL) were then added, and then reacted at  $0^\circ\text{C}$  for 12 h under  $\text{Ar}_2$  atmosphere. The crude product was purified by silica-gel column chromatography to give the mono-allylic cyanoacetate **5d**.

Then under  $\text{Ar}_2$  atmosphere,  $[\text{Ir}(\text{COD})\text{Cl}]_2$  (0.005 mmol, 2.5 mol %), phosphoramidite ligand (*R<sub>a</sub>R<sub>a</sub>R<sub>a</sub>*)-**SL7 (L3)** (0.01 mmol, 5 mol %), degassed THF (0.5 mL) and degassed *n*-propylamine (0.5 mL) were heated at  $50^\circ\text{C}$  for 30 min and then the volatile solvents were removed under vacuum to give Ir-complex. To this Schlenk tube allylic carbonate **1d** (0.20 mmol), mono-allylic cyanoacetate **5d** (0.20 mmol),  $\text{Cs}_2\text{CO}_3$  (0.20 mmol), DCM (2 mL) were then added, and then reacted at room temperature under  $\text{Ar}_2$  atmosphere. Once starting material was consumed (monitored by TLC), the mixture was added water, and extracted with dichloromethane (3 $\times$ ). The dichloromethane layers were dried over anhydrous  $\text{Na}_2\text{SO}_4$ , filtered, and evaporated to give crude (*S,s,R*)-*meso*-7d. The crude product was purified by silica-gel column chromatography to give (*S,s,R*)-*meso*-7d.

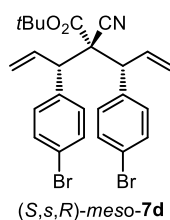

*tert*-butyl (2*s*,3*S*)-3-(4-bromophenyl)-2-((*R*)-1-(4-bromophenyl)allyl)-2-cyanopent-4-enoate

((*S*,*s*,*R*)-*meso*-**7d**): Yield (86%); White solid, mp 158–160 °C;  $[\alpha]_D^{25} = 0.03$  (*c* 1.02, CH<sub>2</sub>Cl<sub>2</sub>); <sup>1</sup>H NMR (400 MHz, Chloroform-*d*) δ 7.44 – 7.38 (m, 4H), 7.26 – 7.19 (m, 4H), 6.30 (ddd, *J* = 16.9, 10.2, 8.9 Hz, 2H), 5.27 (dd, *J* = 10.3, 0.9 Hz, 1H), 5.26 (dd, *J* = 10.3, 1.2 Hz, 1H), 5.14 (dd, *J* = 16.9, 0.9 Hz, 1H), 5.13 (dd, *J* = 16.9, 1.2 Hz, 1H), 3.83 (d, *J* = 8.9 Hz, 2H), 0.94 (s, 9H). <sup>13</sup>C NMR (101 MHz, Chloroform-*d*) δ 164.9, 137.8, 135.4, 131.5, 130.9, 121.8, 120.2, 118.1, 84.4, 58.0, 55.4, 27.1.

## VIII. Gram Scales and Synthetic Transformations

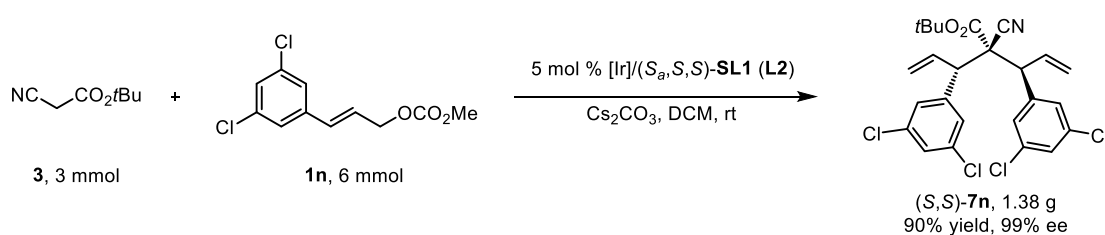

A flame dried Schlenk tube was cooled to rt and evacuated and backfilled with argon for three times. To this Schlenk tube were added [Ir(COD)Cl]<sub>2</sub> (0.075 mmol, 2.5 mol %), phosphoramidite ligand (*R*,*a*,*R*,*R*)-**SL7** (**L3**) (0.15 mmol, 5 mol %), degassed THF (7.5 mL) and degassed *n*-propylamine (7.5 mL). The reaction mixture was heated at 50 °C for 30 min and then the volatile solvents were removed under vacuum to give a pale yellow solid. allylic carbonates **1n** (6.00 mmol), Cyanoacetates **3** (3.00 mmol), Cs<sub>2</sub>CO<sub>3</sub> (6.00 mmol), DCM (30 mL) were then added, reacted at room temperature. Once starting material was consumed (monitored by TLC), the mixture was added water, and extracted with dichloromethane (3×). The dichloromethane layers were dried over anhydrous Na<sub>2</sub>SO<sub>4</sub>, filtered, and evaporated to give crude (*S*,*S*)-**7n**. The crude product was purified by silica-gel column chromatography to give (*S*,*S*)-**7n** in 90% yield with 99% ee.

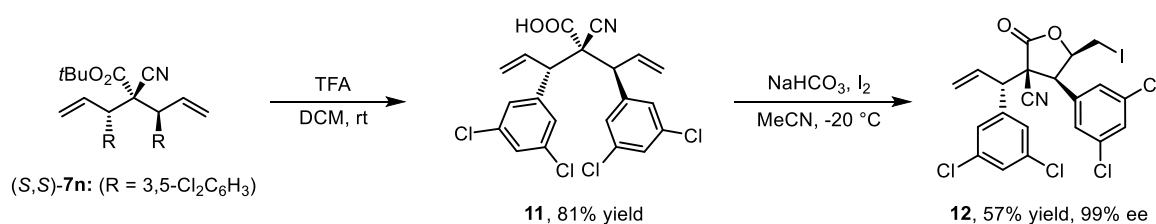

To a solution of (*S,S*)-**7n** (0.20 mmol) in DCM (2.0 mL) was added TFA (1.0 mL) under Ar<sub>2</sub> at rt and the reaction mixture was stirred for 2 h before concentrated in vacuo and purified by flash chromatography (CH<sub>2</sub>Cl<sub>2</sub> to 5% MeOH:CH<sub>2</sub>Cl<sub>2</sub>) to yield **11** (81%) as a foamy solid.

To a solution of **11** (0.10 mmol) in MeCN (1.0 mL) was added NaHCO<sub>3</sub> (0.20 mmol, 2.0 equiv.) and I<sub>2</sub> (0.30 mmol, 3.0 equiv.) under Ar<sub>2</sub> and the flask was covered with aluminum foil and the reaction mixture stirred in the dark for 5 h before being uncovered to reveal a brown precipitate. The reaction was quenched with 10% Na<sub>2</sub>S<sub>2</sub>O<sub>3</sub> and extracted with CH<sub>2</sub>Cl<sub>2</sub> (3 x 3 mL) and the combined organics were washed with 10% NaHCO<sub>3</sub> (1 x 10 mL), and brine (10 mL). The combined organics were combined and dried over Na<sub>2</sub>SO<sub>4</sub> and concentrated under vacuum and purified by silica-gel flash chromatography to yield **12**.

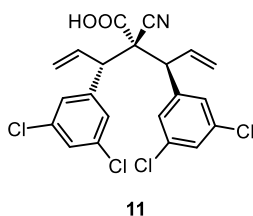

**(*S*)-2-cyano-3-(3,5-dichlorophenyl)-2-((*S*)-1-(3,5-dichlorophenyl)allyl)pent-4-enoic acid (**11**):** Yield (81%); Pale yellow foamy solid, m.p. 86–88 °C;  $[\alpha]_D^{25} = 115.71$  (*c* 0.91, CH<sub>2</sub>Cl<sub>2</sub>); <sup>1</sup>H NMR (400 MHz, Chloroform-*d*) δ 7.30 (dt, *J* = 16.8, 1.7 Hz, 2H), 7.22 (dd, *J* = 19.6, 1.9 Hz, 4H), 6.79 (bs, 1H), 6.35 (ddd, *J* = 16.9, 10.1, 9.6 Hz, 1H), 6.10 (ddd, *J* = 16.8, 10.0, 9.8 Hz, 1H), 5.38 (dd, *J* = 10.1, 1.1 Hz, 1H), 5.32 (dd, *J* = 10.0, 1.2 Hz, 1H), 5.25 (d, *J* = 16.8, 1.1 Hz, 1H), 5.20 (d, *J* = 16.9, 1.2 Hz, 1H), 3.85 (d, *J* = 9.6 Hz, 1H), 3.80 (d, *J* = 9.8 Hz, 1H). <sup>13</sup>C NMR (101 MHz, Chloroform-*d*) δ 169.2, 141.1, 140.6, 135.3, 135.2, 132.4, 132.0, 128.6, 128.4, 127.5, 127.3, 127.2, 121.8, 121.7, 58.0, 54.3, 52.2.; HRMS (ESI+) Calcd. For C<sub>21</sub>H<sub>14</sub>Cl<sub>4</sub>NNa<sub>2</sub>O<sub>2</sub> ([M+2Na-H]<sup>+</sup>): 497.9569, found: 497.9573.

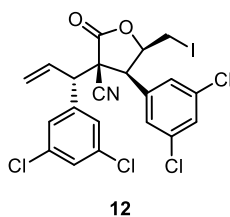

**(3*S*,4*S*,5*R*)-4-(3,5-dichlorophenyl)-3-((*S*)-1-(3,5-dichlorophenyl)allyl)-5-(iodomethyl)-2-oxotetrahyd**



**rofuran-3-carbonitrile (12):** Yield (57%); white solid, mp 232–234 °C;  $[\alpha]_D^{25} = -50.14$  (*c* 0.74, CH<sub>2</sub>Cl<sub>2</sub>); <sup>1</sup>H NMR (400 MHz, Chloroform-*d*) δ 7.45 (t, *J* = 1.8 Hz, 1H), 7.38 (t, *J* = 1.8 Hz, 1H), 7.24 (d, *J* = 1.8 Hz, 2H), 7.10 (d, *J* = 1.8 Hz, 2H), 6.30 (ddd, *J* = 16.8, 10.0, 9.3 Hz, 1H), 5.61 (d, *J* = 10.0 Hz, 1H), 5.50 (d, *J* = 16.8 Hz, 1H), 4.96 (ddd, *J* = 9.4, 5.7, 5.5 Hz, 1H), 3.95 (d, *J* = 5.5 Hz, 1H), 3.72 (d, *J* = 9.3 Hz, 1H), 3.36 (dd, *J* = 10.3, 5.7 Hz, 1H), 2.76 (dd, *J* = 10.3, 9.4 Hz, 1H). <sup>13</sup>C NMR (101 MHz, Chloroform-*d*) δ 167.2, 138.5, 136.2, 135.7, 134.9, 132.5, 130.1, 129.3, 126.9, 122.9, 114.0, 80.1, 57.1, 52.9, 52.7, -1.3.; HRMS (ESI+) Calcd. For C<sub>21</sub>H<sub>14</sub>Cl<sub>4</sub>INNaO<sub>2</sub><sup>+</sup> ([M+Na]<sup>+</sup>): 601.8716, found: 601.8692. The product was analyzed by HPLC to determine the enantiomeric excess: 99% ee (Chiralpak ID, *i*-propanol/hexane = 20/80, flow rate 1.0 mL/min, λ = 210 nm); t<sub>r</sub> = 6.00 and 8.41 min.

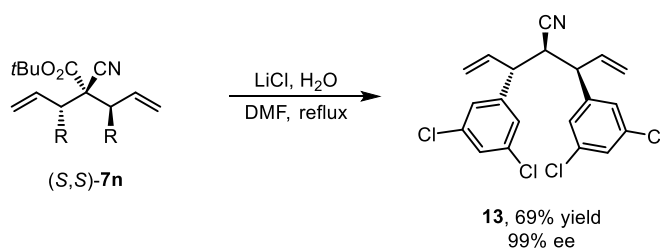

A flame dried Schlenk tube was cooled to rt and evacuated and backfilled with argon for three times. To this Schlenk tube were added [Ir(COD)Cl]<sub>2</sub> (0.01 mmol, 5 mol %), bis(diphenylphosphino)methane (dppm) (10 mol %) and anhydrous DCM (2 mL), and the reaction mixture was stirred for 30 min. After that, (*S,S*)-**7n** (0.20 mmol) was added in one portion under Ar<sub>2</sub>. Then 4,4,5,5-tetramethyl-1,3,2-dioxaborolane (HBpin, 1.0 mmol) was added at room temperature, and the resulting solution was stirred overnight. The reaction mixture was quenched with MeOH (1 mL) and concentrated under reduced pressure. The residue was purified by silica-gel column chromatography to afford the product **13**.

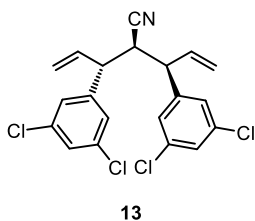

**(R)-3-(3,5-dichlorophenyl)-2-((R)-1-(3,5-dichlorophenyl)allyl)pent-4-enitrile (13):** Yield (69%);

Pale yellow liquid;  $[\alpha]_D^{25} = -62.25$  ( $c$  0.89,  $\text{CH}_2\text{Cl}_2$ );  $^1\text{H}$  NMR (400 MHz, Chloroform- $d$ )  $\delta$  7.31 (q,  $J = 1.9$  Hz, 2H), 7.12 (dd,  $J = 8.4, 1.8$  Hz, 4H), 6.11 (ddd,  $J = 16.9, 10.2, 9.0$  Hz, 1H), 5.90 (ddd,  $J = 16.9, 10.2, 8.6$  Hz, 1H), 5.42 (dd,  $J = 10.2, 1.3$  Hz, 1H), 5.33 (dd,  $J = 10.2, 1.5$  Hz, 1H), 5.25 (dd,  $J = 16.9, 1.5$  Hz, 1H), 5.24 (dd,  $J = 16.9, 1.3$  Hz, 1H), 3.54 (dd,  $J = 9.2, 5.4$  Hz, 1H), 3.41 (dd,  $J = 9.3, 8.6$  Hz, 1H), 3.12 (dd,  $J = 9.3, 5.4$  Hz, 1H).  $^{13}\text{C}$  NMR (101 MHz, Chloroform- $d$ )  $\delta$  143.2, 142.4, 135.9, 135.64, 135.55, 133.8, 128.2, 128.0, 126.5, 126.2, 121.0, 119.8, 117.9, 49.5, 48.0, 42.8.; HRMS (ESI+) Calcd. For  $\text{C}_{20}\text{H}_{15}\text{Cl}_4\text{NNa}^+$  ( $[\text{M}+\text{Na}]^+$ ): 431.9851, found: 431.9860. The product was analyzed by HPLC to determine the enantiomeric excess: 99% ee (Chiralpak IE,  $i$ -propanol/hexane = 5/95, flow rate 1.0 mL/min,  $\lambda = 220$  nm);  $t_r = 6.13$  and 6.45 min.

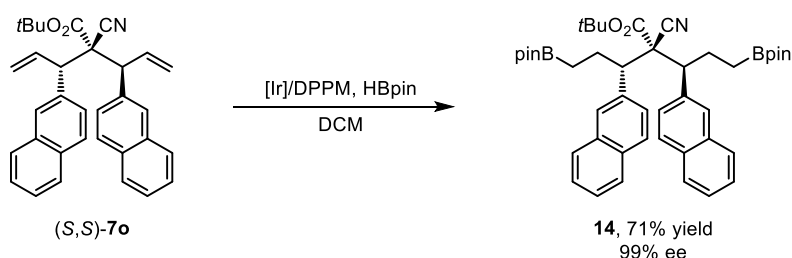

A flame dried Schlenk tube was cooled to rt and evacuated and backfilled with argon for three times. To this Schlenk tube were added  $[\text{Ir}(\text{COD})\text{Cl}]_2$  (0.01 mmol, 5 mol %), bis(diphenylphosphino)methane (dppm) (10 mol %) and anhydrous DCM (2 mL), and the reaction mixture was stirred for 30 min. After that, (S,S)-**7o** (0.20 mmol) was added in one portion under  $\text{Ar}_2$ . Then 4,4,5,5-tetramethyl-1,3,2-dioxaborolane (HBpin, 1.0 mmol) was added at room temperature, and the resulting solution was stirred overnight. The reaction mixture was quenched with MeOH (1 mL) and concentrated under reduced pressure. The residue was purified by fast silica-gel (inactivated by  $\text{Et}_3\text{N}$ ) column chromatography to afford the product **14**.

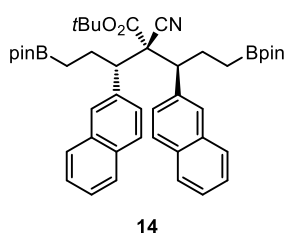

**tert-butyl (S)-2-cyano-3-(naphthalen-2-yl)-2-((S)-1-(naphthalen-2-yl)-3-(4,4,5,5-tetramethyl-1,3,2-dioxaborolan-2-yl)propyl)-5-(4,4,5,5-tetramethyl-1,3,2-dioxaborolan-2-yl)pentanoate (14):** Yield (71%); white solid, mp 92–95 °C;  $[\alpha]_D^{25} = 30.13$  ( $c$  0.76,  $\text{CH}_2\text{Cl}_2$ );  $^1\text{H}$  NMR (400 MHz, Chloroform-*d*)  $\delta$  7.84 – 7.79 (m, 4H), 7.77 – 7.68 (m, 4H), 7.60 – 7.50 (m, 2H), 7.46 – 7.40 (m, 4H), 3.49 (dd,  $J = 12.1$ , 3.2 Hz, 1H), 3.33 (dd,  $J = 12.0$ , 2.9 Hz, 1H), 2.48 – 2.32 (m, 1H), 2.11 – 2.03 (m, 1H), 1.91 – 1.70 (m, 1H), 1.59 – 1.44 (m, 1H), 1.18 (s, 6H), 1.18 (s, 6H), 1.02 (s, 6H), 1.00 (s, 6H), 0.89 (s, 9H), 0.67 – 0.58 (m, 1H), 0.53 – 0.45 (m, 1H), 0.42 – 0.33 (m, 1H), 0.28 – 0.18 (m, 1H).  $^{13}\text{C}$  NMR (101 MHz, Chloroform-*d*)  $\delta$  166.7, 136.7, 135.7, 133.3, 133.04, 133.03, 132.7, 129.0, 128.2, 128.0, 127.8, 127.6, 127.5, 127.3, 127.21, 127.19, 125.9, 125.8, 125.74, 125.71, 125.6, 119.1, 83.3, 82.9, 82.7, 60.4, 53.6, 52.0, 27.0, 25.7, 24.82, 24.77, 24.6, 24.5, 9.0.; HRMS (ESI+) Calcd. For  $\text{C}_{45}\text{H}_{57}\text{B}_2\text{NNaO}_6^+$  ( $[\text{M}+\text{Na}]^+$ ): 752.4264, found: 752.4269. The product was analyzed by HPLC to determine the enantiomeric excess: 99% ee (Chiralpak IE, *i*-propanol/hexane = 5/95, flow rate 1.0 mL/min,  $\lambda = 220$  nm);  $t_r = 13.08$  and 18.84 min.

## IX. References

1. a) B. M. Trost, J. R. Miller, Jr. C. M. Hoffman, *J. Am. Chem. Soc.* **2011**, *133*, 8165; b) M. Yasumoto, H. Ueki, V. A. Soloshonok, *J. Fluorine Chem.* **2007**, *128*, 736; c) K. Morisaki, Y. Kondo, M. Sawa, H. Morimoto, T. Ohshima, *Chem. Pharm. Bull.* **2017**, *65*, 1089; d) L.-M. Shi, X.-S. Sun, C. Shen, Z.-F. Wang, H.-Y. Tao, C.-J. Wang, *Org. Lett.* **2019**, *21*, 4842.
2. a) C. R. Smith, D. J. Mans, T. V. Rajanbabu, *Org. Synth.* **2008**, *85*, 238. b) K. Tissot-Croset, D. Polet, S. Gille, C. Hawner, A. Alexakis, *Synthesis*, **2004**, 2586.

# X. NMR and HPLC Data

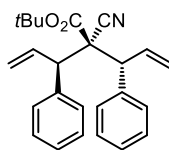

7a

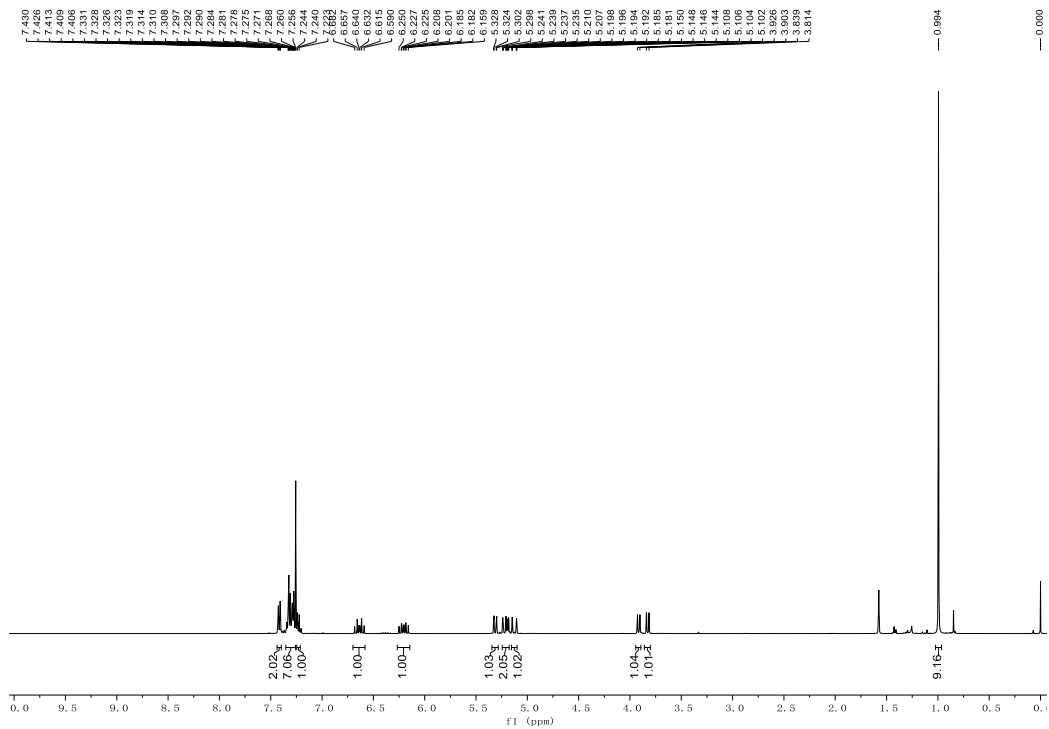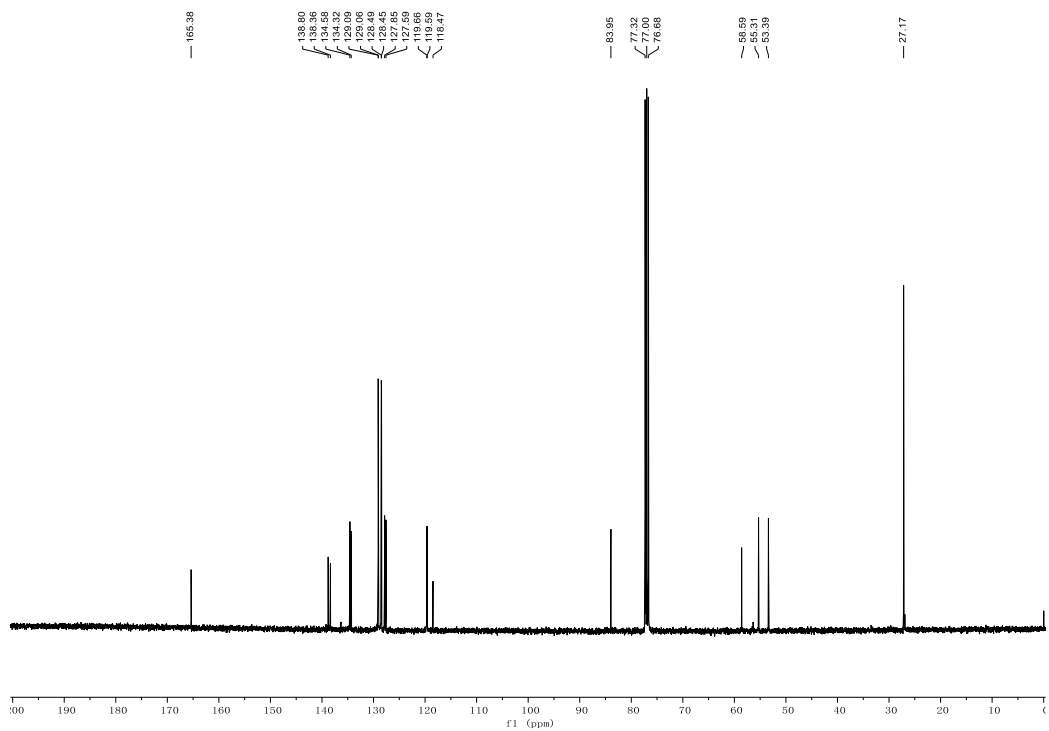

```

=====
Acq. Operator   : SYSTEM                      Seq. Line :    1
Acq. Instrument : 1260                        Location  :   84
Injection Date  : 6/27/2020 9:10:14 PM       Inj       :    1
                                           Inj Volume: 2.000 µl
Acq. Method     : E:\DATA\SC\SC-13-25\SC-13-25 2020-06-27 21-08-56\SC-4-IE-98-2-DAD-1ML-20MIN
                  -2UL.M
Last changed    : 6/27/2020 9:24:39 PM by SYSTEM
                  (modified after loading)
Analysis Method : E:\DATA\SC\SC-13-25\SC-13-25 2020-06-27 21-08-56\SC-4-IE-98-2-DAD-1ML-20MIN
                  -2UL.M (Sequence Method)
Last changed    : 3/23/2021 11:53:56 AM by SYSTEM
                  (modified after loading)
Additional Info : Peak(s) manually integrated
  
```

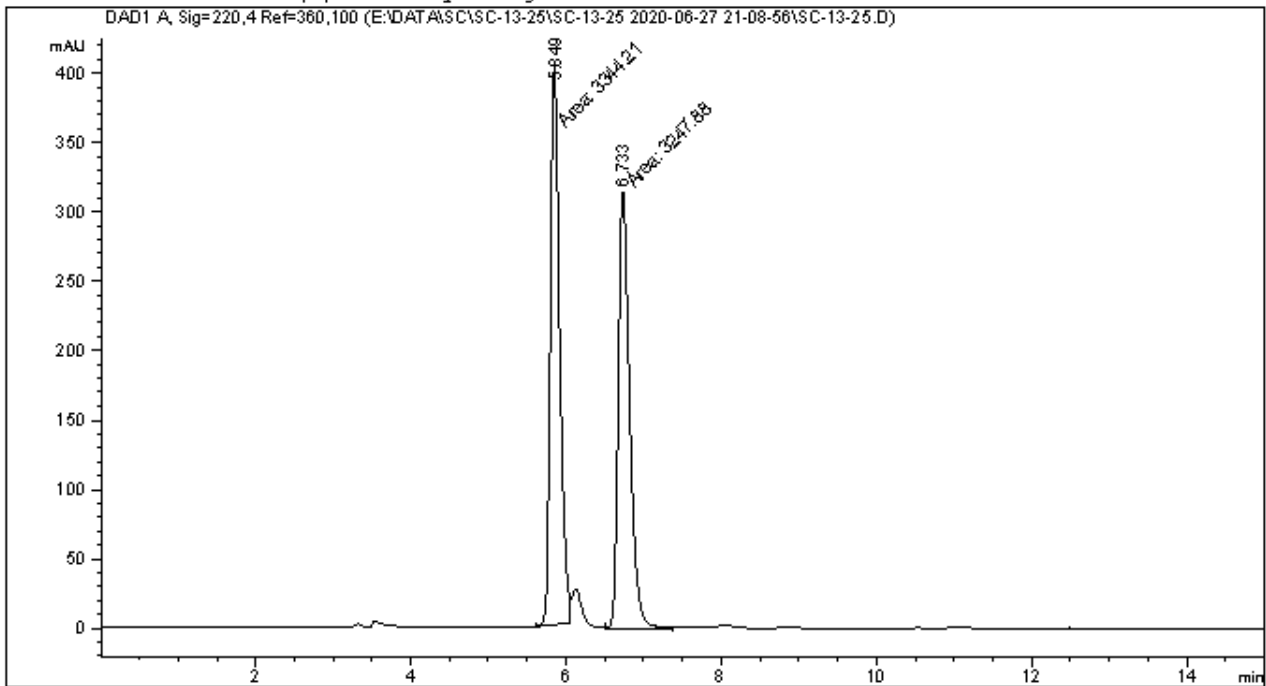

=====  
 Area Percent Report  
 =====

```

Sorted By      :      Signal
Multiplier     :      1.0000
Dilution       :      1.0000
Do not use Multiplier & Dilution Factor with ISTDs
  
```

Signal 1: DAD1 A, Sig=220,4 Ref=360,100

| Peak # | RetTime [min] | Type | Width [min] | Area [mAU*s] | Height [mAU] | Area %  |
|--------|---------------|------|-------------|--------------|--------------|---------|
| 1      | 5.849         | MM   | 0.1381      | 3344.21045   | 403.53159    | 50.7307 |
| 2      | 6.733         | MM   | 0.1712      | 3247.87988   | 316.19644    | 49.2693 |

Totals :                    6592.09033   719.72803

```

=====
Acq. Operator   : SYSTEM                      Seq. Line :    3
Acq. Instrument : 1260                       Location  :   86
Injection Date  : 6/27/2020 9:42:59 PM      Inj       :    1
                                           Inj Volume: 2.000 µl
Acq. Method    : E:\DATA\SC\SC-13-25\SC-13-25 2020-06-27 21-08-56\SC-4-IE-98-2-DAD-1ML-20MIN
                : -2UL.M
Last changed   : 6/27/2020 9:24:39 PM by SYSTEM
Analysis Method: E:\DATA\SC\SC-13-25\SC-13-25 2020-06-27 21-08-56\SC-4-IE-98-2-DAD-1ML-20MIN
                : -2UL.M (Sequence Method)
Last changed   : 3/23/2021 11:53:56 AM by SYSTEM
                : (modified after loading)
Additional Info : Peak(s) manually integrated
  
```

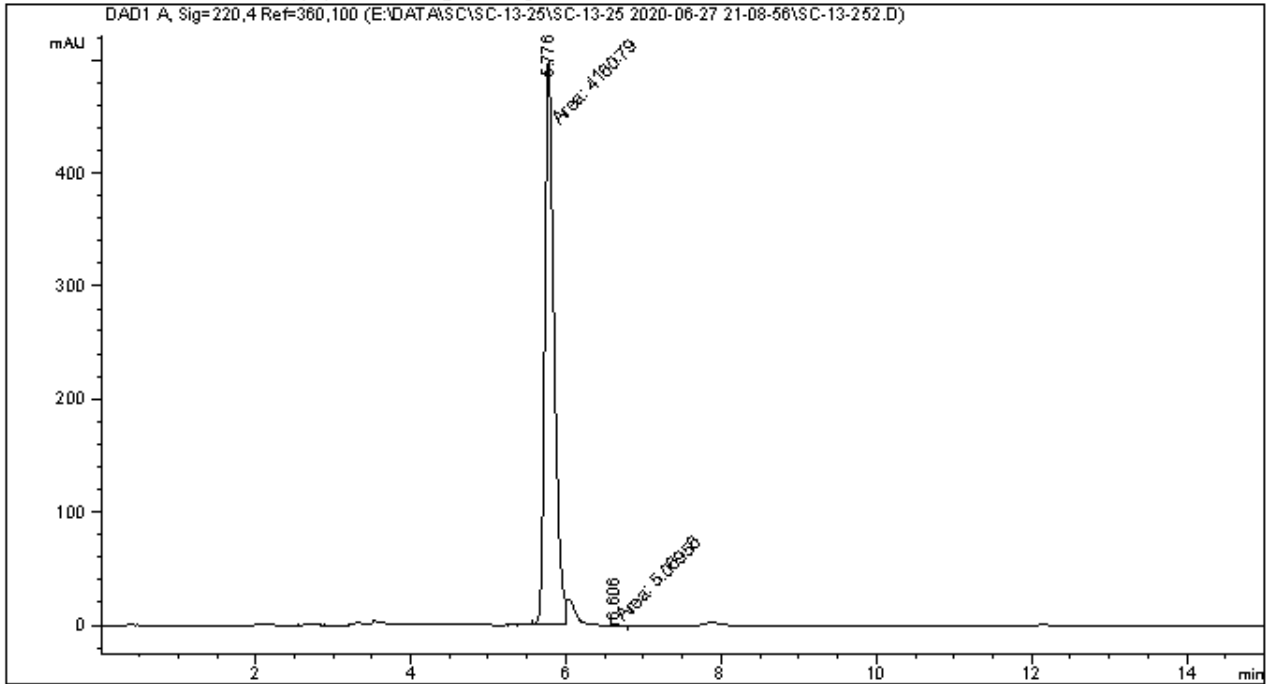

=====  
 Area Percent Report  
 =====

```

Sorted By      :      Signal
Multiplier     :      1.0000
Dilution       :      1.0000
Do not use Multiplier & Dilution Factor with ISTDs
  
```

Signal 1: DAD1 A, Sig=220,4 Ref=360,100

| Peak # | RetTime [min] | Type | Width [min] | Area [mAU*s] | Height [mAU] | Area %  |
|--------|---------------|------|-------------|--------------|--------------|---------|
| 1      | 5.776         | MM   | 0.1394      | 4160.79443   | 497.35904    | 99.8783 |
| 2      | 6.606         | MM   | 0.1536      | 5.06956      | 5.49999e-1   | 0.1217  |

Totals :                    4165.86399   497.90904

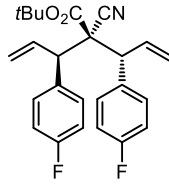

7b

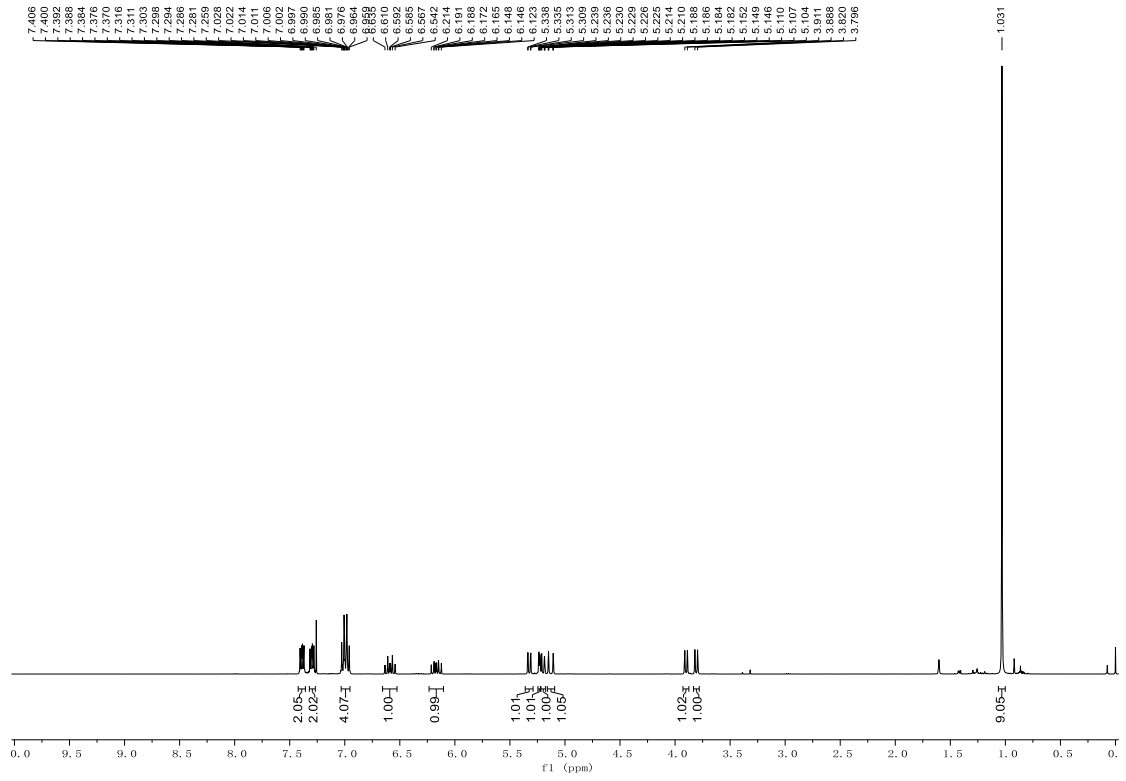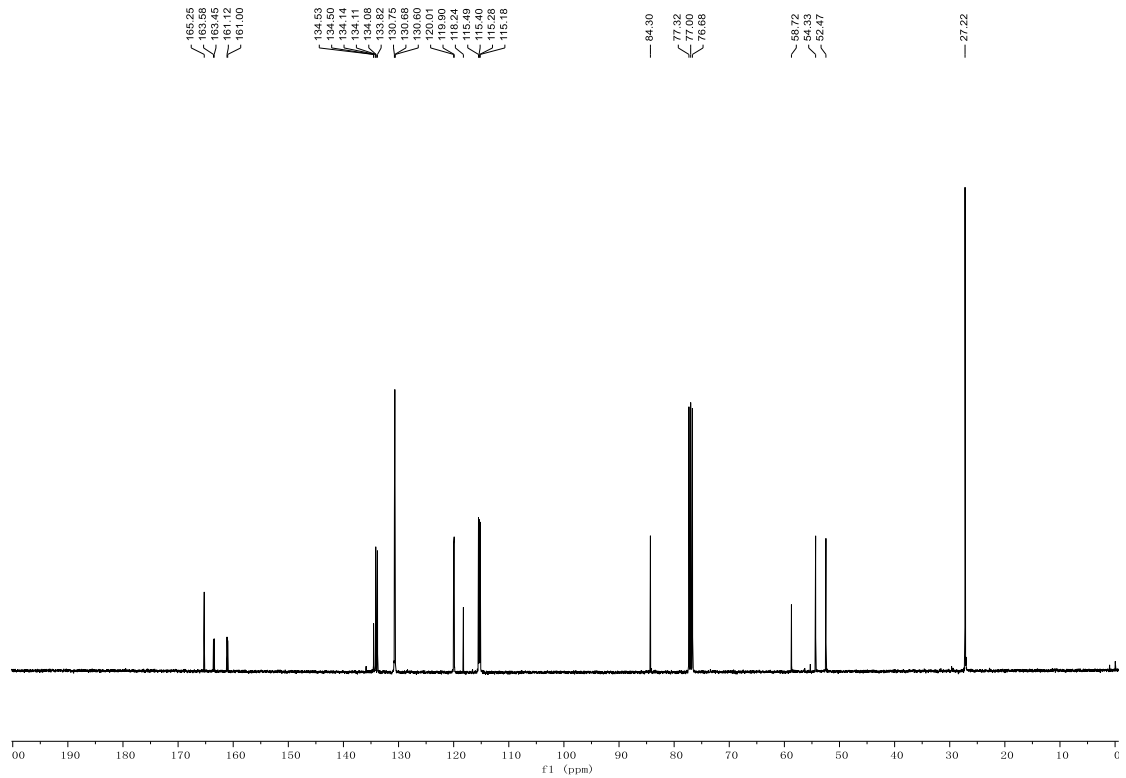

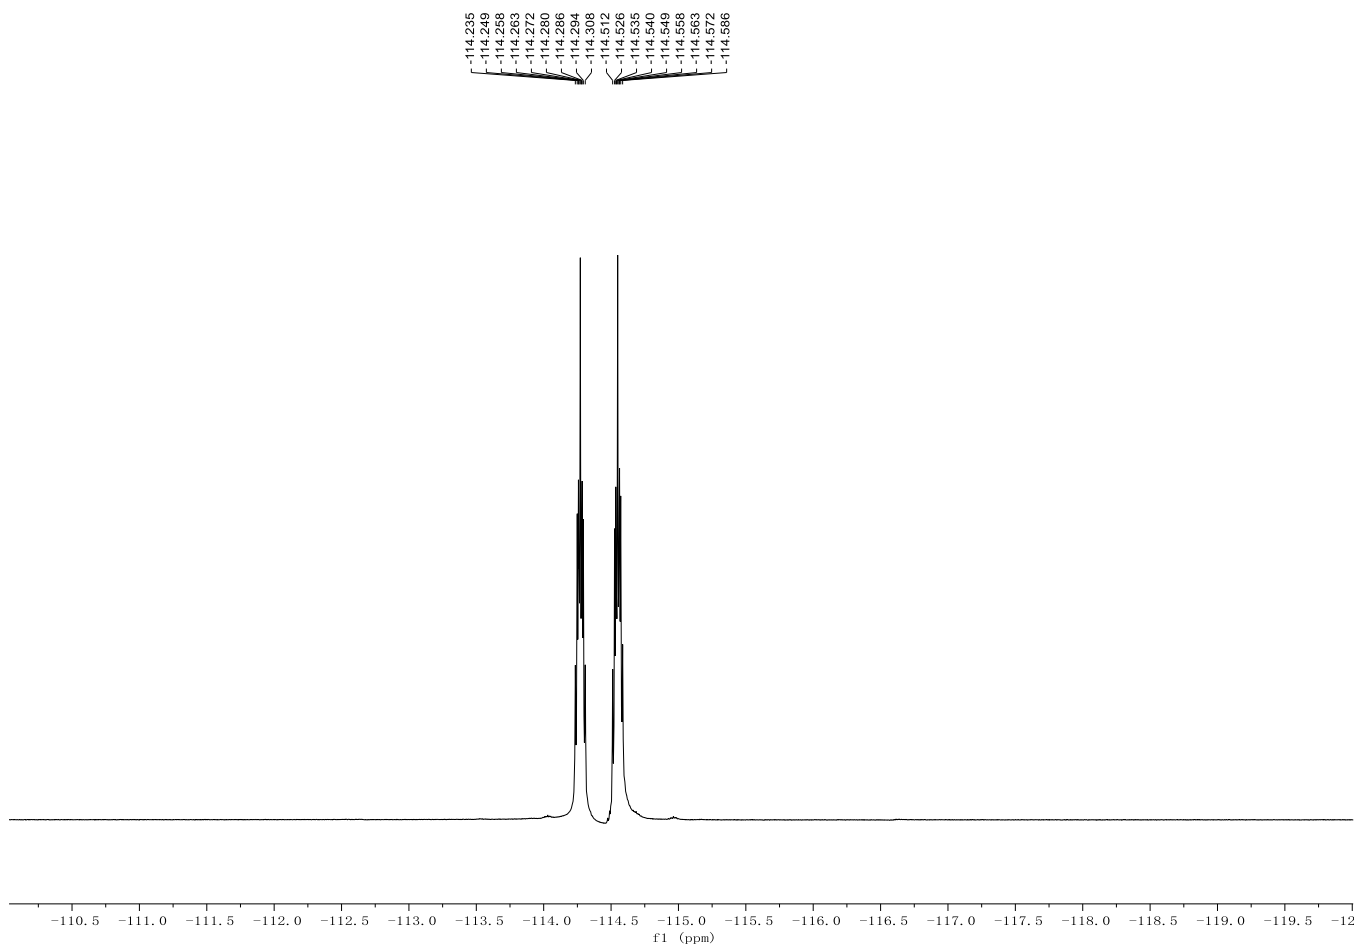



```

=====
Acq. Operator   : SYSTEM                      Seq. Line :   19
Acq. Instrument : 1260                      Location  :    85
Injection Date  : 4/6/2021 11:06:47 PM      Inj       :    1
                                           Inj Volume: 2.000 µl
Acq. Method     : E:\DATA\SC\SC-16-14-15_13-1-2-6-7-22-23 2021-04-06 18-00-44\SC-4-IE-98-2-
                  DAD-1ML-10MIN-2UL.M
Last changed    : 4/6/2021 6:00:45 PM by SYSTEM
Analysis Method : E:\DATA\SC\SC-16-14-15_13-1-2-6-7-22-23 2021-04-06 18-00-44\SC-4-IE-98-2-
                  DAD-1ML-10MIN-2UL.M (Sequence Method)
Last changed    : 4/7/2021 4:47:05 PM by SYSTEM
                  (modified after loading)
Additional Info : Peak(s) manually integrated
  
```

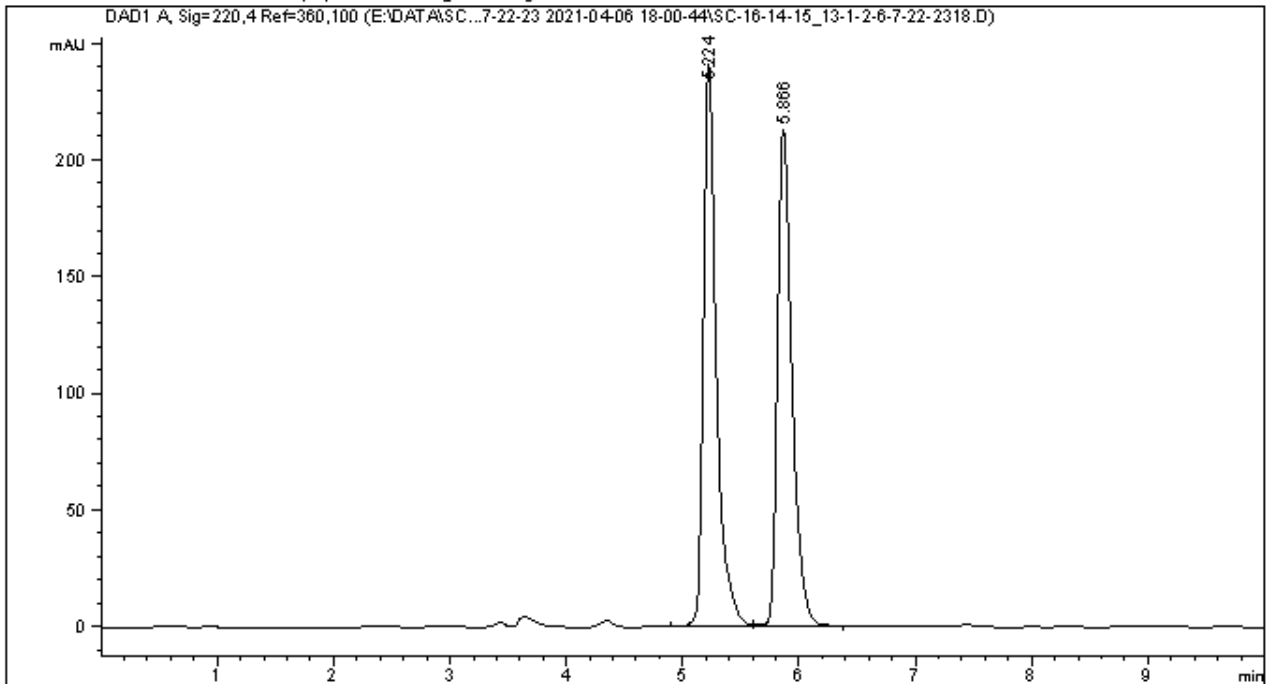

=====  
 Area Percent Report  
 =====

```

Sorted By      :      Signal
Multiplier     :      1.0000
Dilution      :      1.0000
Do not use Multiplier & Dilution Factor with ISTDs
  
```

Signal 1: DAD1 A, Sig=220,4 Ref=360,100

| Peak # | RetTime [min] | Type | Width [min] | Area [mAU*s] | Height [mAU] | Area %  |
|--------|---------------|------|-------------|--------------|--------------|---------|
| 1      | 5.224         | BV   | 0.1150      | 1859.65515   | 240.99290    | 50.2046 |
| 2      | 5.866         | VB   | 0.1298      | 1844.49805   | 213.43655    | 49.7954 |

Totals :                            3704.15320    454.42946

```

=====
Acq. Operator   : SYSTEM                      Seq. Line :    7
Acq. Instrument : 1260                       Location  :   86
Injection Date  : 4/6/2021 7:09:34 PM       Inj       :    1
                                           Inj Volume: 2.000 µl
Acq. Method     : E:\DATA\SC\SC-16-14-15_13-1-2-6-7-22-23 2021-04-06 18-00-44\SC-4-IE-98-2-
                  DAD-1ML-10MIN-2UL.M
Last changed    : 4/6/2021 6:00:45 PM by SYSTEM
Analysis Method : E:\DATA\SC\SC-16-14-15_13-1-2-6-7-22-23 2021-04-06 18-00-44\SC-4-IE-98-2-
                  DAD-1ML-10MIN-2UL.M (Sequence Method)
Last changed    : 4/7/2021 4:47:05 PM by SYSTEM
                  (modified after loading)
Additional Info : Peak(s) manually integrated
  
```

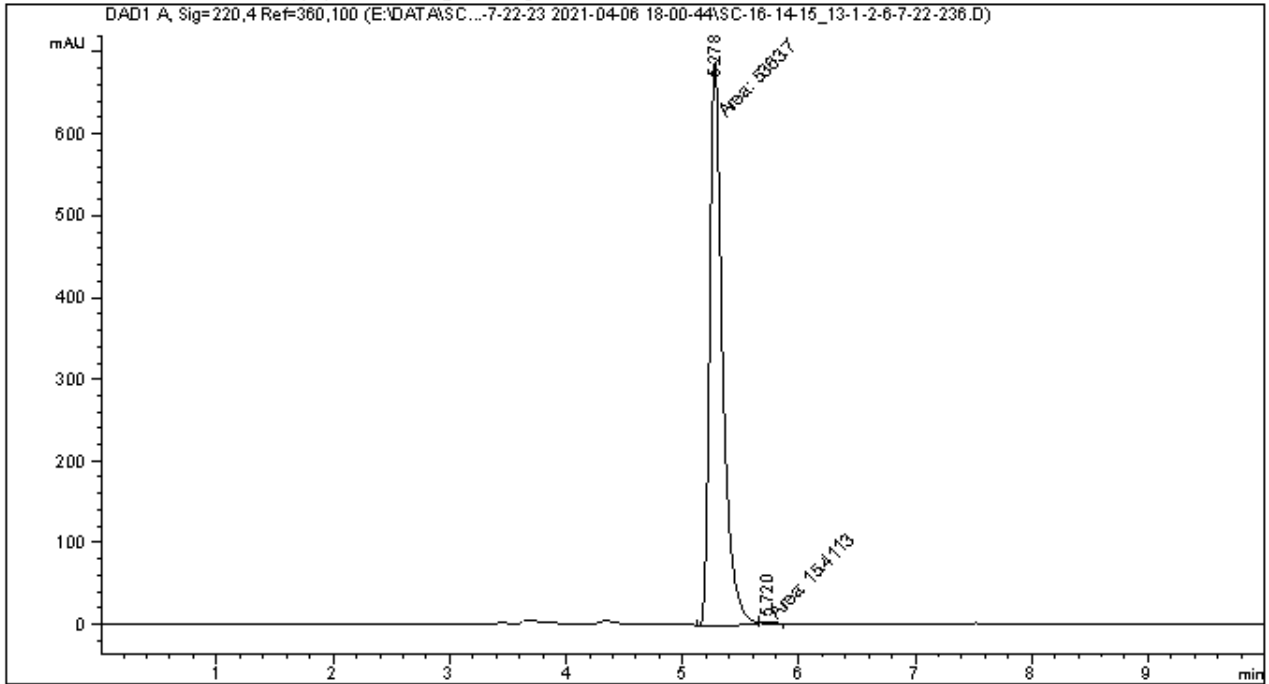

=====  
 Area Percent Report  
 =====

```

Sorted By      :      Signal
Multiplier     :      1.0000
Dilution       :      1.0000
Do not use Multiplier & Dilution Factor with ISTDs
  
```

Signal 1: DAD1 A, Sig=220,4 Ref=360,100

| Peak # | RetTime [min] | Type | Width [min] | Area [mAU*s] | Height [mAU] | Area %  |
|--------|---------------|------|-------------|--------------|--------------|---------|
| 1      | 5.278         | MF   | 0.1298      | 5363.69922   | 688.66479    | 99.7135 |
| 2      | 5.720         | MM   | 0.1314      | 15.41134     | 1.95500      | 0.2865  |

Totals :                                    5379.11056   690.61980

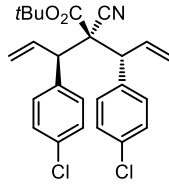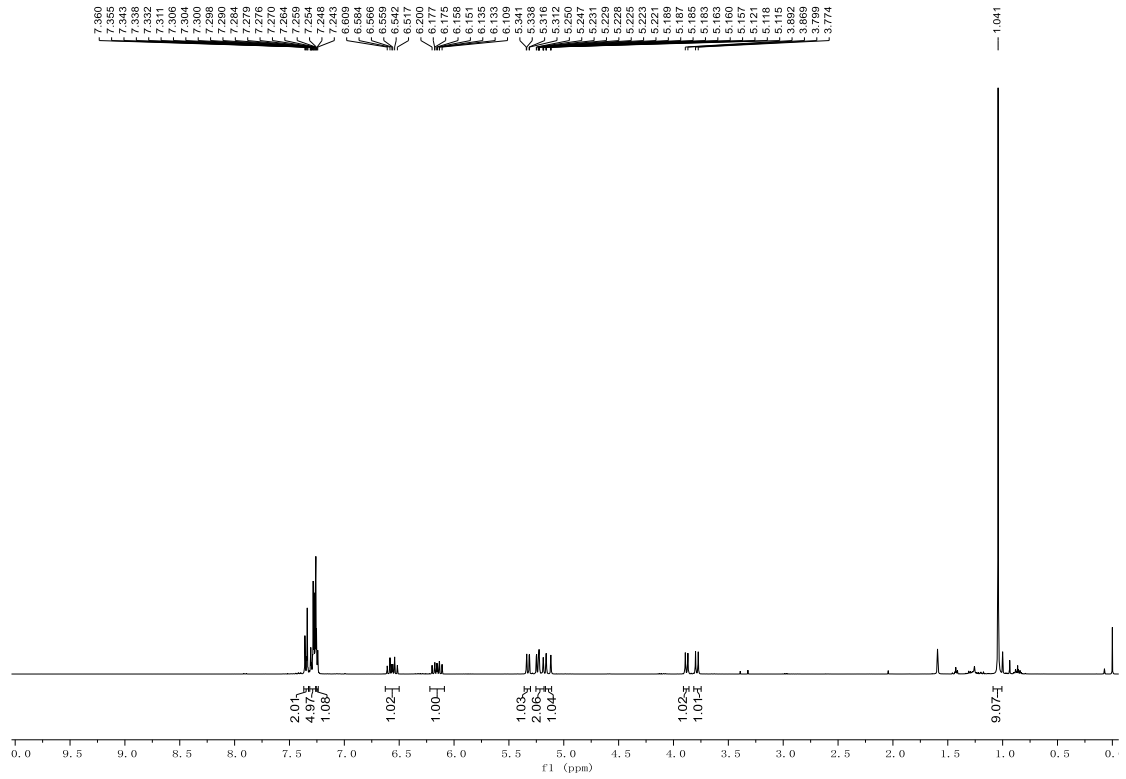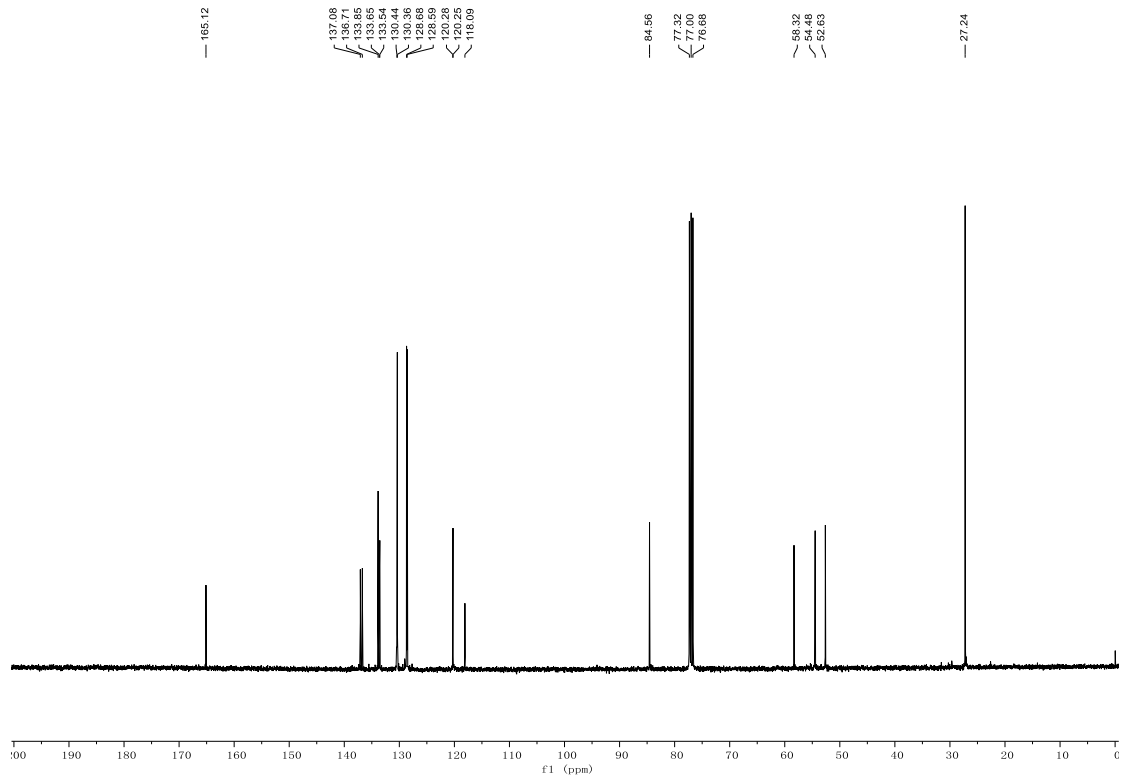

```

=====
Acq. Operator   : SYSTEM                      Seq. Line :    4
Acq. Instrument : 1260                        Location  :   63
Injection Date  : 4/7/2021 10:44:29 AM       Inj       :    1
                                           Inj Volume: 2.000 µl
Acq. Method     : E:\DATA\SC\SC-16-14-15_13-1-2-6-7-22-23\SC-13-7-22 2021-04-07 10-09-15\SC-3
                  -ID-98-2-DAD-1ML-10MIN.M
Last changed    : 4/7/2021 10:09:15 AM by SYSTEM
Analysis Method : E:\DATA\SC\SC-16-14-15_13-1-2-6-7-22-23\SC-13-7-22 2021-04-07 10-09-15\SC-3
                  -ID-98-2-DAD-1ML-10MIN.M (Sequence Method)
Last changed    : 4/7/2021 5:07:59 PM by SYSTEM
                  (modified after loading)
Additional Info : Peak(s) manually integrated
  
```

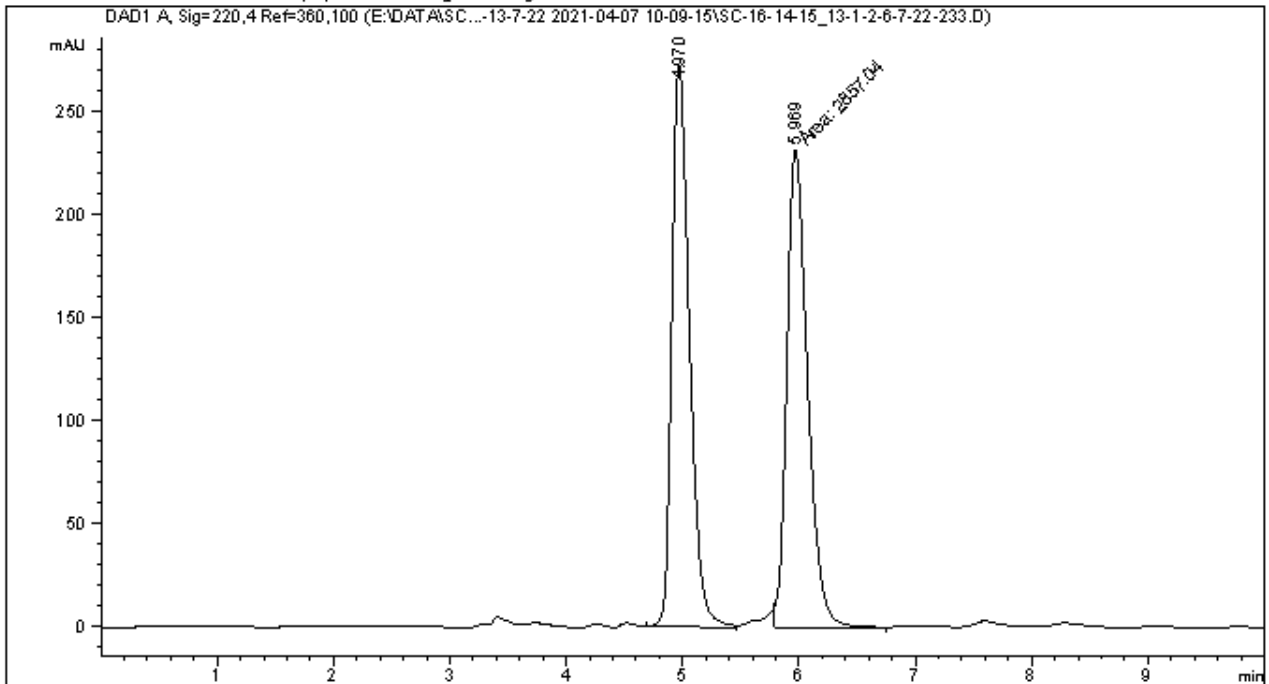

=====  
 Area Percent Report  
 =====

```

Sorted By      :      Signal
Multiplier     :      1.0000
Dilution       :      1.0000
Do not use Multiplier & Dilution Factor with ISTDs
  
```

Signal 1: DAD1 A, Sig=220,4 Ref=360,100

| Peak # | RetTime [min] | Type | Width [min] | Area [mAU*s] | Height [mAU] | Area %  |
|--------|---------------|------|-------------|--------------|--------------|---------|
| 1      | 4.970         | BV   | 0.1605      | 2866.67163   | 273.07132    | 50.0842 |
| 2      | 5.969         | FM   | 0.2053      | 2857.03687   | 231.89261    | 49.9158 |

Totals :                    5723.70850   504.96393

```

=====
Acq. Operator   : SYSTEM                      Seq. Line :   26
Acq. Instrument : 1260                      Location  :   66
Injection Date  : 4/7/2021 1:05:46 AM       Inj       :    1
                                           Inj Volume: 2.000 µl
Acq. Method     : E:\DATA\SC\SC-16-14-15_13-1-2-6-7-22-23 2021-04-06 18-00-44\SC-3-ID-98-2-
                  DAD-1ML-10MIN.M
Last changed    : 4/6/2021 8:42:31 PM by SYSTEM
Analysis Method : E:\DATA\SC\SC-16-14-15_13-1-2-6-7-22-23 2021-04-06 18-00-44\SC-3-ID-98-2-
                  DAD-1ML-10MIN.M (Sequence Method)
Last changed    : 4/7/2021 5:11:48 PM by SYSTEM
                  (modified after loading)
Additional Info : Peak(s) manually integrated
  
```

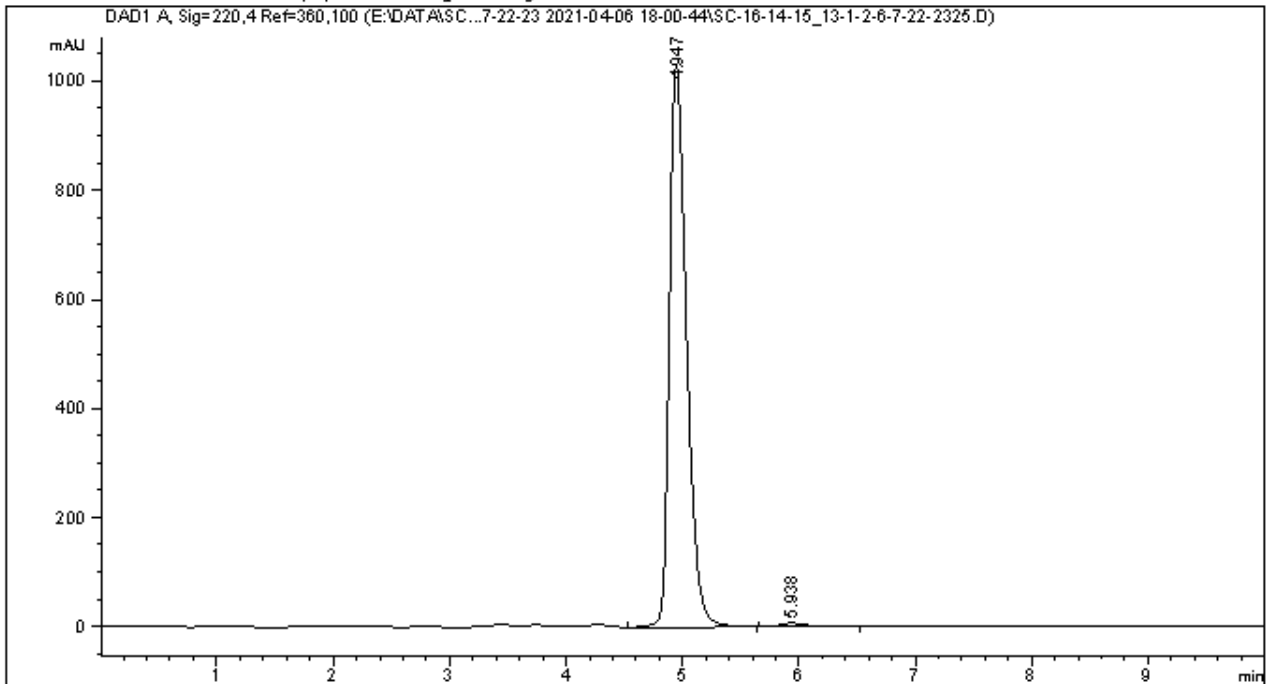

=====  
 Area Percent Report  
 =====

```

Sorted By      :      Signal
Multiplier     :      1.0000
Dilution       :      1.0000
Do not use Multiplier & Dilution Factor with ISTDs
  
```

Signal 1: DAD1 A, Sig=220,4 Ref=360,100

| Peak # | RetTime [min] | Type | Width [min] | Area [mAU*s] | Height [mAU] | Area %  |
|--------|---------------|------|-------------|--------------|--------------|---------|
| 1      | 4.947         | BB   | 0.1561      | 1.05210e4    | 1030.69934   | 99.1167 |
| 2      | 5.938         | BB   | 0.1999      | 93.76121     | 6.67556      | 0.8833  |

Totals :                    1.06148e4  1037.37490

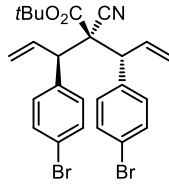

7d

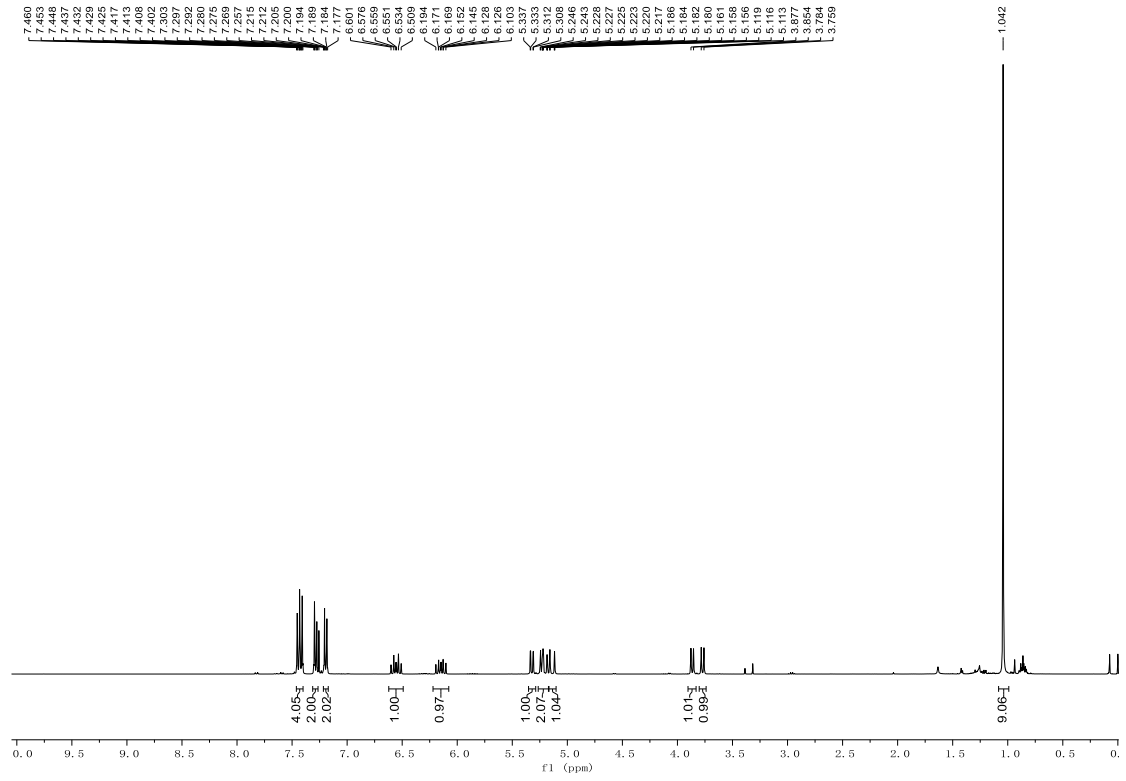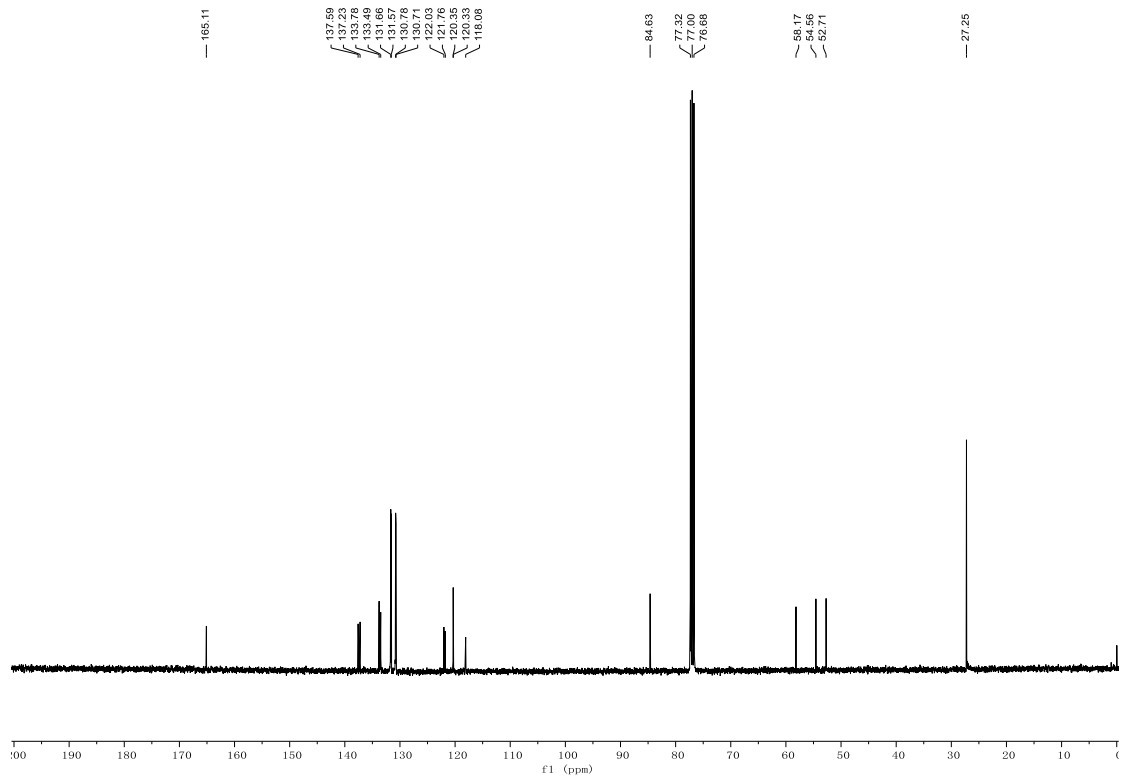

```

=====
Acq. Operator   : SYSTEM                      Seq. Line :   17
Acq. Instrument : 1260                      Location  :    86
Injection Date  : 4/6/2021 10:24:04 PM      Inj       :    1
                                           Inj Volume: 2.000 µl
Acq. Method     : E:\DATA\SC\SC-16-14-15_13-1-2-6-7-22-23 2021-04-06 18-00-44\SC-4-IE-98-2-
                  DAD-1ML-10MIN-2UL.M
Last changed    : 4/6/2021 6:00:45 PM by SYSTEM
Analysis Method : E:\DATA\SC\SC-16-14-15_13-1-2-6-7-22-23 2021-04-06 18-00-44\SC-4-IE-98-2-
                  DAD-1ML-10MIN-2UL.M (Sequence Method)
Last changed    : 4/7/2021 4:47:05 PM by SYSTEM
                  (modified after loading)
Additional Info : Peak(s) manually integrated
  
```

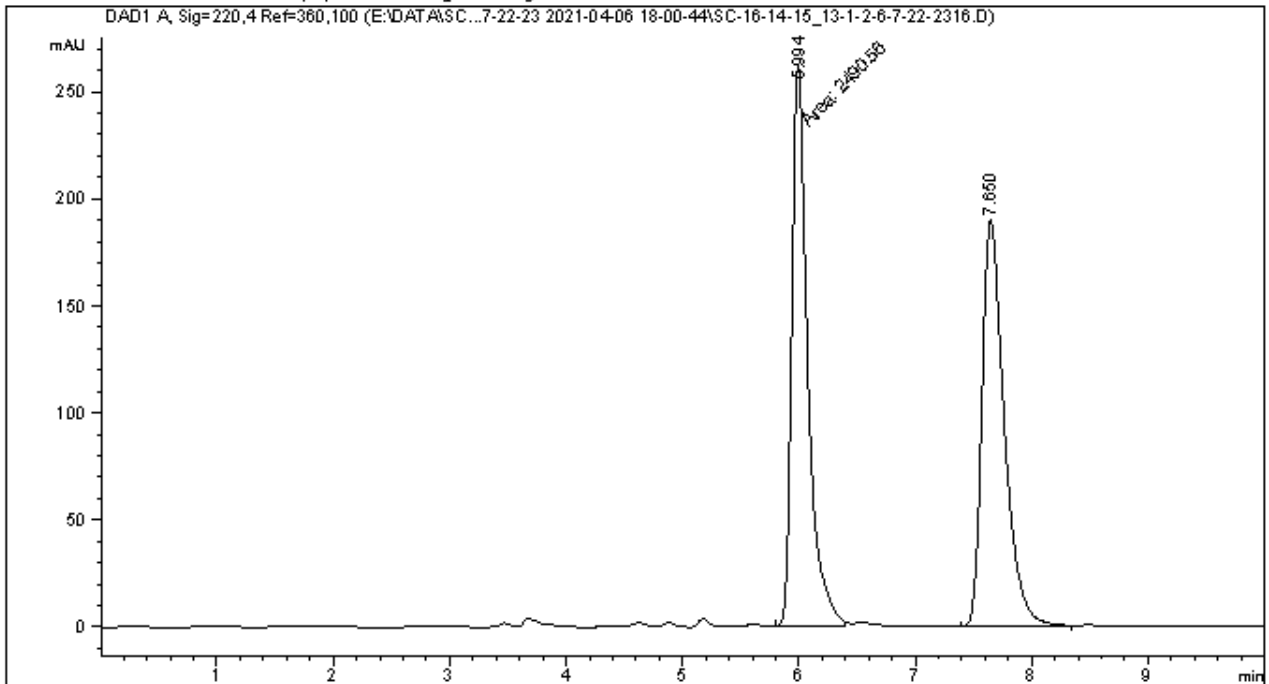

=====  
 Area Percent Report  
 =====

```

Sorted By      :      Signal
Multiplier     :      1.0000
Dilution       :      1.0000
Do not use Multiplier & Dilution Factor with ISTDs
  
```

Signal 1: DAD1 A, Sig=220,4 Ref=360,100

| Peak # | RetTime [min] | Type | Width [min] | Area [mAU*s] | Height [mAU] | Area %  |
|--------|---------------|------|-------------|--------------|--------------|---------|
| 1      | 5.994         | MF   | 0.1583      | 2490.56177   | 262.17987    | 49.7241 |
| 2      | 7.650         | BB   | 0.2001      | 2518.20166   | 189.42445    | 50.2759 |

Totals :                      5008.76343    451.60432

```

=====
Acq. Operator   : SYSTEM                      Seq. Line :    9
Acq. Instrument : 1260                      Location  :   88
Injection Date  : 4/6/2021 7:32:29 PM       Inj       :    1
                                           Inj Volume: 2.000 µl
Acq. Method    : E:\DATA\SC\SC-16-14-15_13-1-2-6-7-22-23 2021-04-06 18-00-44\SC-4-IE-98-2-
                DAD-1ML-10MIN-2UL.M
Last changed   : 4/6/2021 6:00:45 PM by SYSTEM
Analysis Method: E:\DATA\SC\SC-16-14-15_13-1-2-6-7-22-23 2021-04-06 18-00-44\SC-4-IE-98-2-
                DAD-1ML-10MIN-2UL.M (Sequence Method)
Last changed   : 4/7/2021 4:47:05 PM by SYSTEM
                (modified after loading)
Additional Info : Peak(s) manually integrated
  
```

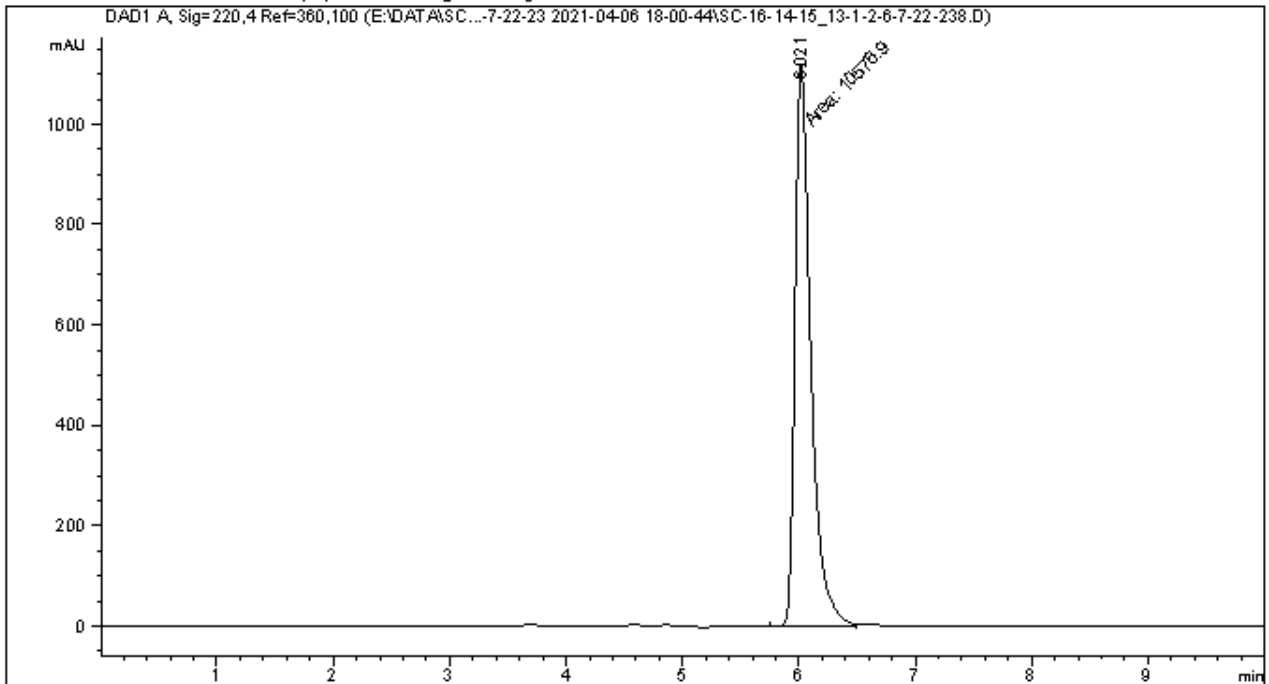

=====  
 Area Percent Report  
 =====

```

Sorted By      :      Signal
Multiplier     :      1.0000
Dilution      :      1.0000
Do not use Multiplier & Dilution Factor with ISTDs
  
```

Signal 1: DAD1 A, Sig=220,4 Ref=360,100

| Peak # | RetTime [min] | Type | Width [min] | Area [mAU*s] | Height [mAU] | Area %   |
|--------|---------------|------|-------------|--------------|--------------|----------|
| 1      | 6.021         | MF   | 0.1576      | 1.05769e4    | 1118.70166   | 100.0000 |

Totals :                    1.05769e4  1118.70166



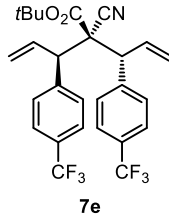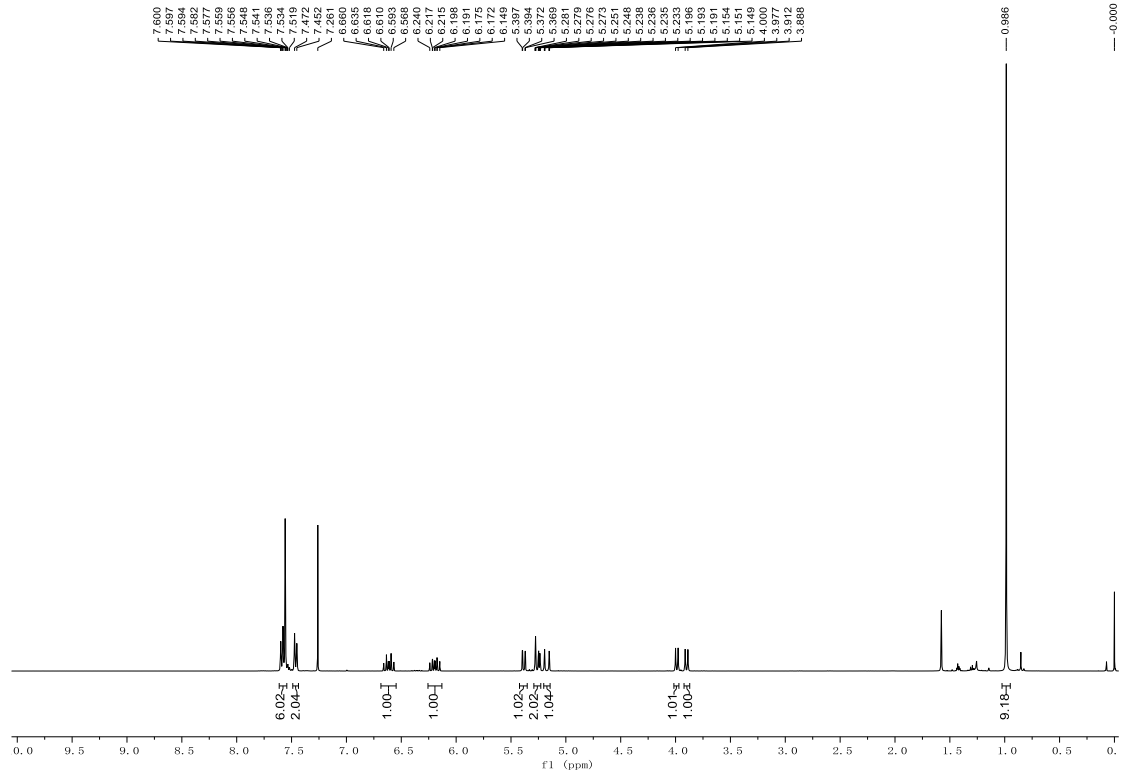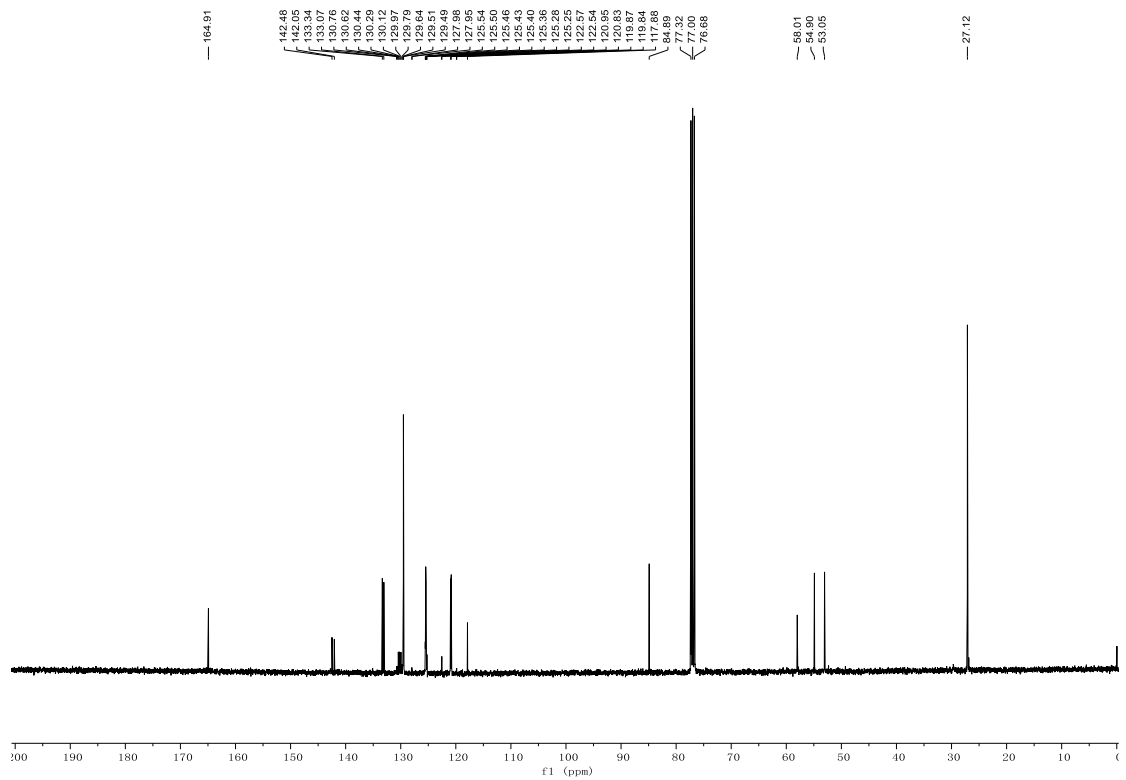

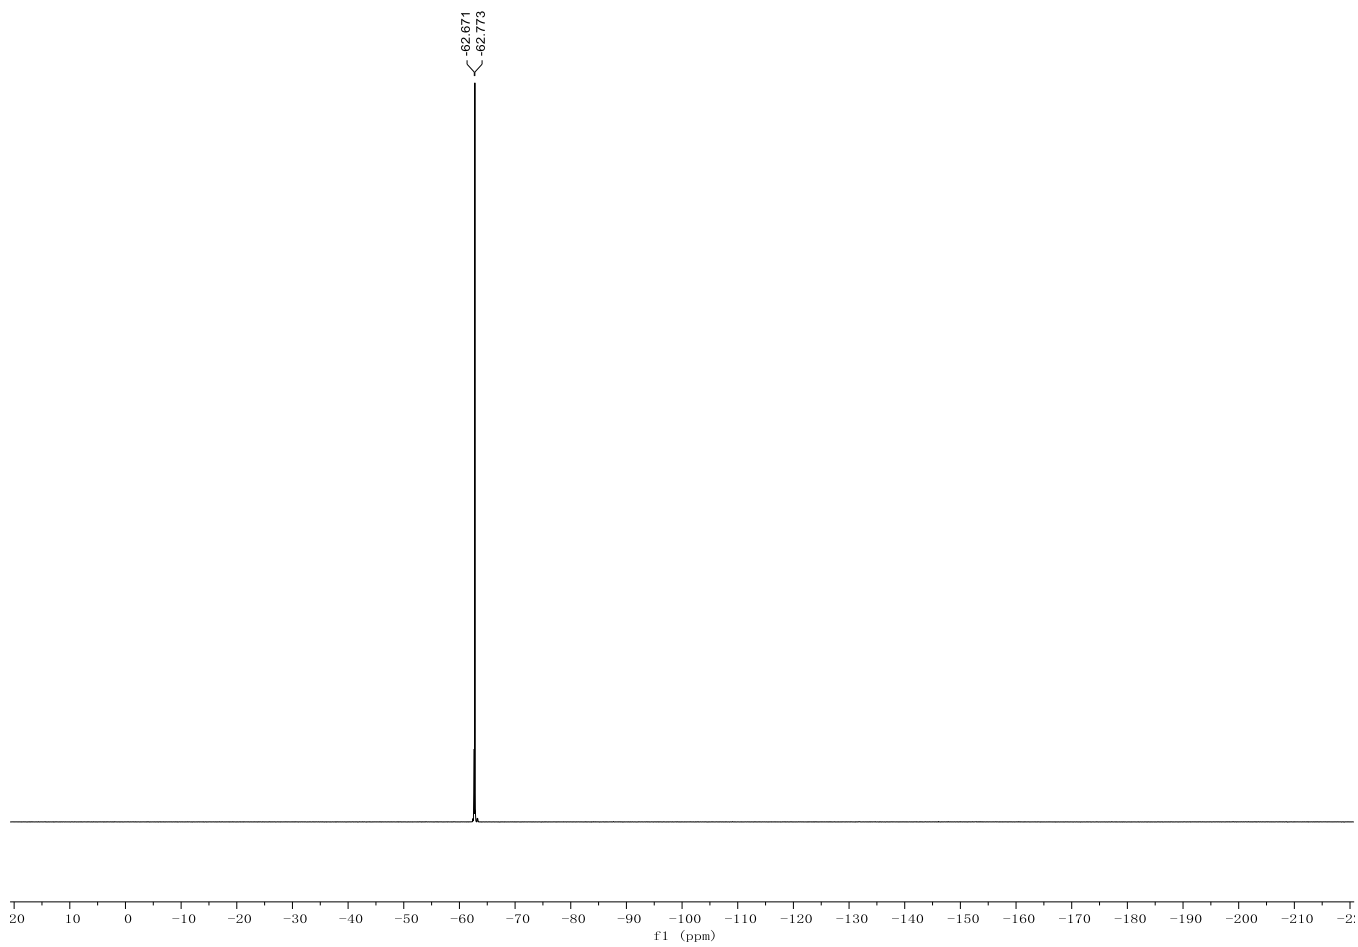

```

=====
Acq. Operator   : SYSTEM                      Seq. Line :    2
Acq. Instrument : 1260                        Location  :   61
Injection Date  : 4/7/2021 12:24:54 PM      Inj       :    1
                                           Inj Volume: 2.000 µl
Acq. Method    : E:\DATA\SC\SC-16-14-15_13-1-2-6-7-22-23\SC-13-22_16-17 2021-04-07 12-12-43
                  \SC-4-IE-98-2-DAD-1ML-10MIN-2UL.M
Last changed   : 4/7/2021 12:12:43 PM by SYSTEM
Analysis Method: E:\DATA\SC\SC-16-14-15_13-1-2-6-7-22-23\SC-13-22_16-17 2021-04-07 12-12-43
                  \SC-4-IE-98-2-DAD-1ML-10MIN-2UL.M (Sequence Method)
Last changed   : 4/7/2021 5:15:55 PM by SYSTEM
                  (modified after loading)
Additional Info : Peak(s) manually integrated
  
```

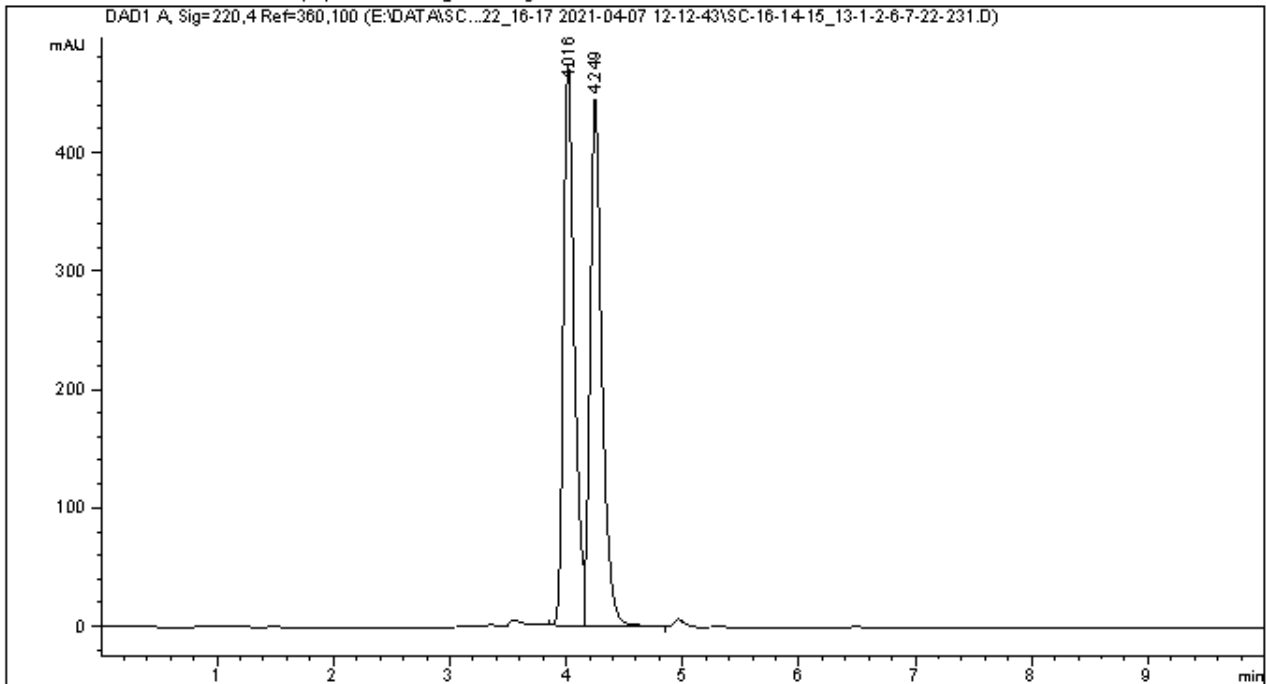

=====  
 Area Percent Report  
 =====

```

Sorted By      :      Signal
Multiplier     :      1.0000
Dilution       :      1.0000
Do not use Multiplier & Dilution Factor with ISTDs
  
```

Signal 1: DAD1 A, Sig=220,4 Ref=360,100

| Peak # | RetTime [min] | Type | Width [min] | Area [mAU*s] | Height [mAU] | Area %  |
|--------|---------------|------|-------------|--------------|--------------|---------|
| 1      | 4.016         | BV   | 0.0998      | 3114.95044   | 473.30215    | 49.7345 |
| 2      | 4.249         | VB   | 0.1057      | 3148.20605   | 443.89285    | 50.2655 |

Totals :                    6263.15649   917.19501

```

=====
Acq. Operator   : SYSTEM                      Seq. Line :   13
Acq. Instrument : 1260                      Location  :    62
Injection Date  : 4/6/2021 9:08:31 PM       Inj       :    1
                                           Inj Volume: 2.000 µl
Acq. Method     : E:\DATA\SC\SC-16-14-15_13-1-2-6-7-22-23 2021-04-06 18-00-44\SC-4-IE-98-2-
                  DAD-1ML-20MIN-2UL.M
Last changed    : 4/6/2021 8:40:39 PM by SYSTEM
Analysis Method : E:\DATA\SC\SC-16-14-15_13-1-2-6-7-22-23 2021-04-06 18-00-44\SC-4-IE-98-2-
                  DAD-1ML-20MIN-2UL.M (Sequence Method)
Last changed    : 4/7/2021 5:18:50 PM by SYSTEM
                  (modified after loading)
Additional Info : Peak(s) manually integrated
  
```

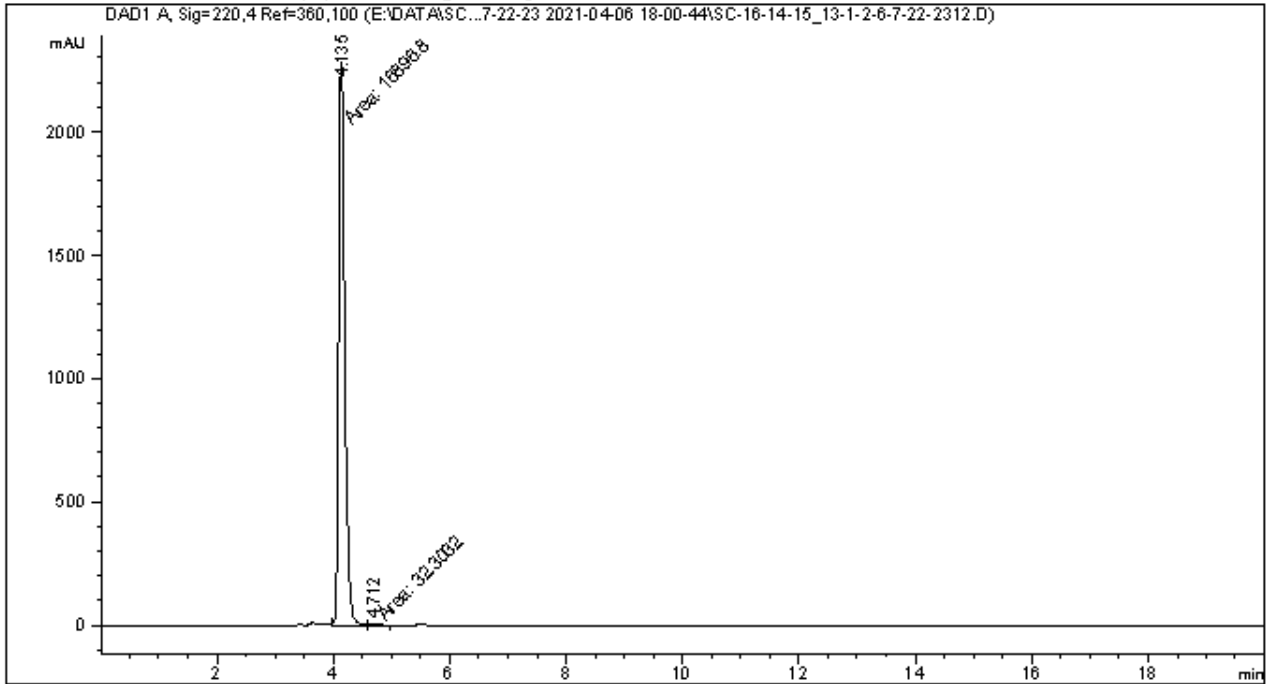

=====  
 Area Percent Report  
 =====

```

Sorted By      :      Signal
Multiplier     :      1.0000
Dilution      :      1.0000
Do not use Multiplier & Dilution Factor with ISTDs
  
```

Signal 1: DAD1 A, Sig=220,4 Ref=360,100

| Peak # | RetTime [min] | Type | Width [min] | Area [mAU*s] | Height [mAU] | Area %  |
|--------|---------------|------|-------------|--------------|--------------|---------|
| 1      | 4.135         | MF   | 0.1235      | 1.68968e4    | 2281.11060   | 99.8092 |
| 2      | 4.712         | FM   | 0.1640      | 32.30324     | 3.28293      | 0.1908  |

Totals :                    1.69291e4  2284.39353

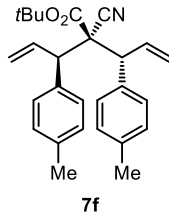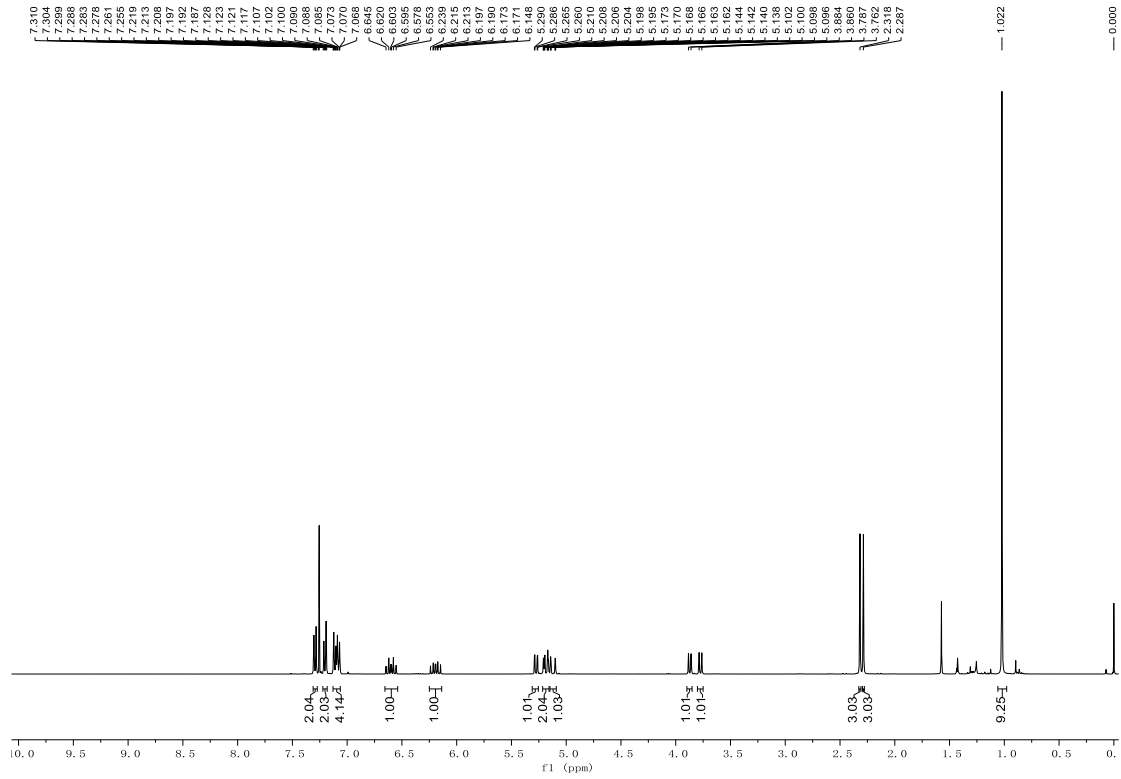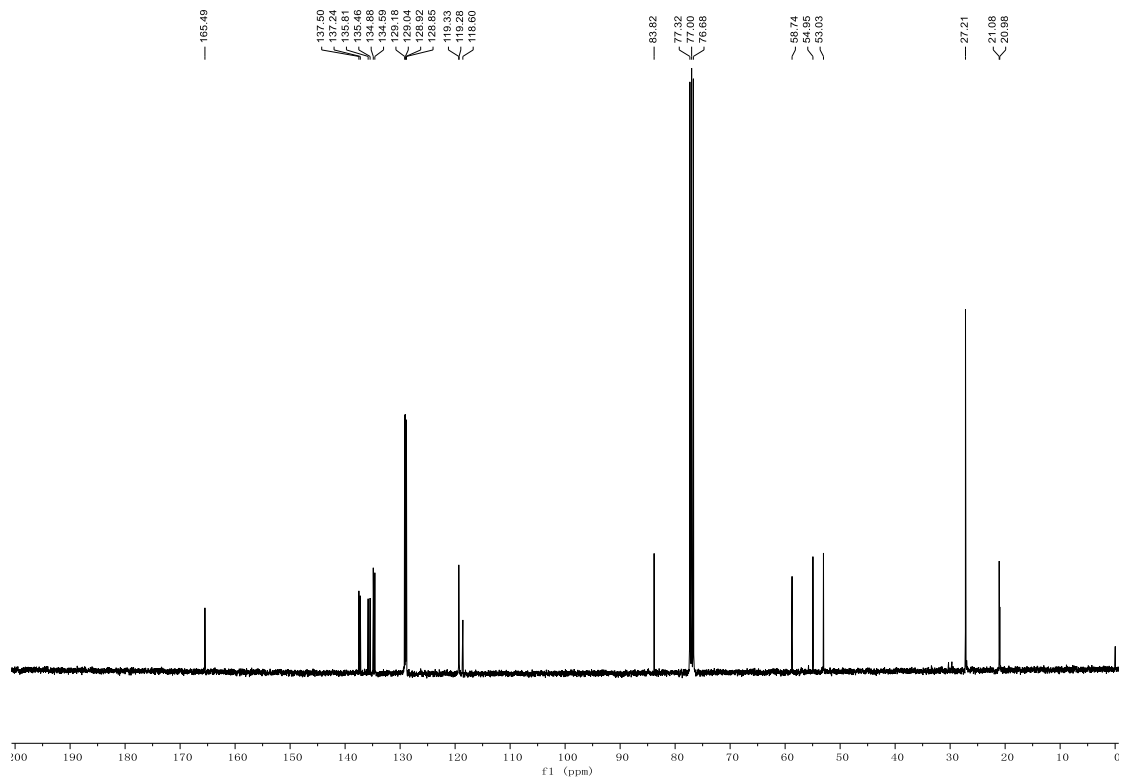

Data File E:\DATA\SC...-1-2-6-7-22-23 2021-04-06 18-00-44\SC-16-14-15\_13-1-2-6-7-22-2321.D  
 Sample Name: SC-13-23-RAC

```

=====
Acq. Operator   : SYSTEM                      Seq. Line :   22
Acq. Instrument : 1260                      Location  :   62
Injection Date  : 4/7/2021 12:11:00 AM      Inj       :    1
                                           Inj Volume: 2.000 µl
Acq. Method     : E:\DATA\SC\SC-16-14-15_13-1-2-6-7-22-23 2021-04-06 18-00-44\SC-4-IE-98-2-
                  DAD-1ML-20MIN-2UL.M
Last changed    : 4/6/2021 8:40:39 PM by SYSTEM
Analysis Method : E:\DATA\SC\SC-16-14-15_13-1-2-6-7-22-23 2021-04-06 18-00-44\SC-4-IE-98-2-
                  DAD-1ML-20MIN-2UL.M (Sequence Method)
Last changed    : 4/7/2021 5:02:56 PM by SYSTEM
                  (modified after loading)
Additional Info : Peak(s) manually integrated
  
```

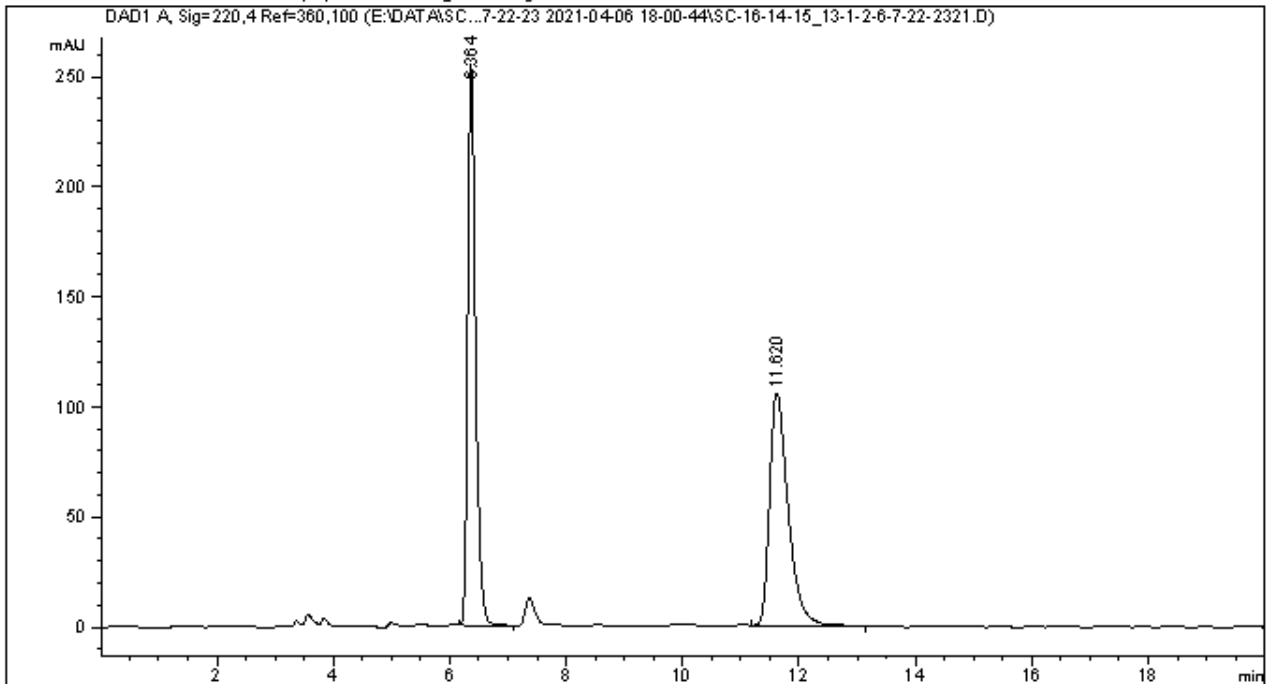

=====  
 Area Percent Report  
 =====

```

Sorted By      :      Signal
Multiplier     :      1.0000
Dilution       :      1.0000
Do not use Multiplier & Dilution Factor with ISTDs
  
```

Signal 1: DAD1 A, Sig=220,4 Ref=360,100

| Peak # | RetTime [min] | Type | Width [min] | Area [mAU*s] | Height [mAU] | Area %  |
|--------|---------------|------|-------------|--------------|--------------|---------|
| 1      | 6.364         | BB   | 0.1414      | 2389.66943   | 254.73019    | 50.4425 |
| 2      | 11.620        | BB   | 0.3365      | 2347.74023   | 105.97092    | 49.5575 |

Totals :                    4737.40967   360.70111

```

=====
Acq. Operator   : SYSTEM                      Seq. Line :   15
Acq. Instrument : 1260                      Location  :    64
Injection Date  : 4/6/2021 9:51:23 PM      Inj       :    1
                                           Inj Volume: 2.000 µl
Acq. Method    : E:\DATA\SC\SC-16-14-15_13-1-2-6-7-22-23 2021-04-06 18-00-44\SC-4-IE-98-2-
                DAD-1ML-20MIN-2UL.M
Last changed   : 4/6/2021 8:40:39 PM by SYSTEM
Analysis Method : E:\DATA\SC\SC-16-14-15_13-1-2-6-7-22-23 2021-04-06 18-00-44\SC-4-IE-98-2-
                DAD-1ML-20MIN-2UL.M (Sequence Method)
Last changed   : 4/7/2021 5:02:56 PM by SYSTEM
                (modified after loading)
Additional Info : Peak(s) manually integrated
  
```

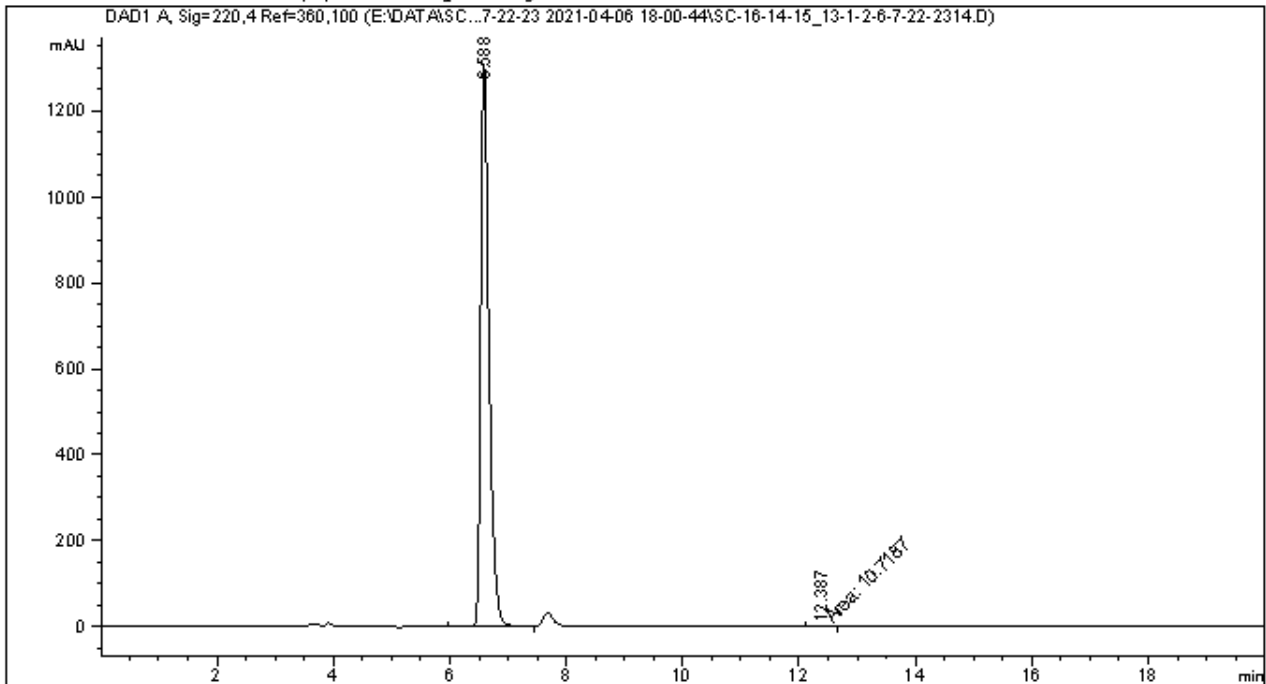

=====  
 Area Percent Report  
 =====

```

Sorted By      :      Signal
Multiplier     :      1.0000
Dilution       :      1.0000
Do not use Multiplier & Dilution Factor with ISTDs
  
```

Signal 1: DAD1 A, Sig=220,4 Ref=360,100

| Peak # | RetTime [min] | Type | Width [min] | Area [mAU*s] | Height [mAU] | Area %  |
|--------|---------------|------|-------------|--------------|--------------|---------|
| 1      | 6.588         | VB R | 0.1497      | 1.29850e4    | 1308.11499   | 99.9175 |
| 2      | 12.387        | MM   | 0.3569      | 10.71871     | 5.00560e-1   | 0.0825  |

Totals :                    1.29957e4  1308.61555

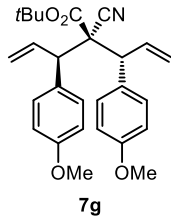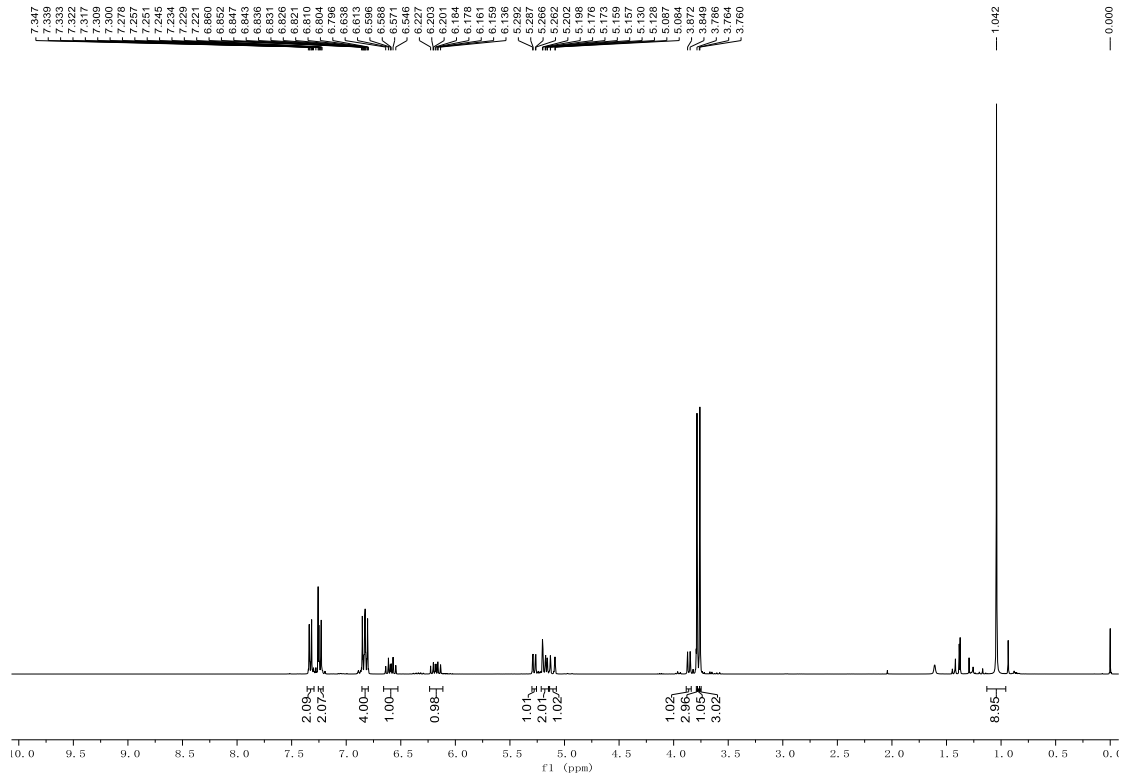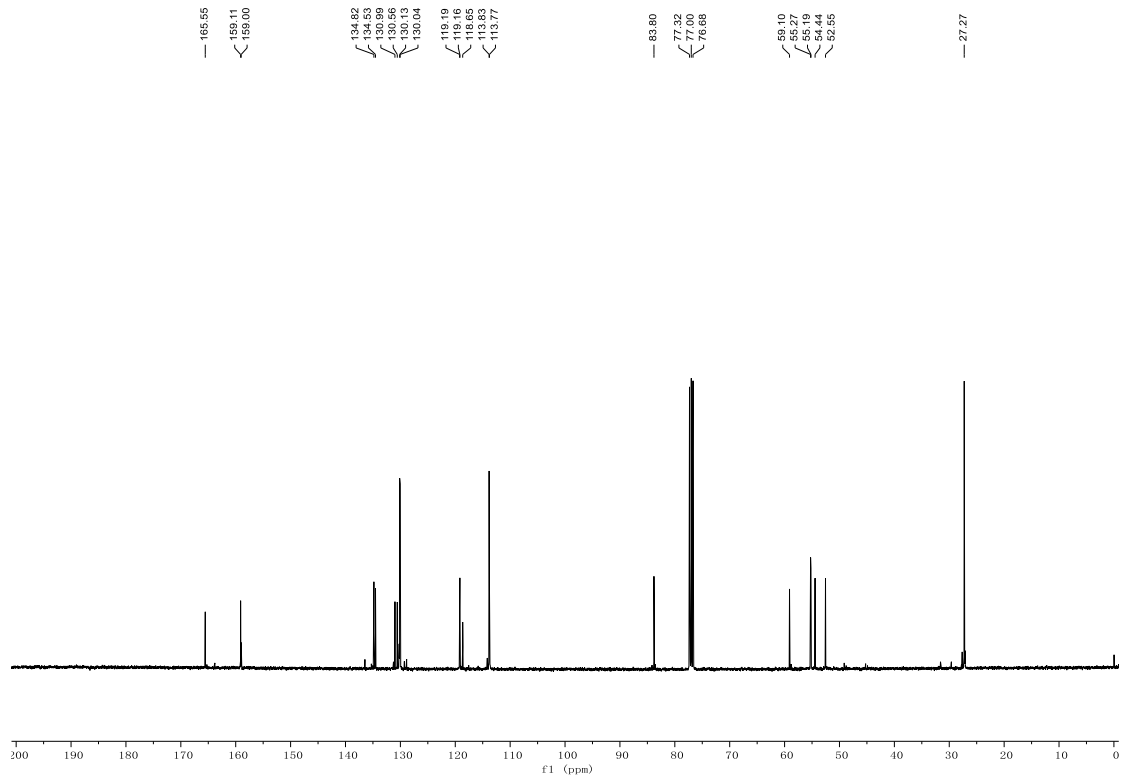



```

=====
Acq. Operator   : SYSTEM                      Seq. Line :   11
Acq. Instrument : 1260                       Location  :   87
Injection Date  : 10/21/2020 1:21:35 PM      Inj       :    1
                                           Inj Volume: 5.000 µl
Acq. Method     : E:\DATA\SC\SC-13-54-55-56-60-61-70-88-89\SC-13-54-55-56-60-61-70-88-89--14-68RAC 2020-10-21 09-37-14\SC-4-IE-90-10-DAD-1ML-15MIN.M
Last changed    : 10/21/2020 9:37:15 AM by SYSTEM
Analysis Method : E:\DATA\SC\SC-13-54-55-56-60-61-70-88-89\SC-13-54-55-56-60-61-70-88-89--14-68RAC 2020-10-21 09-37-14\SC-4-IE-90-10-DAD-1ML-15MIN.M (Sequence Method)
Last changed    : 4/5/2021 10:06:57 PM by SYSTEM
                 (modified after loading)
Additional Info : Peak(s) manually integrated
  
```

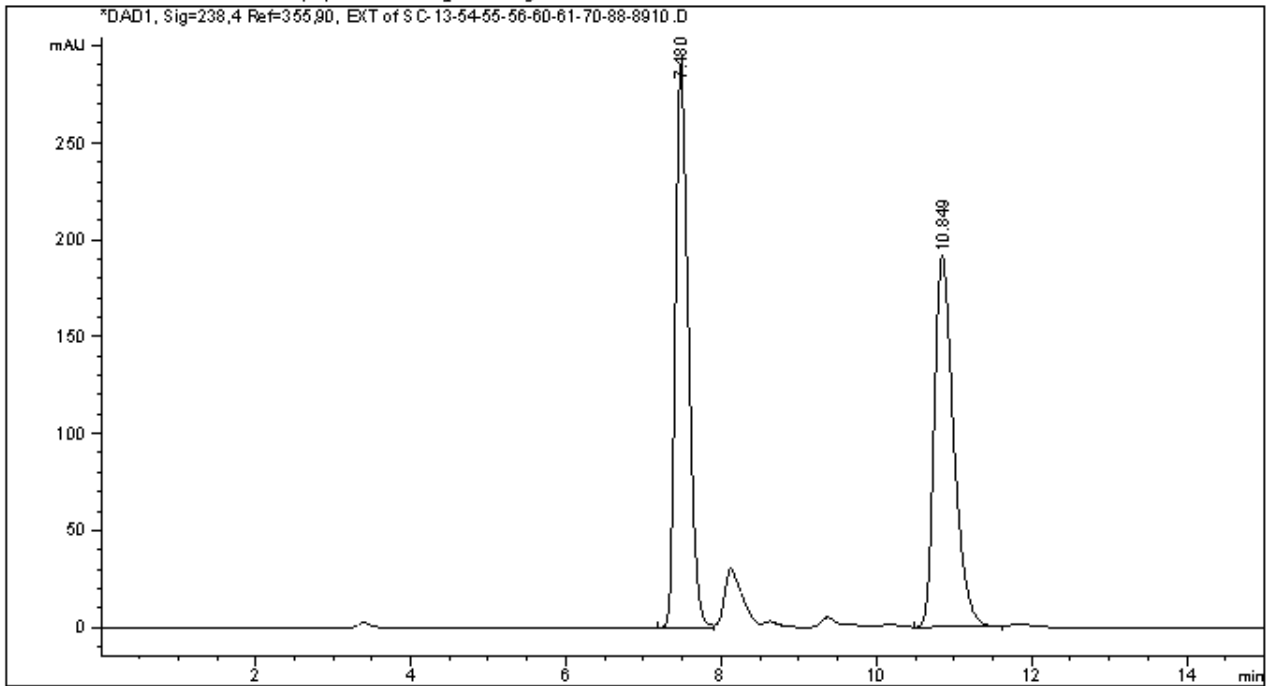

=====  
 Area Percent Report  
 =====

```

Sorted By      :      Signal
Multiplier     :      1.0000
Dilution      :      1.0000
Do not use Multiplier & Dilution Factor with ISTDs
  
```

Signal 1: DAD1, Sig=238,4 Ref=355,90, EXT  
 Signal has been modified after loading from rawdata file!

| Peak # | RetTime [min] | Type | Width [min] | Area [mAU*s] | Height [mAU] | Area %  |
|--------|---------------|------|-------------|--------------|--------------|---------|
| 1      | 7.480         | BV   | 0.1759      | 3355.95093   | 290.27252    | 50.3326 |
| 2      | 10.849        | BB   | 0.2631      | 3311.59668   | 191.19852    | 49.6674 |

Totals :                      6667.54761    481.47104

```

=====
Acq. Operator   : SYSTEM                      Seq. Line :   21
Acq. Instrument : 1260                       Location  :   94
Injection Date  : 10/20/2020 7:53:11 AM      Inj       :    1
                                           Inj Volume: 5.000 µl
Acq. Method     : E:\DATA\SC\SC-13-54-55-56-60-61-70-88-89\SC-13-54-55-56-60-61-70-88-89 2020
                  -10-19 23-54-09\SC-4-IE-90-10-DAD-1ML-15MIN.M
Last changed    : 10/19/2020 11:54:09 PM by SYSTEM
Analysis Method : E:\DATA\SC\SC-13-54-55-56-60-61-70-88-89\SC-13-54-55-56-60-61-70-88-89 2020
                  -10-19 23-54-09\SC-4-IE-90-10-DAD-1ML-15MIN.M (Sequence Method)
Last changed    : 4/7/2021 5:46:07 PM by SYSTEM
                  (modified after loading)
Additional Info : Peak(s) manually integrated
  
```

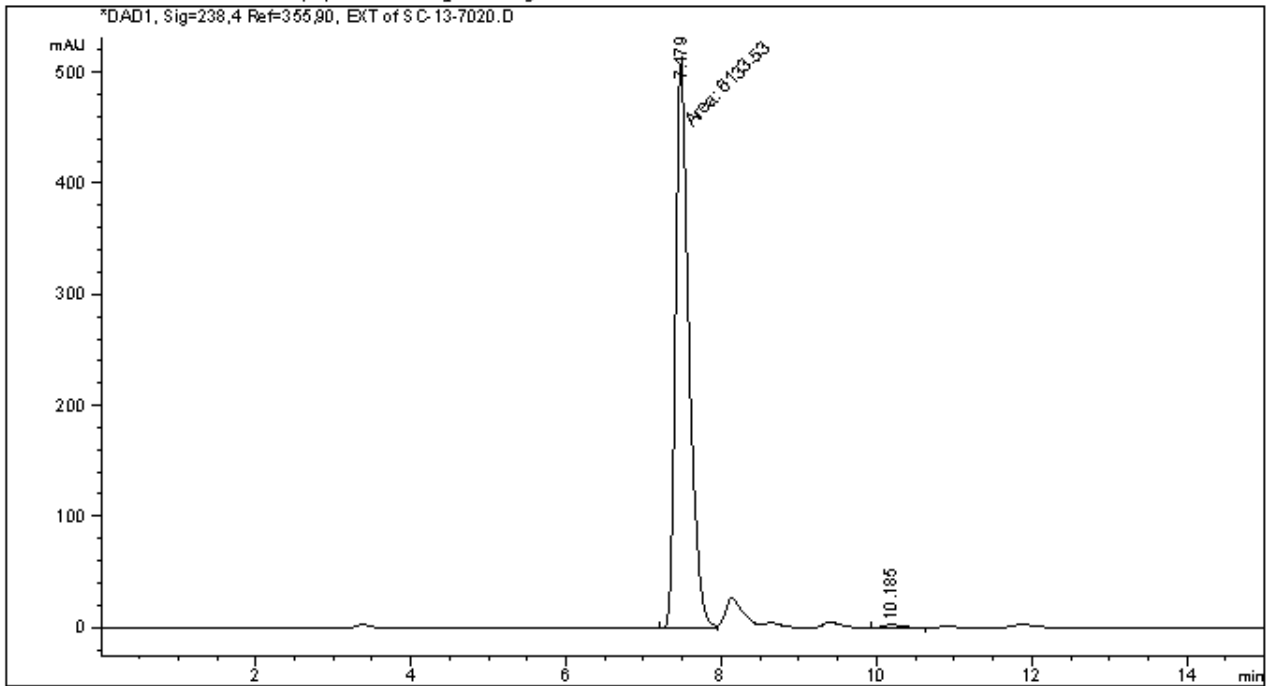

=====  
 Area Percent Report  
 =====

```

Sorted By      :      Signal
Multiplier     :      1.0000
Dilution      :      1.0000
Do not use Multiplier & Dilution Factor with ISTDs
  
```

```

Signal 1: DAD1, Sig=238,4 Ref=355,90, EXT
Signal has been modified after loading from rawdata file!
  
```

| Peak # | RetTime [min] | Type | Width [min] | Area [mAU*s] | Height [mAU] | Area %  |
|--------|---------------|------|-------------|--------------|--------------|---------|
| 1      | 7.479         | MF   | 0.2016      | 6133.53320   | 507.03662    | 99.4223 |
| 2      | 10.185        | BB   | 0.2142      | 35.63805     | 2.36017      | 0.5777  |

```
Totals :                6169.17125  509.39679
```

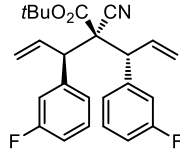

7h

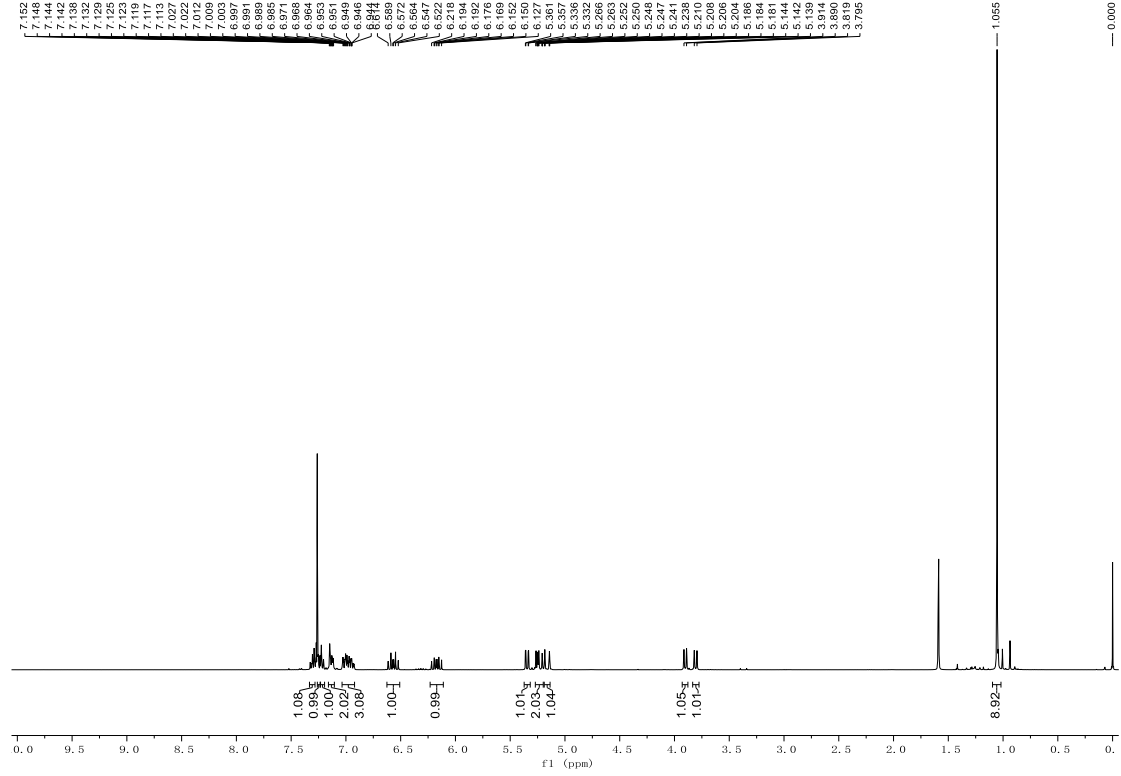

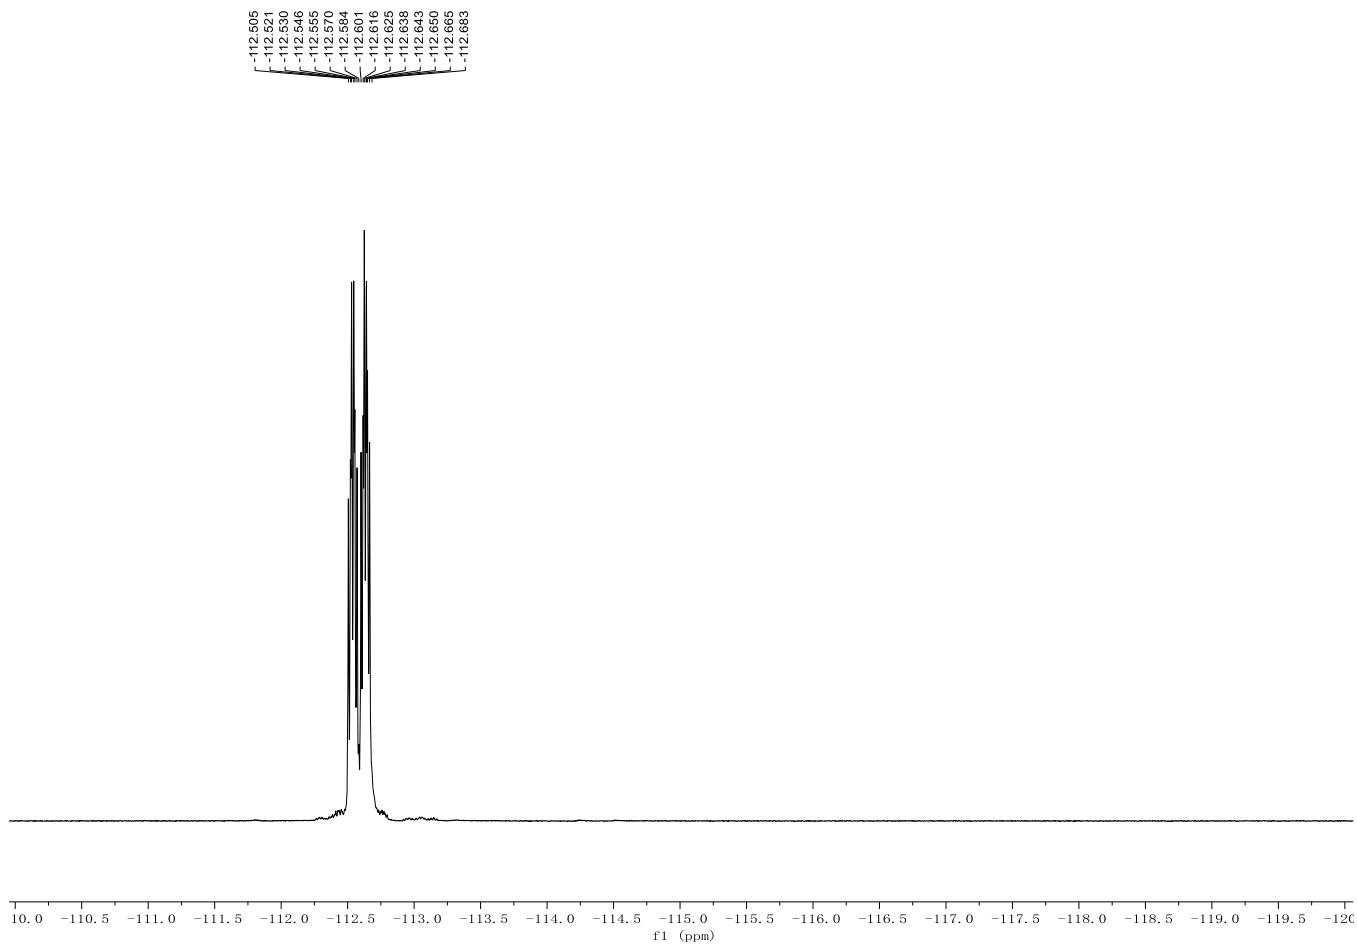

```

=====
Acq. Operator   : SYSTEM                      Seq. Line :    1
Acq. Instrument : 1260                        Location  :   81
Injection Date  : 10/21/2020 9:38:38 AM      Inj       :    1
                                           Inj Volume: 2.000 µl
Acq. Method     : E:\DATA\SC\SC-13-54-55-56-60-61-70-88-89\SC-13-54-55-56-60-61-70-88-89--14-
68RAC 2020-10-21 09-37-14\SC-4-IE-99-1-DAD-1ML-20MIN-2UL.M
Last changed    : 10/21/2020 9:37:14 AM by SYSTEM
Analysis Method : E:\DATA\SC\SC-13-54-55-56-60-61-70-88-89\SC-13-54-55-56-60-61-70-88-89--14-
68RAC 2020-10-21 09-37-14\SC-4-IE-99-1-DAD-1ML-20MIN-2UL.M (Sequence Method
)
Last changed    : 4/5/2021 9:43:40 PM by SYSTEM
                 (modified after loading)
Additional Info  : Peak(s) manually integrated
  
```

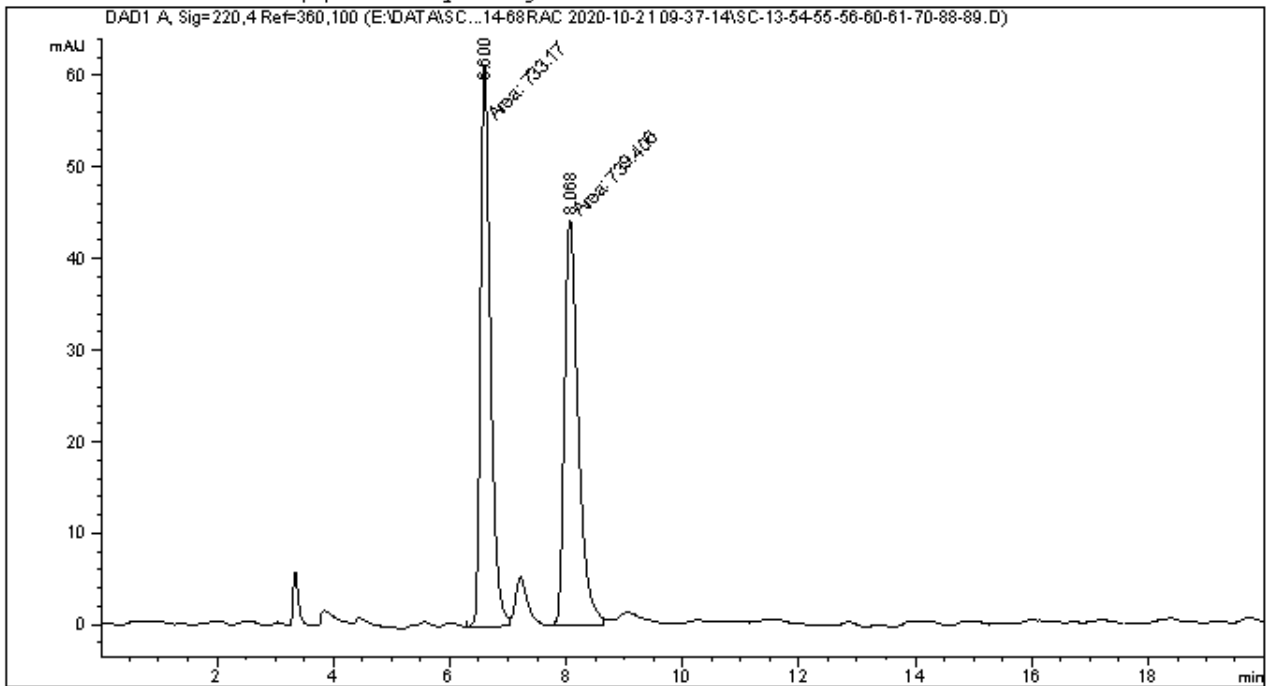

=====  
 Area Percent Report  
 =====

```

Sorted By      :      Signal
Multiplier     :      1.0000
Dilution       :      1.0000
Do not use Multiplier & Dilution Factor with ISTDs
  
```

Signal 1: DAD1 A, Sig=220,4 Ref=360,100

| Peak # | RetTime [min] | Type | Width [min] | Area [mAU*s] | Height [mAU] | Area %  |
|--------|---------------|------|-------------|--------------|--------------|---------|
| 1      | 6.600         | MF   | 0.1992      | 733.17047    | 61.33347     | 49.7883 |
| 2      | 8.068         | MM   | 0.2778      | 739.40637    | 44.36321     | 50.2117 |

Totals :                    1472.57684   105.69667

```

=====
Acq. Operator   : SYSTEM                      Seq. Line :    6
Acq. Instrument : 1260                        Location  :   73
Injection Date  : 10/20/2020 2:42:13 AM      Inj       :    1
                                           Inj Volume: 2.000 µl
Acq. Method    : E:\DATA\SC\SC-13-54-55-56-60-61-70-88-89\SC-13-54-55-56-60-61-70-88-89 2020
                -10-19 23-54-09\SC-4-IE-99-1-DAD-1ML-20MIN-2UL.M
Last changed   : 10/19/2020 11:54:09 PM by SYSTEM
Analysis Method : E:\DATA\SC\SC-13-54-55-56-60-61-70-88-89\SC-13-54-55-56-60-61-70-88-89 2020
                -10-19 23-54-09\SC-4-IE-99-1-DAD-1ML-20MIN-2UL.M (Sequence Method)
Last changed   : 4/7/2021 5:25:37 PM by SYSTEM
                (modified after loading)
Additional Info : Peak(s) manually integrated
  
```

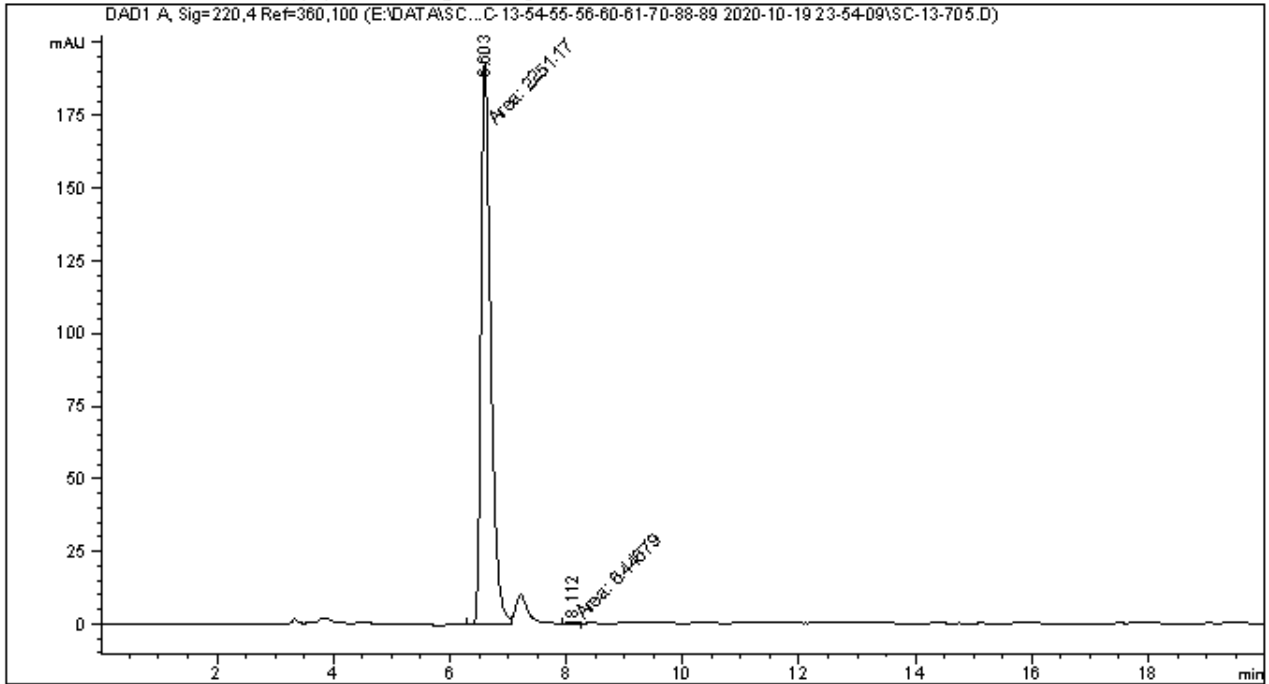

=====  
 Area Percent Report  
 =====

```

Sorted By      :      Signal
Multiplier     :      1.0000
Dilution       :      1.0000
Do not use Multiplier & Dilution Factor with ISTDs
  
```

Signal 1: DAD1 A, Sig=220,4 Ref=360,100

| Peak # | RetTime [min] | Type | Width [min] | Area [mAU*s] | Height [mAU] | Area %  |
|--------|---------------|------|-------------|--------------|--------------|---------|
| 1      | 6.603         | MF   | 0.1940      | 2251.17212   | 193.36316    | 99.7144 |
| 2      | 8.112         | MM   | 0.2504      | 6.44679      | 4.29162e-1   | 0.2856  |

Totals :                    2257.61891   193.79232

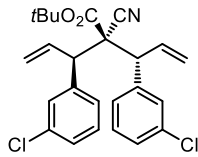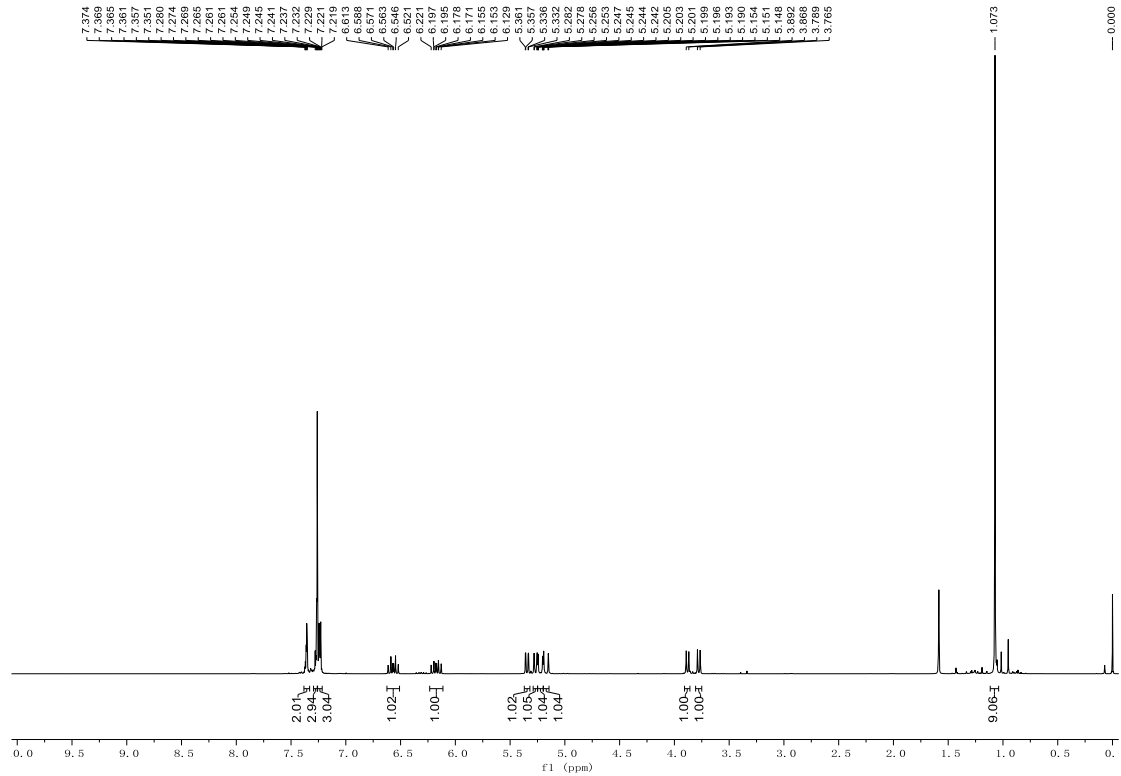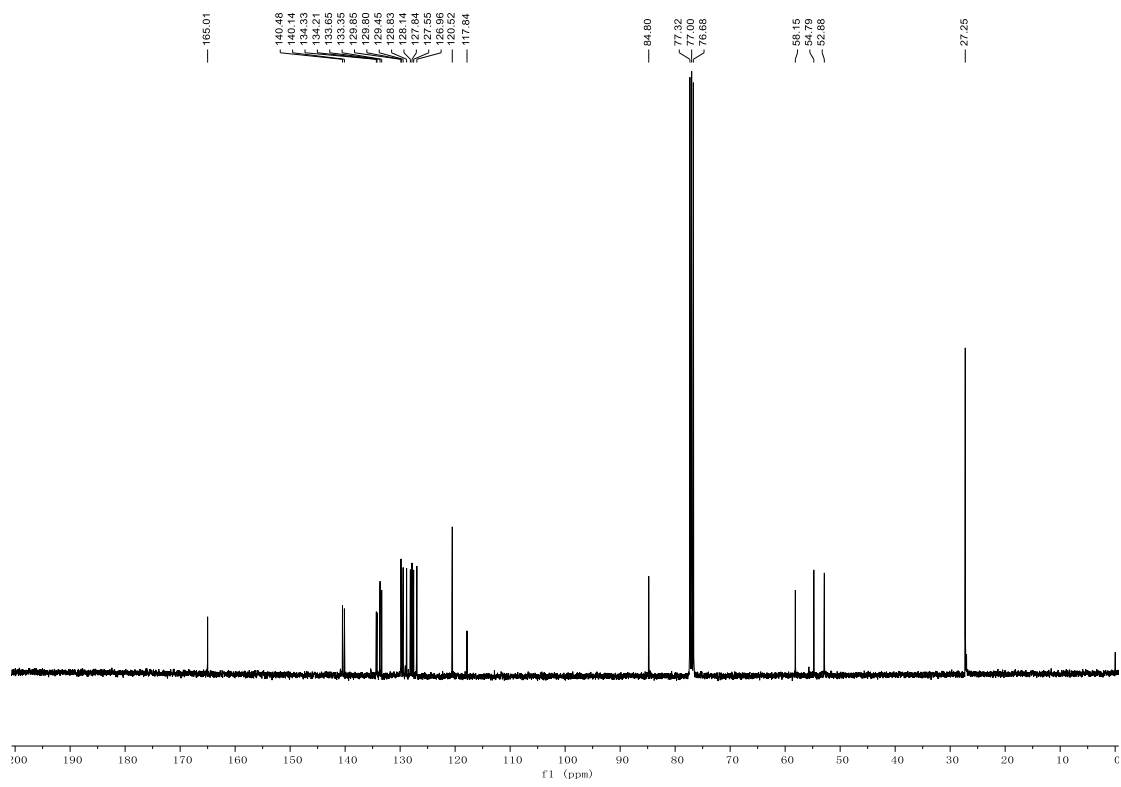

Data File E:\DATA\SC...8-89--14-68RAC 2020-10-21 09-37-14\SC-13-54-55-56-60-61-70-88-891.D  
 Sample Name: SC-13-55-RAC

```

=====
Acq. Operator   : SYSTEM                      Seq. Line :    2
Acq. Instrument : 1260                        Location  :   82
Injection Date  : 10/21/2020 9:59:58 AM      Inj       :    1
                                           Inj Volume: 2.000 µl
Acq. Method    : E:\DATA\SC\SC-13-54-55-56-60-61-70-88-89\SC-13-54-55-56-60-61-70-88-89--14-68RAC 2020-10-21 09-37-14\SC-4-IE-99-1-DAD-1ML-20MIN-2UL.M
Last changed   : 10/21/2020 9:37:14 AM by SYSTEM
Analysis Method : E:\DATA\SC\SC-13-54-55-56-60-61-70-88-89\SC-13-54-55-56-60-61-70-88-89--14-68RAC 2020-10-21 09-37-14\SC-4-IE-99-1-DAD-1ML-20MIN-2UL.M (Sequence Method)
Last changed   : 4/5/2021 9:47:07 PM by SYSTEM
                (modified after loading)
Additional Info : Peak(s) manually integrated
  
```

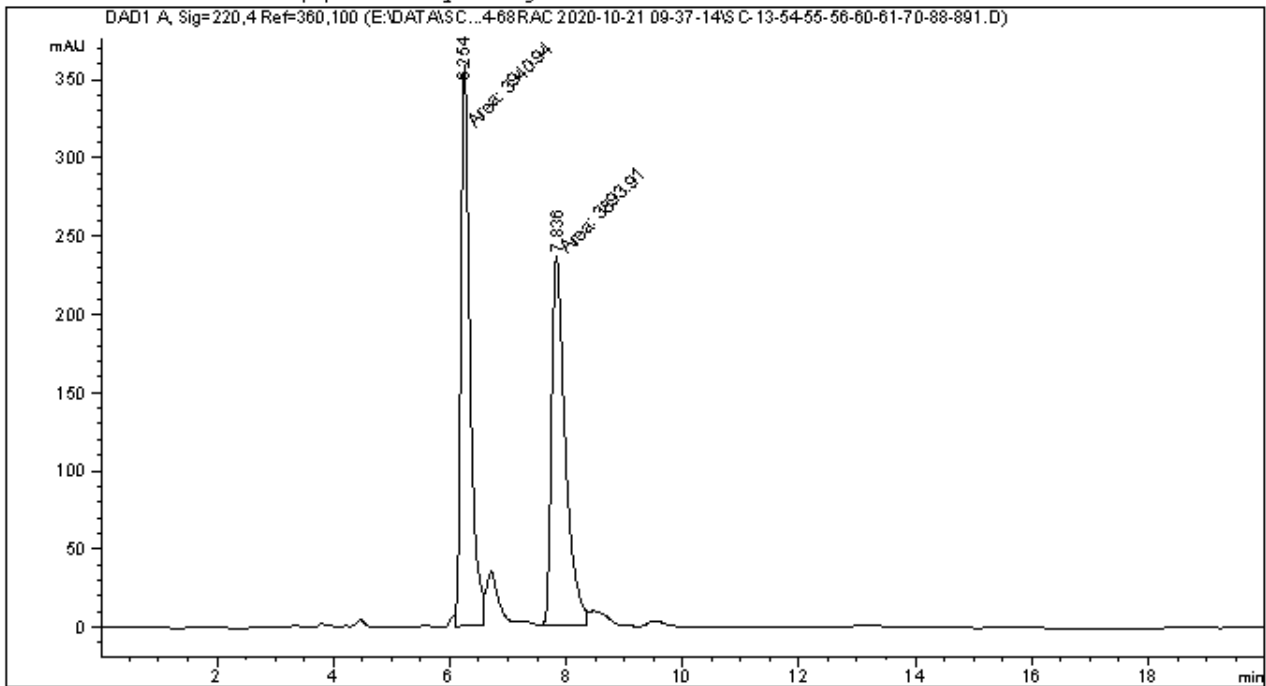

Area Percent Report

```

Sorted By      : Signal
Multiplier     : 1.0000
Dilution       : 1.0000
Do not use Multiplier & Dilution Factor with ISTDs
  
```

Signal 1: DAD1 A, Sig=220,4 Ref=360,100

| Peak # | RetTime [min] | Type | Width [min] | Area [mAU*s] | Height [mAU] | Area %  |
|--------|---------------|------|-------------|--------------|--------------|---------|
| 1      | 6.254         | FM   | 0.1835      | 3940.93604   | 357.94888    | 50.3001 |
| 2      | 7.836         | MM   | 0.2757      | 3893.90527   | 235.40367    | 49.6999 |

Totals : 7834.84131 593.35255



```

=====
Acq. Operator   : SYSTEM                      Seq. Line :    9
Acq. Instrument : 1260                        Location  :   76
Injection Date  : 10/20/2020 3:46:40 AM      Inj       :    1
                                           Inj Volume: 2.000 µl
Acq. Method     : E:\DATA\SC\SC-13-54-55-56-60-61-70-88-89\SC-13-54-55-56-60-61-70-88-89 2020
                  -10-19 23-54-09\SC-4-IE-99-1-DAD-1ML-20MIN-2UL.M
Last changed    : 10/19/2020 11:54:09 PM by SYSTEM
Analysis Method : E:\DATA\SC\SC-13-54-55-56-60-61-70-88-89\SC-13-54-55-56-60-61-70-88-89 2020
                  -10-19 23-54-09\SC-4-IE-99-1-DAD-1ML-20MIN-2UL.M (Sequence Method)
Last changed    : 4/7/2021 5:27:49 PM by SYSTEM
                  (modified after loading)
Additional Info : Peak(s) manually integrated
  
```

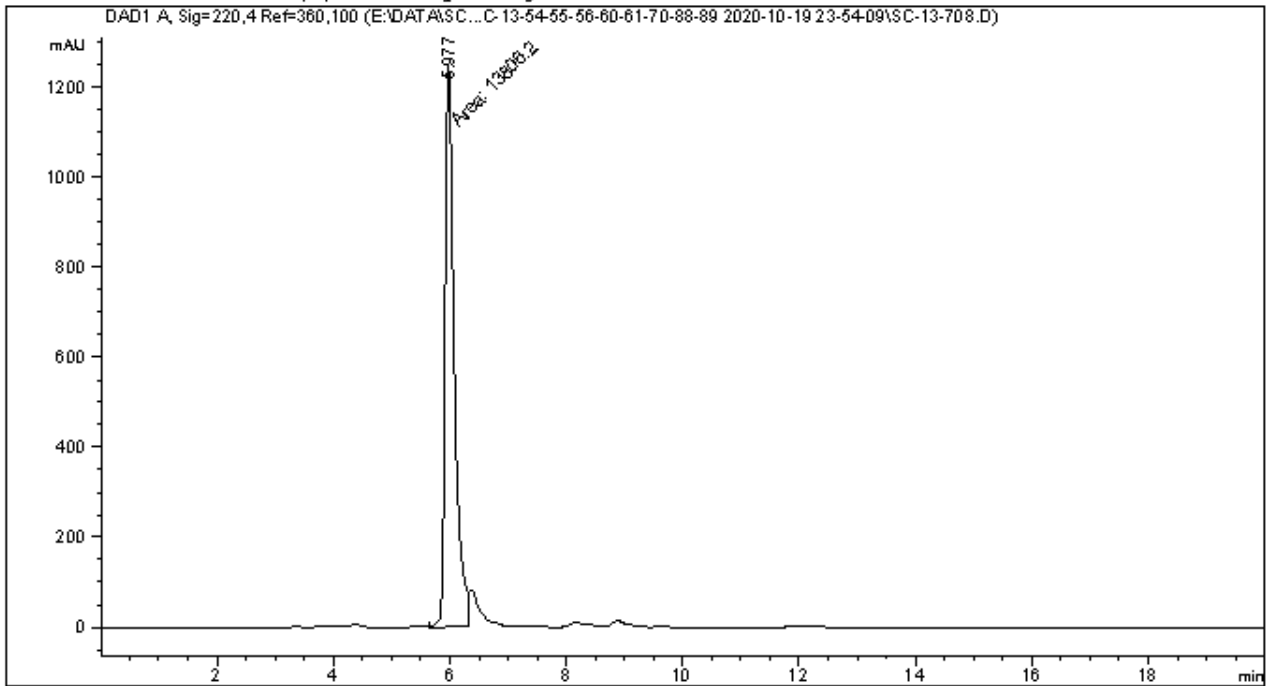

=====  
 Area Percent Report  
 =====

```

Sorted By      :      Signal
Multiplier     :      1.0000
Dilution       :      1.0000
Do not use Multiplier & Dilution Factor with ISTDs
  
```

Signal 1: DAD1 A, Sig=220,4 Ref=360,100

| Peak # | RetTime [min] | Type | Width [min] | Area [mAU*s] | Height [mAU] | Area %   |
|--------|---------------|------|-------------|--------------|--------------|----------|
| 1      | 5.977         | MF   | 0.1841      | 1.38062e4    | 1250.17249   | 100.0000 |

Totals :                    1.38062e4  1250.17249

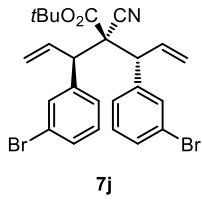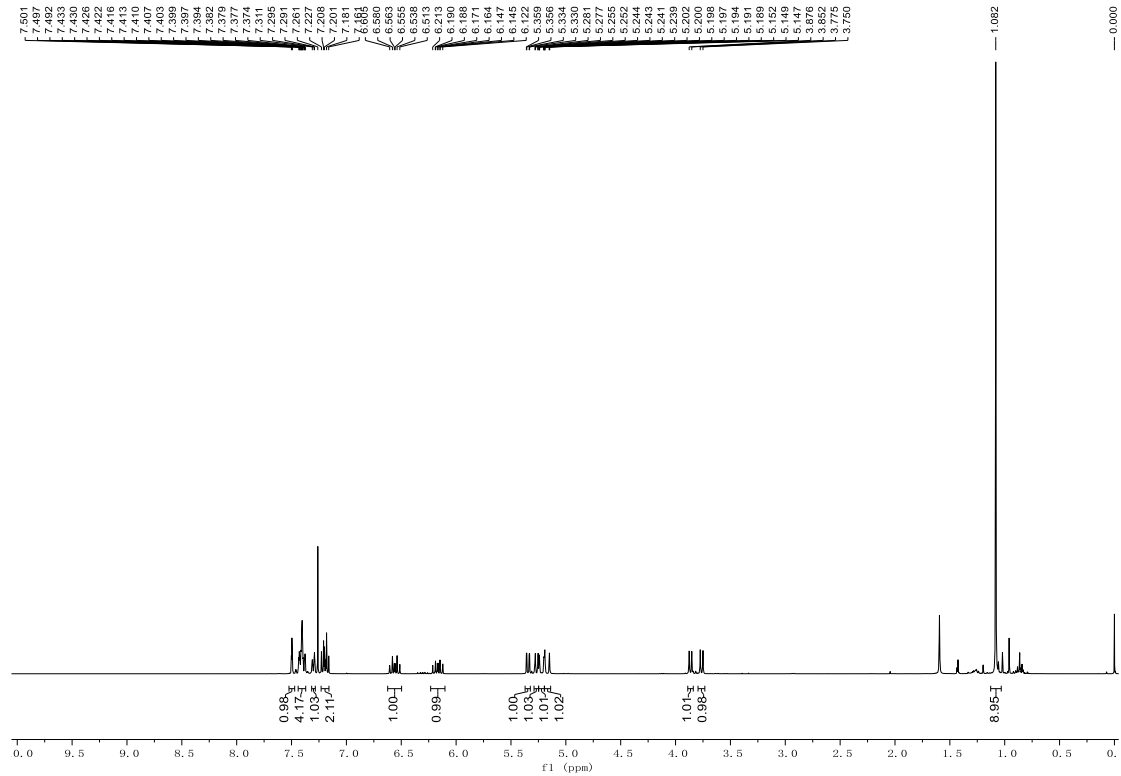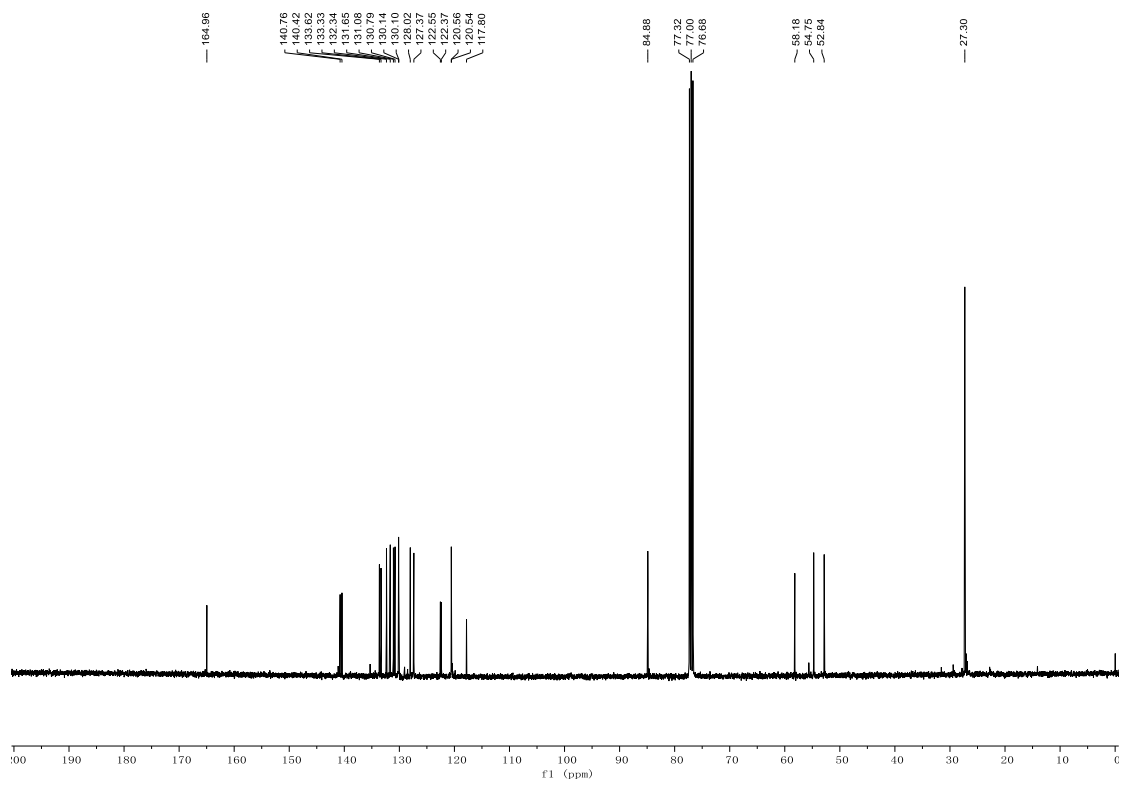

```

=====
Acq. Operator   : SYSTEM                      Seq. Line :    3
Acq. Instrument : 1260                       Location  :   83
Injection Date  : 10/21/2020 10:21:22 AM     Inj       :    1
                                           Inj Volume: 2.000 µl
Acq. Method     : E:\DATA\SC\SC-13-54-55-56-60-61-70-88-89\SC-13-54-55-56-60-61-70-88-89--14-68RAC 2020-10-21 09-37-14\SC-4-IE-99-1-DAD-1ML-20MIN-2UL.M
Last changed    : 10/21/2020 9:37:14 AM by SYSTEM
Analysis Method : E:\DATA\SC\SC-13-54-55-56-60-61-70-88-89\SC-13-54-55-56-60-61-70-88-89--14-68RAC 2020-10-21 09-37-14\SC-4-IE-99-1-DAD-1ML-20MIN-2UL.M (Sequence Method)
Last changed    : 4/5/2021 9:49:19 PM by SYSTEM
                  (modified after loading)
Additional Info  : Peak(s) manually integrated
  
```

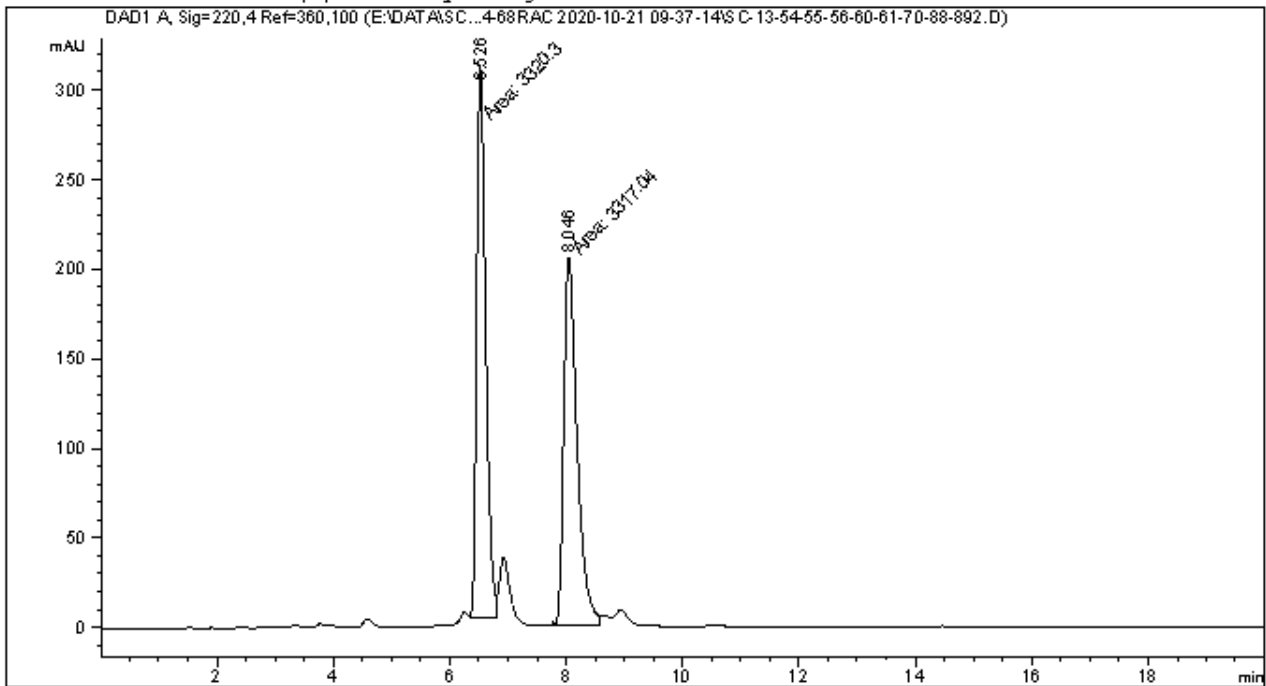

=====  
 Area Percent Report  
 =====

```

Sorted By      : Signal
Multiplier     : 1.0000
Dilution       : 1.0000
Do not use Multiplier & Dilution Factor with ISTDs
  
```

Signal 1: DAD1 A, Sig=220,4 Ref=360,100

| Peak # | RetTime [min] | Type | Width [min] | Area [mAU*s] | Height [mAU] | Area %  |
|--------|---------------|------|-------------|--------------|--------------|---------|
| 1      | 6.526         | MM   | 0.1798      | 3320.29688   | 307.72296    | 50.0245 |
| 2      | 8.046         | MM   | 0.2691      | 3317.03979   | 205.41220    | 49.9755 |

Totals :                                    6637.33667    513.13516

```

=====
Acq. Operator   : SYSTEM                      Seq. Line :   12
Acq. Instrument : 1260                      Location  :    79
Injection Date  : 10/20/2020 4:51:16 AM      Inj       :    1
                                           Inj Volume: 2.000 µl
Acq. Method     : E:\DATA\SC\SC-13-54-55-56-60-61-70-88-89\SC-13-54-55-56-60-61-70-88-89 2020
                  -10-19 23-54-09\SC-4-IE-99-1-DAD-1ML-20MIN-2UL.M
Last changed    : 10/19/2020 11:54:09 PM by SYSTEM
Analysis Method : E:\DATA\SC\SC-13-54-55-56-60-61-70-88-89\SC-13-54-55-56-60-61-70-88-89 2020
                  -10-19 23-54-09\SC-4-IE-99-1-DAD-1ML-20MIN-2UL.M (Sequence Method)
Last changed    : 4/7/2021 5:31:11 PM by SYSTEM
                  (modified after loading)
Additional Info : Peak(s) manually integrated
  
```

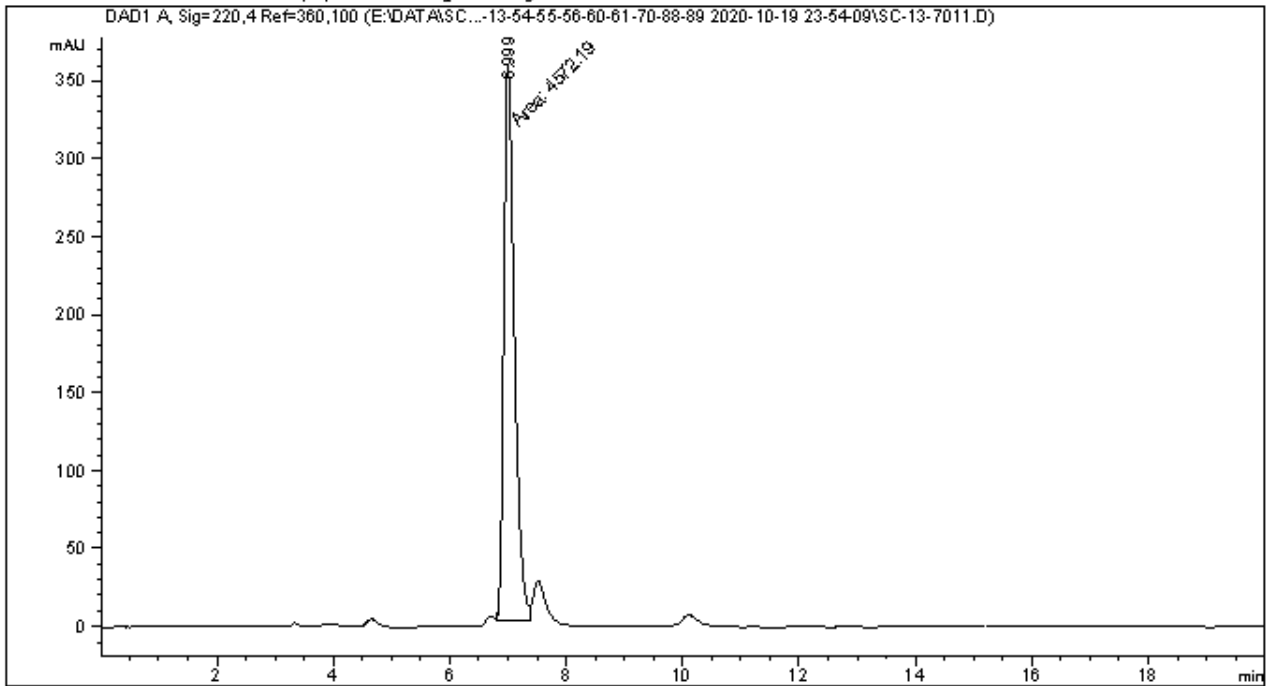

=====  
 Area Percent Report  
 =====

```

Sorted By      :      Signal
Multiplier     :      1.0000
Dilution       :      1.0000
Do not use Multiplier & Dilution Factor with ISTDs
  
```

Signal 1: DAD1 A, Sig=220,4 Ref=360,100

| Peak # | RetTime [min] | Type | Width [min] | Area [mAU*s] | Height [mAU] | Area %   |
|--------|---------------|------|-------------|--------------|--------------|----------|
| 1      | 6.999         | MM   | 0.2134      | 4572.18848   | 357.04721    | 100.0000 |

Totals :                    4572.18848   357.04721

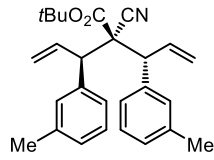

7k

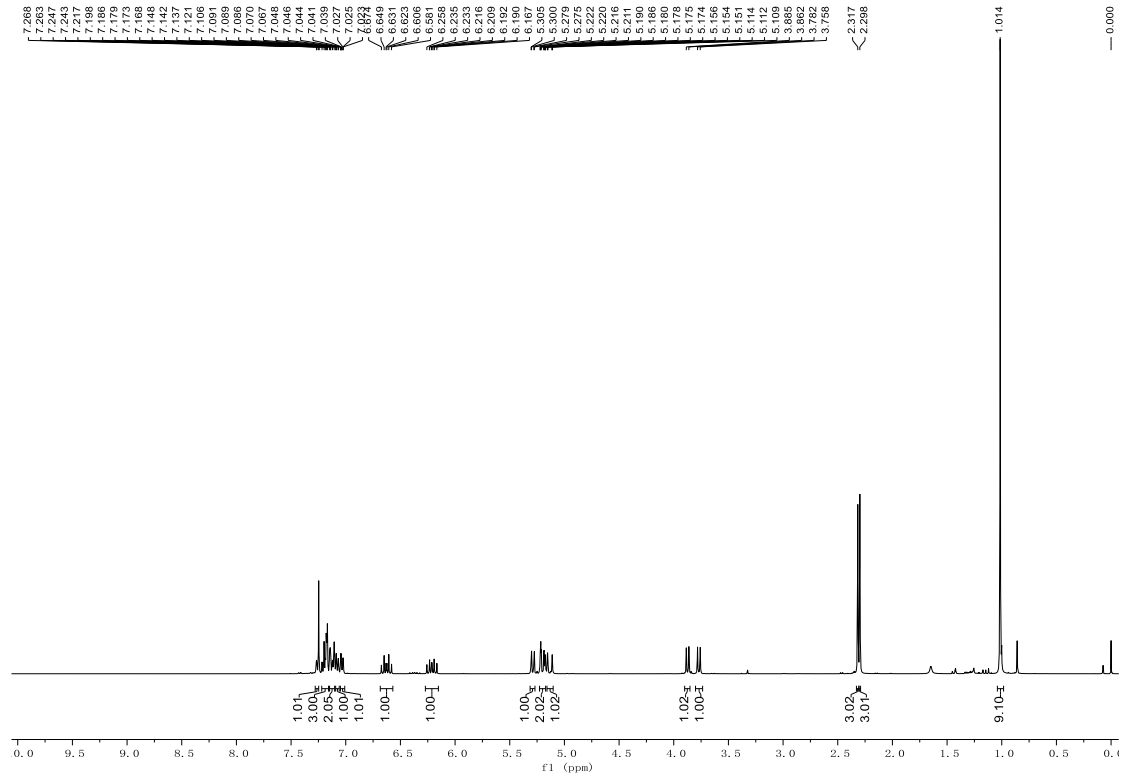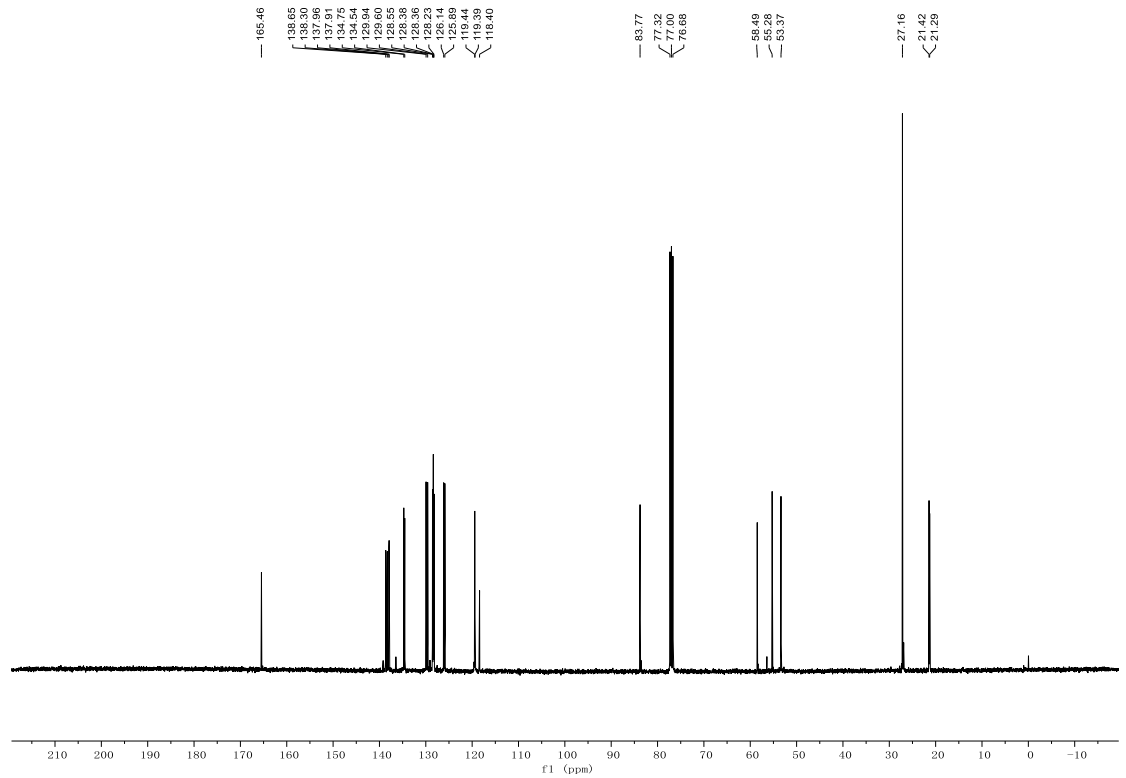

```

=====
Acq. Operator   : SYSTEM                      Seq. Line :    4
Acq. Instrument : 1260                        Location  :   84
Injection Date  : 10/21/2020 10:42:40 AM     Inj       :    1
                                           Inj Volume: 2.000 µl
Acq. Method     : E:\DATA\SC\SC-13-54-55-56-60-61-70-88-89\SC-13-54-55-56-60-61-70-88-89--14-68RAC 2020-10-21 09-37-14\SC-4-IE-99-1-DAD-1ML-20MIN-2UL.M
Last changed    : 10/21/2020 10:56:52 AM by SYSTEM
                  (modified after loading)
Analysis Method : E:\DATA\SC\SC-13-54-55-56-60-61-70-88-89\SC-13-54-55-56-60-61-70-88-89--14-68RAC 2020-10-21 09-37-14\SC-4-IE-99-1-DAD-1ML-20MIN-2UL.M (Sequence Method)
Last changed    : 4/5/2021 9:49:19 PM by SYSTEM
                  (modified after loading)
Additional Info  : Peak(s) manually integrated
  
```

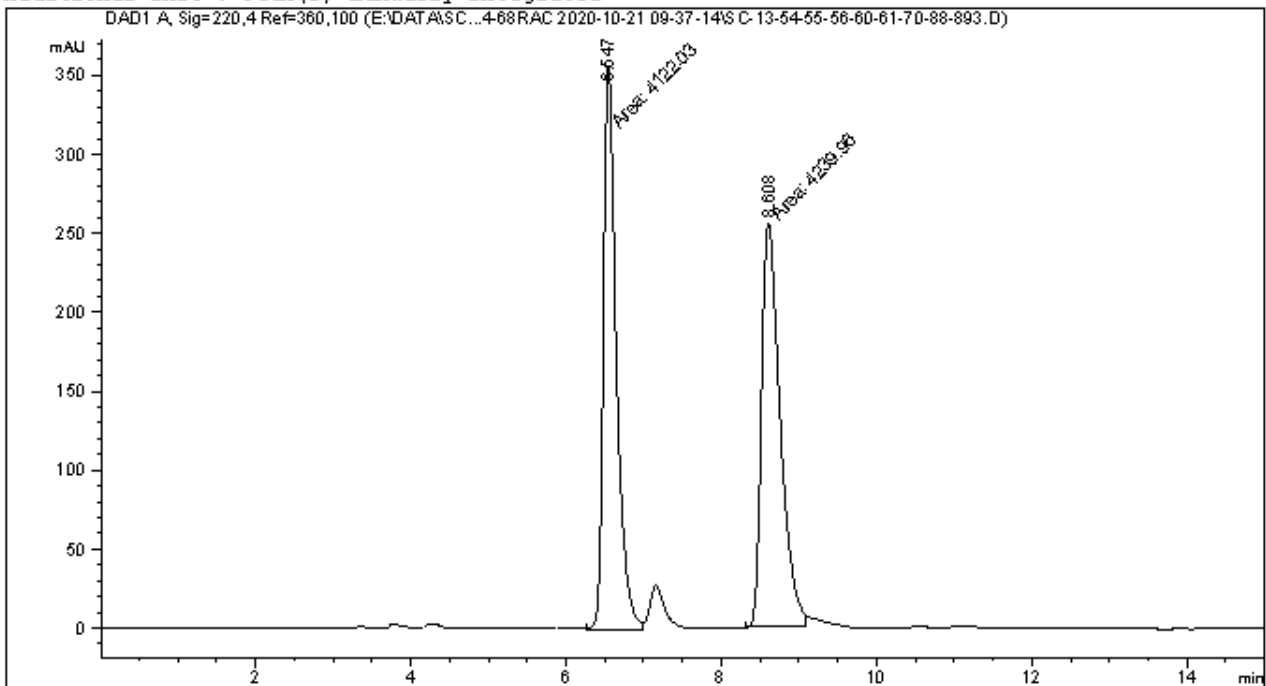

Area Percent Report

```

=====
Sorted By      :      Signal
Multiplier     :      1.0000
Dilution       :      1.0000
Do not use Multiplier & Dilution Factor with ISTDs
  
```

Signal 1: DAD1 A, Sig=220,4 Ref=360,100

| Peak # | RetTime [min] | Type | Width [min] | Area [mAU*s] | Height [mAU] | Area %  |
|--------|---------------|------|-------------|--------------|--------------|---------|
| 1      | 6.547         | MM   | 0.1927      | 4122.02734   | 356.43216    | 49.2948 |
| 2      | 8.608         | MM   | 0.2770      | 4239.95996   | 255.08609    | 50.7052 |

```

=====
Acq. Operator   : SYSTEM                      Seq. Line :   15
Acq. Instrument : 1260                       Location  :    83
Injection Date  : 10/20/2020 5:55:18 AM      Inj       :    1
                                           Inj Volume: 2.000 µl
Acq. Method     : E:\DATA\SC\SC-13-54-55-56-60-61-70-88-89\SC-13-54-55-56-60-61-70-88-89 2020
                  -10-19 23-54-09\SC-4-IE-99-1-DAD-1ML-20MIN-2UL.M
Last changed    : 10/19/2020 11:54:09 PM by SYSTEM
Analysis Method : E:\DATA\SC\SC-13-54-55-56-60-61-70-88-89\SC-13-54-55-56-60-61-70-88-89 2020
                  -10-19 23-54-09\SC-4-IE-99-1-DAD-1ML-20MIN-2UL.M (Sequence Method)
Last changed    : 4/7/2021 5:35:20 PM by SYSTEM
                  (modified after loading)
Additional Info : Peak(s) manually integrated
  
```

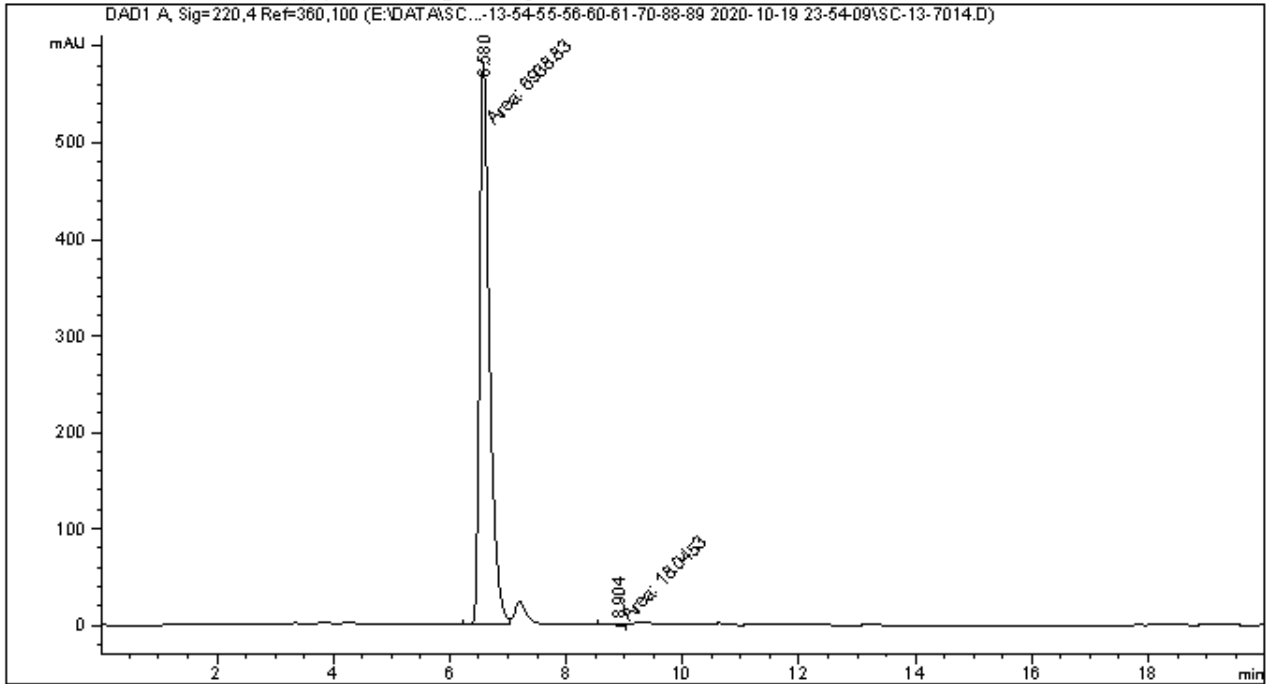

=====  
 Area Percent Report  
 =====

```

Sorted By      :      Signal
Multiplier     :      1.0000
Dilution       :      1.0000
Do not use Multiplier & Dilution Factor with ISTDs
  
```

Signal 1: DAD1 A, Sig=220,4 Ref=360,100

| Peak # | RetTime [min] | Type | Width [min] | Area [mAU*s] | Height [mAU] | Area %  |
|--------|---------------|------|-------------|--------------|--------------|---------|
| 1      | 6.580         | MF   | 0.1986      | 6938.83398   | 582.45392    | 99.7406 |
| 2      | 8.904         | MM   | 0.3685      | 18.04535     | 8.16098e-1   | 0.2594  |

Totals :                    6956.87933   583.27002

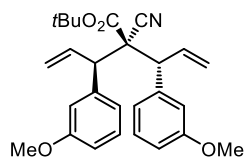

71

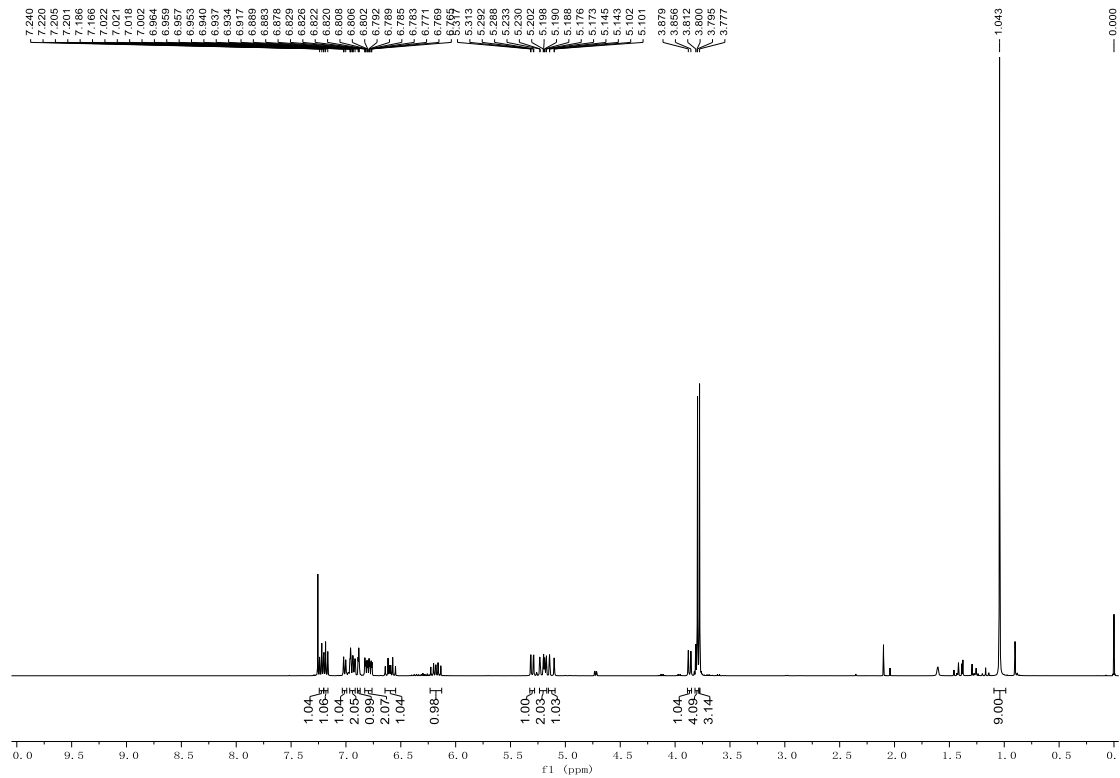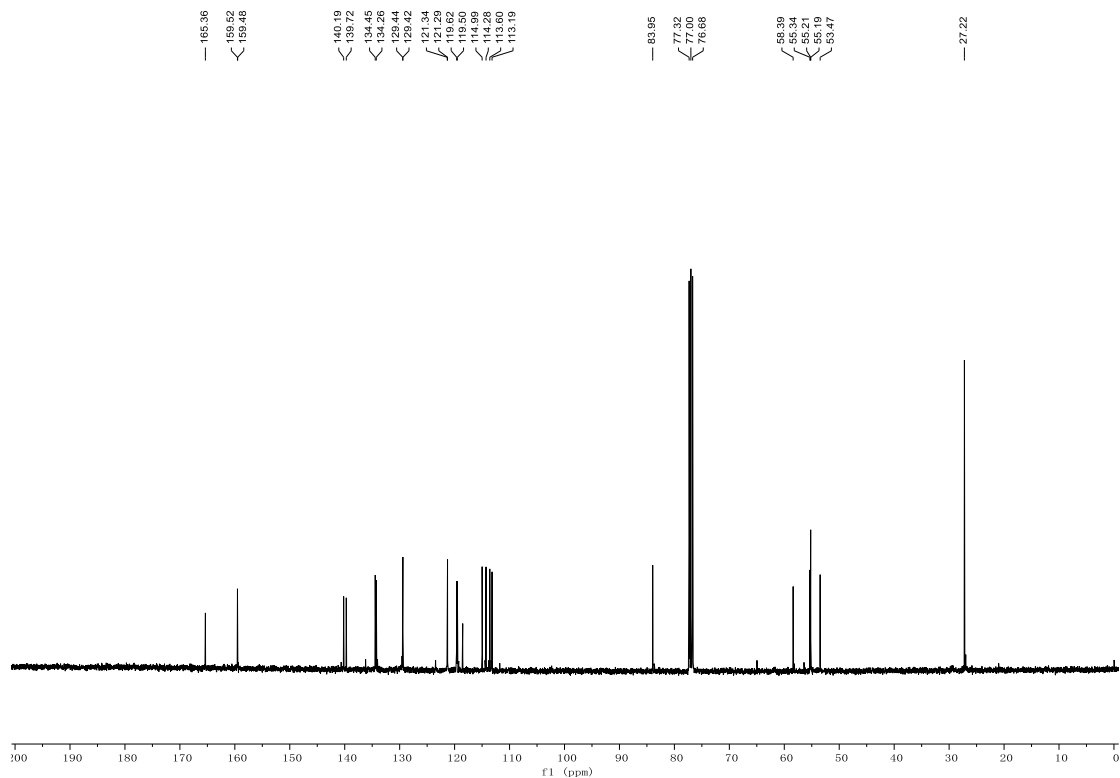



```

=====
Acq. Operator   : SYSTEM                      Seq. Line :   12
Acq. Instrument : 1260                      Location  :    88
Injection Date  : 10/21/2020 1:38:01 PM      Inj       :    1
                                           Inj Volume: 5.000 µl
Acq. Method     : E:\DATA\SC\SC-13-54-55-56-60-61-70-88-89\SC-13-54-55-56-60-61-70-88-89--14-68RAC 2020-10-21 09-37-14\SC-4-IE-90-10-DAD-1ML-15MIN.M
Last changed    : 10/21/2020 9:37:15 AM by SYSTEM
Analysis Method : E:\DATA\SC\SC-13-54-55-56-60-61-70-88-89\SC-13-54-55-56-60-61-70-88-89--14-68RAC 2020-10-21 09-37-14\SC-4-IE-90-10-DAD-1ML-15MIN.M (Sequence Method)
Last changed    : 4/5/2021 10:10:39 PM by SYSTEM
                 (modified after loading)
Additional Info : Peak(s) manually integrated
  
```

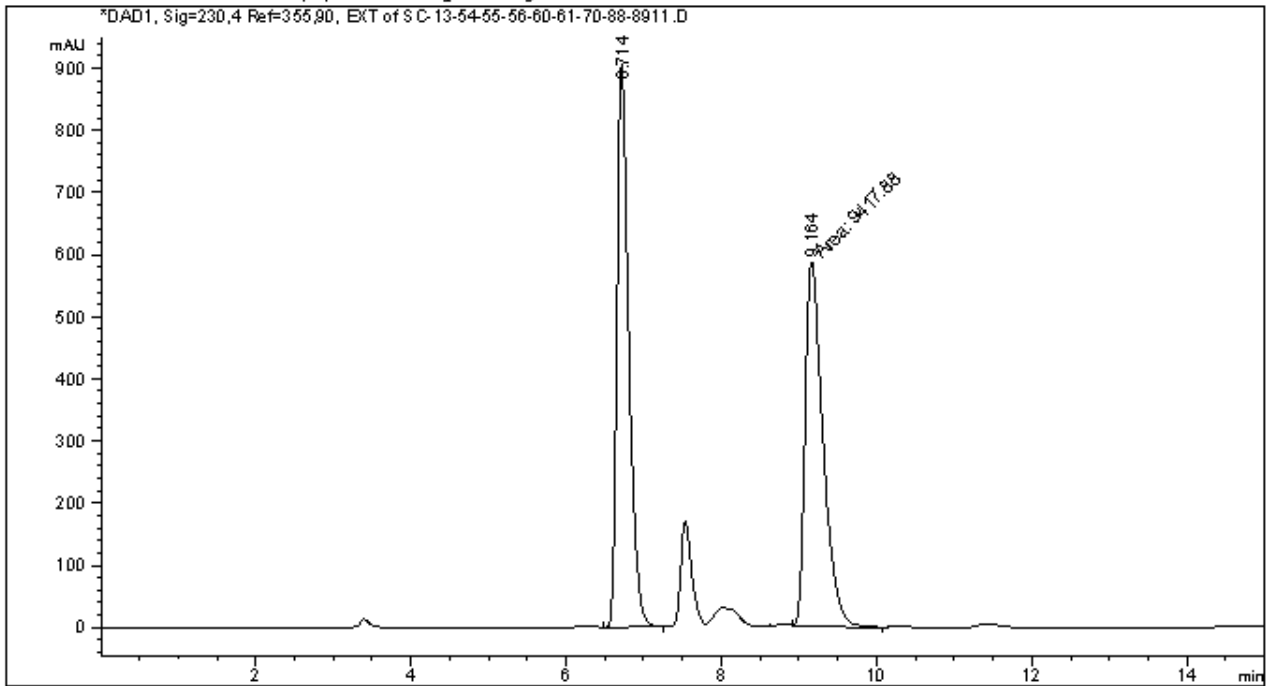

=====  
 Area Percent Report  
 =====

```

Sorted By      :      Signal
Multiplier     :      1.0000
Dilution       :      1.0000
Do not use Multiplier & Dilution Factor with ISTDs
  
```

```

Signal 1: DAD1, Sig=230,4 Ref=355,90, EXT
Signal has been modified after loading from rawdata file!
  
```

| Peak # | RetTime [min] | Type | Width [min] | Area [mAU*s] | Height [mAU] | Area %  |
|--------|---------------|------|-------------|--------------|--------------|---------|
| 1      | 6.714         | BB   | 0.1581      | 9551.91406   | 905.35913    | 50.3533 |
| 2      | 9.164         | FM   | 0.2671      | 9417.87891   | 587.76190    | 49.6467 |

```
Totals :                1.89698e4  1493.12103
```

```

=====
Acq. Operator   : SYSTEM                      Seq. Line :   23
Acq. Instrument : 1260                       Location  :   97
Injection Date  : 10/20/2020 8:26:06 AM      Inj       :    1
                                           Inj Volume: 5.000 µl
Acq. Method     : E:\DATA\SC\SC-13-54-55-56-60-61-70-88-89\SC-13-54-55-56-60-61-70-88-89 2020
                  -10-19 23-54-09\SC-4-IE-90-10-DAD-1ML-15MIN.M
Last changed    : 10/19/2020 11:54:09 PM by SYSTEM
Analysis Method : E:\DATA\SC\SC-13-54-55-56-60-61-70-88-89\SC-13-54-55-56-60-61-70-88-89 2020
                  -10-19 23-54-09\SC-4-IE-90-10-DAD-1ML-15MIN.M (Sequence Method)
Last changed    : 4/7/2021 5:48:47 PM by SYSTEM
                  (modified after loading)
Additional Info : Peak(s) manually integrated
  
```

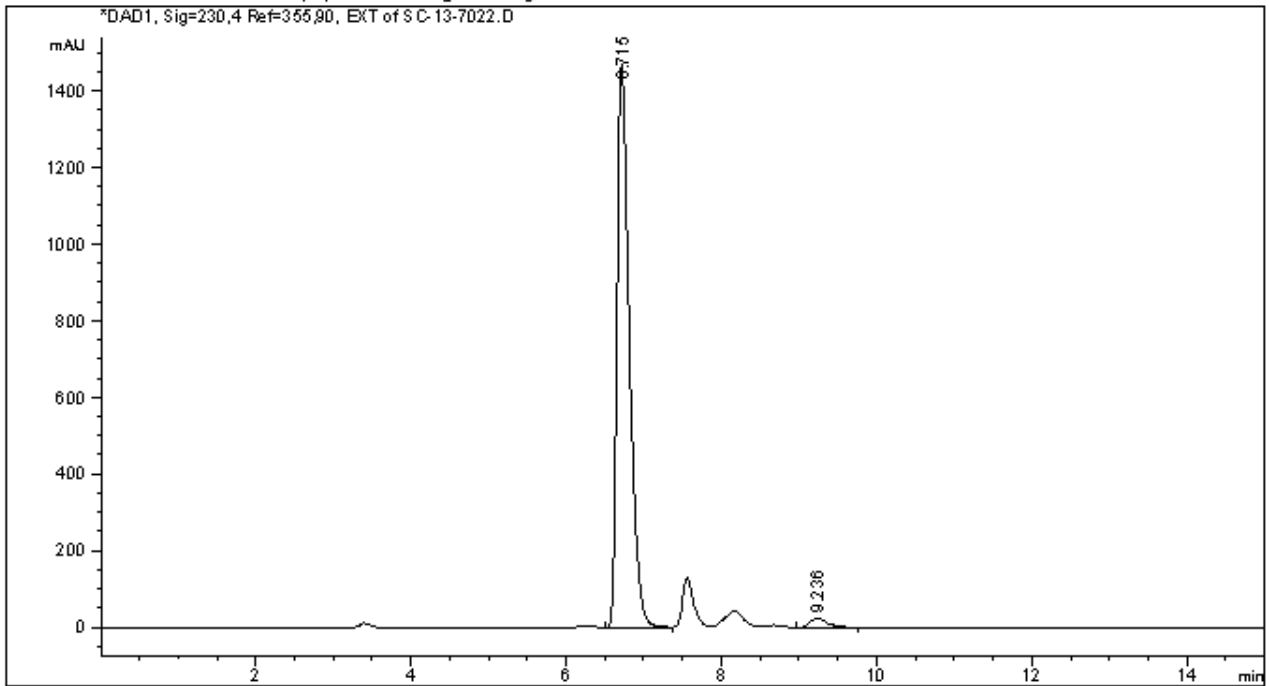

=====  
 Area Percent Report  
 =====

```

Sorted By      :      Signal
Multiplier     :      1.0000
Dilution       :      1.0000
Do not use Multiplier & Dilution Factor with ISTDs
  
```

Signal 1: DAD1, Sig=230,4 Ref=355,90, EXT  
 Signal has been modified after loading from rawdata file!

| Peak # | RetTime [min] | Type | Width [min] | Area [mAU*s] | Height [mAU] | Area %  |
|--------|---------------|------|-------------|--------------|--------------|---------|
| 1      | 6.715         | BB   | 0.1645      | 1.61862e4    | 1470.06201   | 97.8054 |
| 2      | 9.236         | BB   | 0.2234      | 363.18506    | 24.30026     | 2.1946  |

Totals :                    1.65493e4  1494.36227

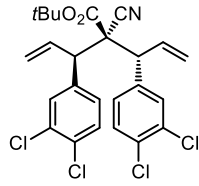

7m

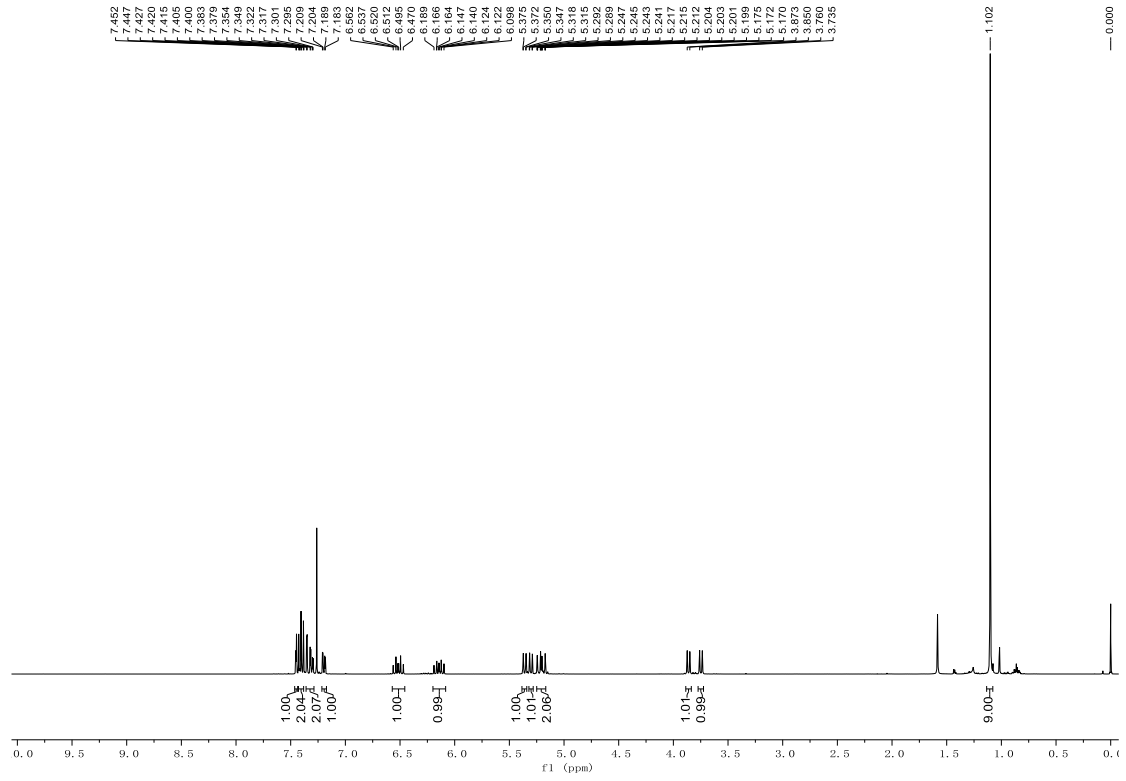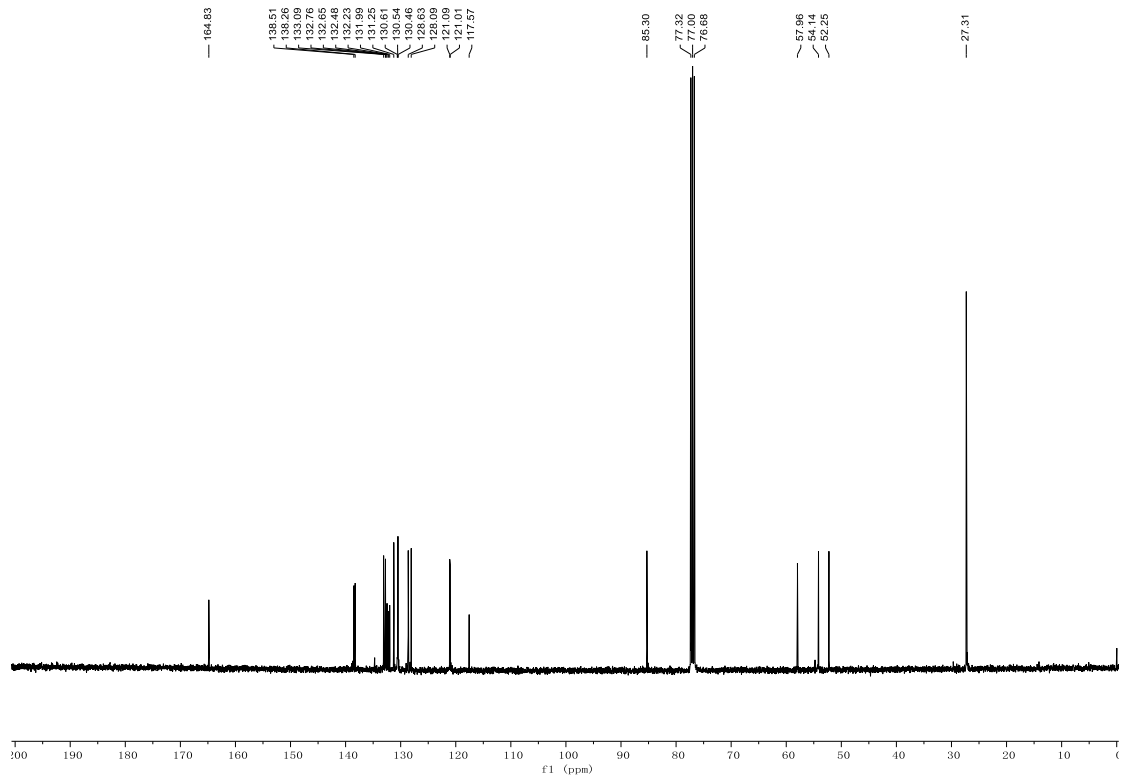

```

=====
Acq. Operator   : SYSTEM                      Seq. Line :    1
Acq. Instrument : 1260                       Location  :   92
Injection Date  : 6/27/2020 10:02:23 PM      Inj       :    1
                                           Inj Volume: 2.000 µl
Acq. Method     : E:\DATA\SC\SC-13-33\SC-13-33rac-IE-98 2020-06-27 22-01-01\SC-4-IE-98-2-DAD-
                  LML-20MIN-2UL.M
Last changed    : 6/27/2020 10:01:01 PM by SYSTEM
Analysis Method : E:\DATA\SC\SC-13-33\SC-13-33rac-IE-98 2020-06-27 22-01-01\SC-4-IE-98-2-DAD-
                  LML-20MIN-2UL.M (Sequence Method)
Last changed    : 4/5/2021 9:35:32 PM by SYSTEM
                  (modified after loading)
Additional Info : Peak(s) manually integrated
  
```

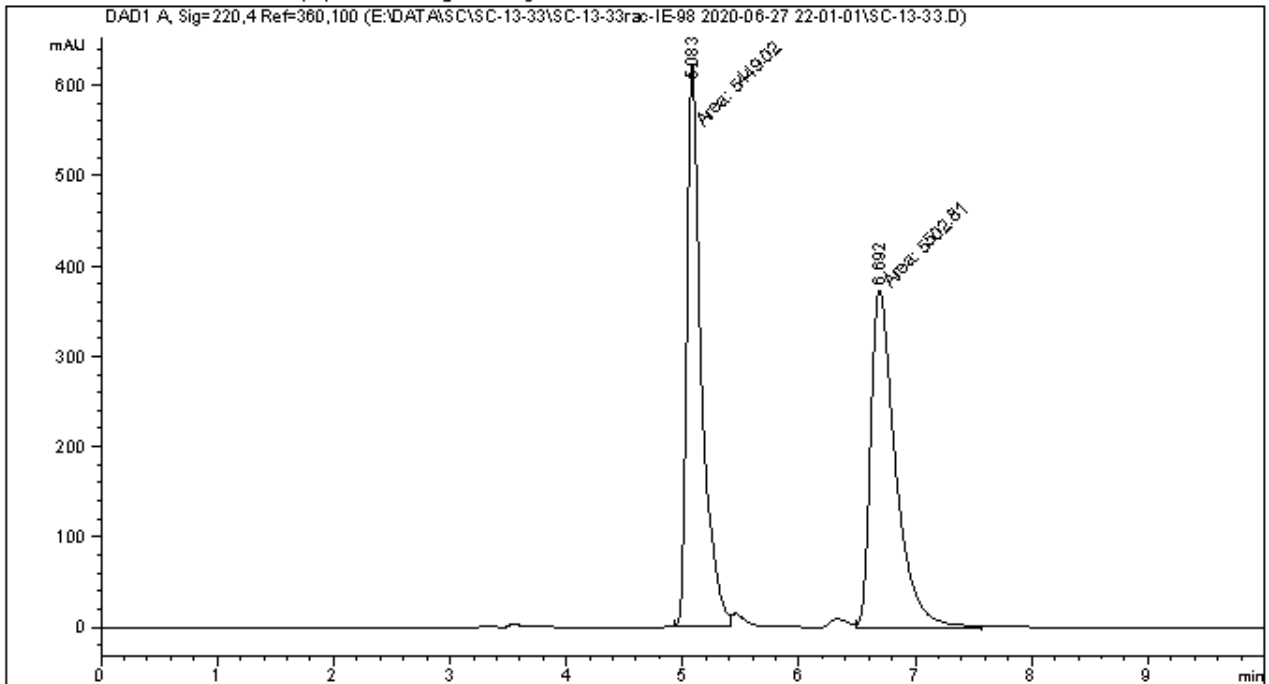

=====  
 Area Percent Report  
 =====

```

Sorted By      :      Signal
Multiplier     :      1.0000
Dilution       :      1.0000
Do not use Multiplier & Dilution Factor with ISTDs
  
```

Signal 1: DAD1 A, Sig=220,4 Ref=360,100

| Peak # | RetTime [min] | Type | Width [min] | Area [mAU*s] | Height [mAU] | Area %  |
|--------|---------------|------|-------------|--------------|--------------|---------|
| 1      | 5.083         | MM   | 0.1459      | 5449.01563   | 622.31415    | 49.7544 |
| 2      | 6.692         | MM   | 0.2461      | 5502.81201   | 372.69318    | 50.2456 |

Totals :                    1.09518e4    995.00732

```

=====
Acq. Operator   : SYSTEM                      Seq. Line :    2
Acq. Instrument : 1260                       Location  :   94
Injection Date  : 6/27/2020 10:38:55 PM      Inj       :    1
                                           Inj Volume: 2.000 µl
Acq. Method     : E:\DATA\SC\SC-13-33\SC-13-33 2020-06-27 22-26-05\SC-4-IE-98-2-DAD-1ML-10MIN
                  -2UL.M
Last changed    : 6/27/2020 10:26:05 PM by SYSTEM
Analysis Method : E:\DATA\SC\SC-13-33\SC-13-33 2020-06-27 22-26-05\SC-4-IE-98-2-DAD-1ML-10MIN
                  -2UL.M (Sequence Method)
Last changed    : 4/5/2021 9:39:01 PM by SYSTEM
                  (modified after loading)
Additional Info : Peak(s) manually integrated
  
```

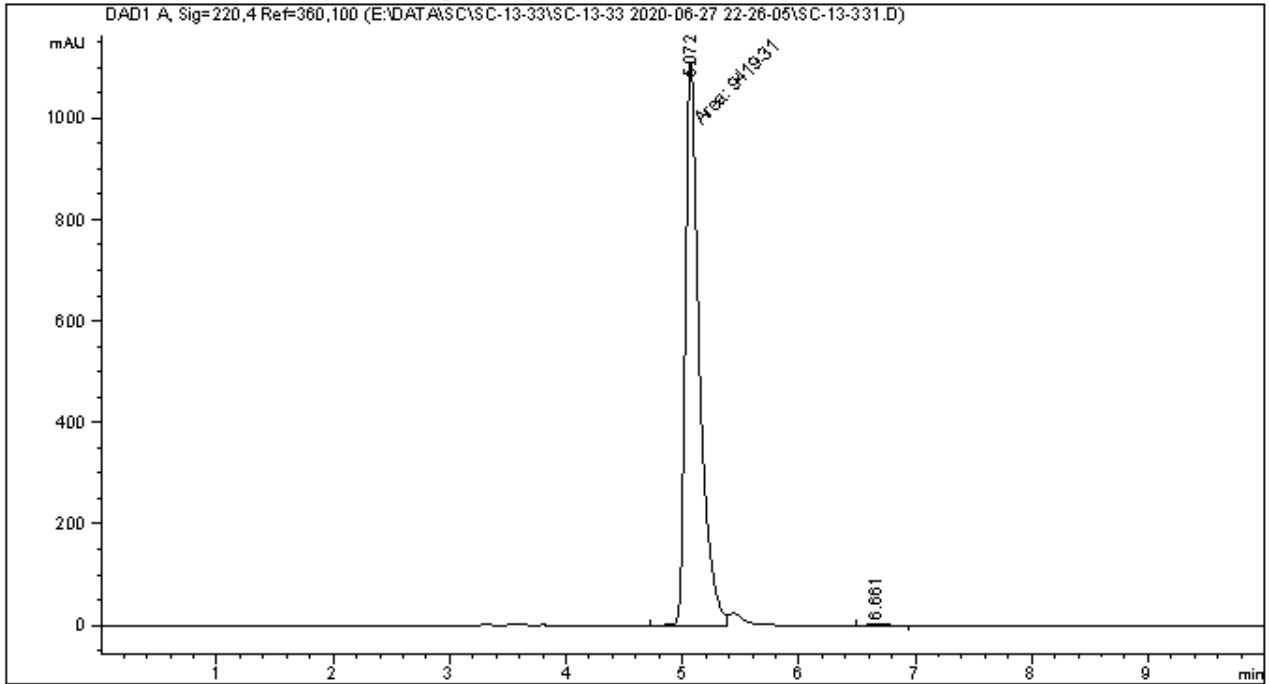

=====  
 Area Percent Report  
 =====

```

Sorted By      :      Signal
Multiplier     :      1.0000
Dilution       :      1.0000
Do not use Multiplier & Dilution Factor with ISTDs
  
```

Signal 1: DAD1 A, Sig=220,4 Ref=360,100

| Peak # | RetTime [min] | Type | Width [min] | Area [mAU*s] | Height [mAU] | Area %  |
|--------|---------------|------|-------------|--------------|--------------|---------|
| 1      | 5.072         | MF   | 0.1414      | 9419.30957   | 1110.15784   | 99.8016 |
| 2      | 6.661         | BB   | 0.1508      | 18.72850     | 1.51989      | 0.1984  |

Totals :                    9438.03807 1111.67772

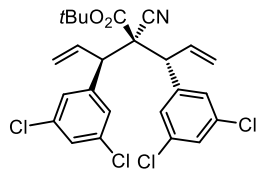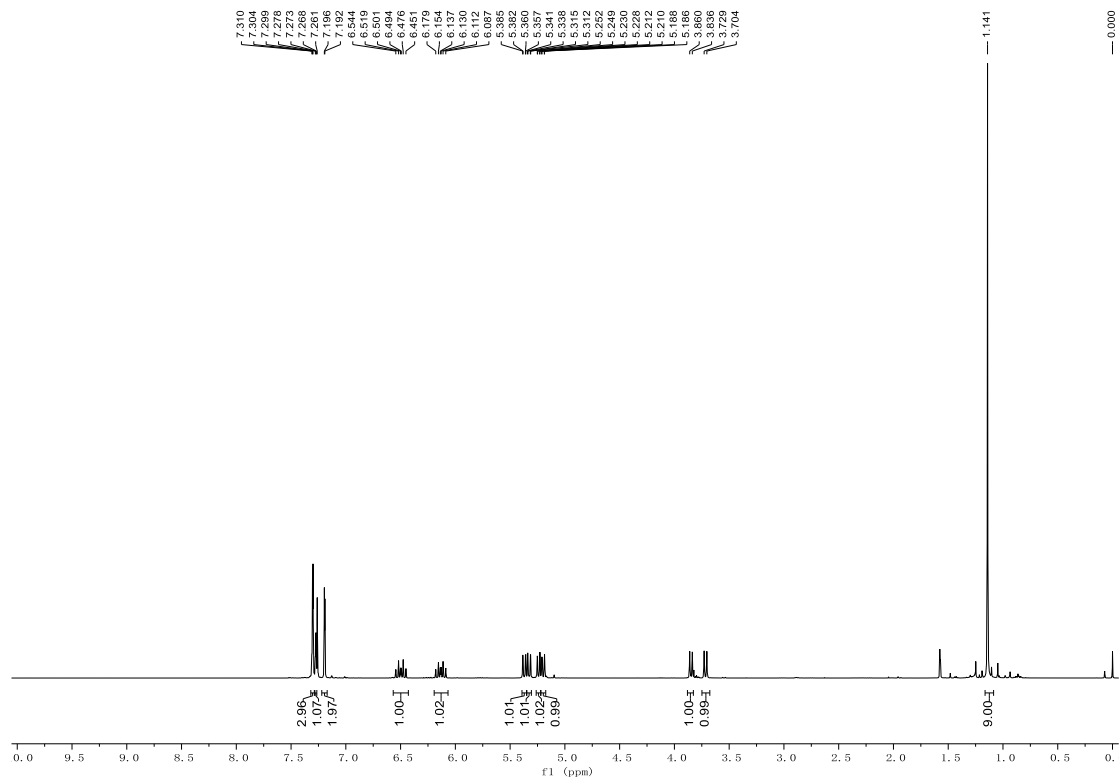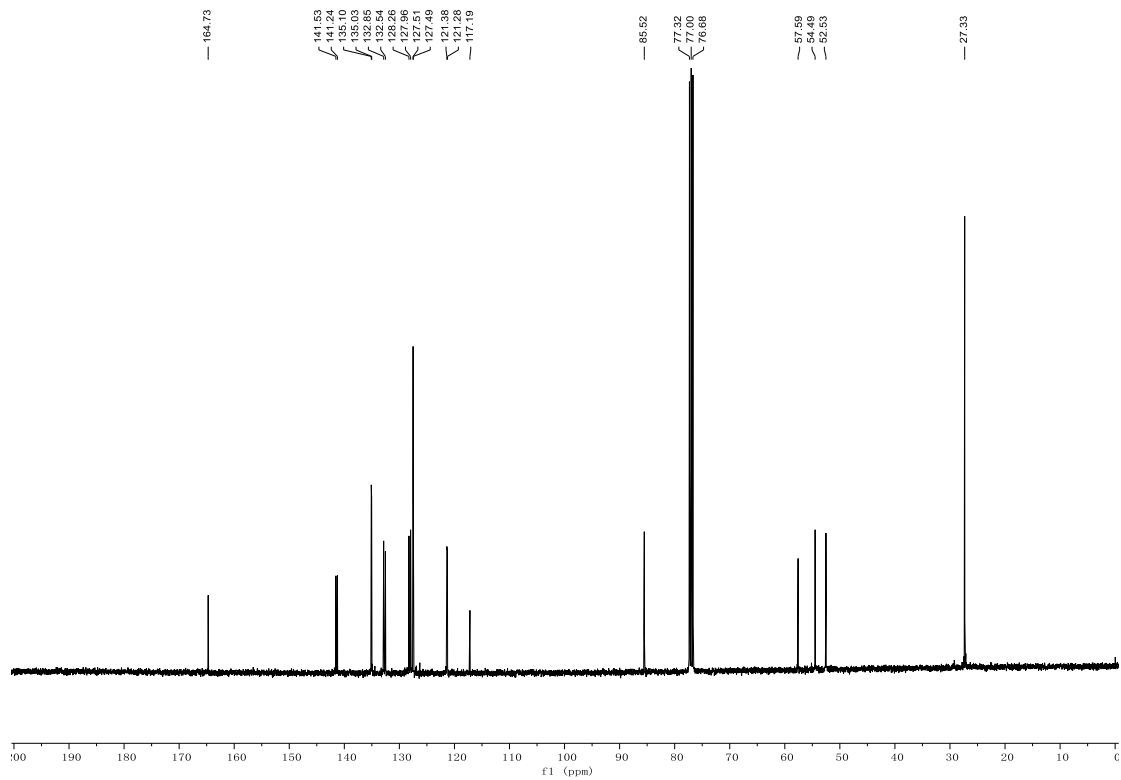

```

=====
Acq. Operator   : SYSTEM                      Seq. Line :    4
Acq. Instrument : 1260                        Location  :   97
Injection Date  : 11/24/2020 9:46:46 AM      Inj       :    1
                                           Inj Volume: 2.000 µl
Acq. Method     : E:\DATA\SC\SC-15-6\SC-15-6 2020-11-24 09-08-48\SC-4-IE-98-2-DAD-1ML-10MIN-
                2UL.M
Last changed    : 11/24/2020 9:44:46 AM by SYSTEM
Analysis Method : E:\DATA\SC\SC-15-6\SC-15-6 2020-11-24 09-08-48\SC-4-IE-98-2-DAD-1ML-10MIN-
                2UL.M (Sequence Method)
Last changed    : 4/7/2021 4:40:37 PM by SYSTEM
                (modified after loading)
Additional Info : Peak(s) manually integrated
  
```

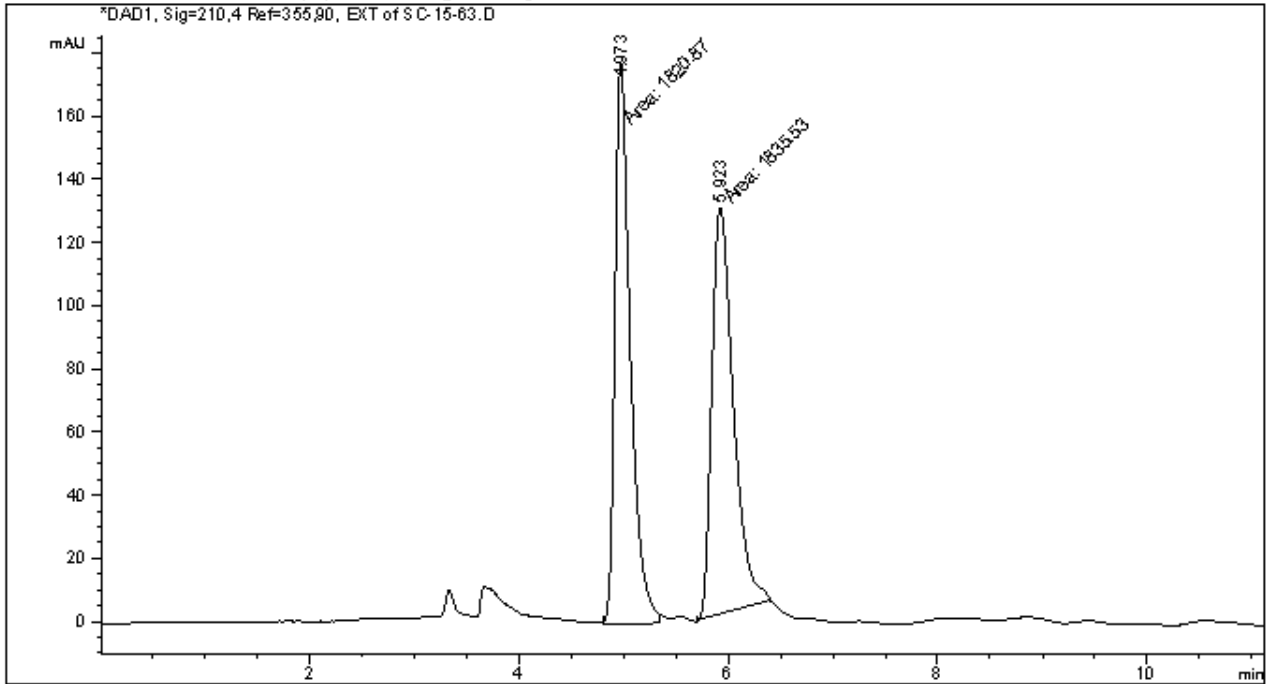

=====  
 Area Percent Report  
 =====

```

Sorted By      :      Signal
Multiplier     :      1.0000
Dilution      :      1.0000
Do not use Multiplier & Dilution Factor with ISTDs
  
```

Signal 1: DAD1, Sig=210,4 Ref=355,90, EXT  
 Signal has been modified after loading from rawdata file!

| Peak # | RetTime [min] | Type | Width [min] | Area [mAU*s] | Height [mAU] | Area %  |
|--------|---------------|------|-------------|--------------|--------------|---------|
| 1      | 4.973         | MM   | 0.1708      | 1820.86536   | 177.71632    | 49.7994 |
| 2      | 5.923         | MM   | 0.2377      | 1835.53308   | 128.68147    | 50.2006 |

Totals :                                    3656.39844   306.39780

Data File E:\DATA\SC\SC-15-6\SC-15-6 2020-11-24 09-08-48\SC-15-62.D  
 Sample Name: SC-15-6B

```

=====
Acq. Operator   : SYSTEM                      Seq. Line :    3
Acq. Instrument : 1260                        Location  :   99
Injection Date  : 11/24/2020 9:33:19 AM      Inj       :    1
                                           Inj Volume: 2.000 µl
Acq. Method     : E:\DATA\SC\SC-15-6\SC-15-6 2020-11-24 09-08-48\SC-4-IE-98-2-DAD-1ML-10MIN-
                2UL.M
Last changed    : 11/24/2020 9:44:46 AM by SYSTEM
                (modified after loading)
Analysis Method : E:\DATA\SC\SC-15-6\SC-15-6 2020-11-24 09-08-48\SC-4-IE-98-2-DAD-1ML-10MIN-
                2UL.M (Sequence Method)
Last changed    : 4/7/2021 4:40:37 PM by SYSTEM
                (modified after loading)
Additional Info  : Peak(s) manually integrated
=====
  
```

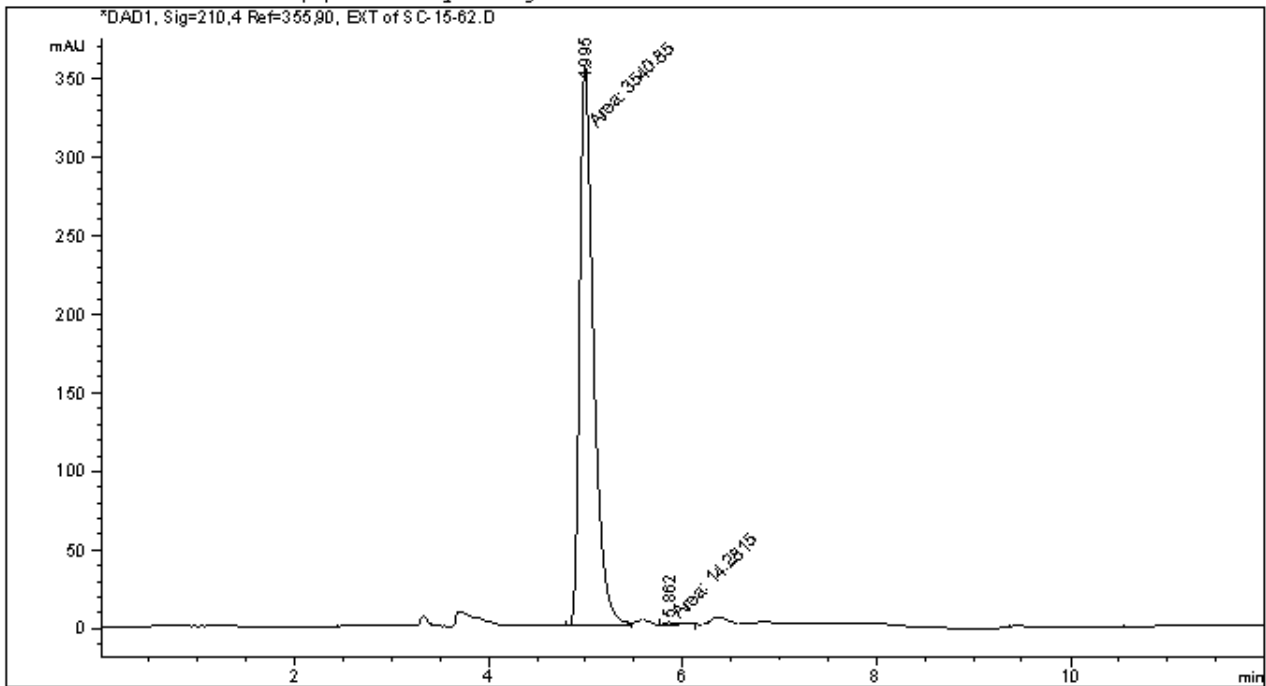

=====  
 Area Percent Report  
 =====

```

Sorted By      :      Signal
Multiplier     :      1.0000
Dilution      :      1.0000
Do not use Multiplier & Dilution Factor with ISTDs
  
```

Signal 1: DAD1, Sig=210,4 Ref=355,90, EXT  
 Signal has been modified after loading from rawdata file!

| Peak # | RetTime [min] | Type | Width [min] | Area [mAU*s] | Height [mAU] | Area %  |
|--------|---------------|------|-------------|--------------|--------------|---------|
| 1      | 4.995         | MF   | 0.1655      | 3540.85229   | 356.55188    | 99.5983 |
| 2      | 5.862         | MM   | 0.1810      | 14.28147     | 1.31520      | 0.4017  |



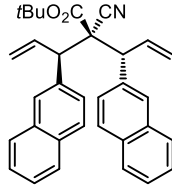

7o

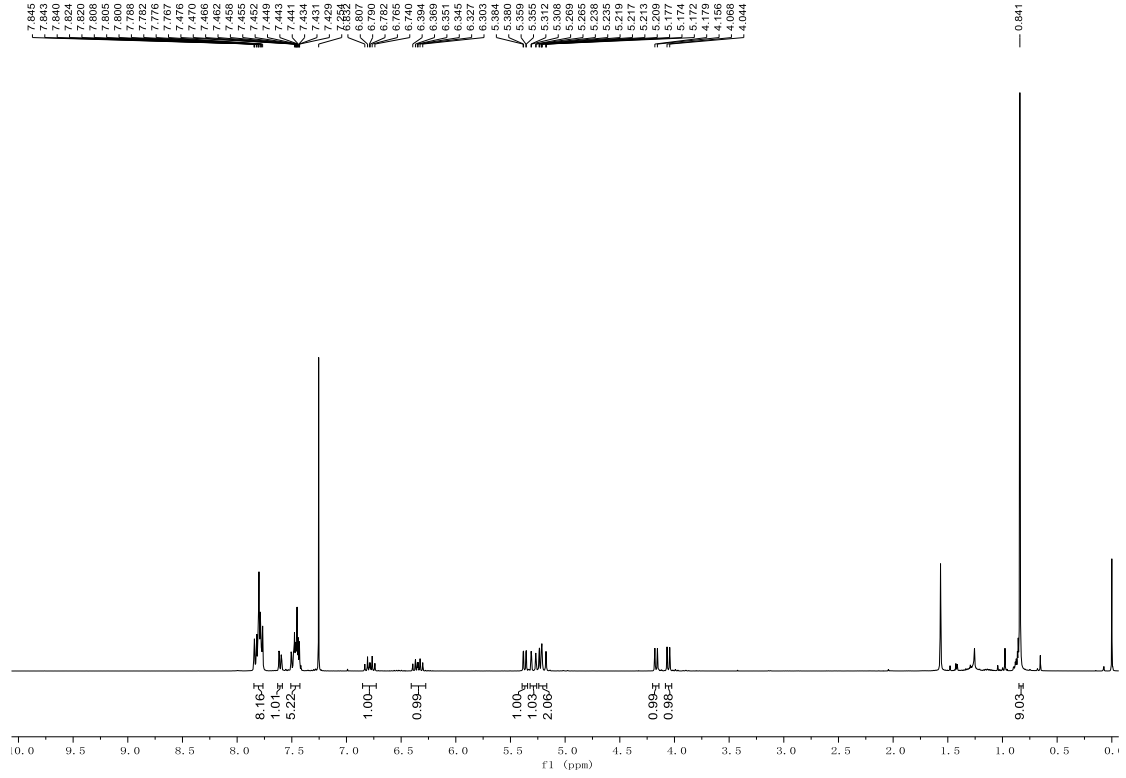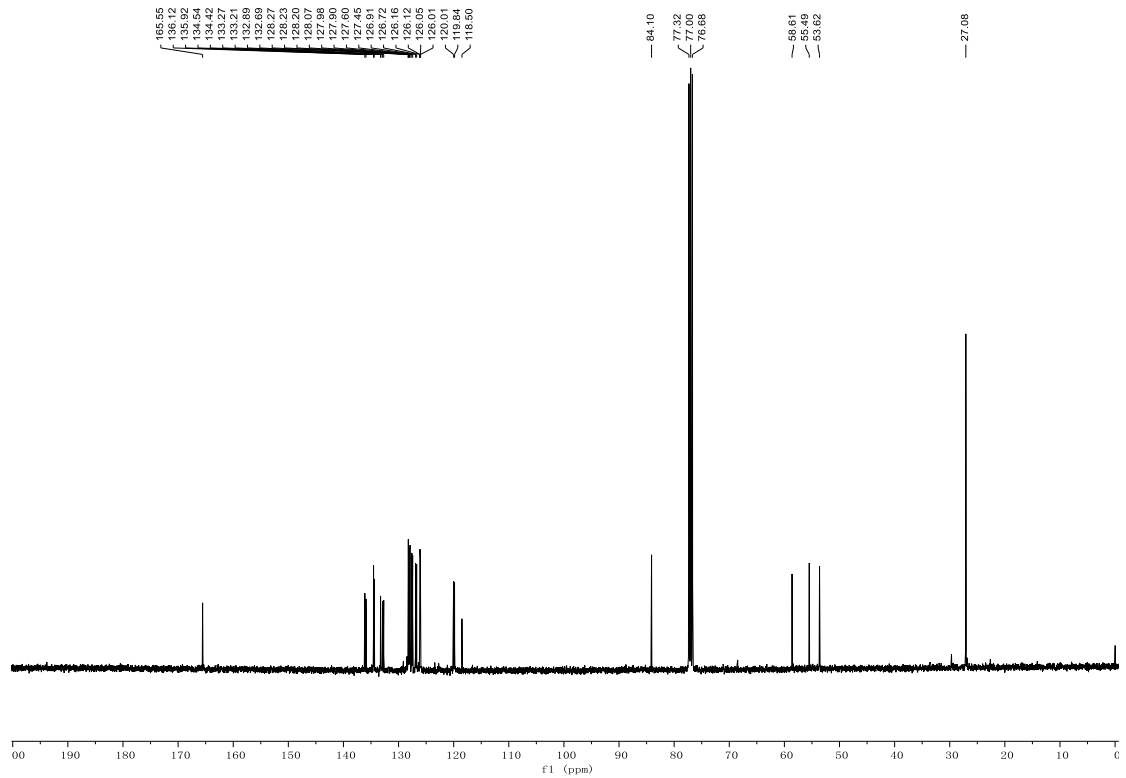

```

=====
Acq. Operator   : SYSTEM                      Seq. Line :   20
Acq. Instrument : 1260                      Location  :   87
Injection Date  : 4/6/2021 11:18:11 PM      Inj       :    1
                                           Inj Volume: 2.000 µl
Acq. Method     : E:\DATA\SC\SC-16-14-15_13-1-2-6-7-22-23 2021-04-06 18-00-44\SC-4-IE-98-2-
                  DAD-1ML-30MIN-2UL.M
Last changed    : 4/6/2021 6:00:45 PM by SYSTEM
Analysis Method : E:\DATA\SC\SC-16-14-15_13-1-2-6-7-22-23 2021-04-06 18-00-44\SC-4-IE-98-2-
                  DAD-1ML-30MIN-2UL.M (Sequence Method)
Last changed    : 4/7/2021 4:57:35 PM by SYSTEM
                  (modified after loading)
Additional Info : Peak(s) manually integrated
  
```

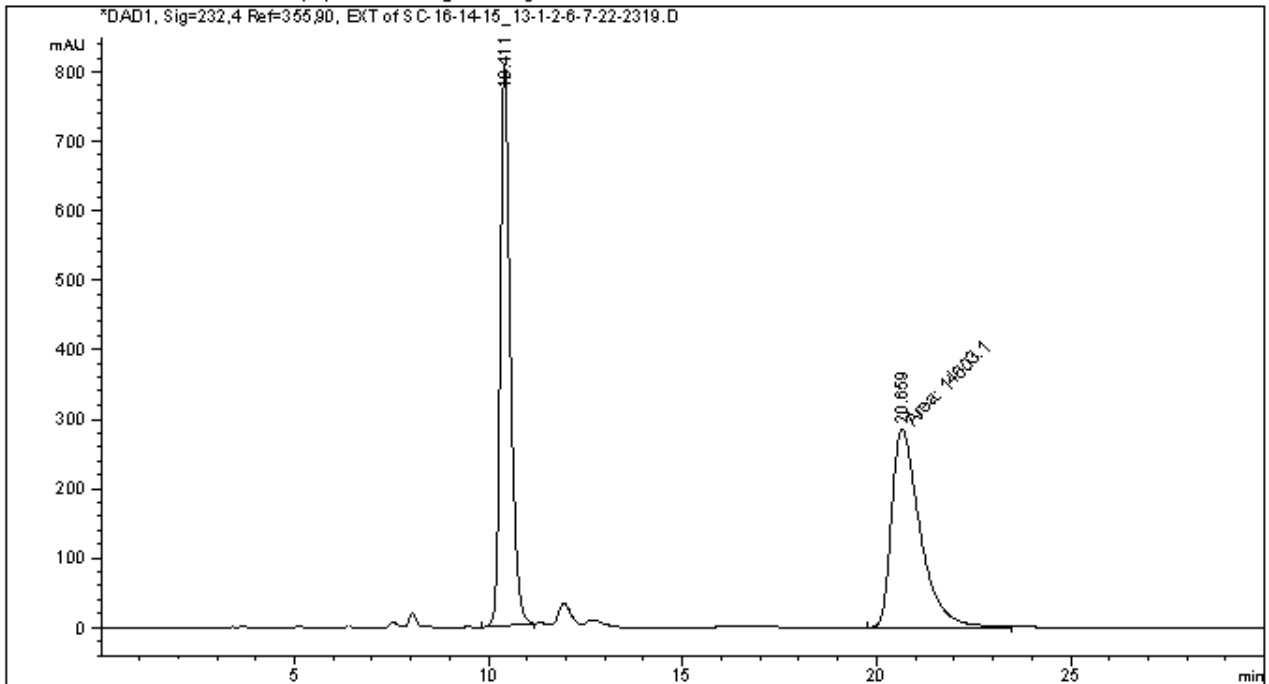

=====  
 Area Percent Report  
 =====

```

Sorted By      :      Signal
Multiplier     :      1.0000
Dilution       :      1.0000
Do not use Multiplier & Dilution Factor with ISTDs
  
```

Signal 1: DAD1, Sig=232,4 Ref=355,90, EXT  
 Signal has been modified after loading from rawdata file!

| Peak # | RetTime [min] | Type | Width [min] | Area [mAU*s] | Height [mAU] | Area %  |
|--------|---------------|------|-------------|--------------|--------------|---------|
| 1      | 10.411        | BB   | 0.2764      | 1.47660e4    | 807.28174    | 50.2772 |
| 2      | 20.659        | MM   | 0.8507      | 1.46031e4    | 286.10654    | 49.7228 |

Totals :                                    2.93691e4  1093.38828

```

=====
Acq. Operator   : SYSTEM                      Seq. Line :   11
Acq. Instrument : 1260                       Location  :    90
Injection Date  : 4/6/2021 8:15:43 PM        Inj       :    1
                                           Inj Volume: 2.000 µl
Acq. Method     : E:\DATA\SC\SC-16-14-15_13-1-2-6-7-22-23 2021-04-06 18-00-44\SC-4-IE-98-2-
                  DAD-1ML-30MIN-2UL.M
Last changed    : 4/6/2021 6:00:45 PM by SYSTEM
Analysis Method : E:\DATA\SC\SC-16-14-15_13-1-2-6-7-22-23 2021-04-06 18-00-44\SC-4-IE-98-2-
                  DAD-1ML-30MIN-2UL.M (Sequence Method)
Last changed    : 4/7/2021 4:57:35 PM by SYSTEM
                  (modified after loading)
Additional Info  : Peak(s) manually integrated
  
```

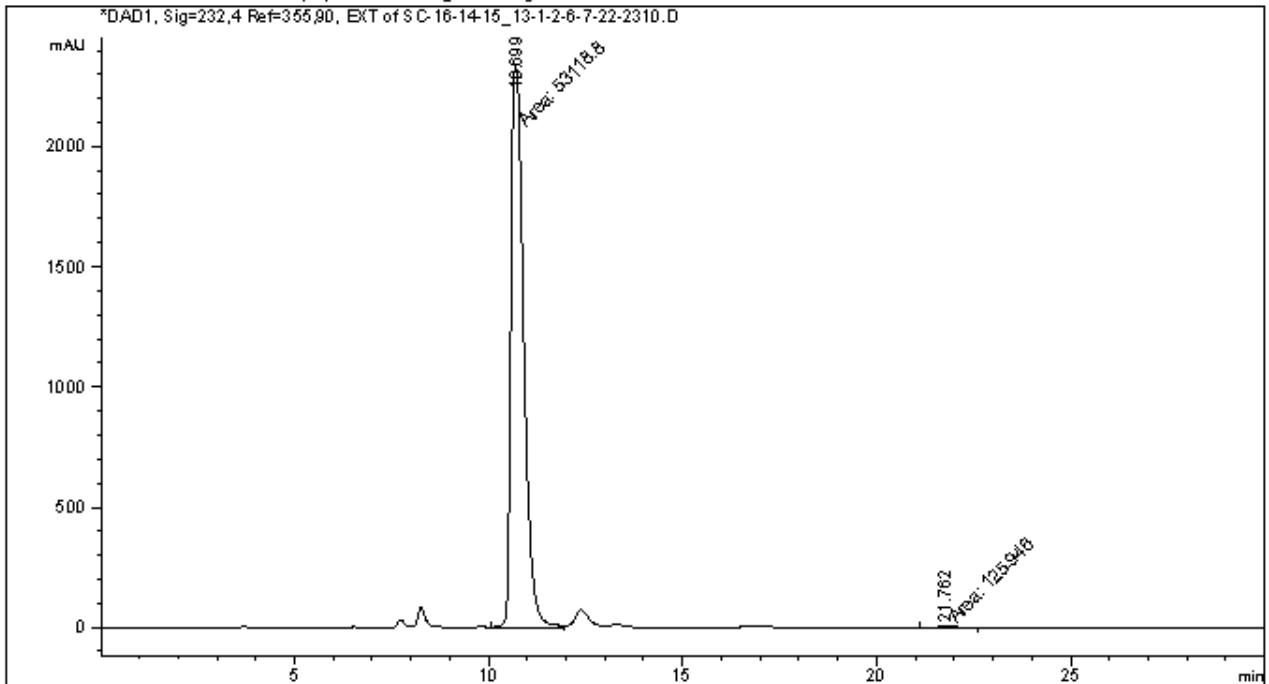

=====  
 Area Percent Report  
 =====

```

Sorted By      :      Signal
Multiplier     :      1.0000
Dilution       :      1.0000
Do not use Multiplier & Dilution Factor with ISTDs
  
```

Signal 1: DAD1, Sig=232,4 Ref=355,90, EXT  
 Signal has been modified after loading from rawdata file!

| Peak # | RetTime [min] | Type | Width [min] | Area [mAU*s] | Height [mAU] | Area %  |
|--------|---------------|------|-------------|--------------|--------------|---------|
| 1      | 10.699        | MF   | 0.3782      | 5.31188e4    | 2340.82568   | 99.7635 |
| 2      | 21.762        | MM   | 0.8464      | 125.94573    | 2.47996      | 0.2365  |

Totals :                    5.32448e4  2343.30564

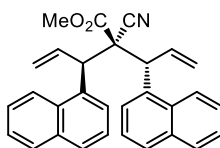

7p

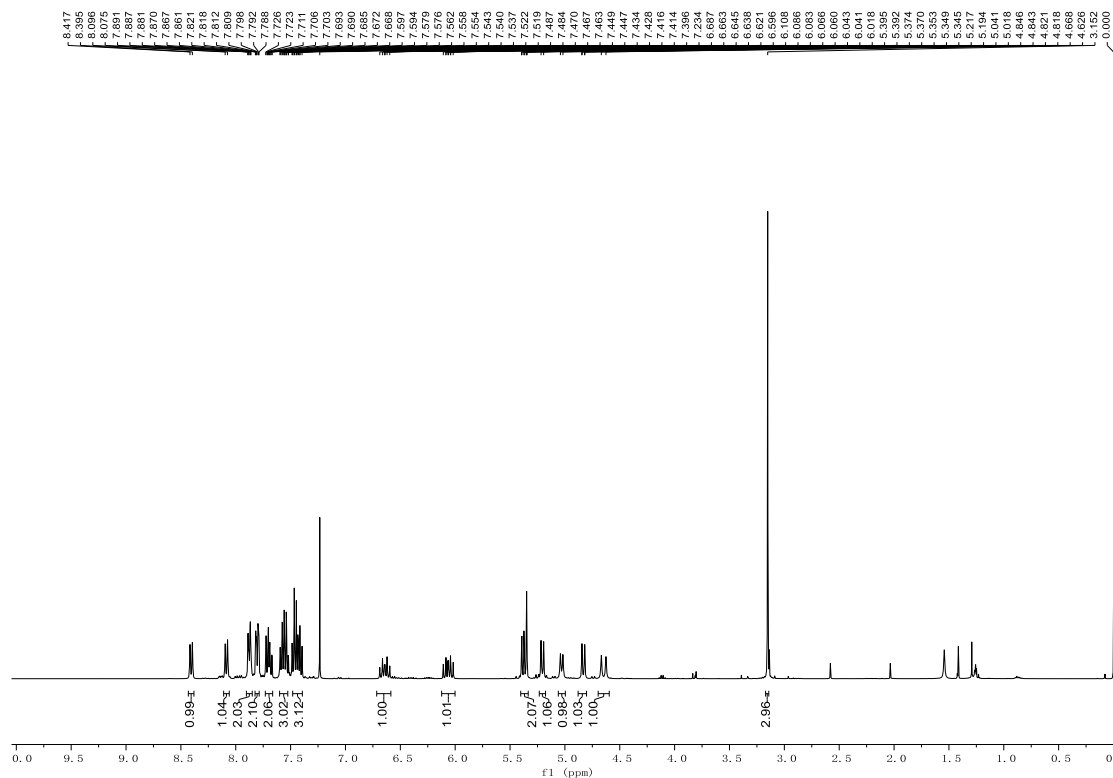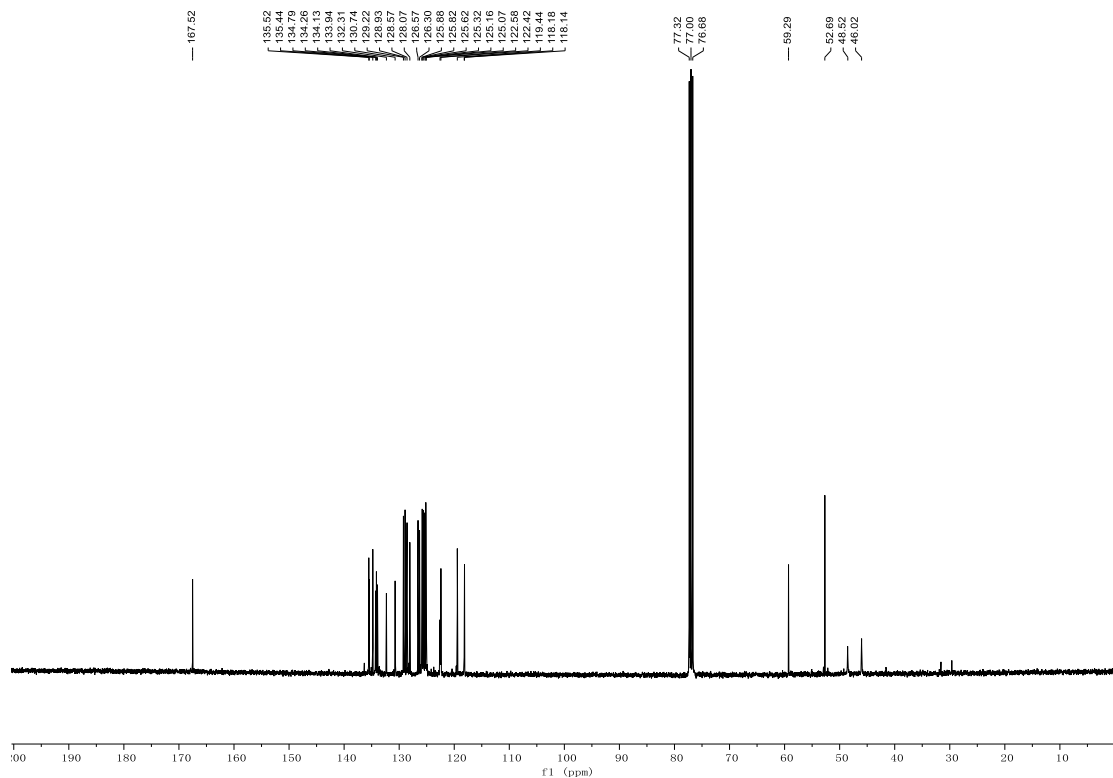

```

=====
Acq. Operator   : SYSTEM                      Seq. Line :   17
Acq. Instrument : 1260                      Location  :    89
Injection Date  : 10/21/2020 3:19:17 PM      Inj       :    1
                                           Inj Volume: 2.000 µl
Acq. Method     : E:\DATA\SC\SC-13-54-55-56-60-61-70-88-89\SC-13-54-55-56-60-61-70-88-89--14-68RAC 2020-10-21 09-37-14\SC-4-IE-98-2-DAD-1ML-30MIN-2UL.M
Last changed    : 10/21/2020 9:37:14 AM by SYSTEM
Analysis Method : E:\DATA\SC\SC-13-54-55-56-60-61-70-88-89\SC-13-54-55-56-60-61-70-88-89--14-68RAC 2020-10-21 09-37-14\SC-4-IE-98-2-DAD-1ML-30MIN-2UL.M (Sequence Method)
Last changed    : 4/5/2021 10:15:49 PM by SYSTEM
                 (modified after loading)
Additional Info  : Peak(s) manually integrated
  
```

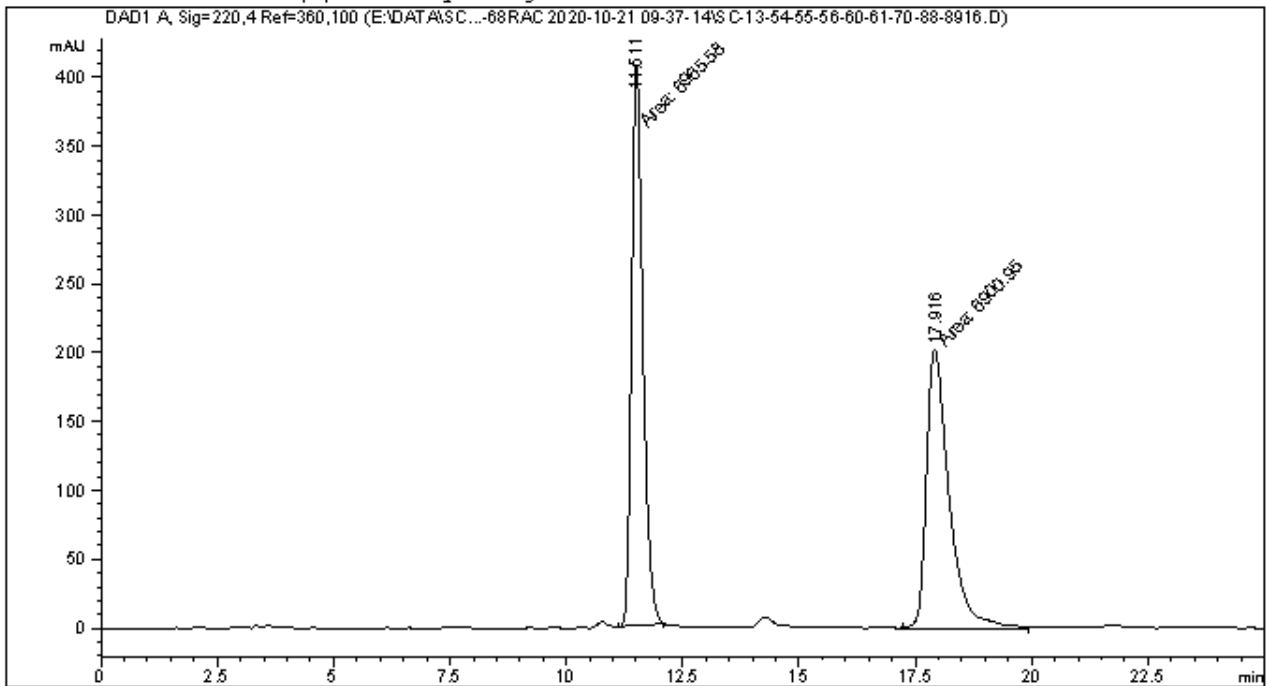

=====  
 Area Percent Report  
 =====

```

Sorted By      :      Signal
Multiplier     :      1.0000
Dilution       :      1.0000
Do not use Multiplier & Dilution Factor with ISTDs
  
```

Signal 1: DAD1 A, Sig=220,4 Ref=360,100

| Peak # | RetTime [min] | Type | Width [min] | Area [mAU*s] | Height [mAU] | Area %  |
|--------|---------------|------|-------------|--------------|--------------|---------|
| 1      | 11.511        | MM   | 0.2854      | 6965.58350   | 406.71854    | 50.2330 |
| 2      | 17.916        | MM   | 0.5670      | 6900.95313   | 202.86623    | 49.7670 |

Totals :                    1.38665e4    609.58476

```

=====
Acq. Operator   : SYSTEM                      Seq. Line :    2
Acq. Instrument : 1260                        Location  :   73
Injection Date  : 10/13/2020 8:10:59 PM      Inj       :    1
                                           Inj Volume: 2.000 µl
Acq. Method     : E:\DATA\SC\SC-14-68-72\SC-14-68-72 2020-10-13 19-43-11\SC-4-IE-98-2-DAD-1ML
                  -30MIN-2UL.M
Last changed    : 10/13/2020 8:07:08 PM by SYSTEM
Analysis Method : E:\DATA\SC\SC-14-68-72\SC-14-68-72 2020-10-13 19-43-11\SC-4-IE-98-2-DAD-1ML
                  -30MIN-2UL.M (Sequence Method)
Last changed    : 4/5/2021 10:14:47 PM by SYSTEM
                  (modified after loading)
Additional Info : Peak(s) manually integrated
  
```

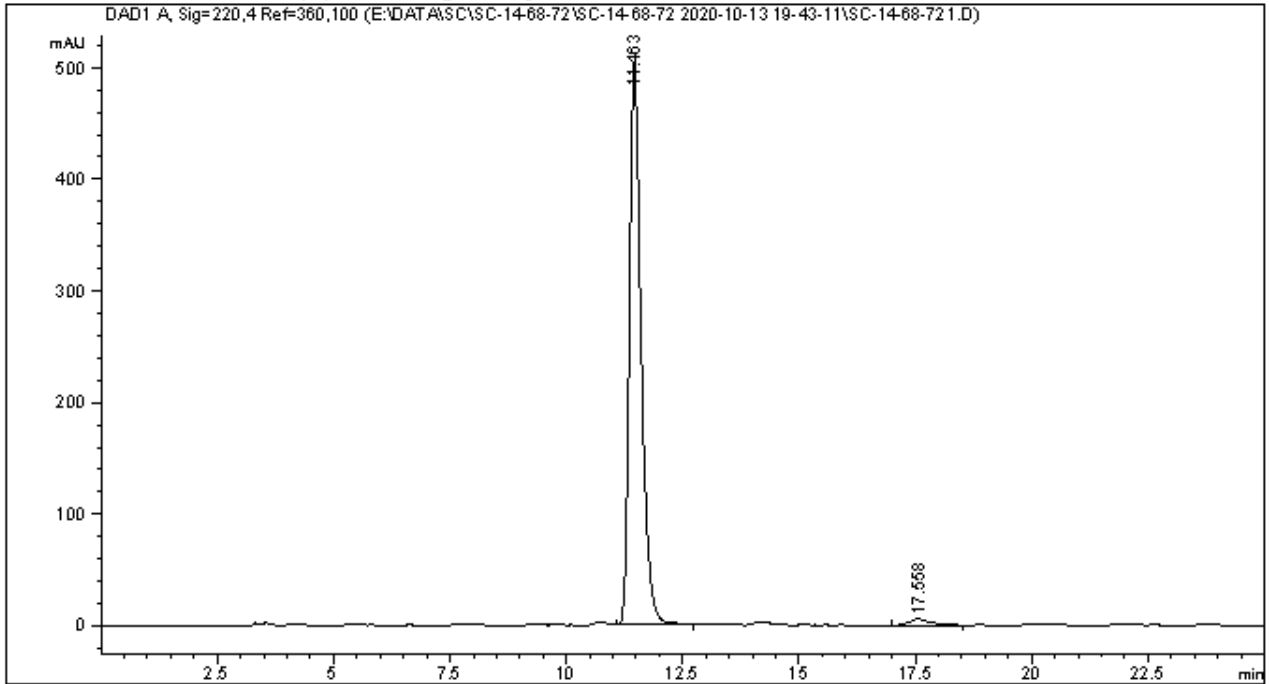

=====  
 Area Percent Report  
 =====

```

Sorted By      :      Signal
Multiplier     :      1.0000
Dilution      :      1.0000
Do not use Multiplier & Dilution Factor with ISTDs
  
```

Signal 1: DAD1 A, Sig=220,4 Ref=360,100

| Peak # | RetTime [min] | Type | Width [min] | Area [mAU*s] | Height [mAU] | Area %  |
|--------|---------------|------|-------------|--------------|--------------|---------|
| 1      | 11.463        | BB   | 0.2655      | 8922.01758   | 504.00177    | 98.1937 |
| 2      | 17.558        | BB   | 0.3642      | 164.12421    | 5.37574      | 1.8063  |

Totals :                    9086.14178   509.37751

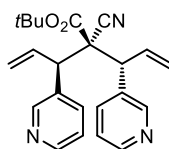

7q

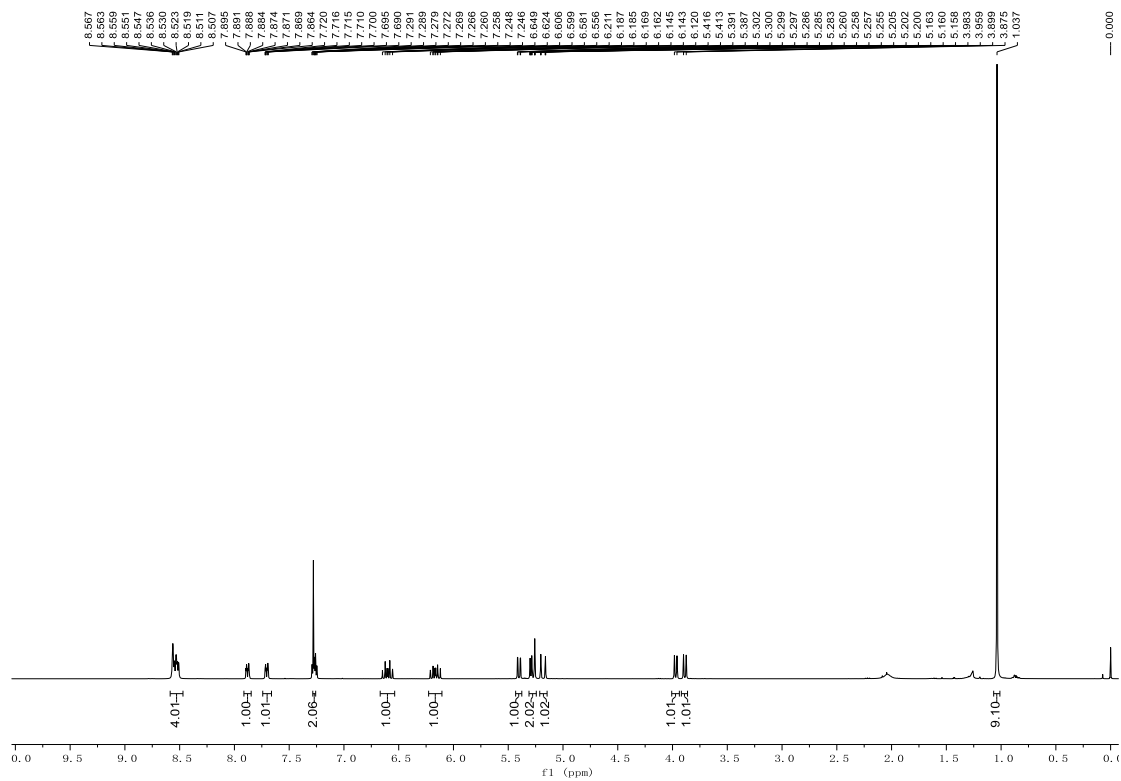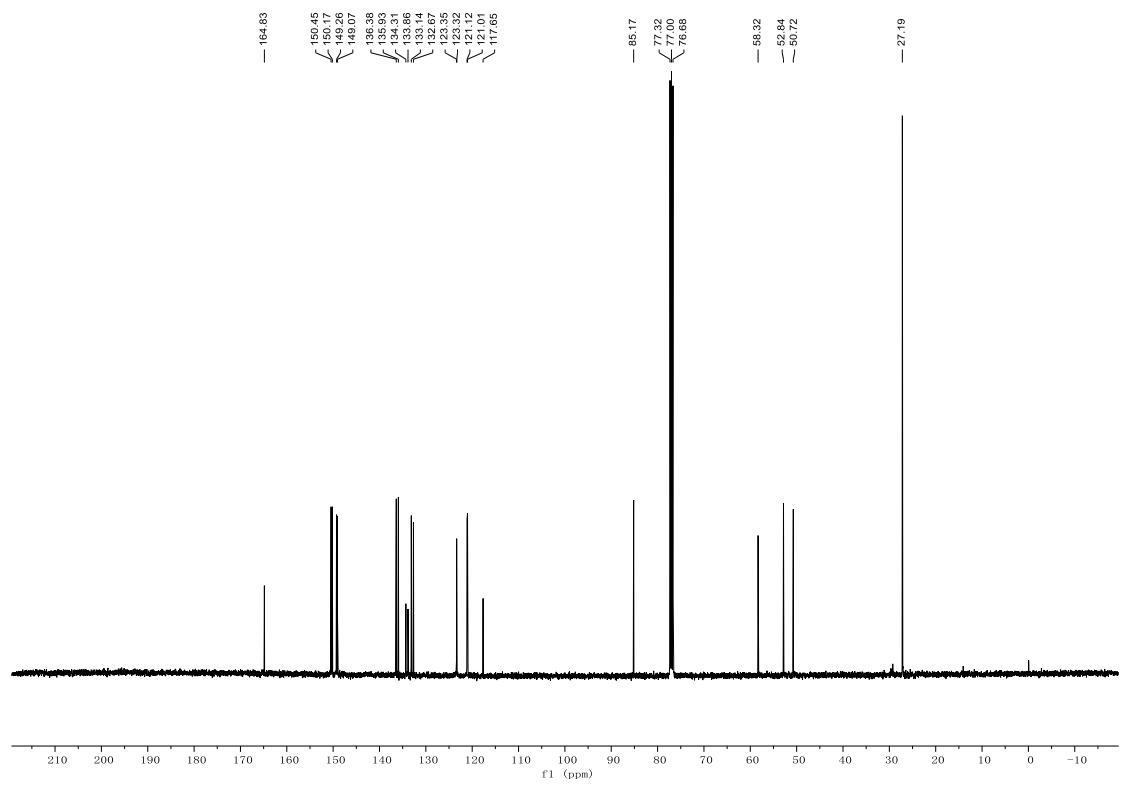

```

=====
Acq. Operator   : SYSTEM                      Seq. Line :    9
Acq. Instrument : 1260                        Location  :   86
Injection Date  : 10/21/2020 12:14:05 PM      Inj       :    1
                                           Inj Volume: 5.000 µl
Acq. Method     : E:\DATA\SC\SC-13-54-55-56-60-61-70-88-89\SC-13-54-55-56-60-61-70-88-89--14-68RAC 2020-10-21 09-37-14\SC-4-IE-80-20-DAD-1ML-50min.M
Last changed    : 10/21/2020 9:37:15 AM by SYSTEM
Analysis Method : E:\DATA\SC\SC-13-54-55-56-60-61-70-88-89\SC-13-54-55-56-60-61-70-88-89--14-68RAC 2020-10-21 09-37-14\SC-4-IE-80-20-DAD-1ML-50min.M (Sequence Method)
Last changed    : 4/5/2021 10:04:04 PM by SYSTEM
                  (modified after loading)
Additional Info : Peak(s) manually integrated
  
```

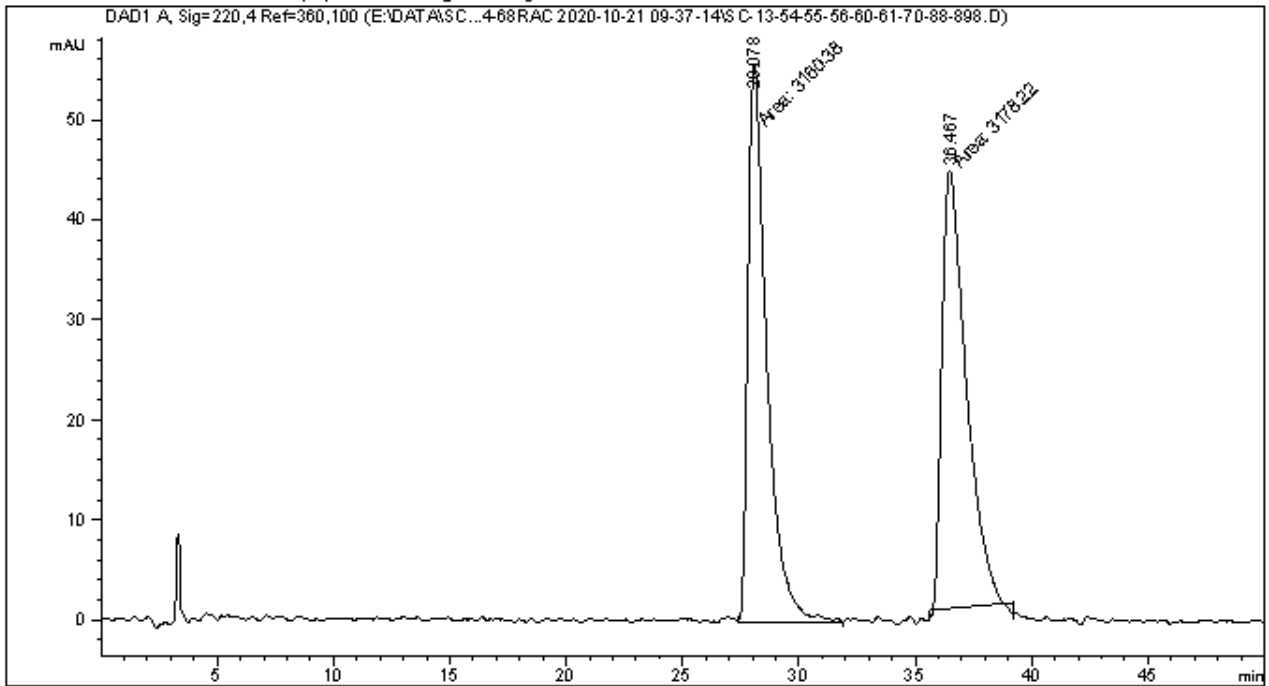

=====  
 Area Percent Report  
 =====

```

Sorted By      :      Signal
Multiplier     :      1.0000
Dilution       :      1.0000
Do not use Multiplier & Dilution Factor with ISTDs
  
```

Signal 1: DAD1 A, Sig=220,4 Ref=360,100

| Peak # | RetTime [min] | Type | Width [min] | Area [mAU*s] | Height [mAU] | Area %  |
|--------|---------------|------|-------------|--------------|--------------|---------|
| 1      | 28.078        | MM   | 0.9449      | 3160.38208   | 55.74611     | 49.8593 |
| 2      | 36.467        | MM   | 1.2106      | 3178.21851   | 43.75503     | 50.1407 |

Totals :                                    6338.60059    99.50114



```

=====
Acq. Operator   : SYSTEM                      Seq. Line :    2
Acq. Instrument : 1260                        Location  :   89
Injection Date  : 10/20/2020 12:47:14 AM      Inj       :    1
                                           Inj Volume: 5.000 µl
Acq. Method     : E:\DATA\SC\SC-13-54-55-56-60-61-70-88-89\SC-13-54-55-56-60-61-70-88-89 2020
                  -10-19 23-54-09\SC-4-IE-80-20-DAD-1ML-50min.M
Last changed    : 10/19/2020 11:54:09 PM by SYSTEM
Analysis Method : E:\DATA\SC\SC-13-54-55-56-60-61-70-88-89\SC-13-54-55-56-60-61-70-88-89 2020
                  -10-19 23-54-09\SC-4-IE-80-20-DAD-1ML-50min.M (Sequence Method)
Last changed    : 4/7/2021 5:40:09 PM by SYSTEM
                  (modified after loading)
Additional Info : Peak(s) manually integrated
  
```

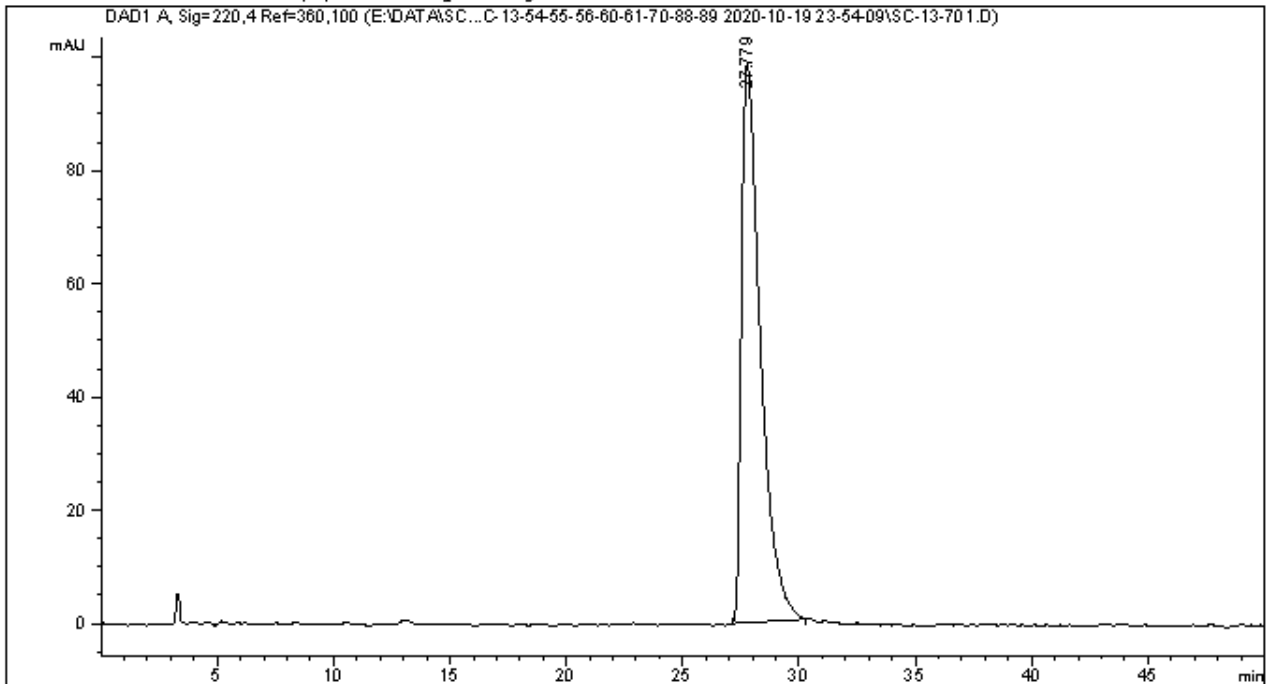

=====  
 Area Percent Report  
 =====

```

Sorted By      :      Signal
Multiplier     :      1.0000
Dilution       :      1.0000
Do not use Multiplier & Dilution Factor with ISTDs
  
```

Signal 1: DAD1 A, Sig=220,4 Ref=360,100

| Peak # | RetTime [min] | Type | Width [min] | Area [mAU*s] | Height [mAU] | Area %   |
|--------|---------------|------|-------------|--------------|--------------|----------|
| 1      | 27.799        | BB   | 0.7773      | 5584.47217   | 98.52300     | 100.0000 |

Totals :                      5584.47217    98.52300

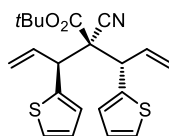

7r

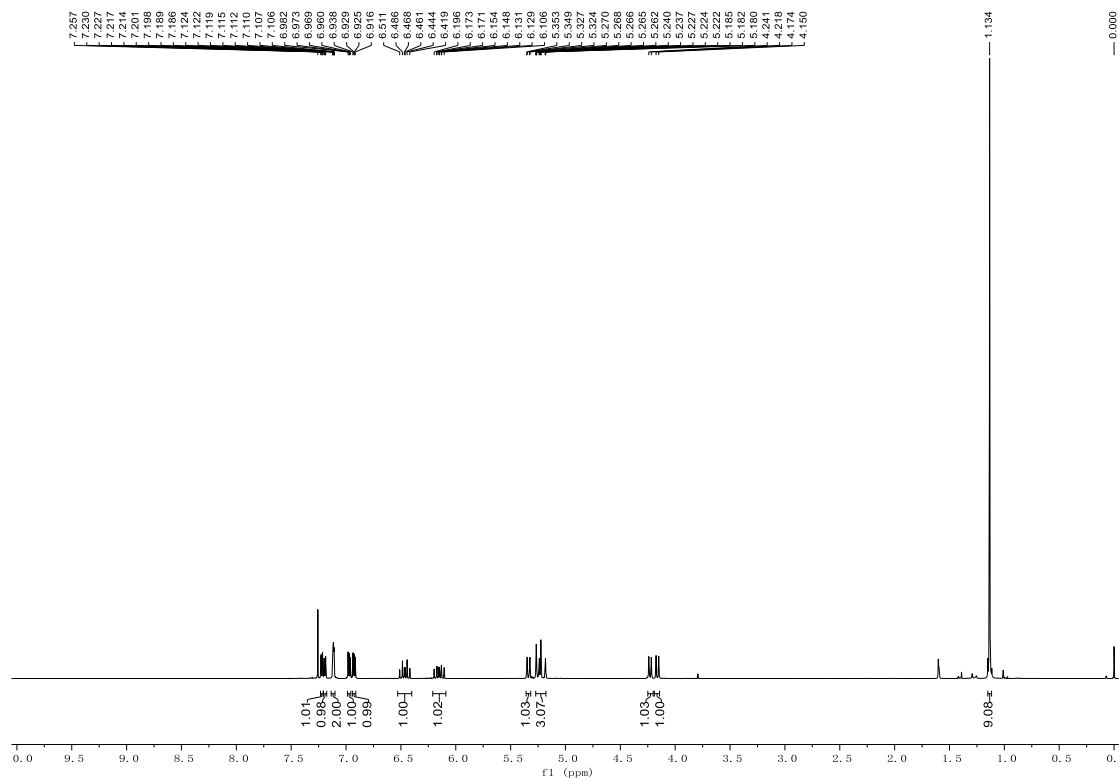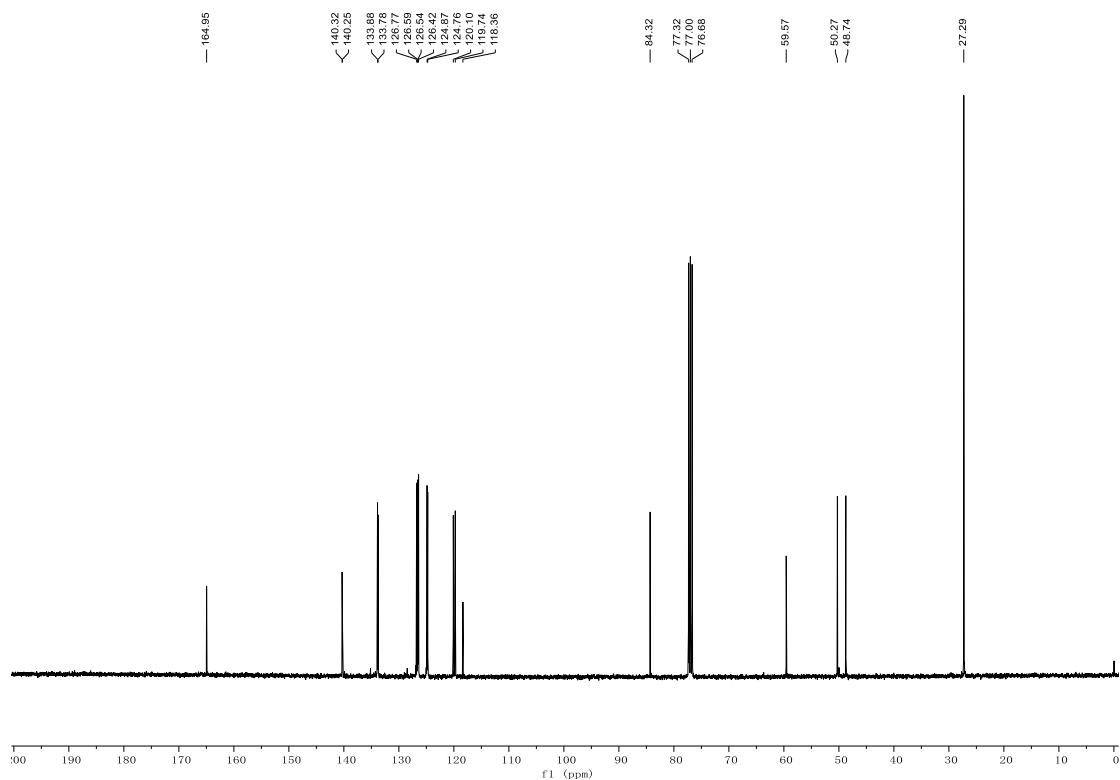

```

=====
Acq. Operator   : SYSTEM                      Seq. Line :    5
Acq. Instrument : 1260                        Location  :   85
Injection Date  : 10/21/2020 10:59:03 AM      Inj       :    1
                                           Inj Volume: 2.000 µl
Acq. Method     : E:\DATA\SC\SC-13-54-55-56-60-61-70-88-89\SC-13-54-55-56-60-61-70-88-89--14-68RAC 2020-10-21 09-37-14\SC-4-IE-99-1-DAD-1ML-20MIN-2UL.M
Last changed    : 10/21/2020 10:56:52 AM by SYSTEM
Analysis Method : E:\DATA\SC\SC-13-54-55-56-60-61-70-88-89\SC-13-54-55-56-60-61-70-88-89--14-68RAC 2020-10-21 09-37-14\SC-4-IE-99-1-DAD-1ML-20MIN-2UL.M (Sequence Method)
Last changed    : 4/5/2021 9:49:19 PM by SYSTEM
                  (modified after loading)
Additional Info  : Peak(s) manually integrated
  
```

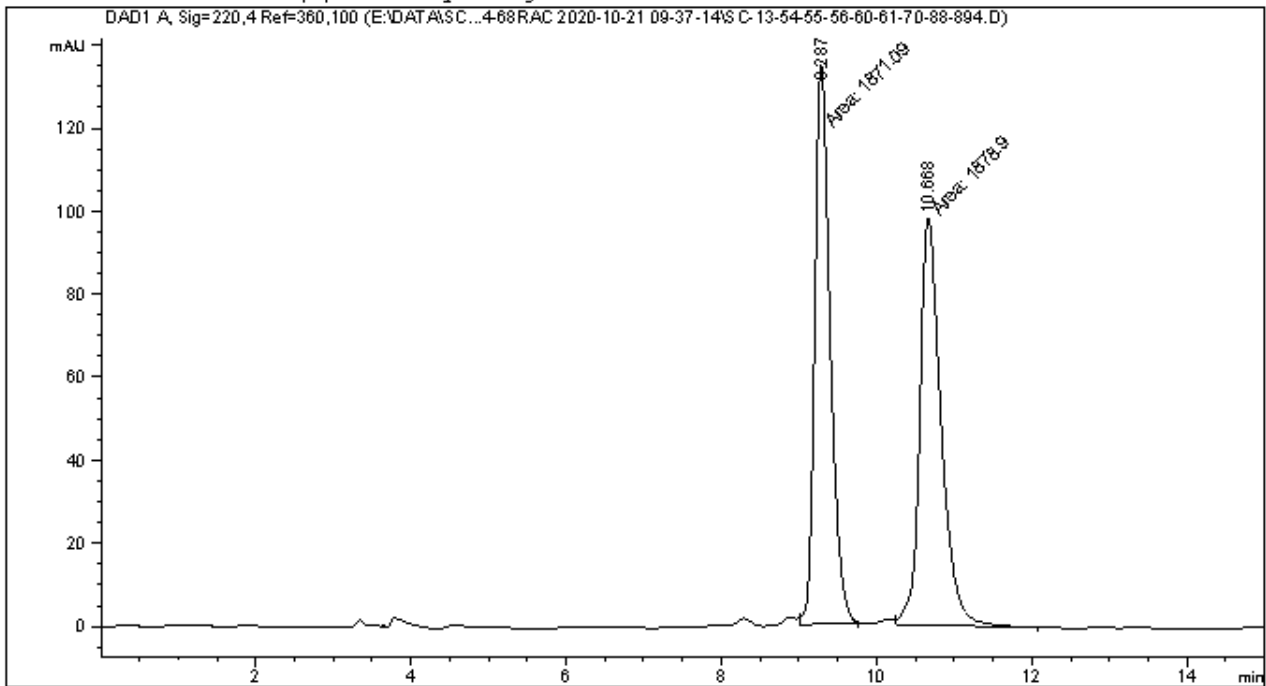

=====  
 Area Percent Report  
 =====

```

Sorted By      :      Signal
Multiplier     :      1.0000
Dilution       :      1.0000
Do not use Multiplier & Dilution Factor with ISTDs
  
```

Signal 1: DAD1 A, Sig=220,4 Ref=360,100

| Peak # | RetTime [min] | Type | Width [min] | Area [mAU*s] | Height [mAU] | Area %  |
|--------|---------------|------|-------------|--------------|--------------|---------|
| 1      | 9.287         | MM   | 0.2318      | 1871.09351   | 134.53082    | 49.8959 |
| 2      | 10.668        | FM   | 0.3194      | 1878.90137   | 98.04790     | 50.1041 |

Totals :                            3749.99487    232.57872

```

=====
Acq. Operator   : SYSTEM                      Seq. Line :   18
Acq. Instrument : 1260                       Location  :    86
Injection Date  : 10/20/2020 6:59:23 AM      Inj       :    1
                                           Inj Volume: 2.000 µl
Acq. Method     : E:\DATA\SC\SC-13-54-55-56-60-61-70-88-89\SC-13-54-55-56-60-61-70-88-89 2020
                  -10-19 23-54-09\SC-4-IE-99-1-DAD-1ML-20MIN-2UL.M
Last changed    : 10/19/2020 11:54:09 PM by SYSTEM
Analysis Method : E:\DATA\SC\SC-13-54-55-56-60-61-70-88-89\SC-13-54-55-56-60-61-70-88-89 2020
                  -10-19 23-54-09\SC-4-IE-99-1-DAD-1ML-20MIN-2UL.M (Sequence Method)
Last changed    : 4/7/2021 5:38:43 PM by SYSTEM
                  (modified after loading)
Additional Info : Peak(s) manually integrated
  
```

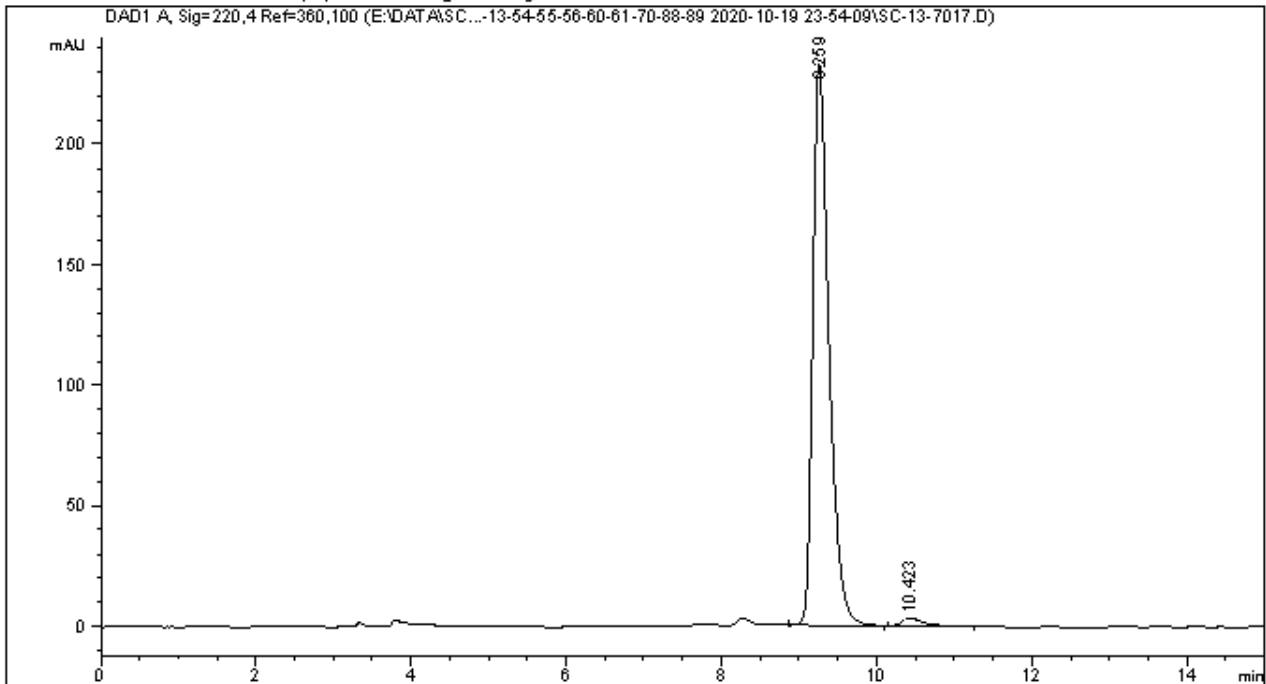

=====  
 Area Percent Report  
 =====

```

Sorted By      :      Signal
Multiplier     :      1.0000
Dilution       :      1.0000
Do not use Multiplier & Dilution Factor with ISTDs
  
```

Signal 1: DAD1 A, Sig=220,4 Ref=360,100

| Peak # | RetTime [min] | Type | Width [min] | Area [mAU*s] | Height [mAU] | Area %  |
|--------|---------------|------|-------------|--------------|--------------|---------|
| 1      | 9.259         | BB   | 0.2172      | 3372.66626   | 232.52678    | 98.1224 |
| 2      | 10.423        | BB   | 0.2561      | 64.53595     | 3.39007      | 1.8776  |

Totals :                    3437.20221   235.91685

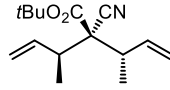

7s

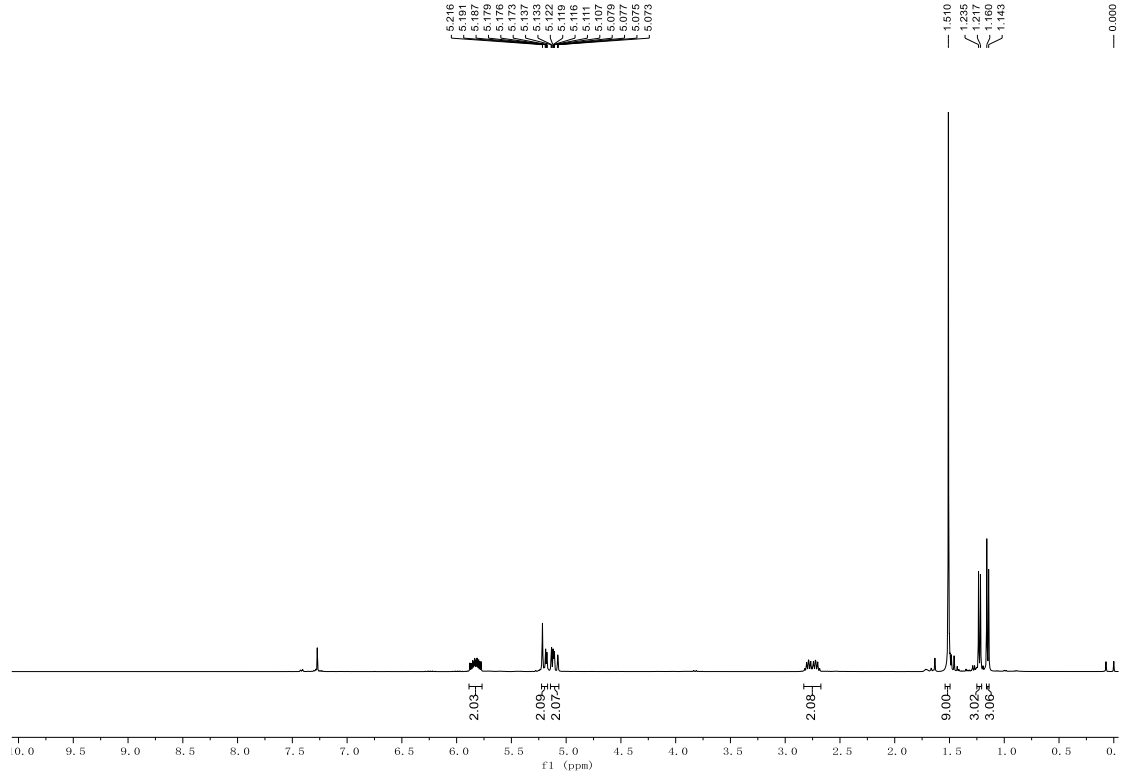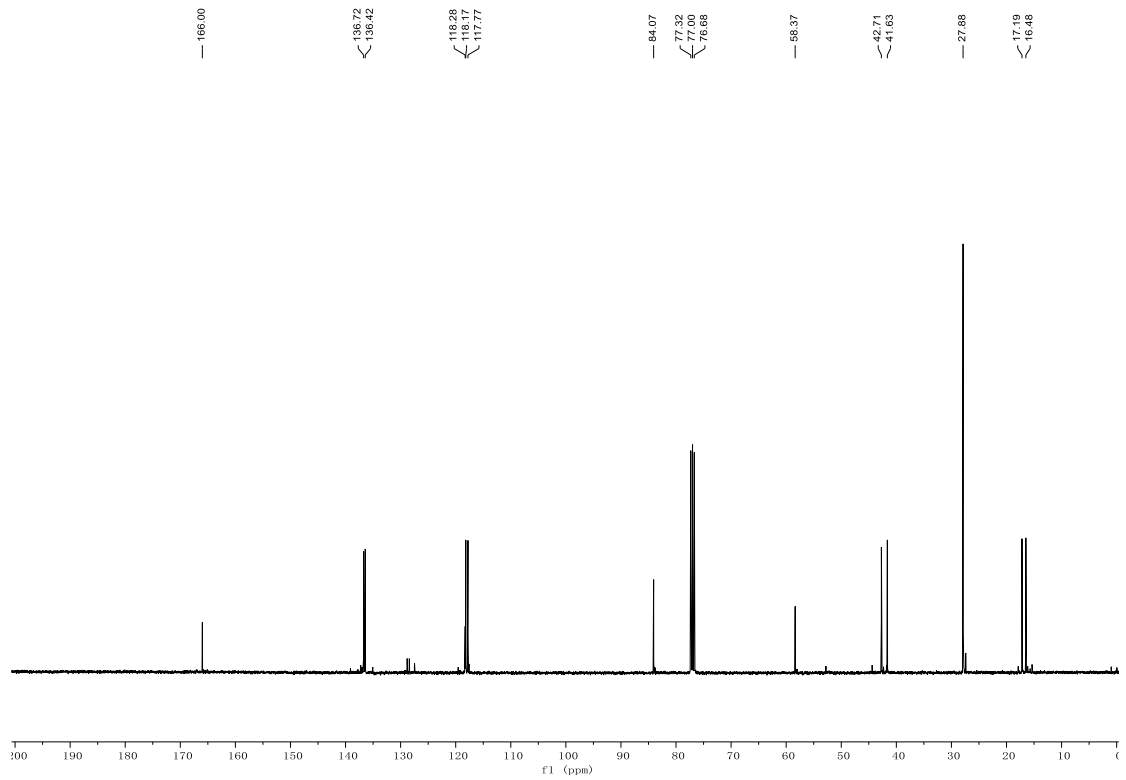

```

=====
Acq. Operator   : SYSTEM                      Seq. Line :    1
Acq. Instrument : 1260                        Location  :   82
Injection Date  : 5/13/2021 10:53:58 AM      Inj       :    1
                                           Inj Volume: 5.000 µl
Acq. Method     : E:\DATA\SC\SC-16-33\SC-16-33-RAC 2021-05-13 10-52-29\SC-5-0JH-98-2-DAD-1ML-20MIN.M
Last changed    : 5/13/2021 10:52:29 AM by SYSTEM
Analysis Method : E:\DATA\SC\SC-16-33\SC-16-33-RAC 2021-05-13 10-52-29\SC-5-0JH-98-2-DAD-1ML-20MIN.M (Sequence Method)
Last changed    : 5/13/2021 11:11:41 AM by SYSTEM
                 (modified after loading)
Additional Info : Peak(s) manually integrated
  
```

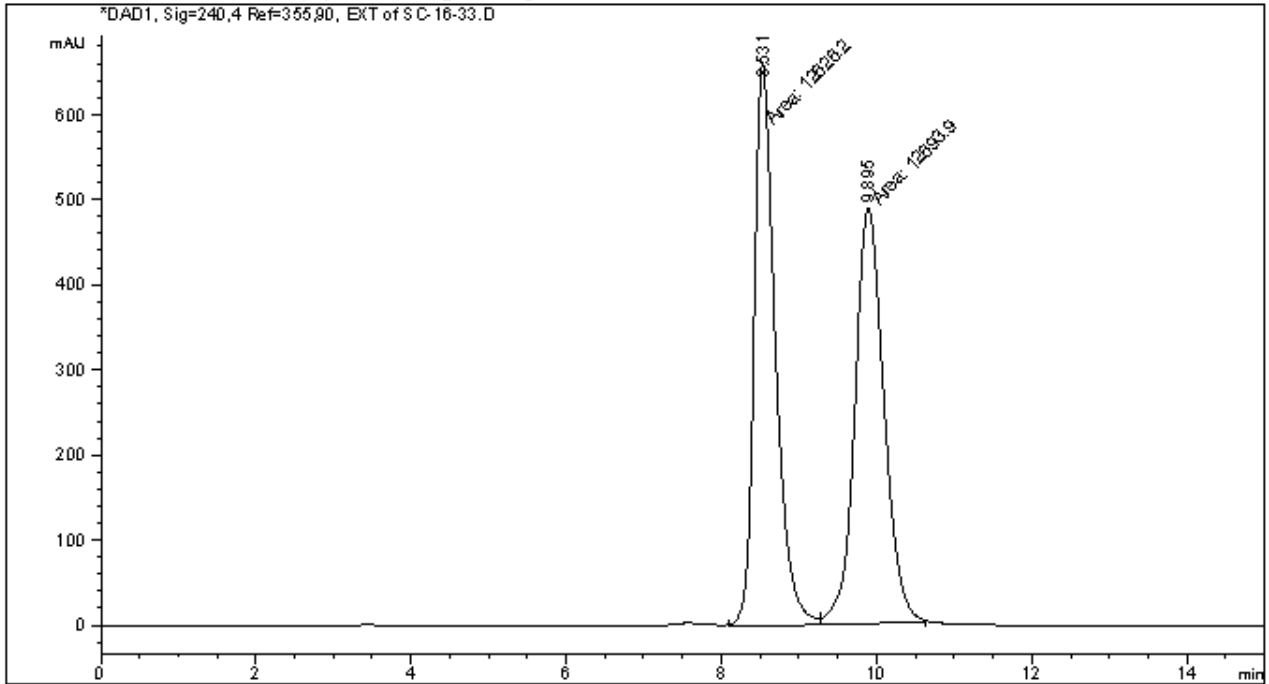

=====  
 Area Percent Report  
 =====

```

Sorted By      :      Signal
Multiplier     :      1.0000
Dilution       :      1.0000
Do not use Multiplier & Dilution Factor with ISTDs
  
```

Signal 1: DAD1, Sig=240,4 Ref=355,90, EXT  
 Signal has been modified after loading from rawdata file!

| Peak # | RetTime [min] | Type | Width [min] | Area [mAU*s] | Height [mAU] | Area %  |
|--------|---------------|------|-------------|--------------|--------------|---------|
| 1      | 8.531         | MF   | 0.3179      | 1.26262e4    | 661.92004    | 49.8663 |
| 2      | 9.895         | FM   | 0.4334      | 1.26939e4    | 488.19965    | 50.1337 |

Totals :                    2.53202e4 1150.11969

```

=====
Acq. Operator   : SYSTEM                      Seq. Line :    3
Acq. Instrument : 1260                        Location  :   84
Injection Date  : 5/13/2021 10:31:08 AM      Inj       :    1
                                           Inj Volume: 5.000 µl
Acq. Method     : E:\DATA\SC\SC-16-33\SC-16-33-RAC-0J-98 2021-05-13 09-47-05\SC-5-0JH-98-2-
                  DAD-1ML-20MIN.M
Last changed    : 5/13/2021 9:47:05 AM by SYSTEM
Analysis Method : E:\DATA\SC\SC-16-33\SC-16-33-RAC-0J-98 2021-05-13 09-47-05\SC-5-0JH-98-2-
                  DAD-1ML-20MIN.M (Sequence Method)
Last changed    : 5/13/2021 11:01:04 AM by SYSTEM
                  (modified after loading)
Additional Info : Peak(s) manually integrated
  
```

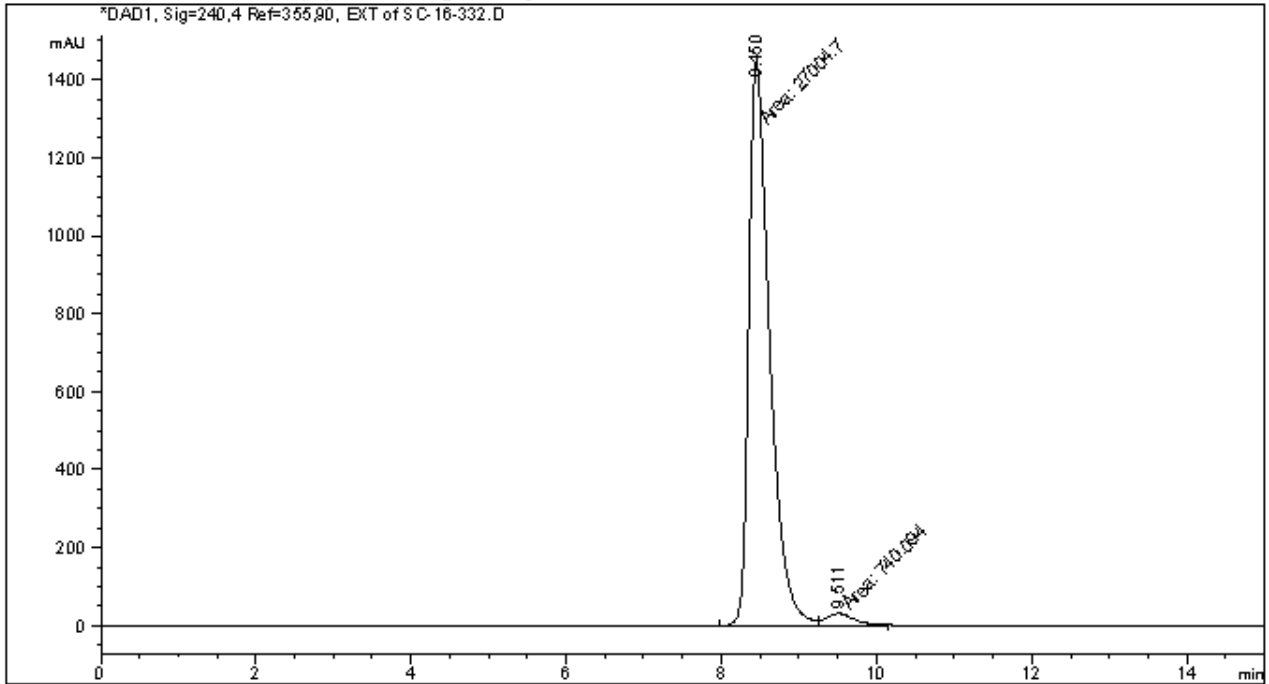

=====  
 Area Percent Report  
 =====

```

Sorted By      :      Signal
Multiplier     :      1.0000
Dilution       :      1.0000
Do not use Multiplier & Dilution Factor with ISTDs
  
```

Signal 1: DAD1, Sig=240,4 Ref=355,90, EXT  
 Signal has been modified after loading from rawdata file!

| Peak # | RetTime [min] | Type | Width [min] | Area [mAU*s] | Height [mAU] | Area %  |
|--------|---------------|------|-------------|--------------|--------------|---------|
| 1      | 8.450         | MF   | 0.3116      | 2.70047e4    | 1444.33252   | 97.3325 |
| 2      | 9.511         | FM   | 0.4116      | 740.09369    | 29.96502     | 2.6675  |

Totals :                      2.77447e4  1474.29754

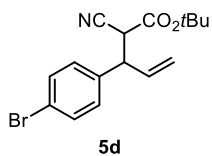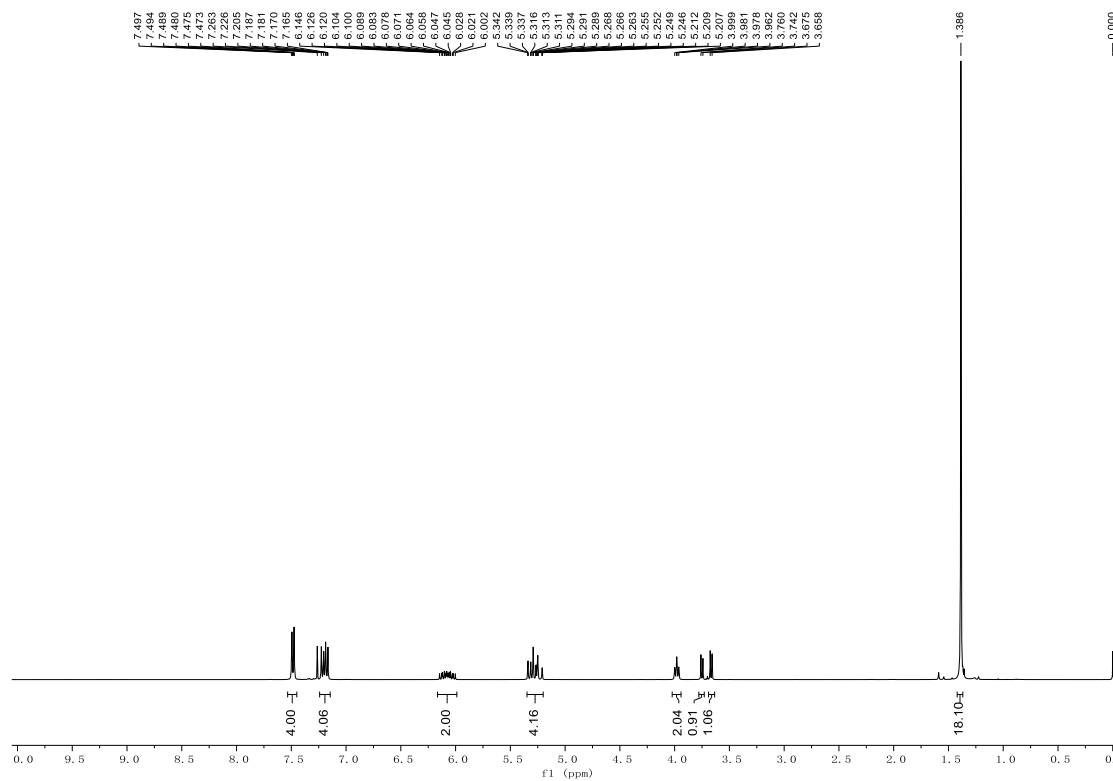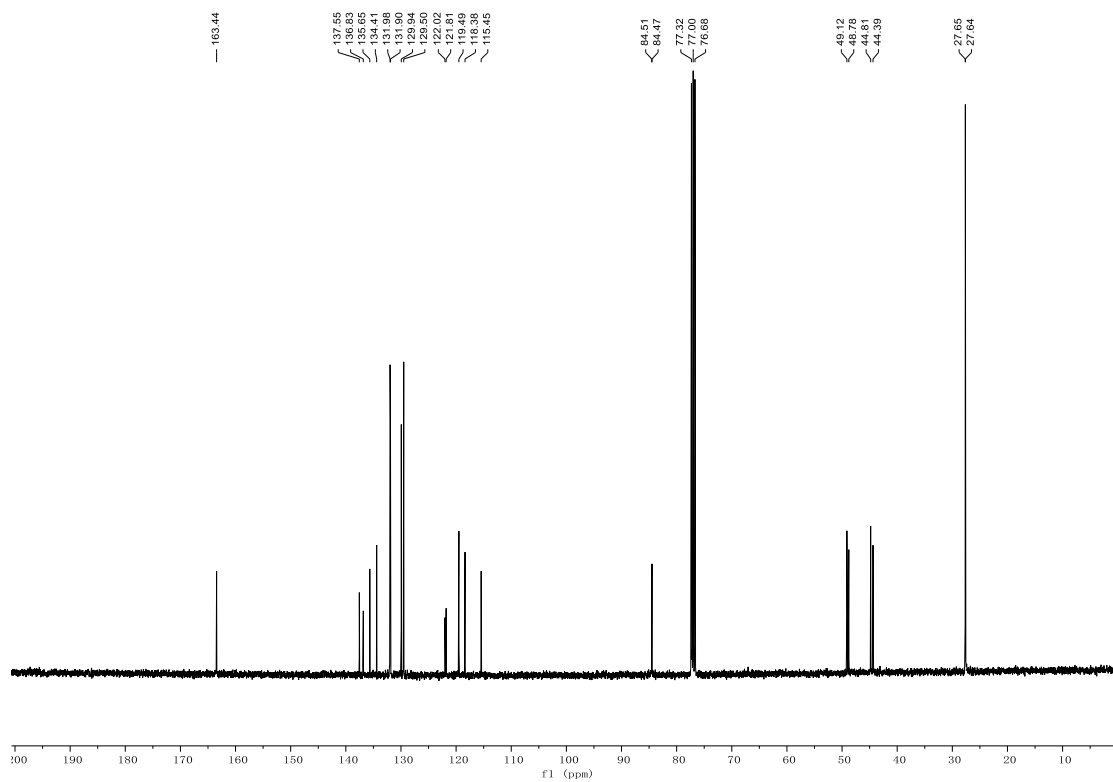



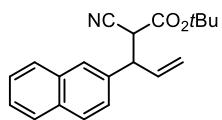

5o

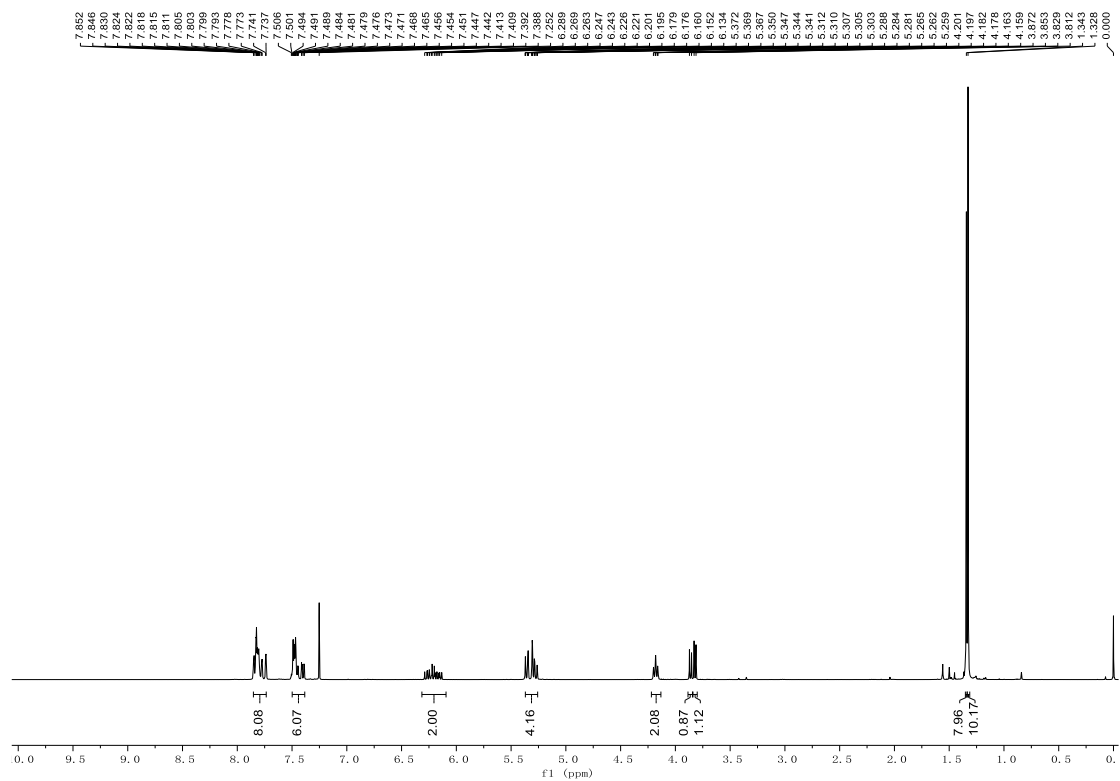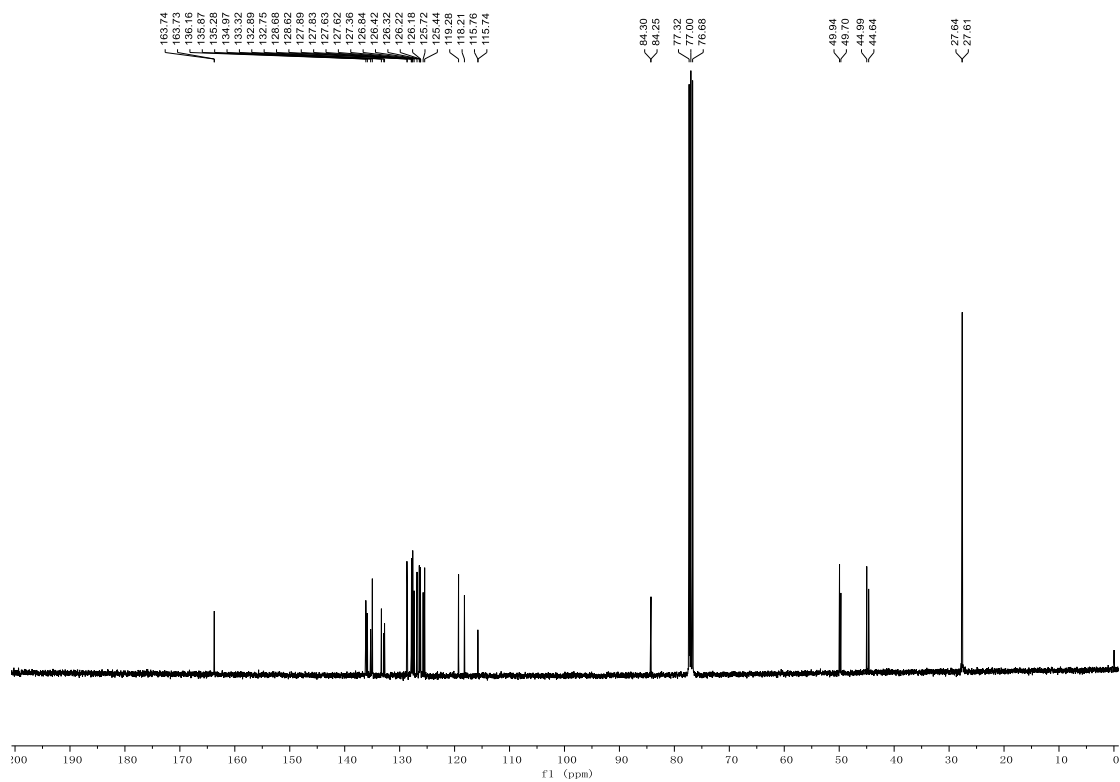



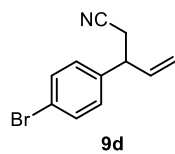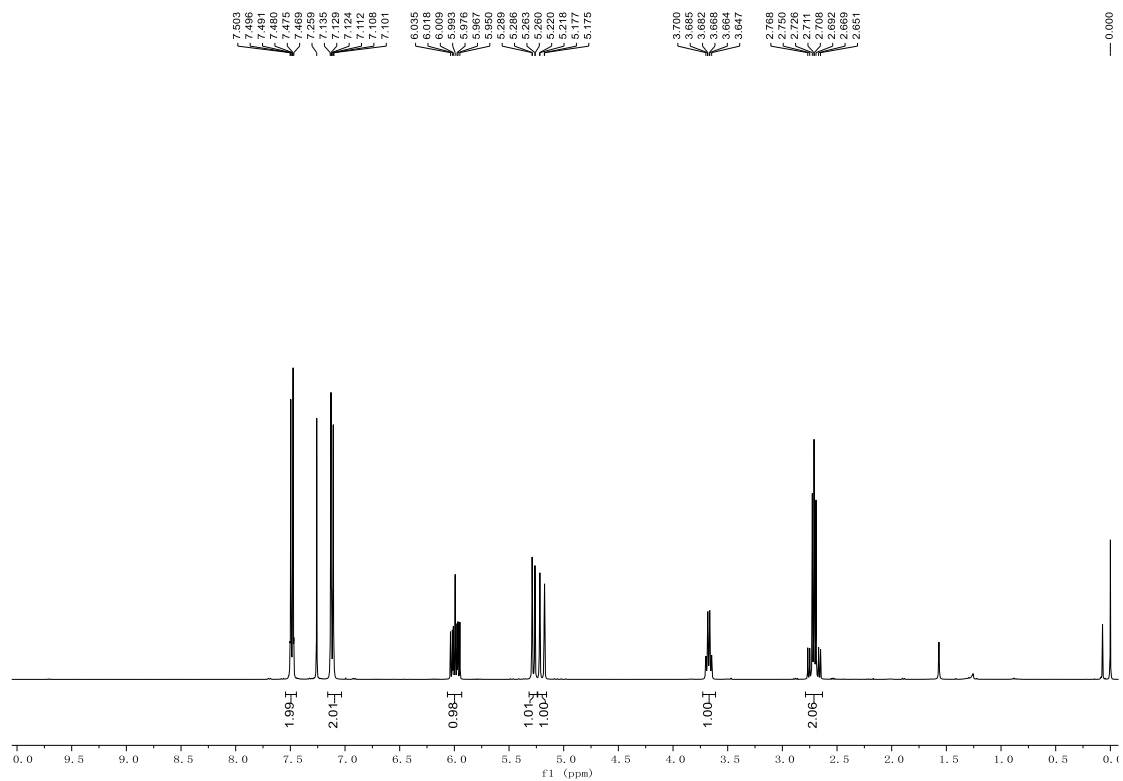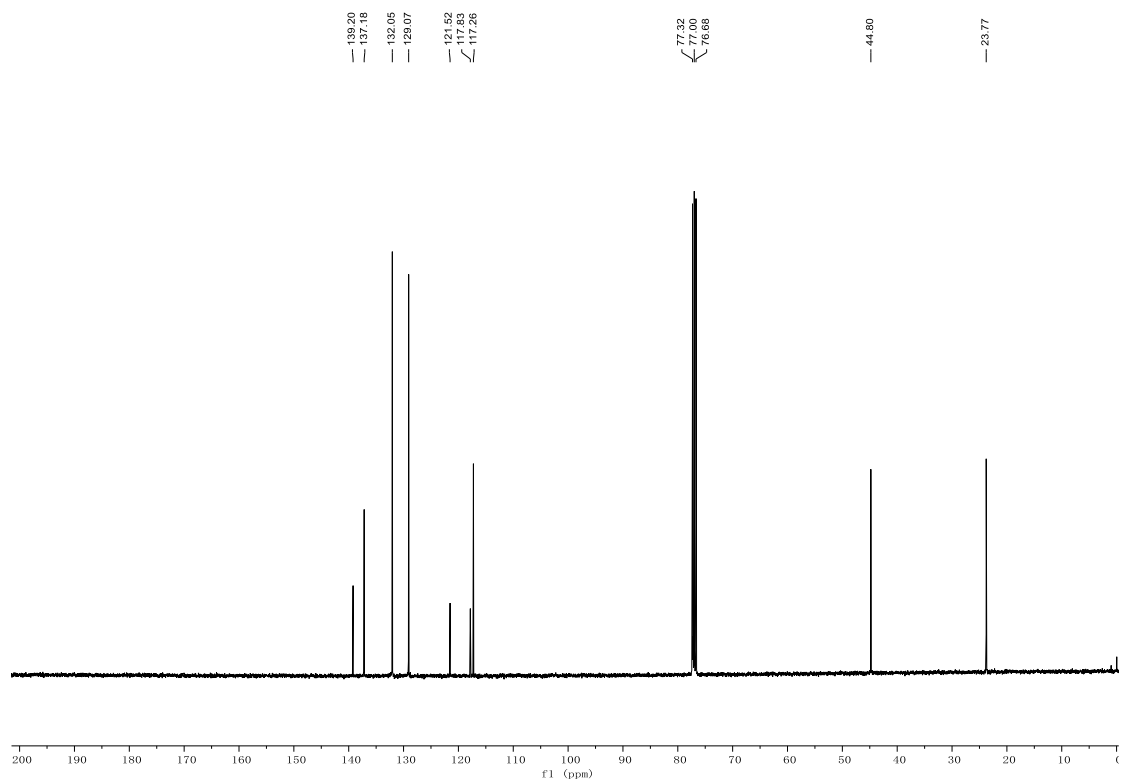

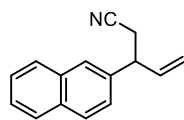

9a

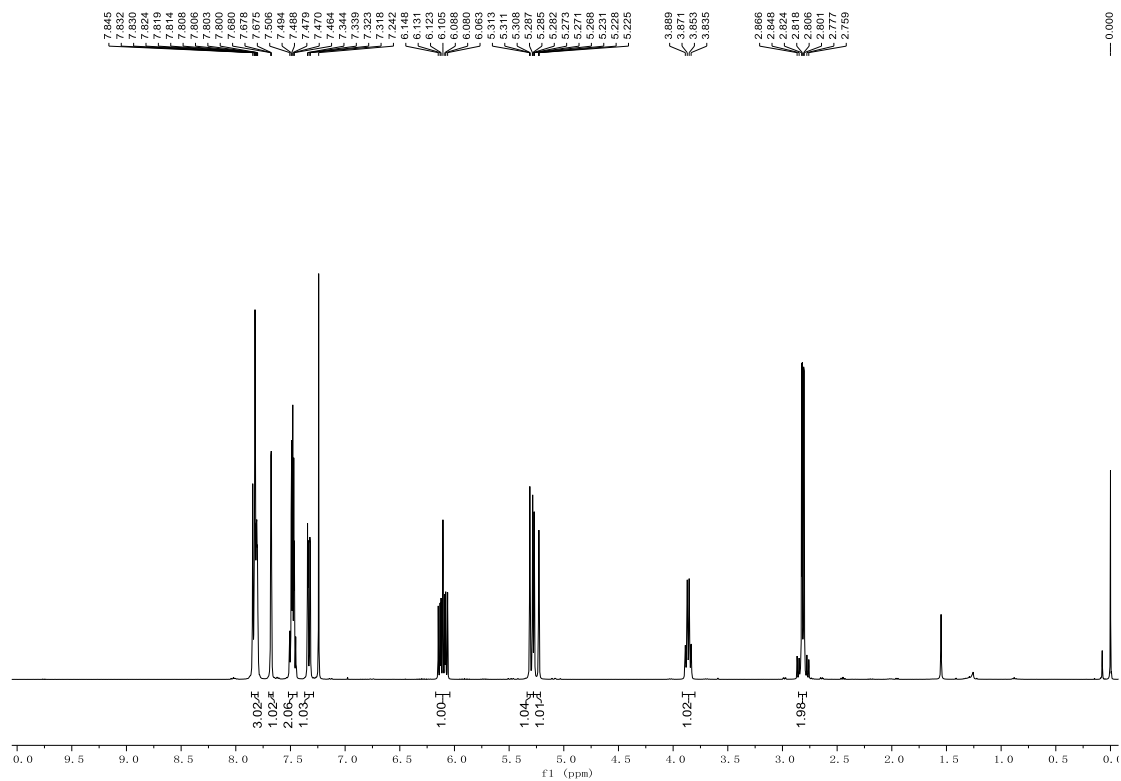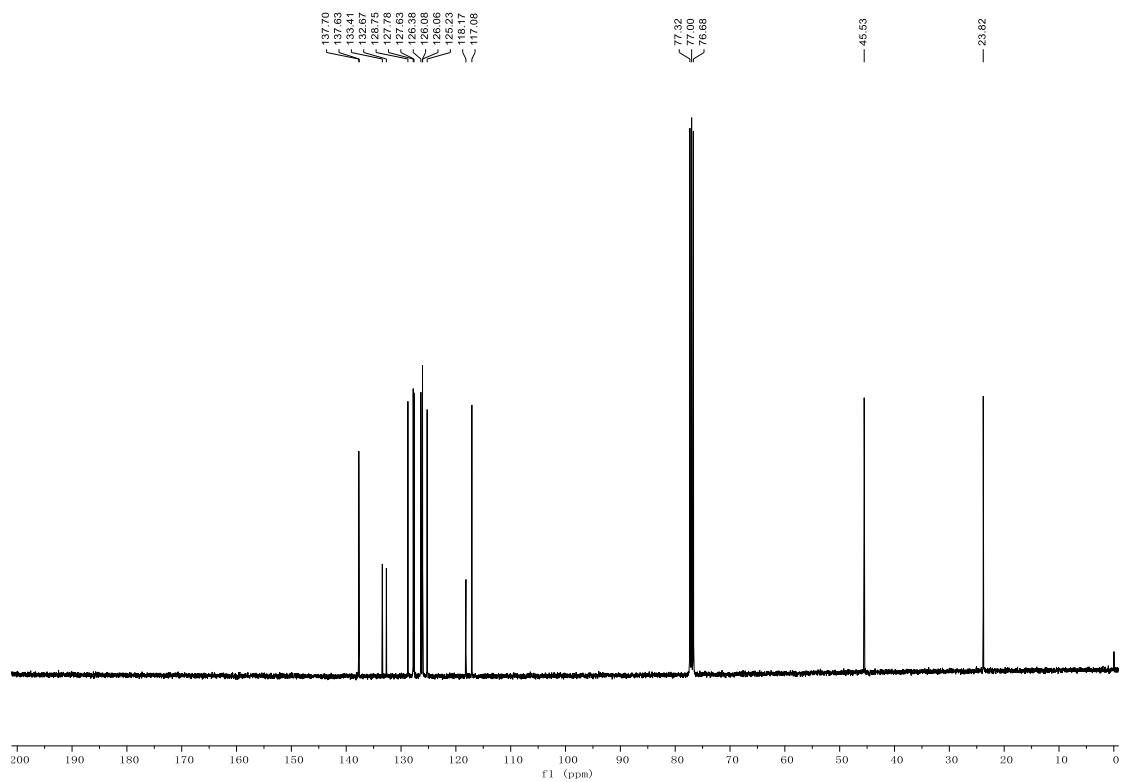

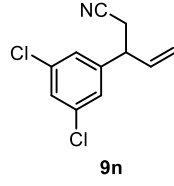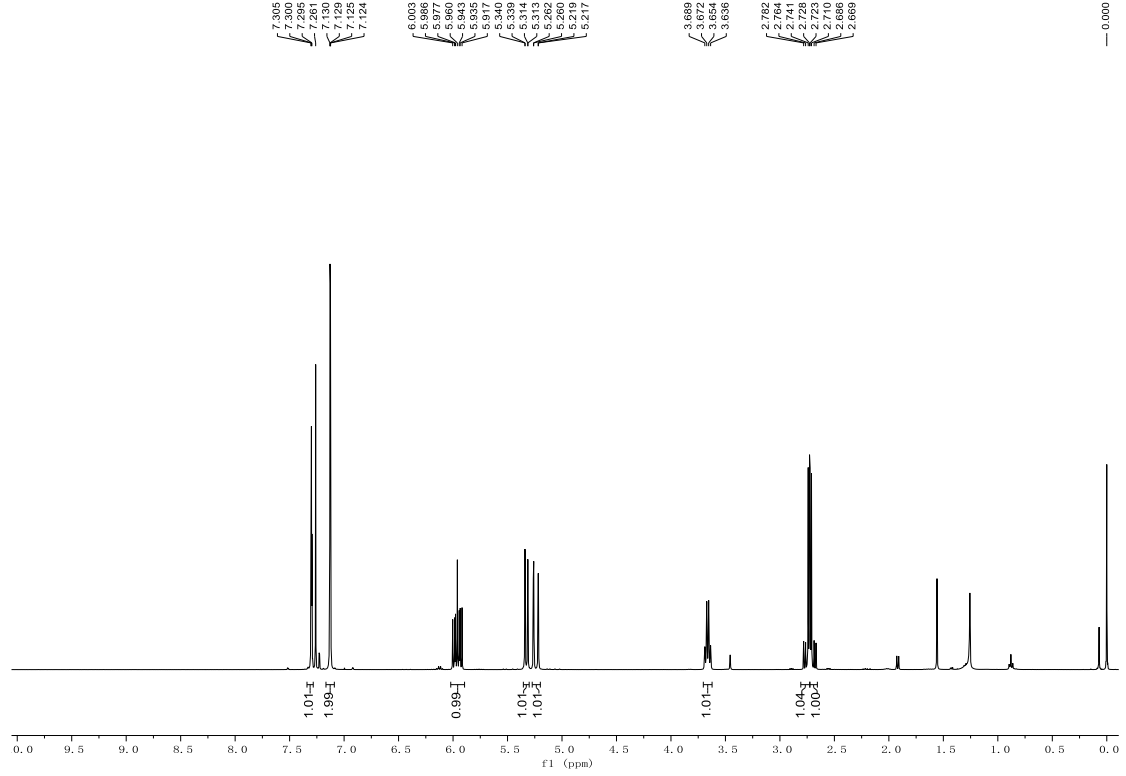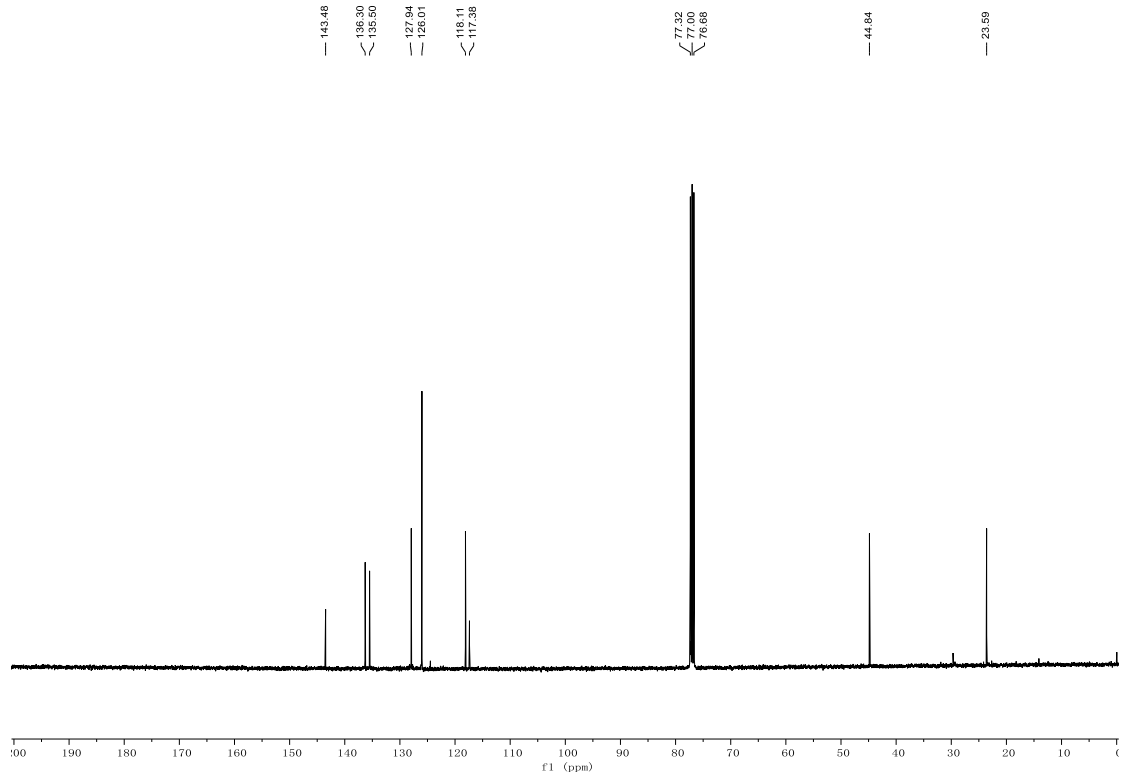

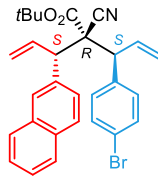

(*S,R,S*)-8A

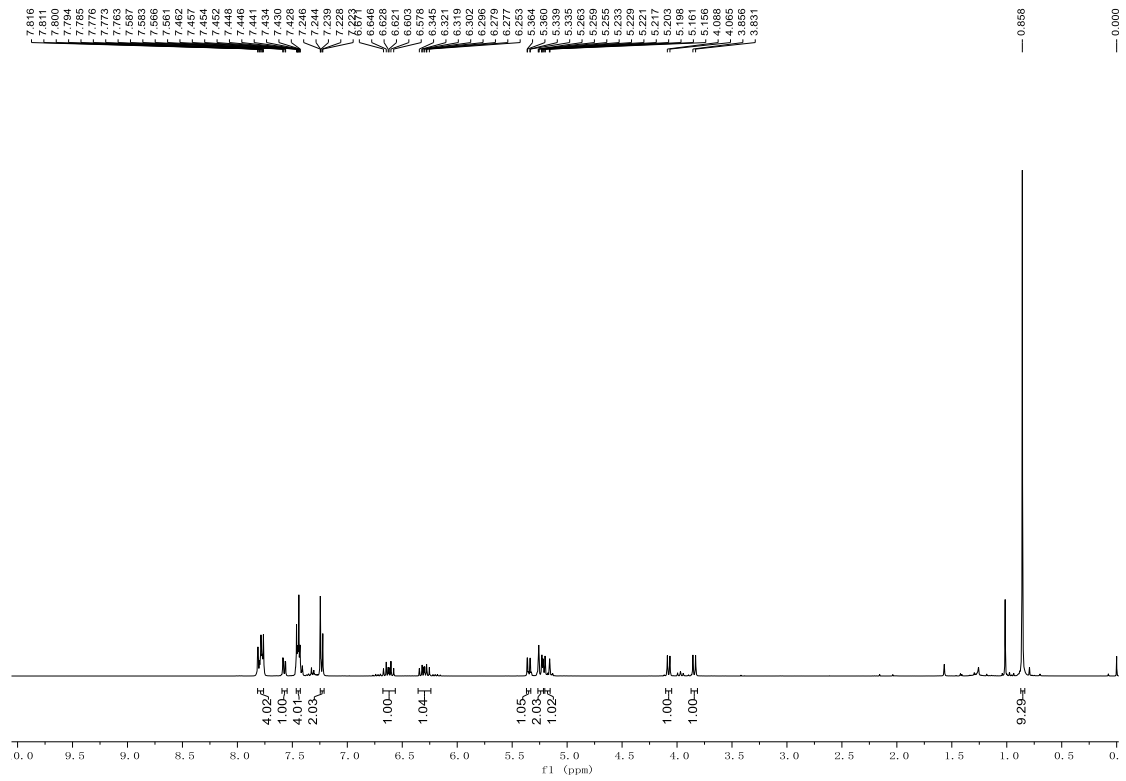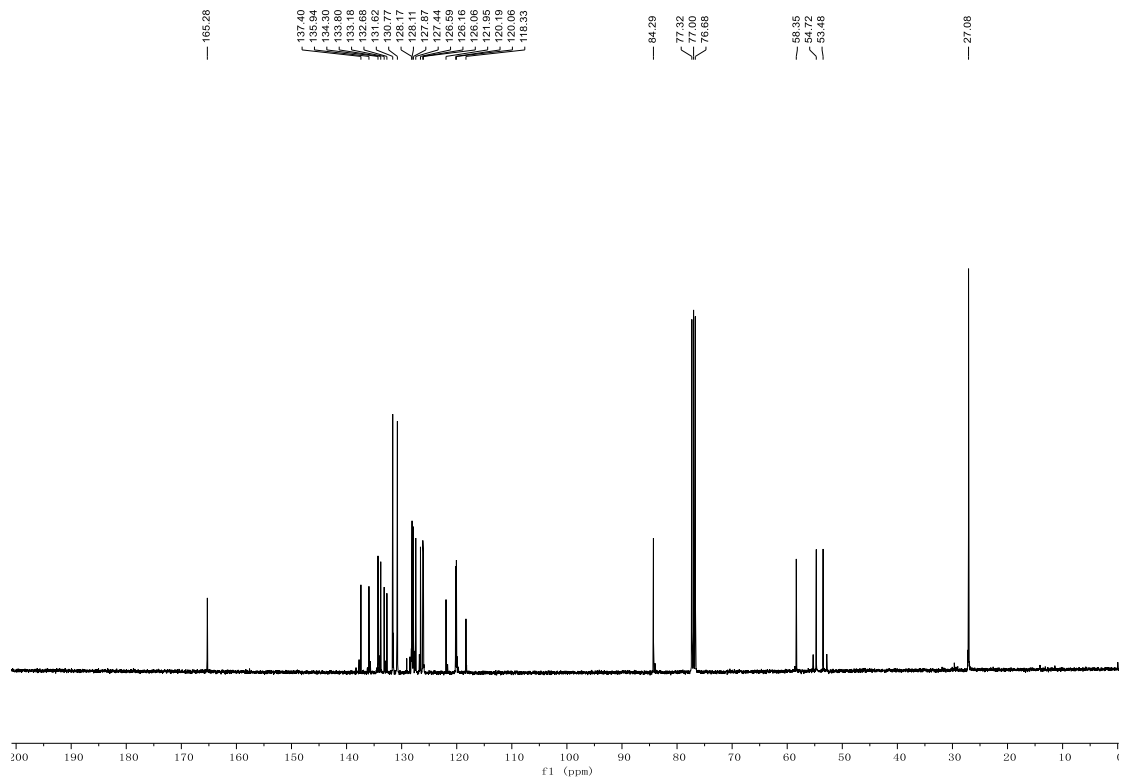

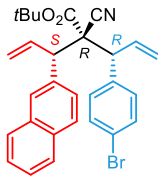

(*S,R,R*)-8A

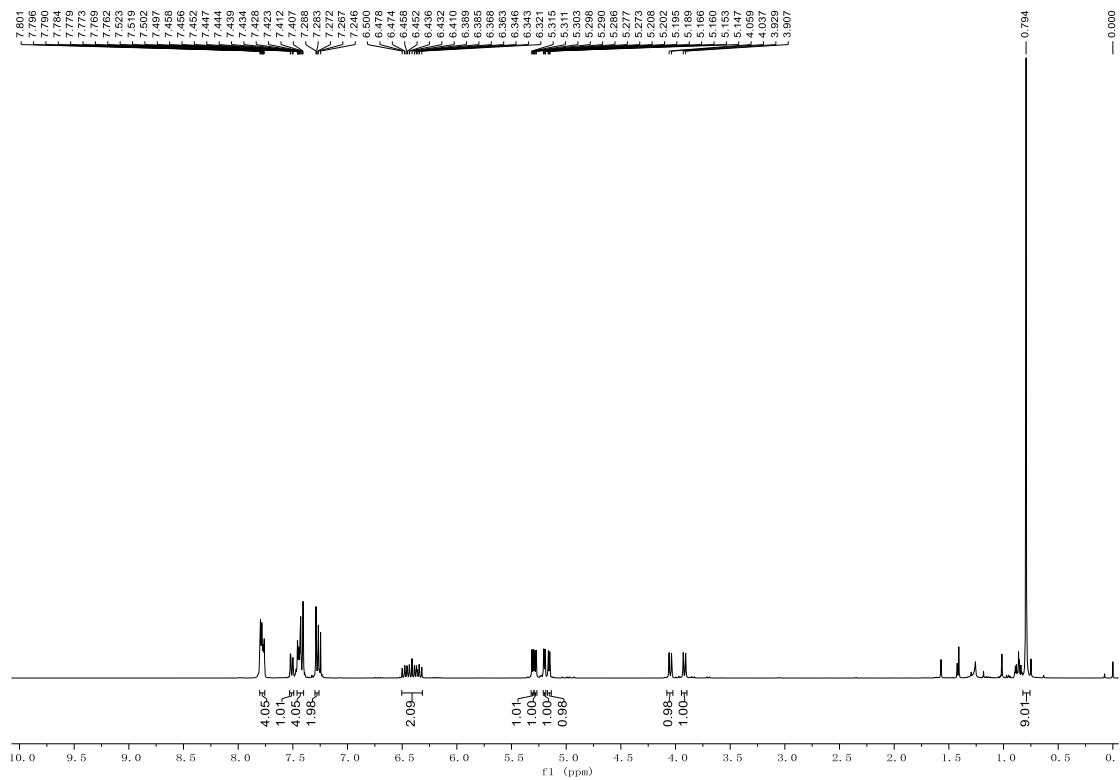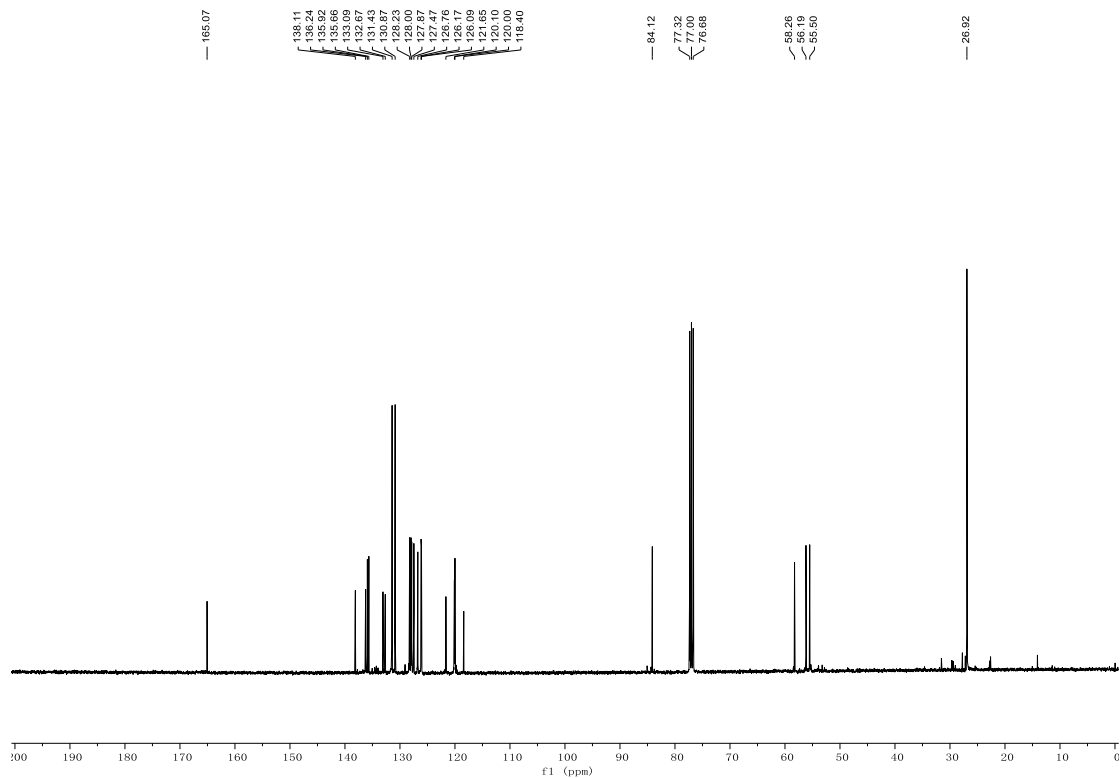

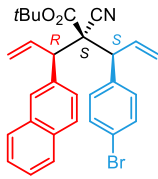

(*R,S,S*)-8A

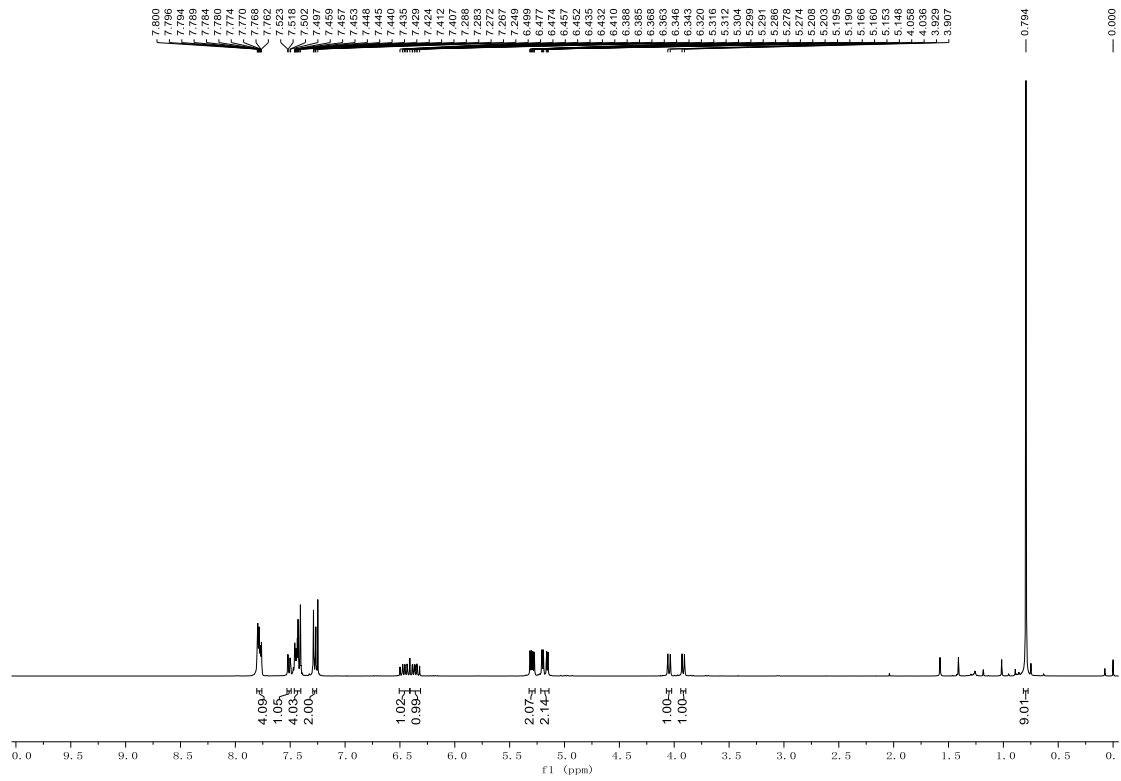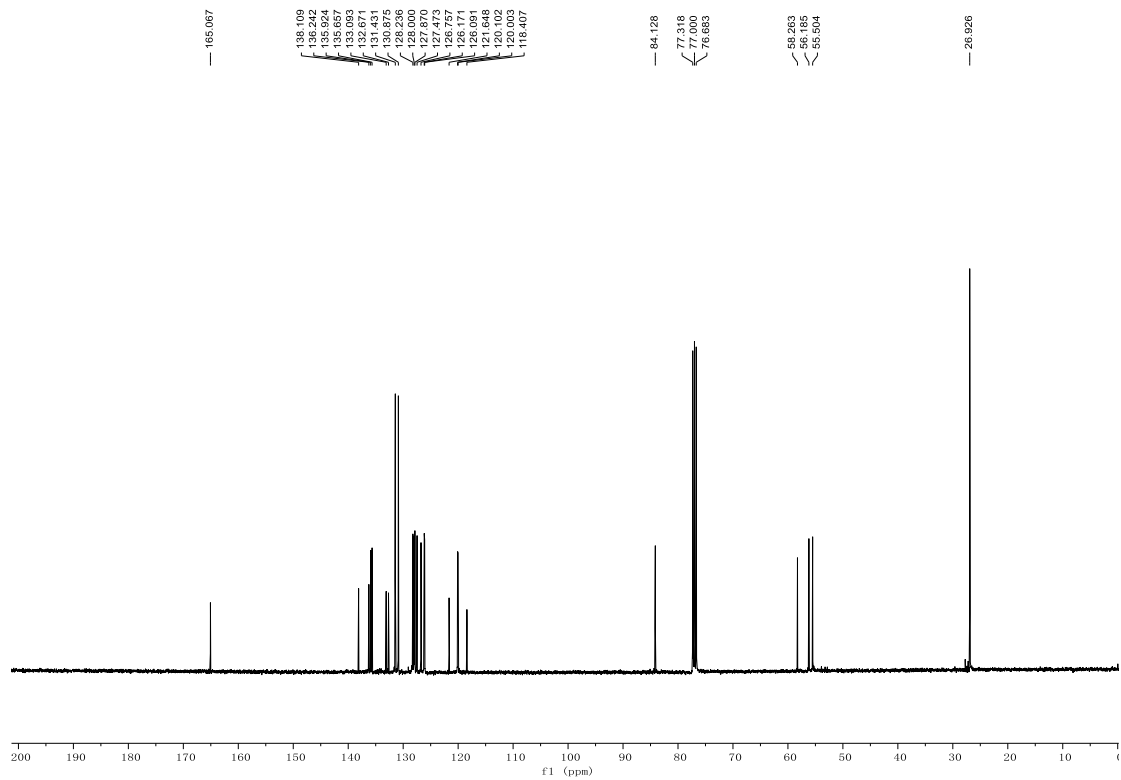



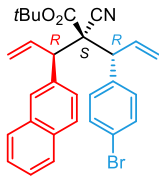

(*R,S,R*)-8A

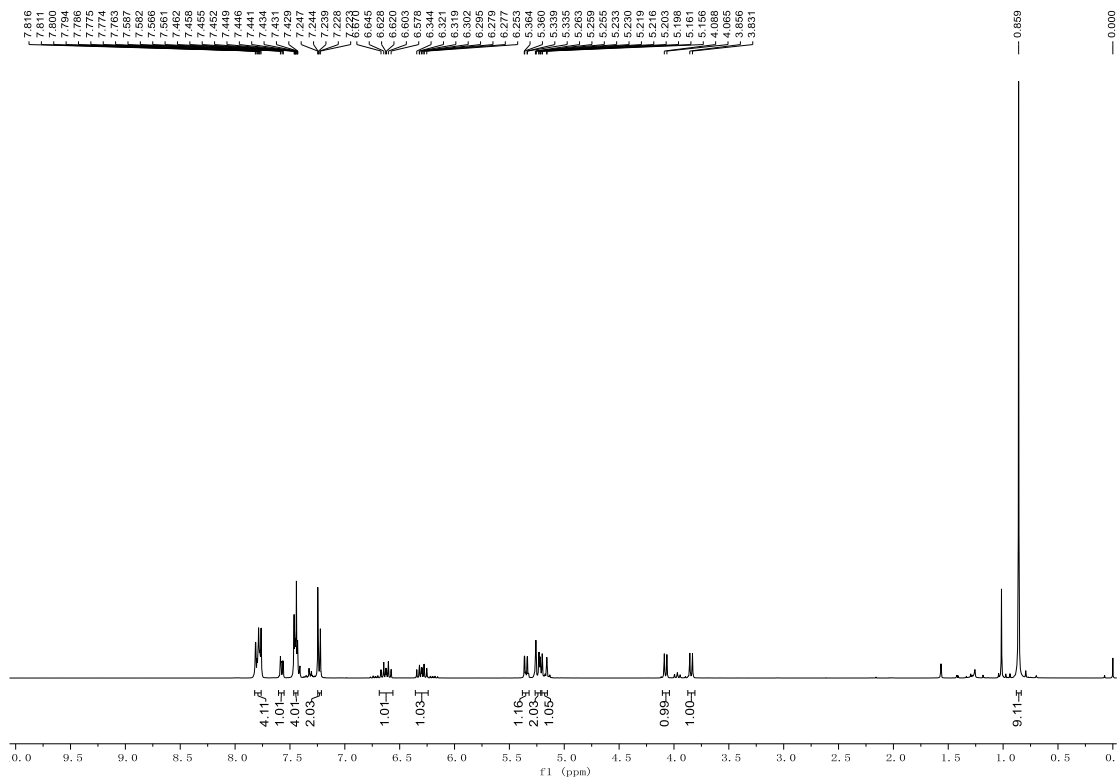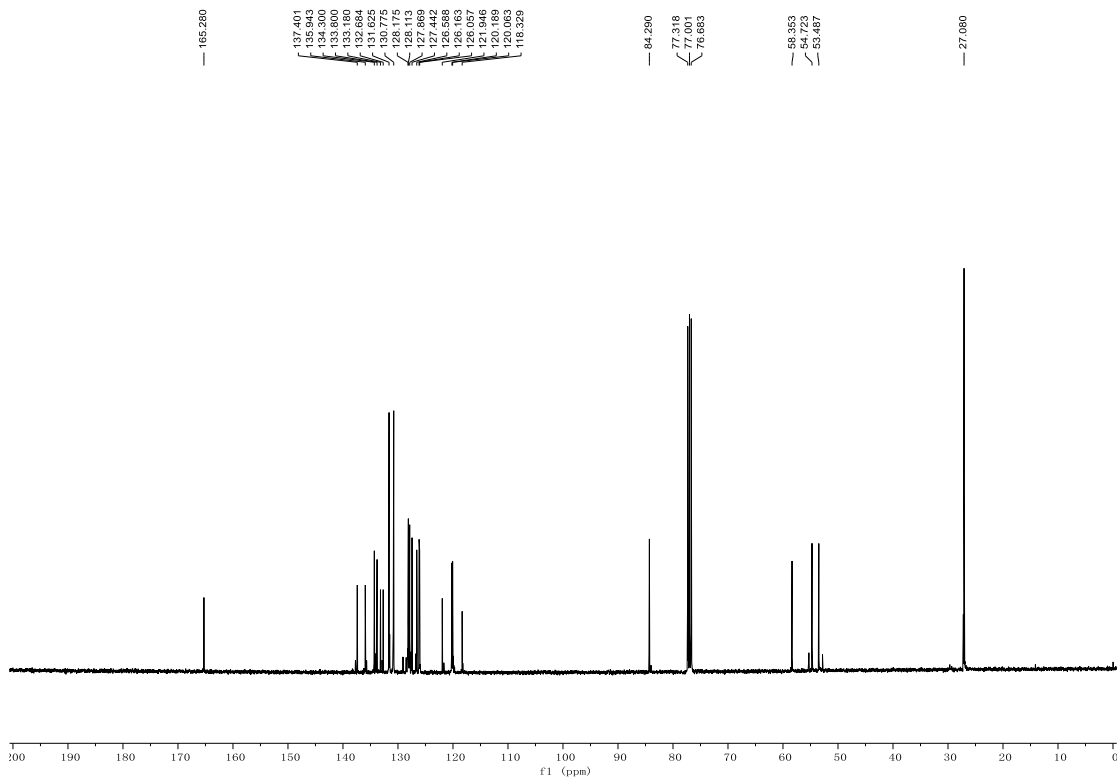

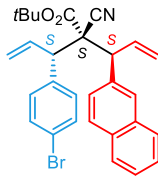

(*S,S*)-8A

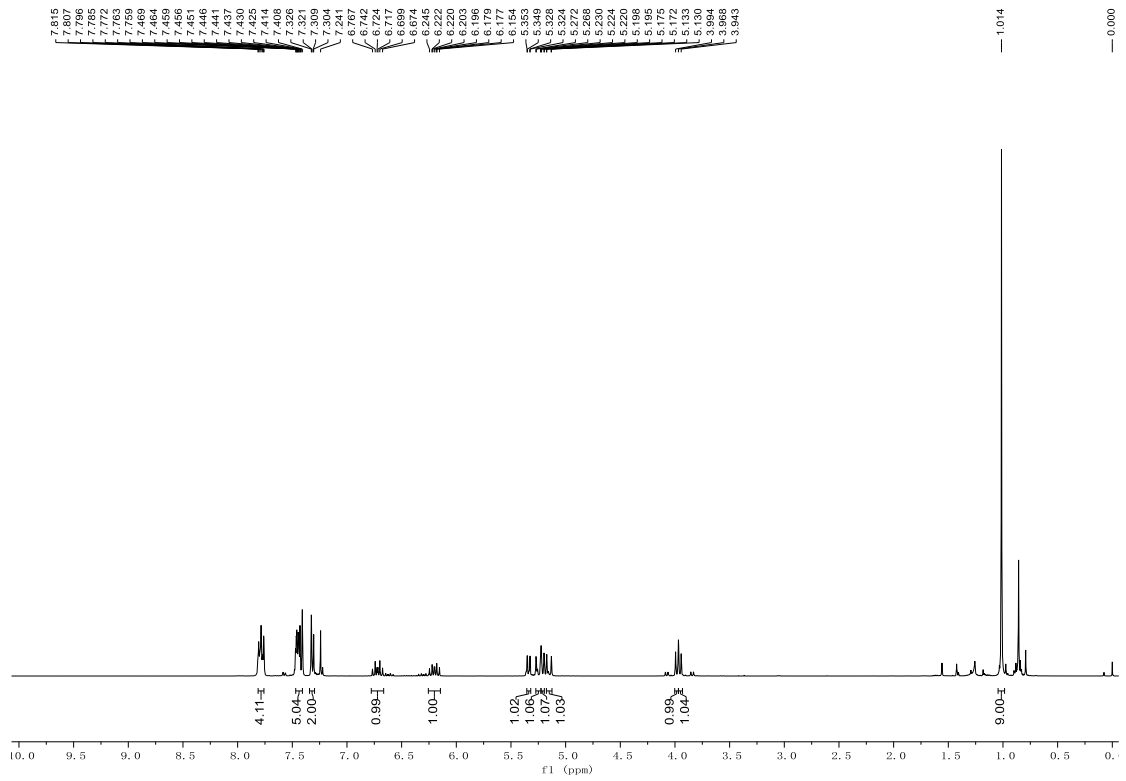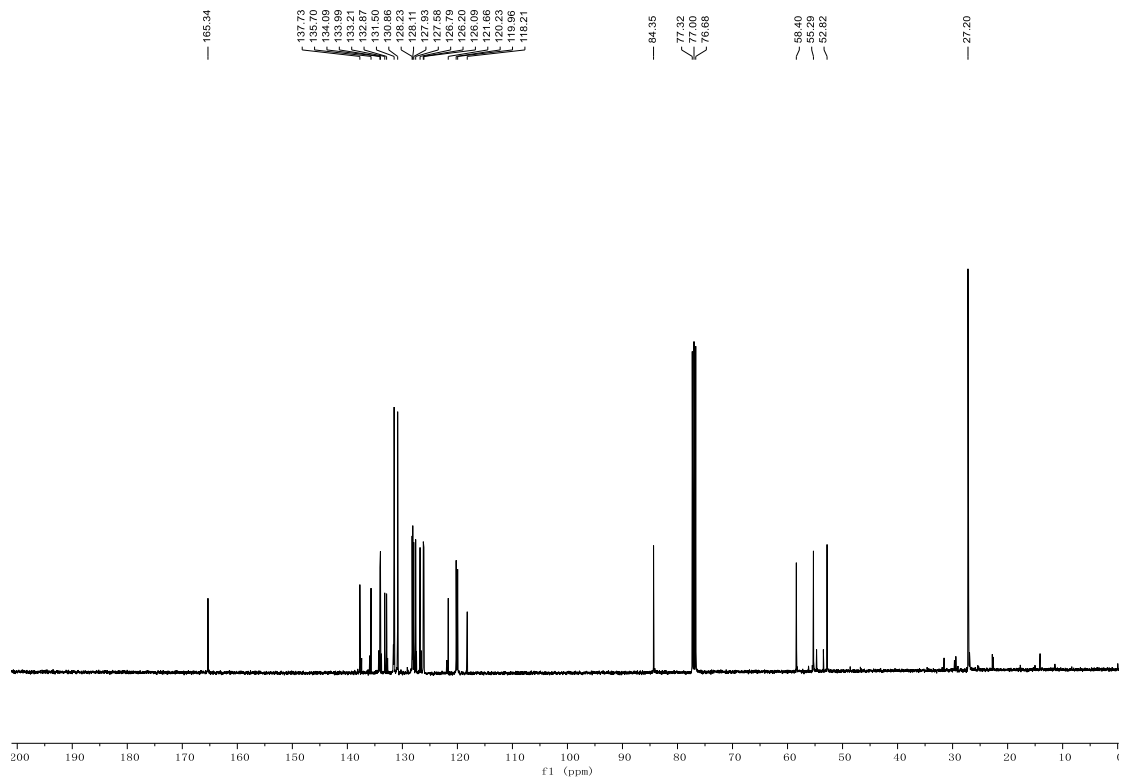

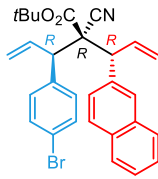

(*R,R*)-8A

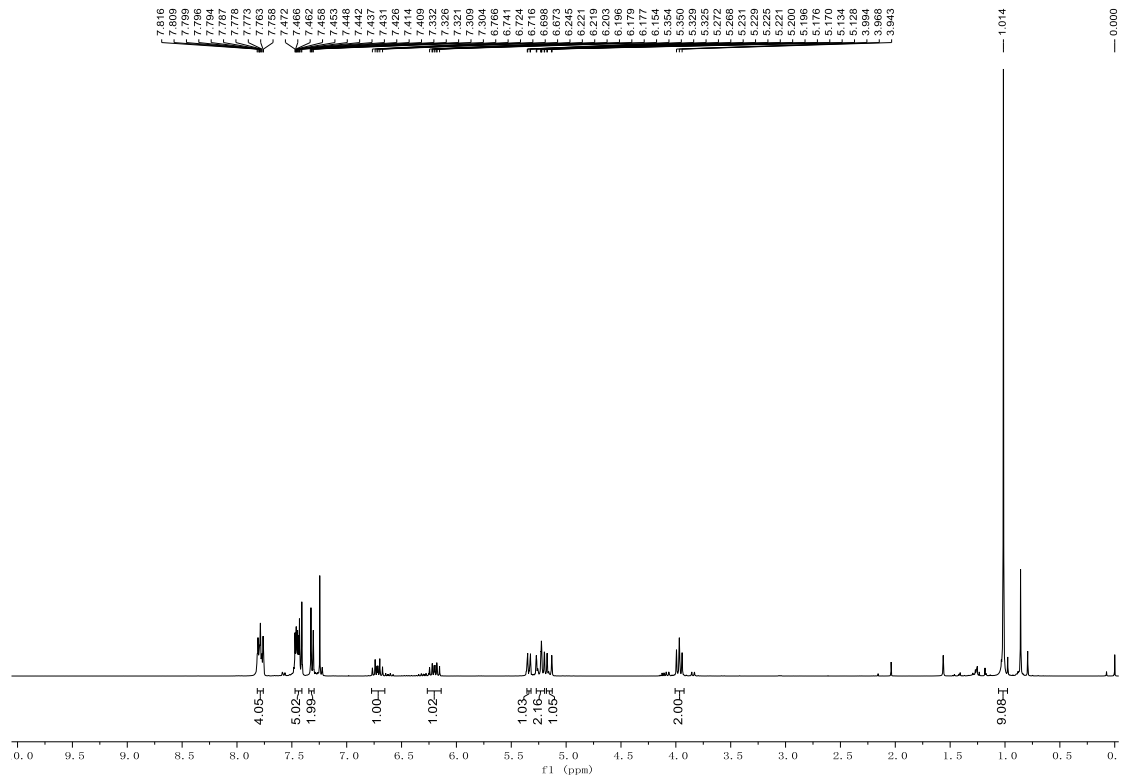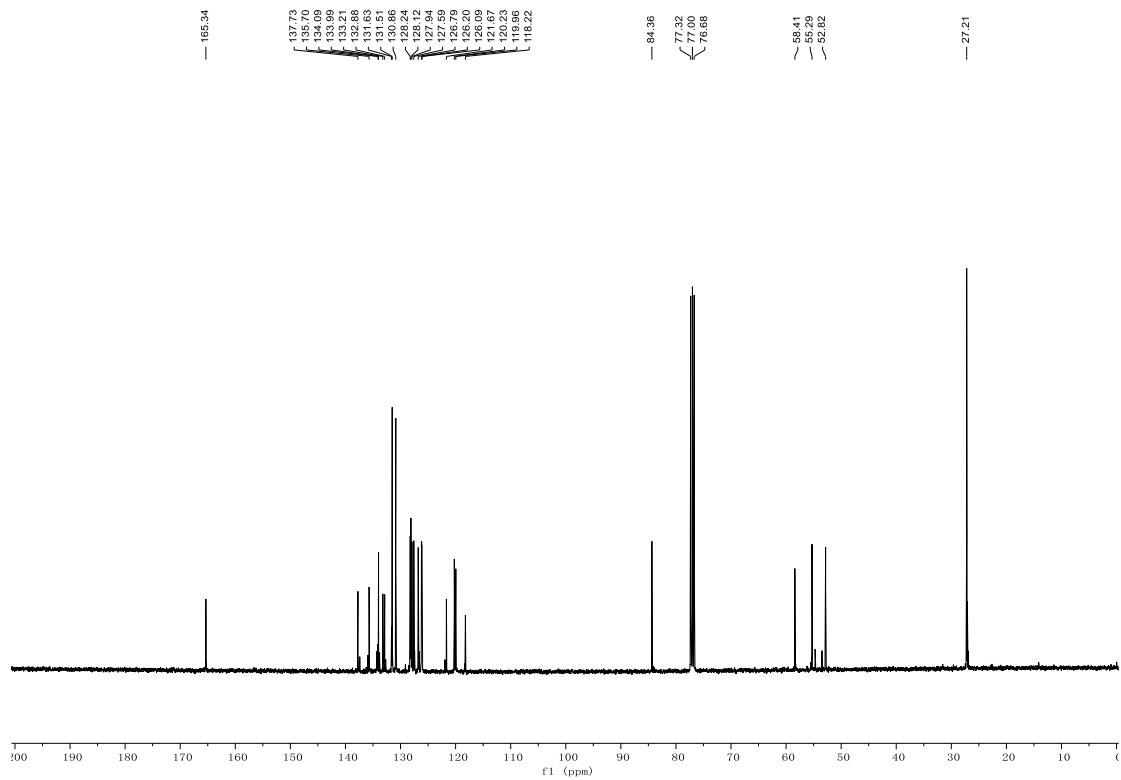

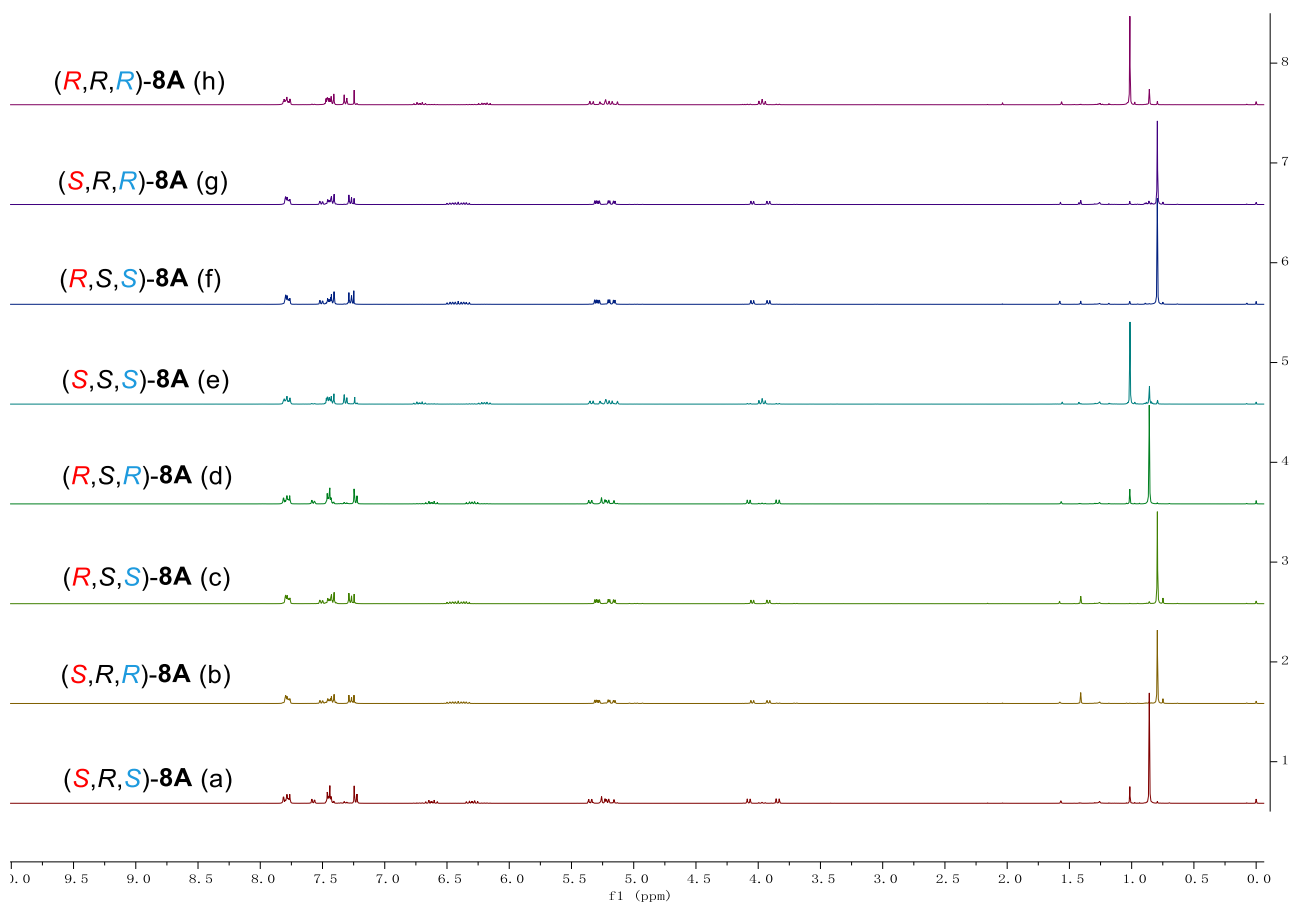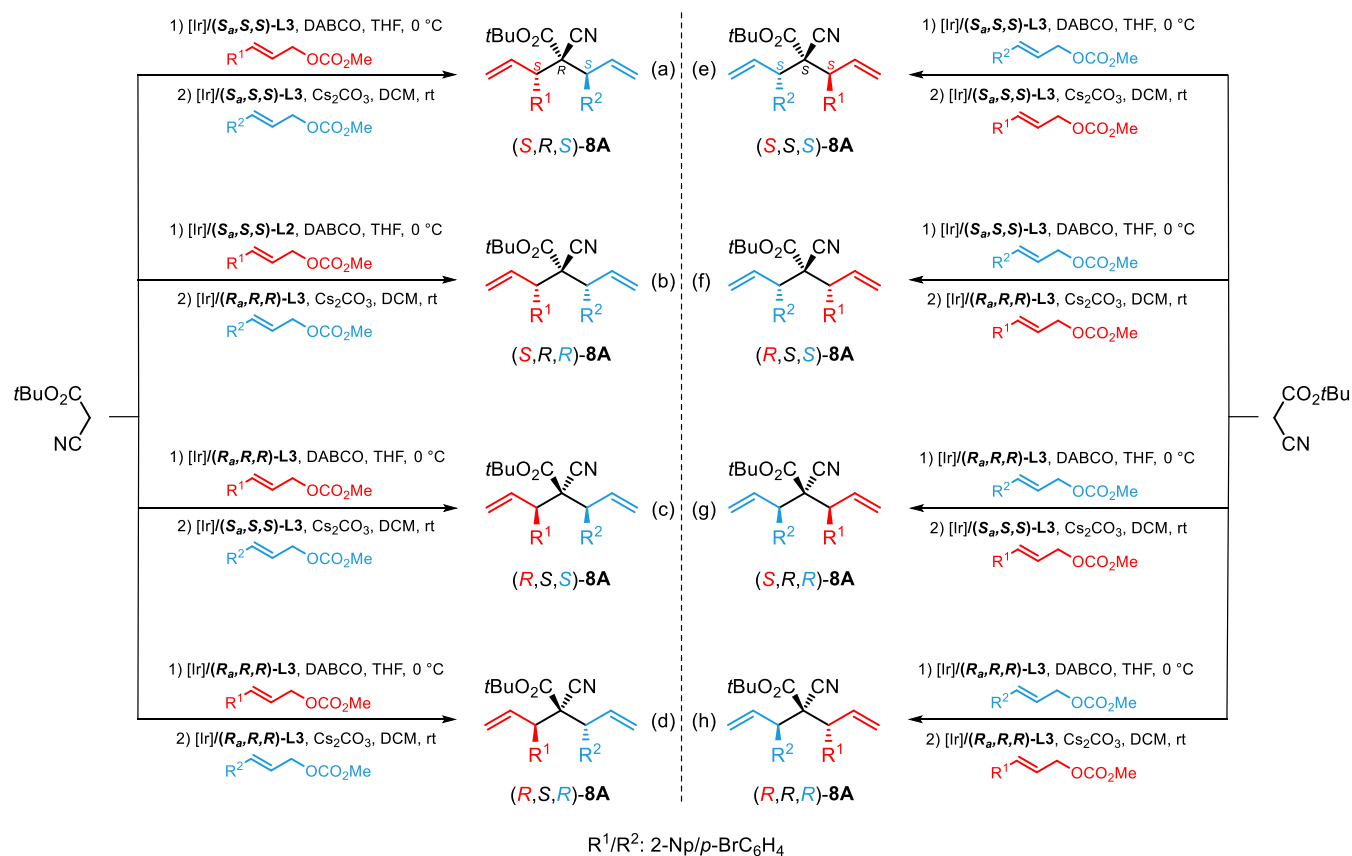

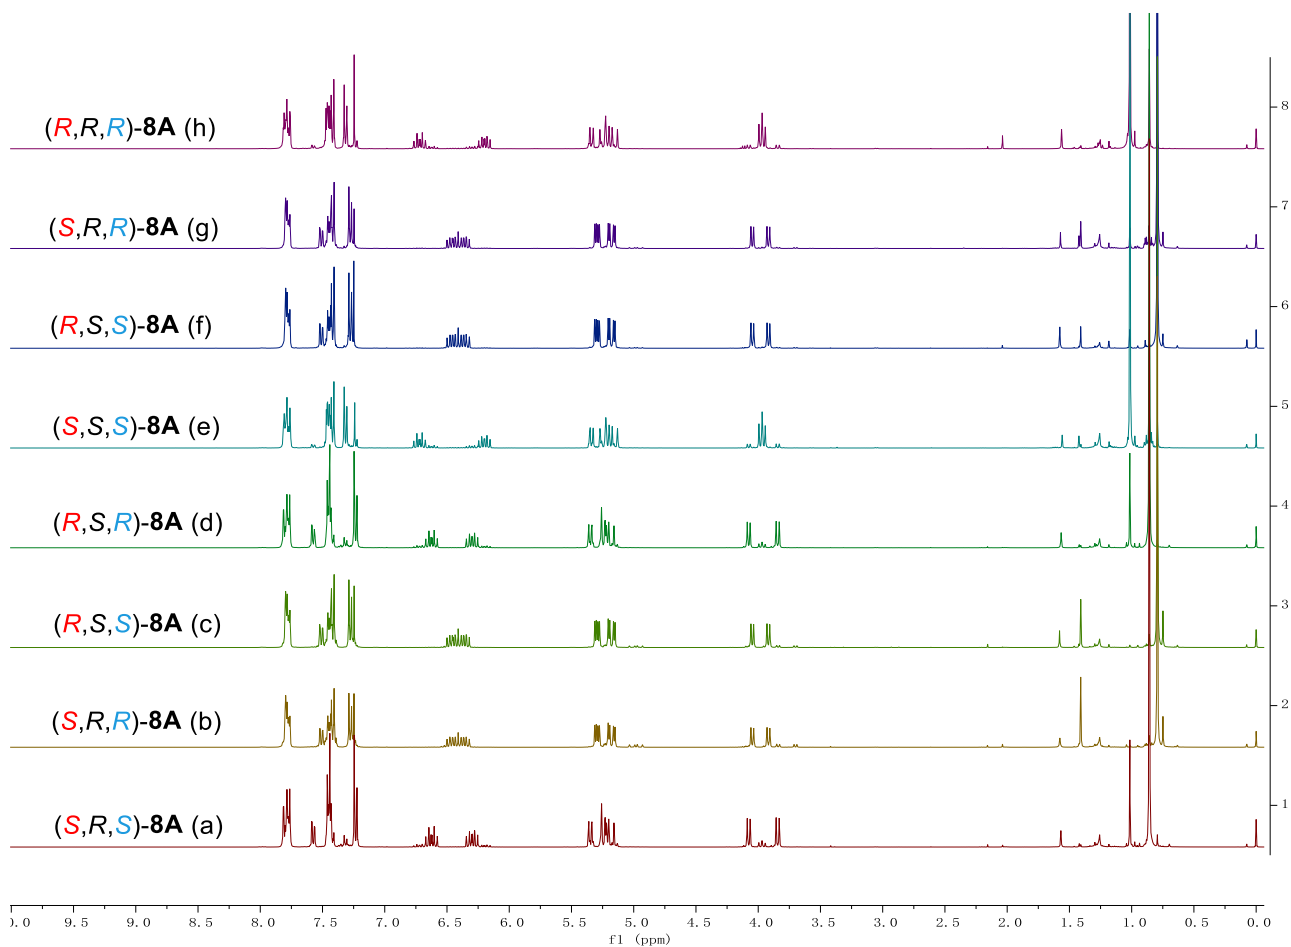

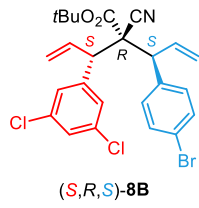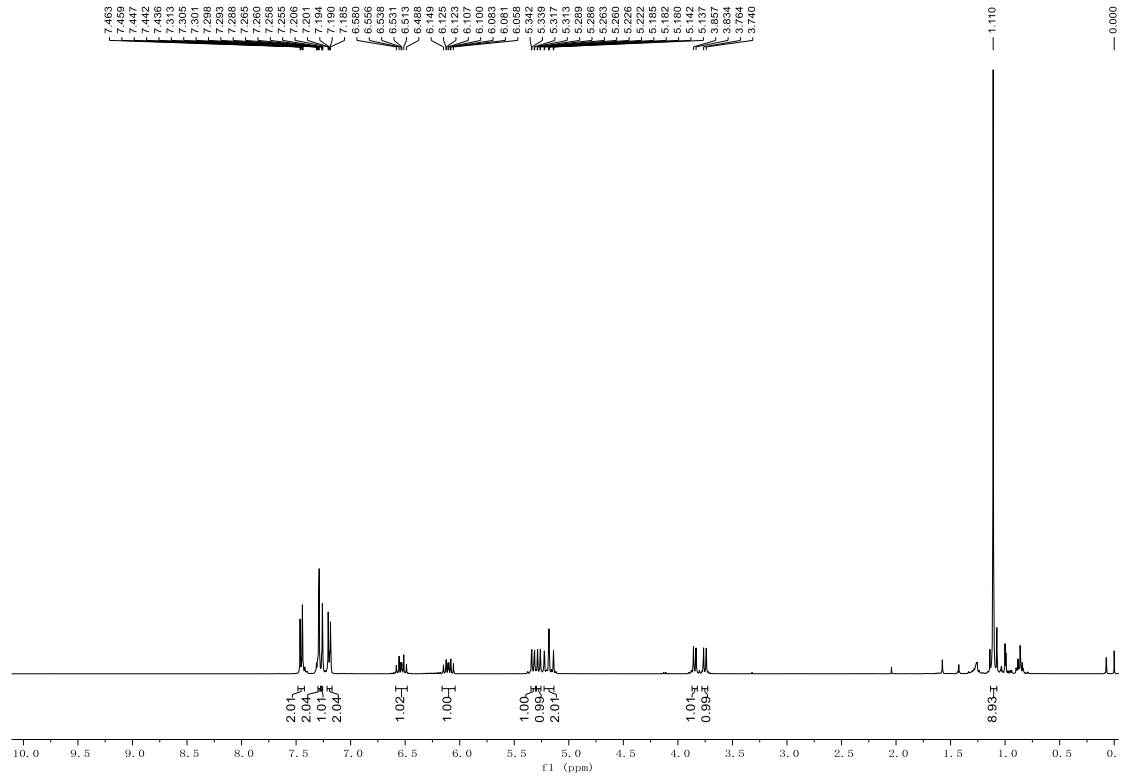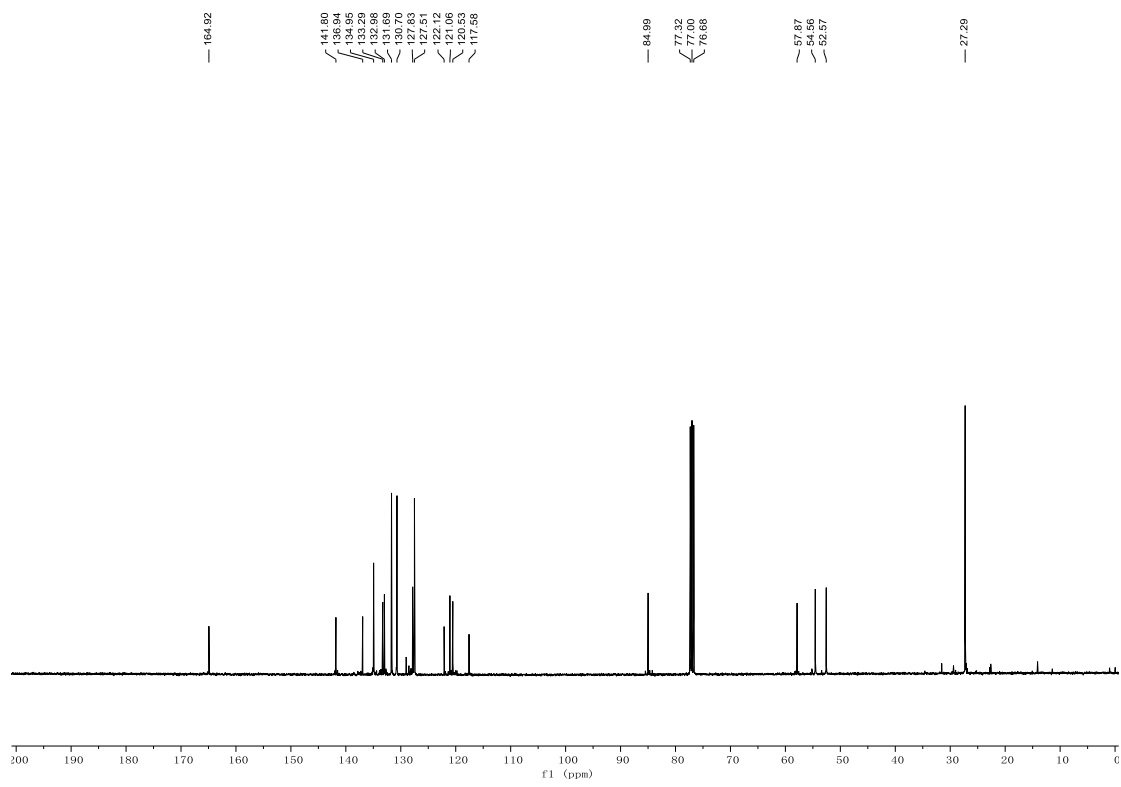

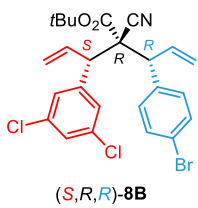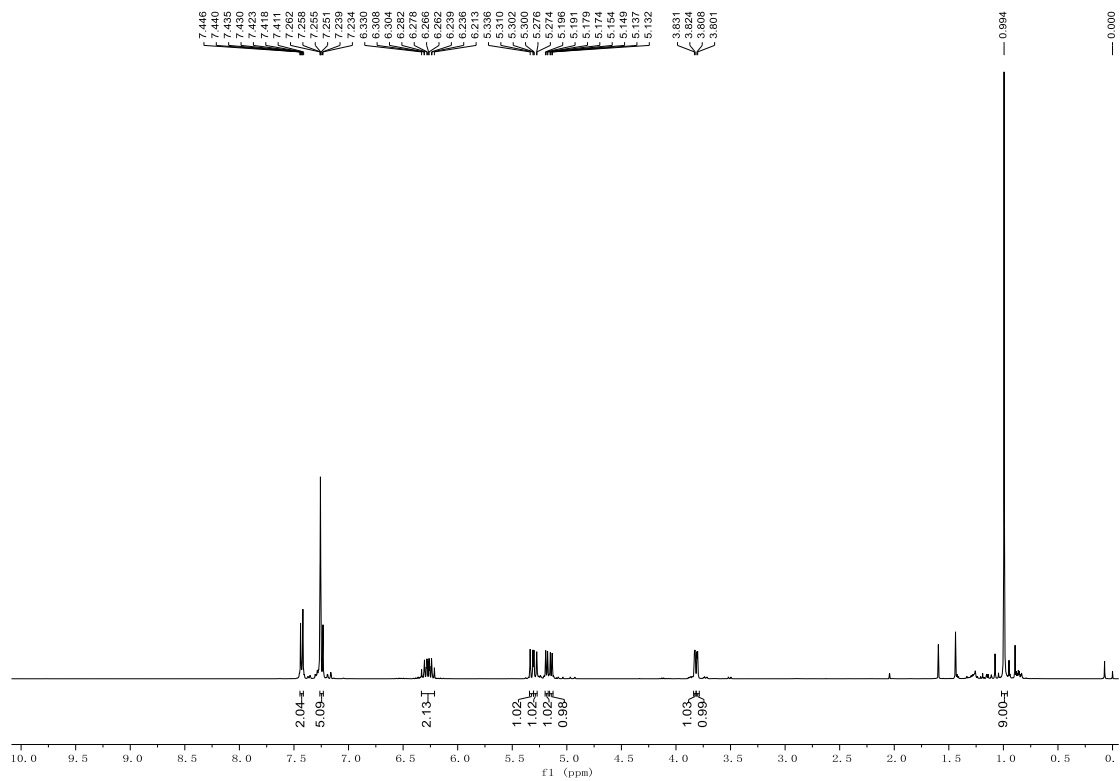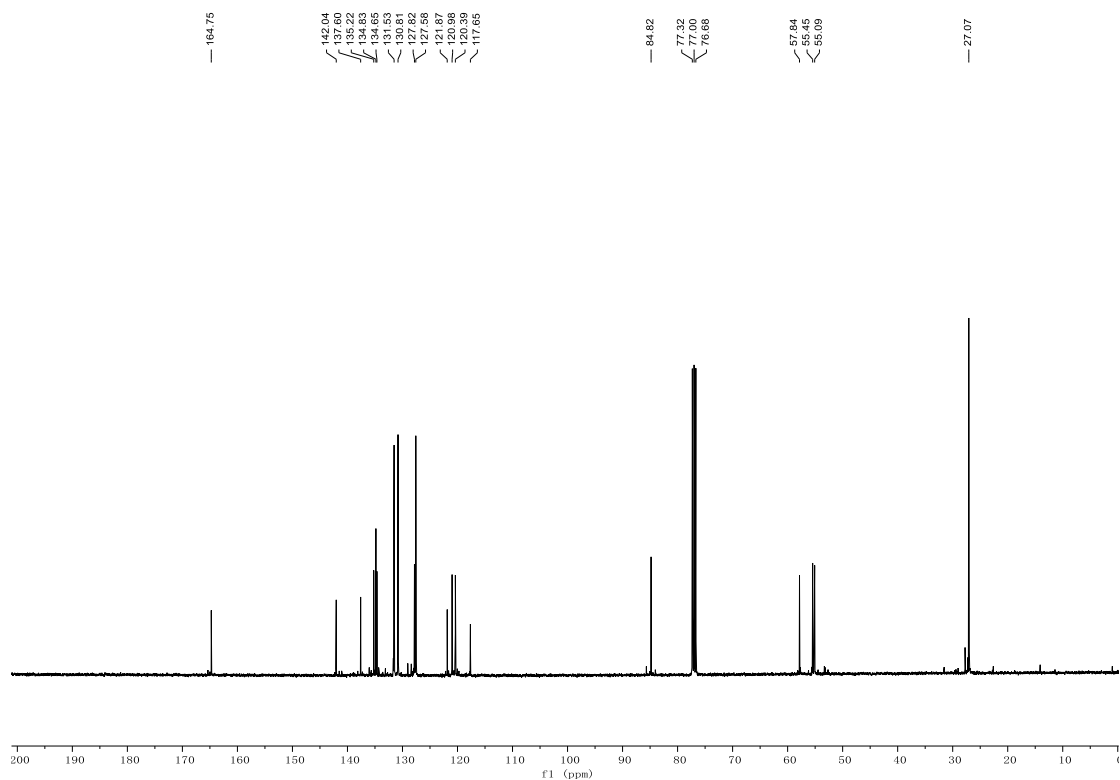

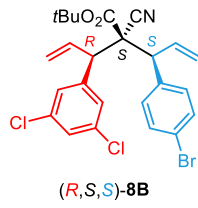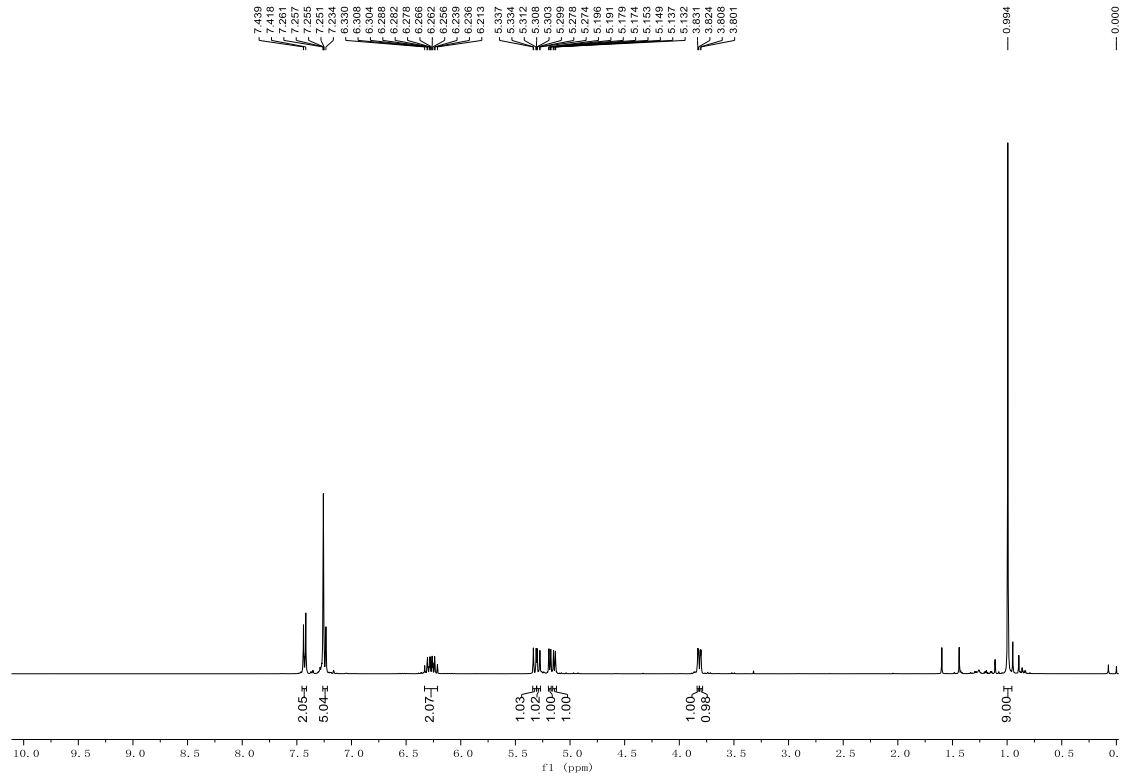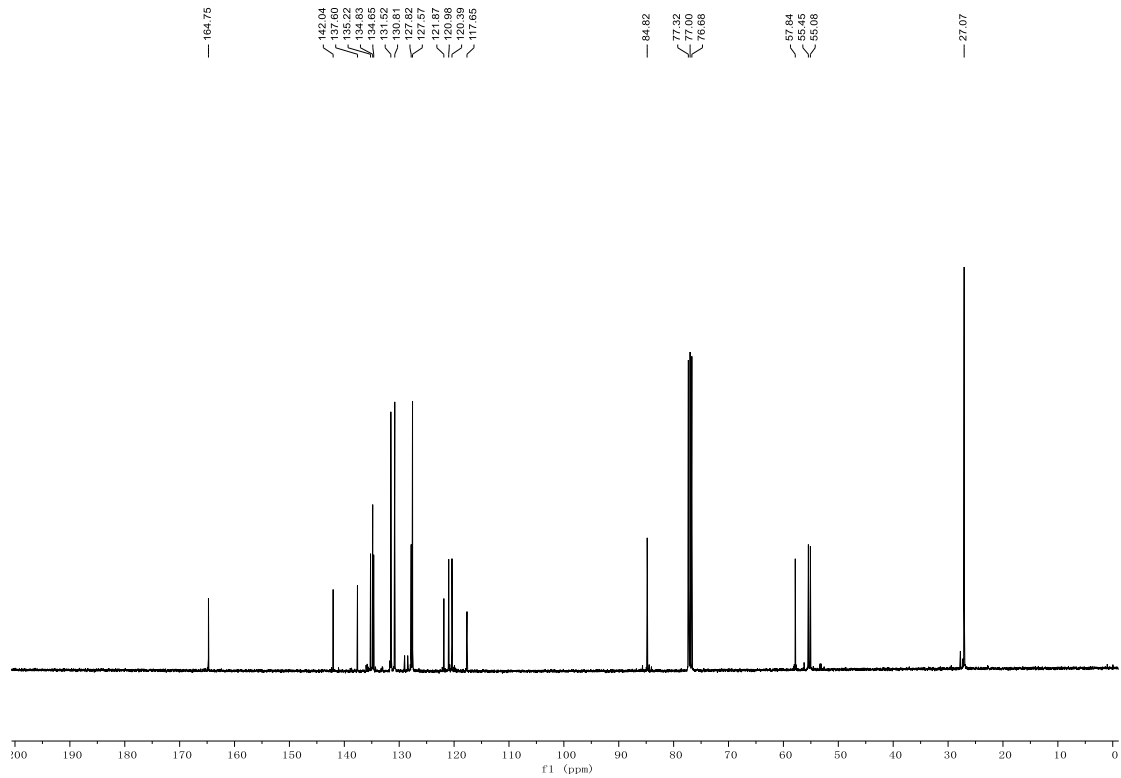



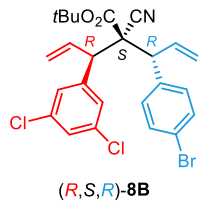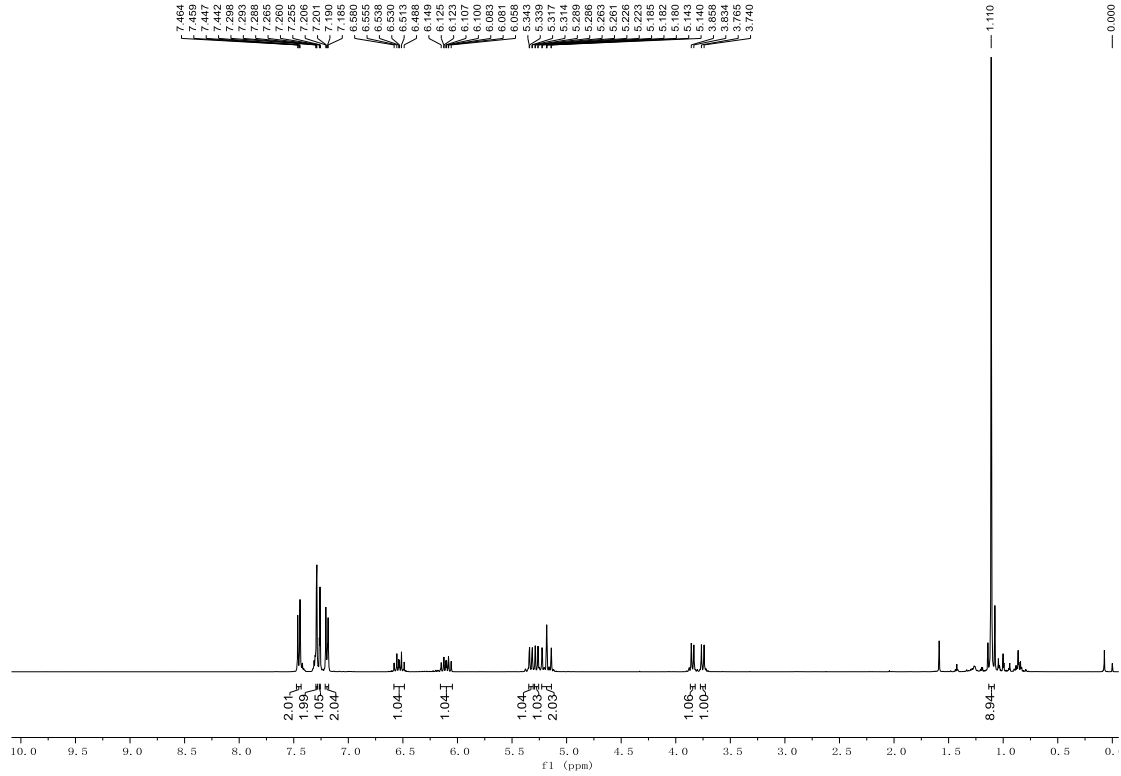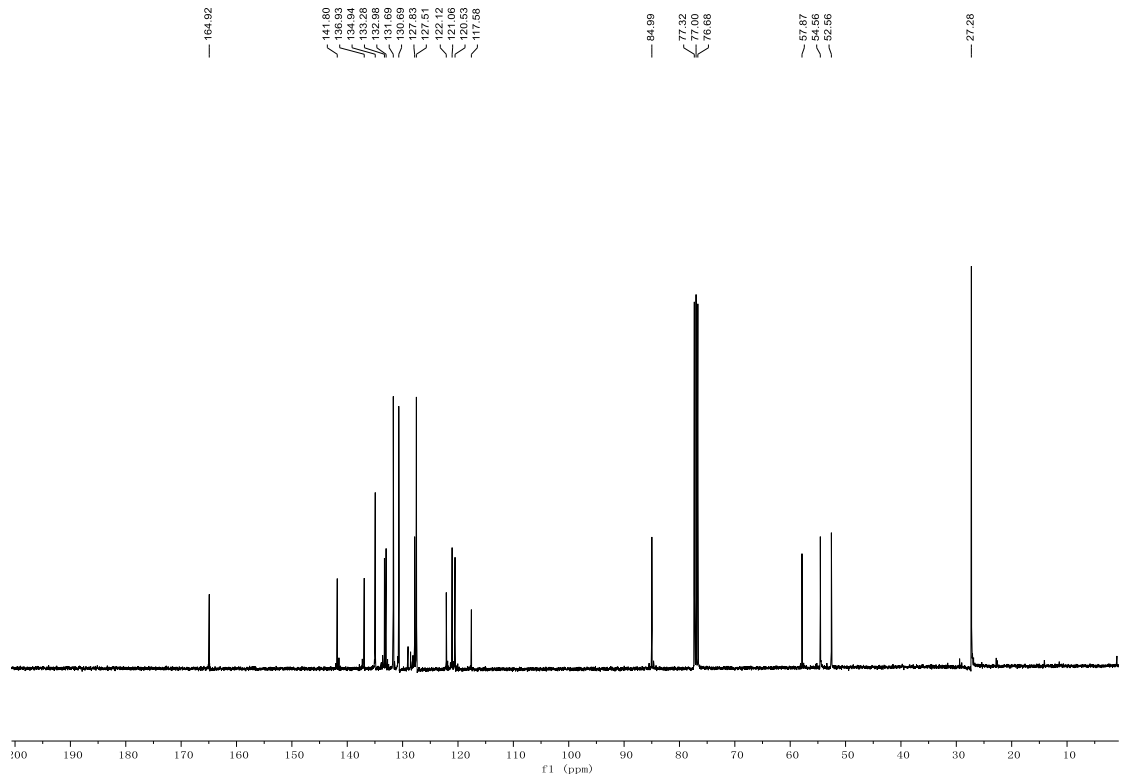

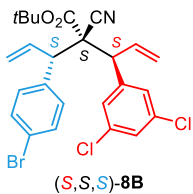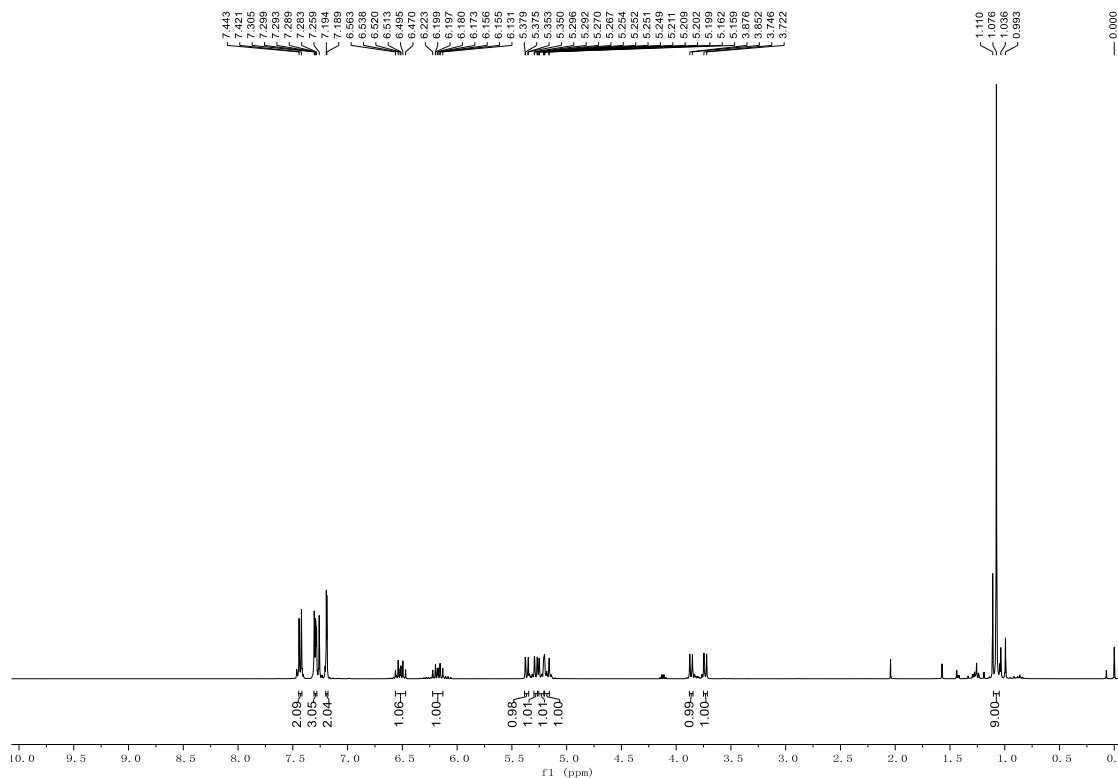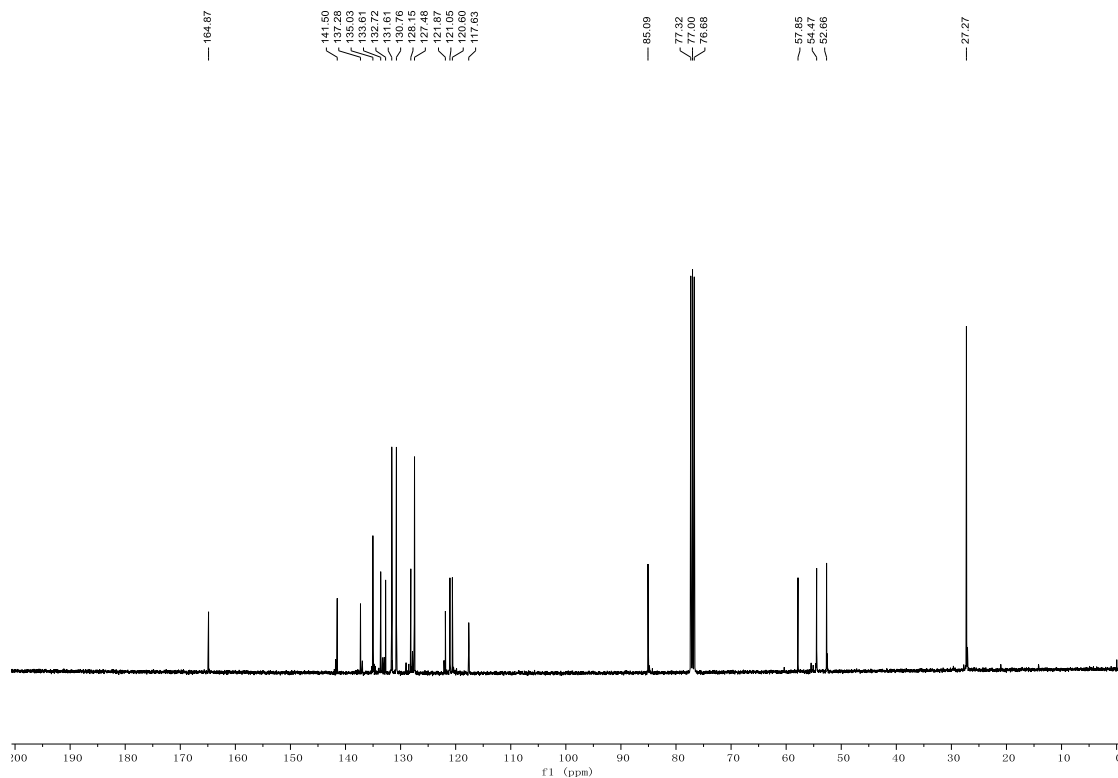

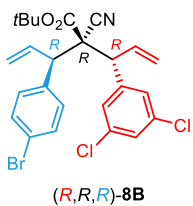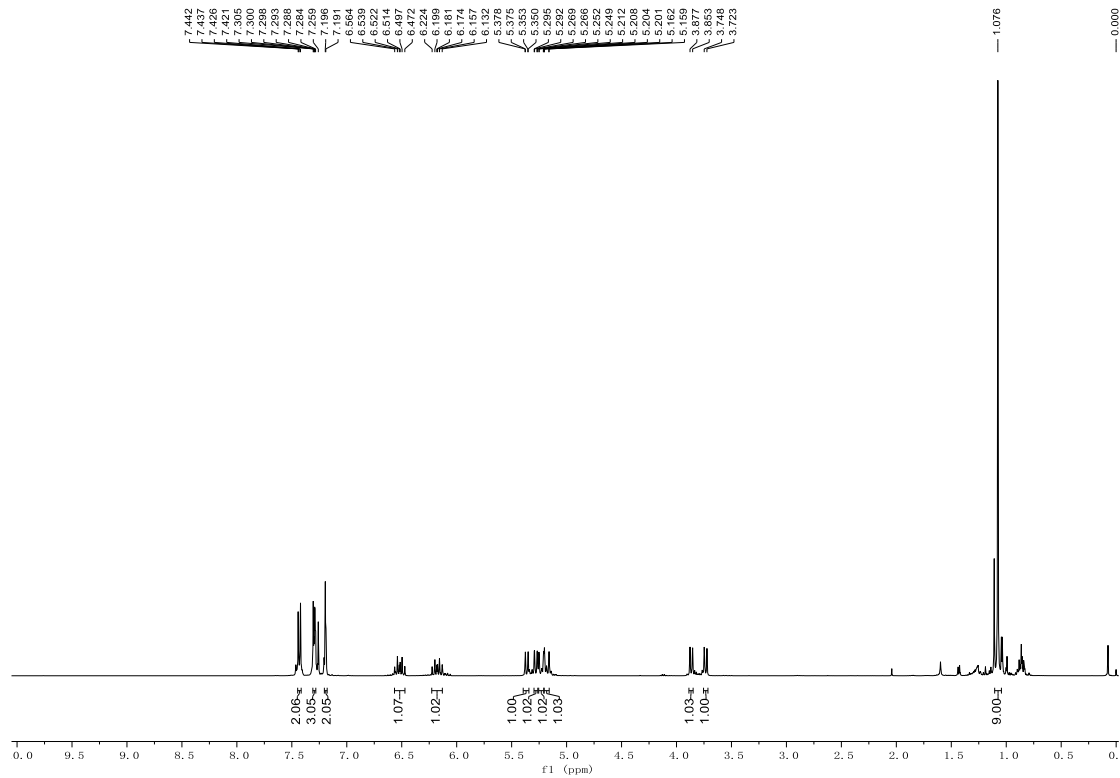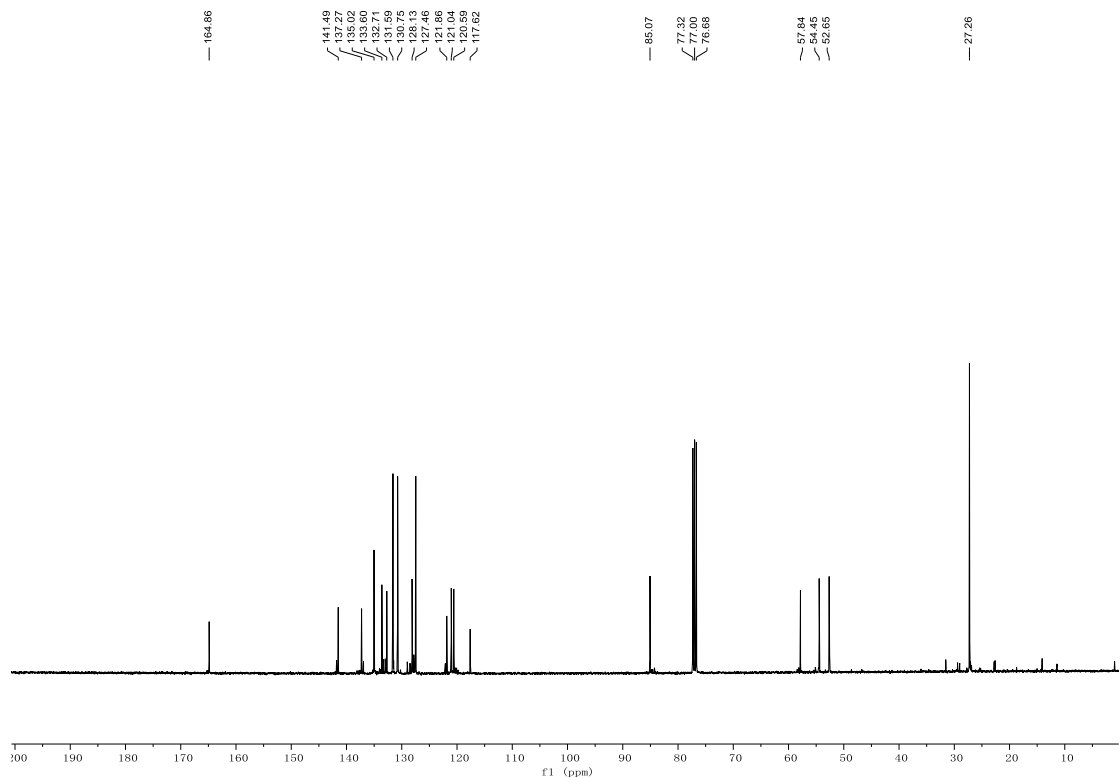

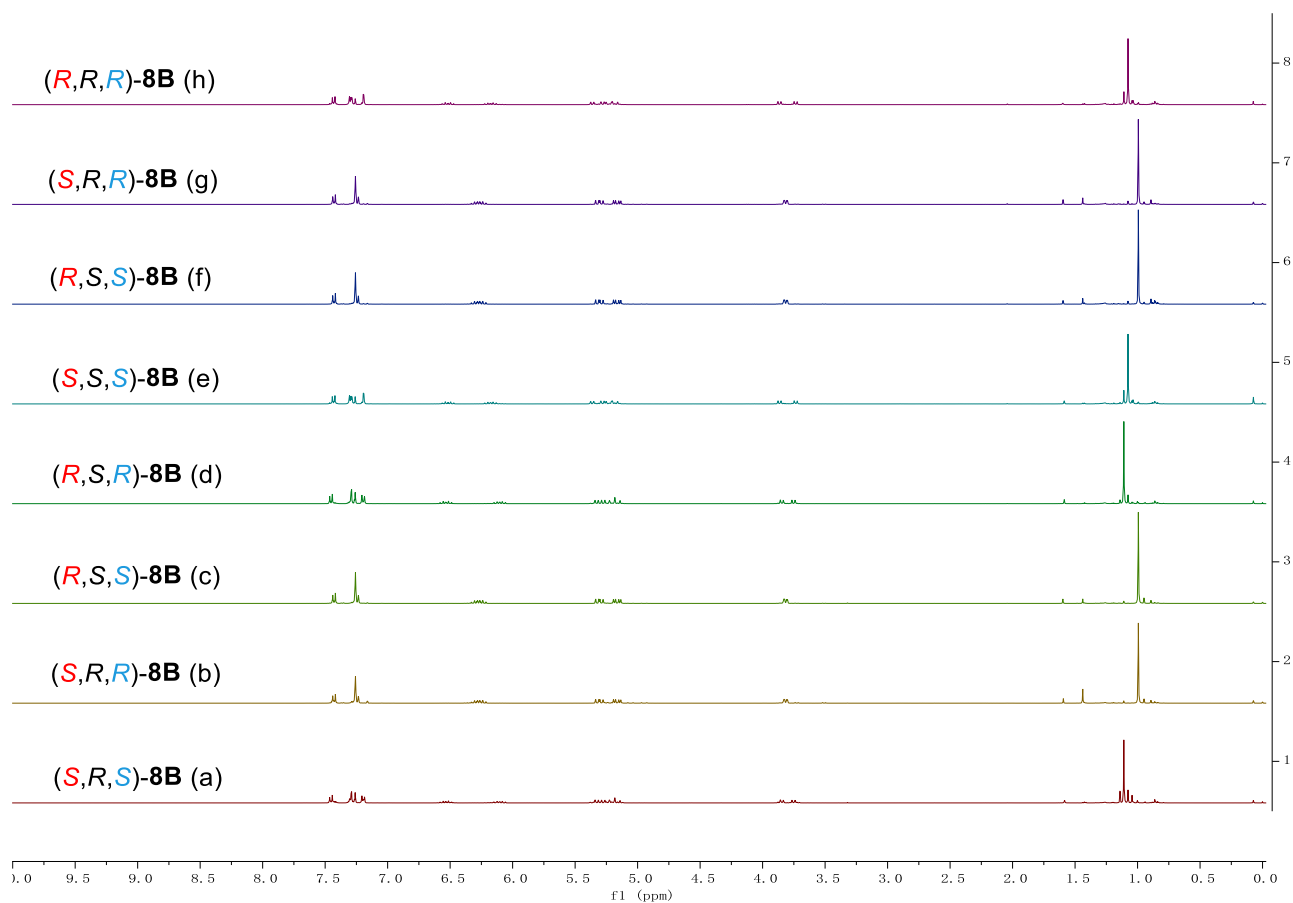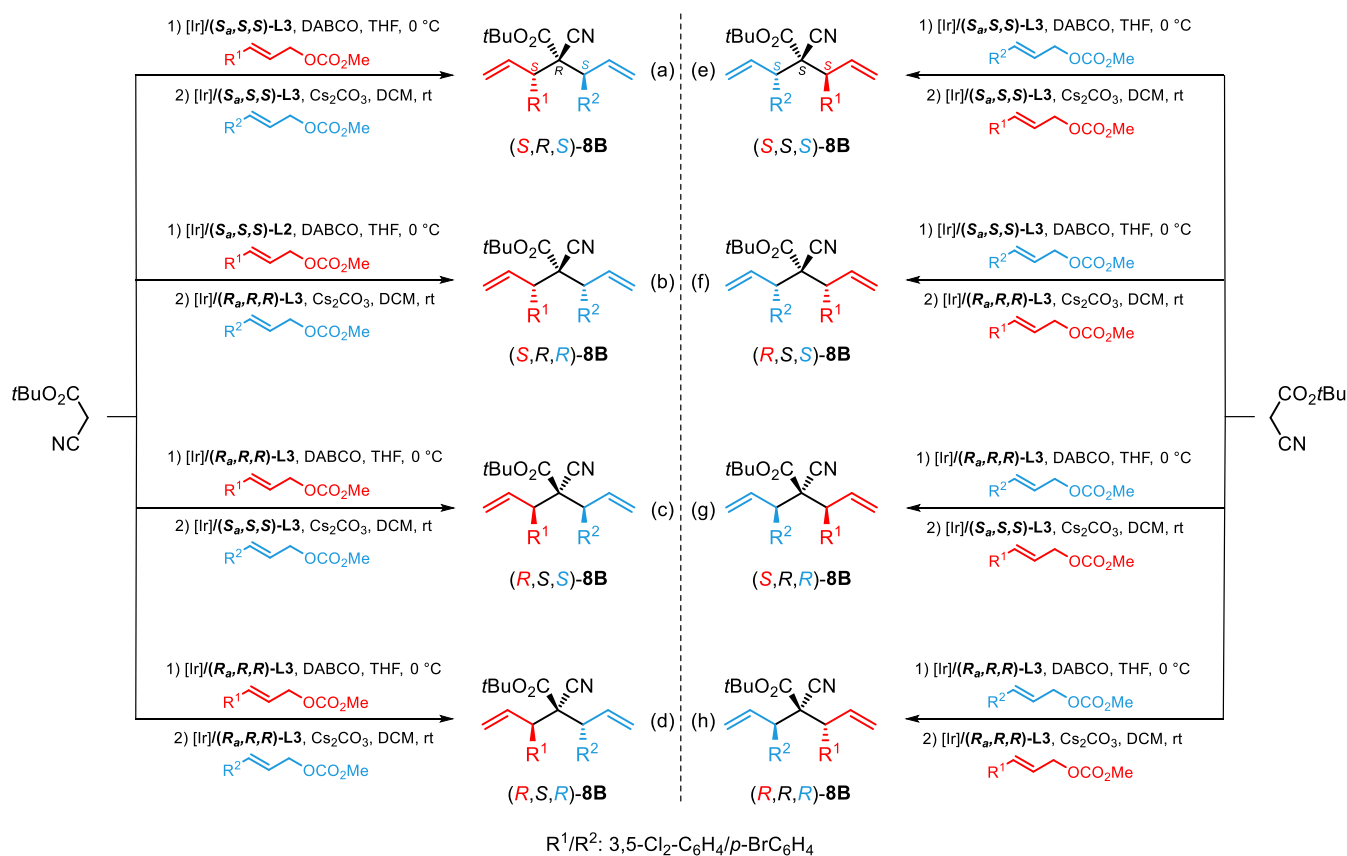

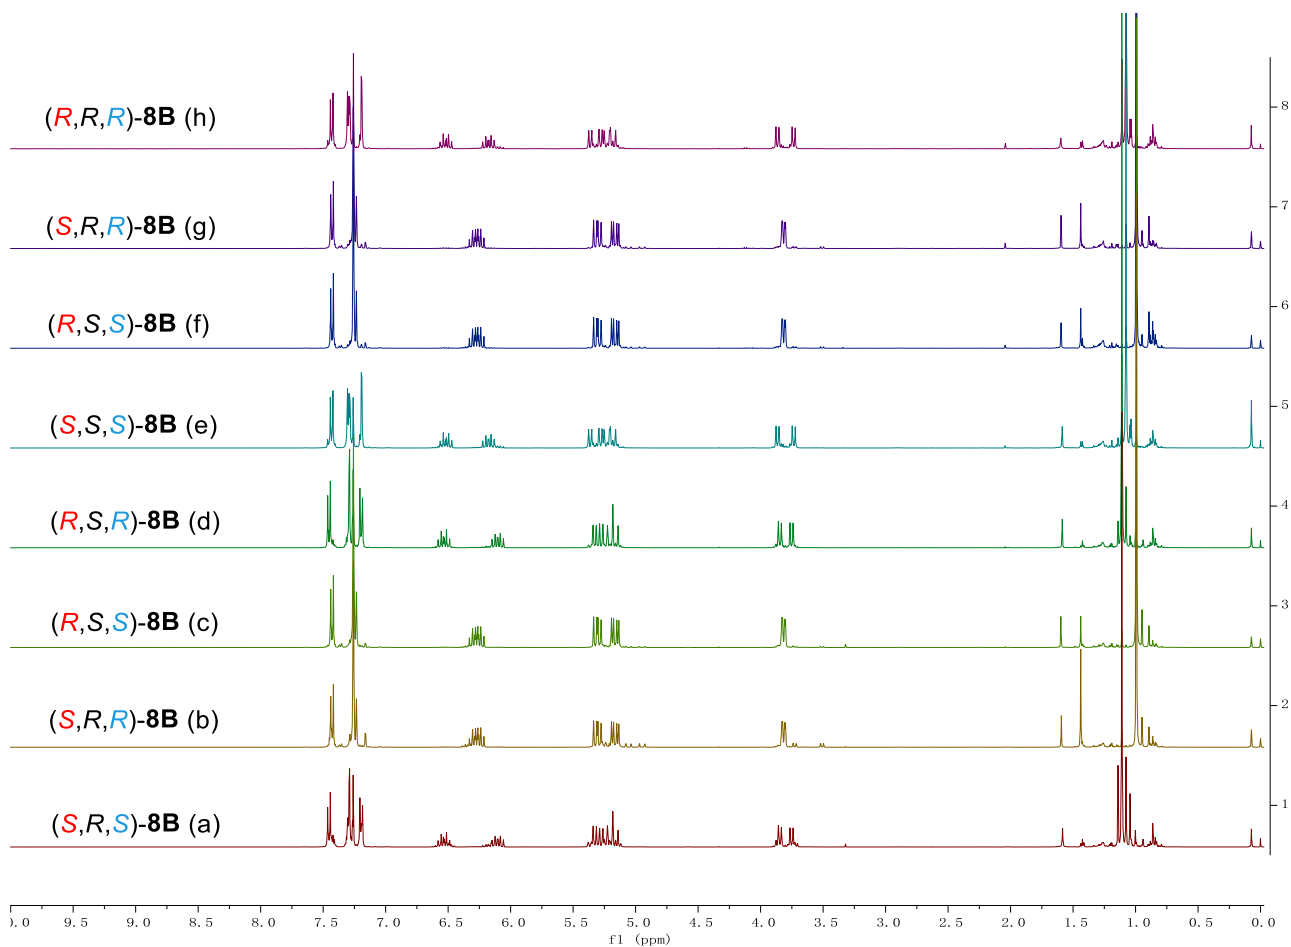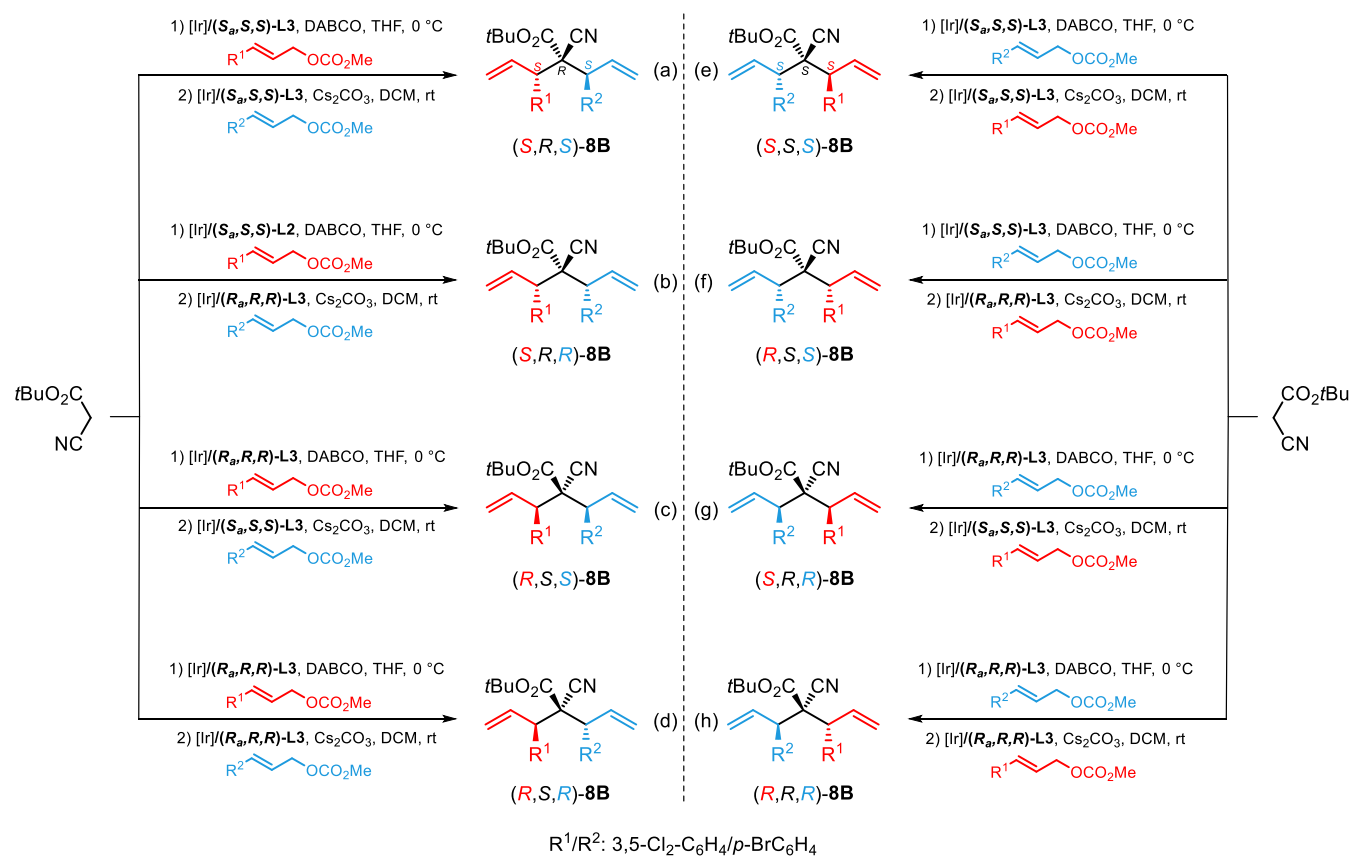

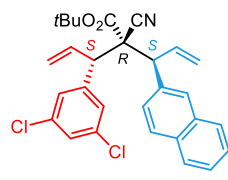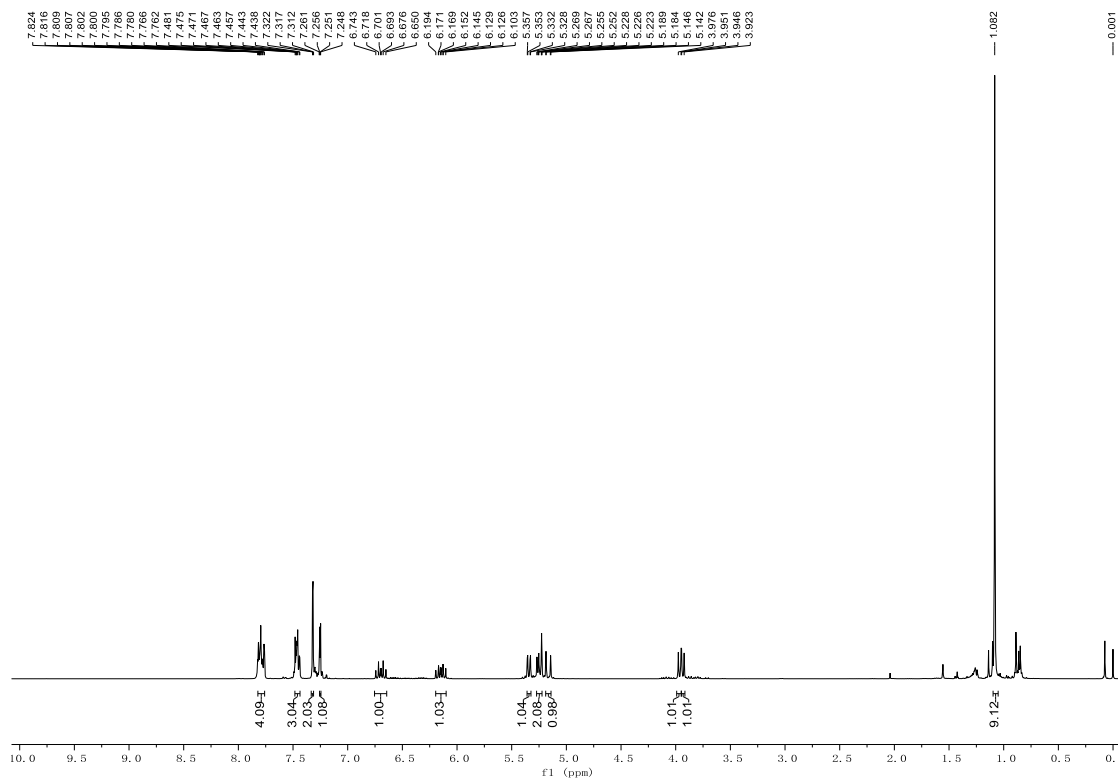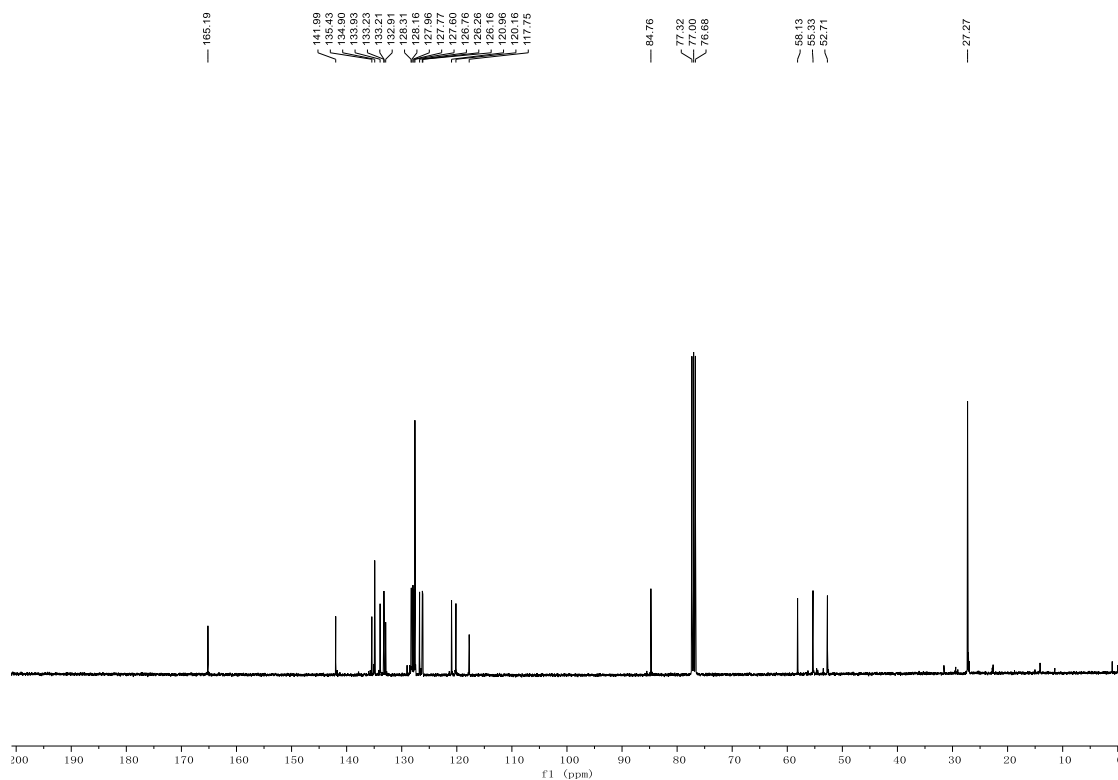

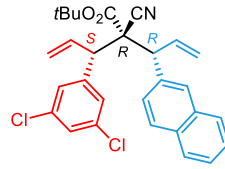

(S,R,R)-8C

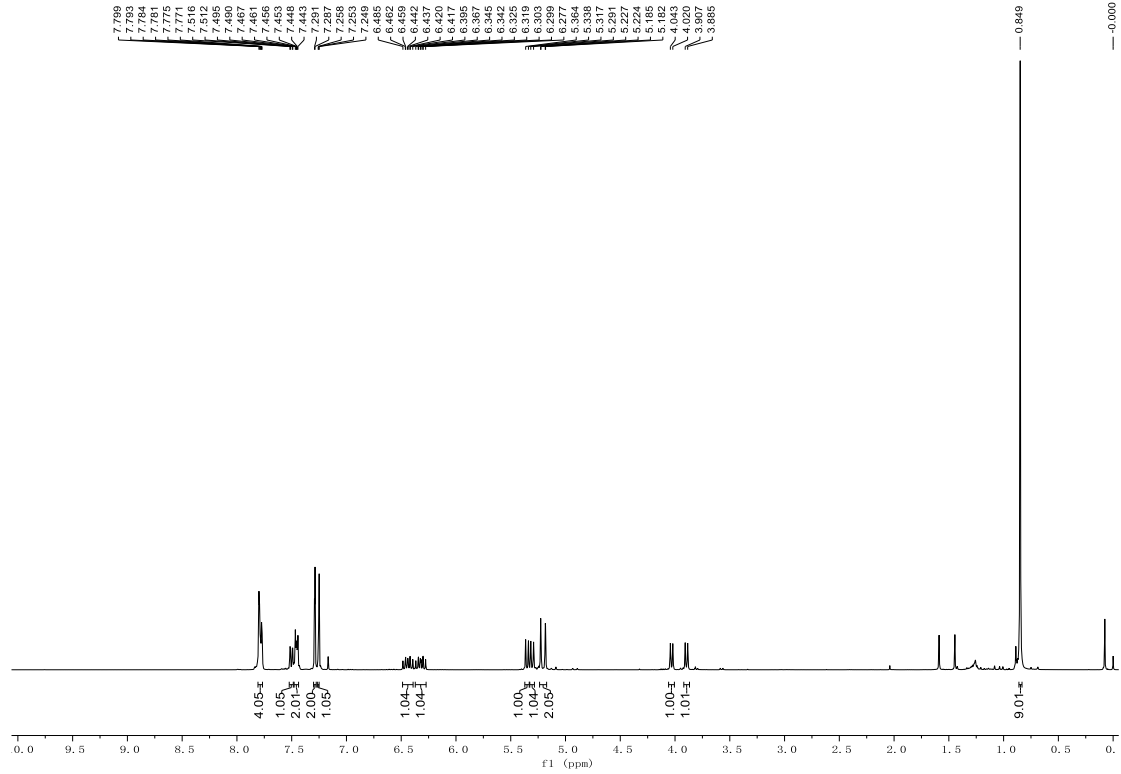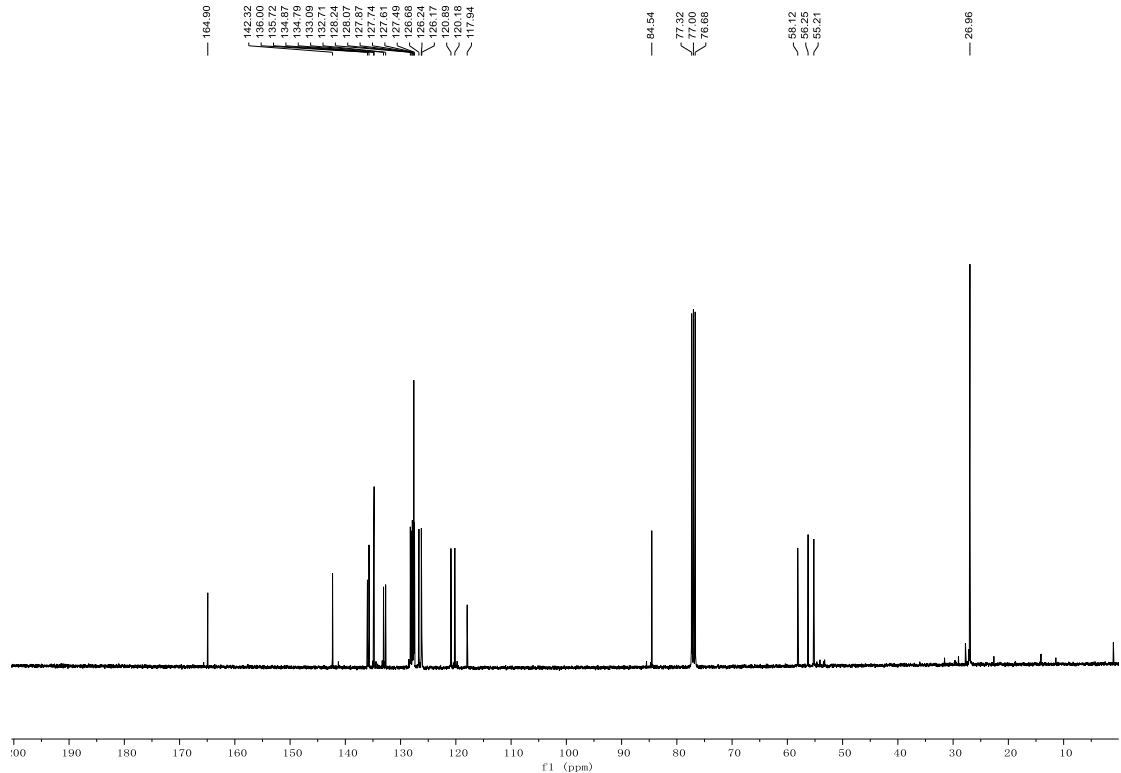

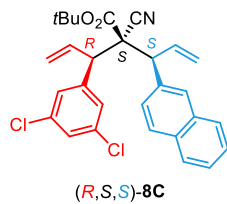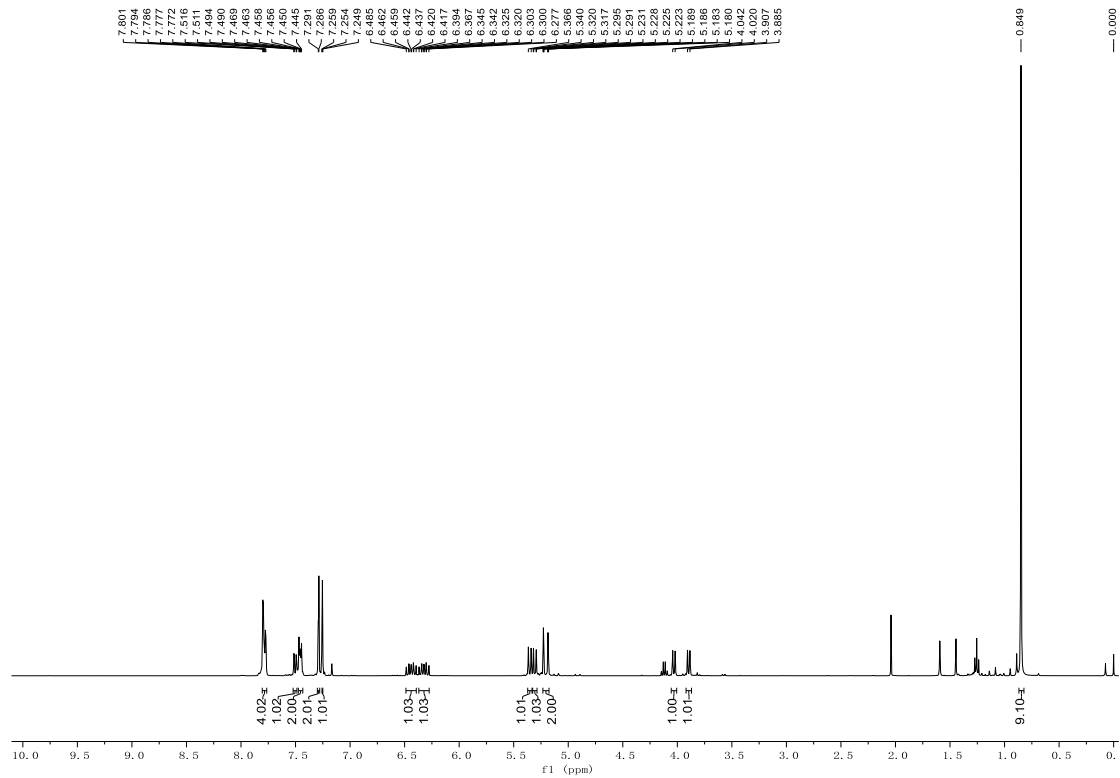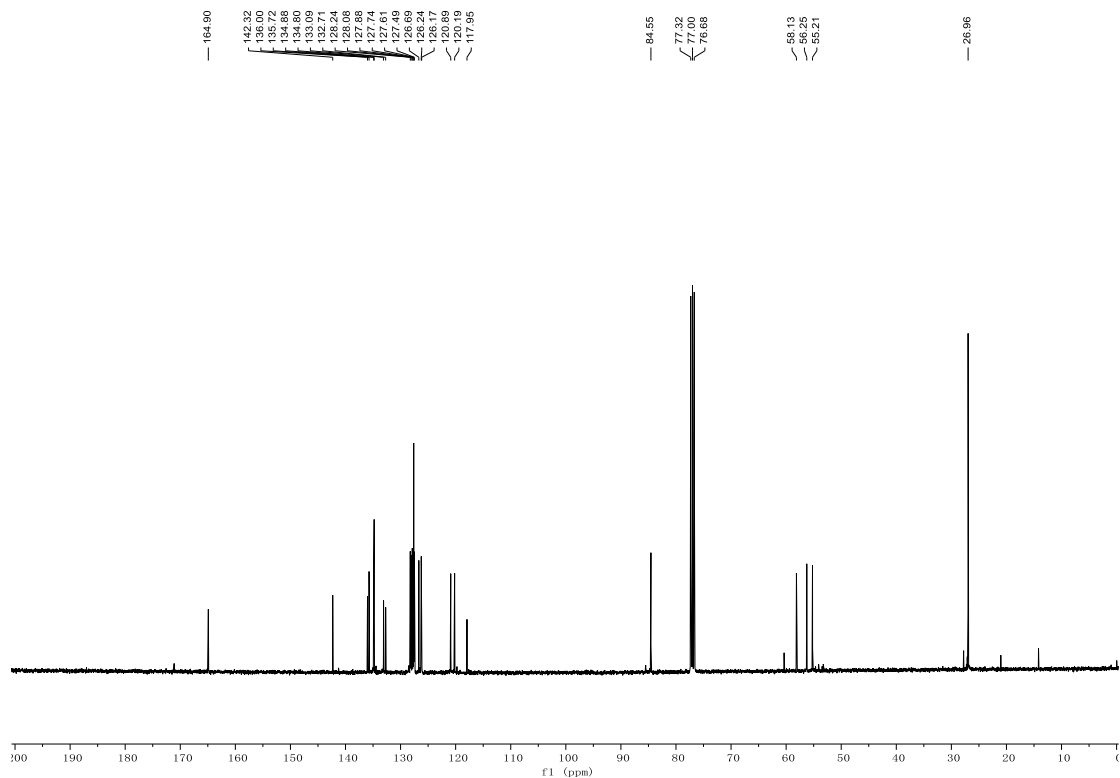



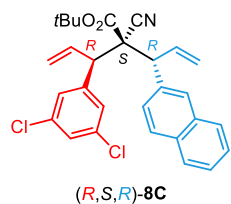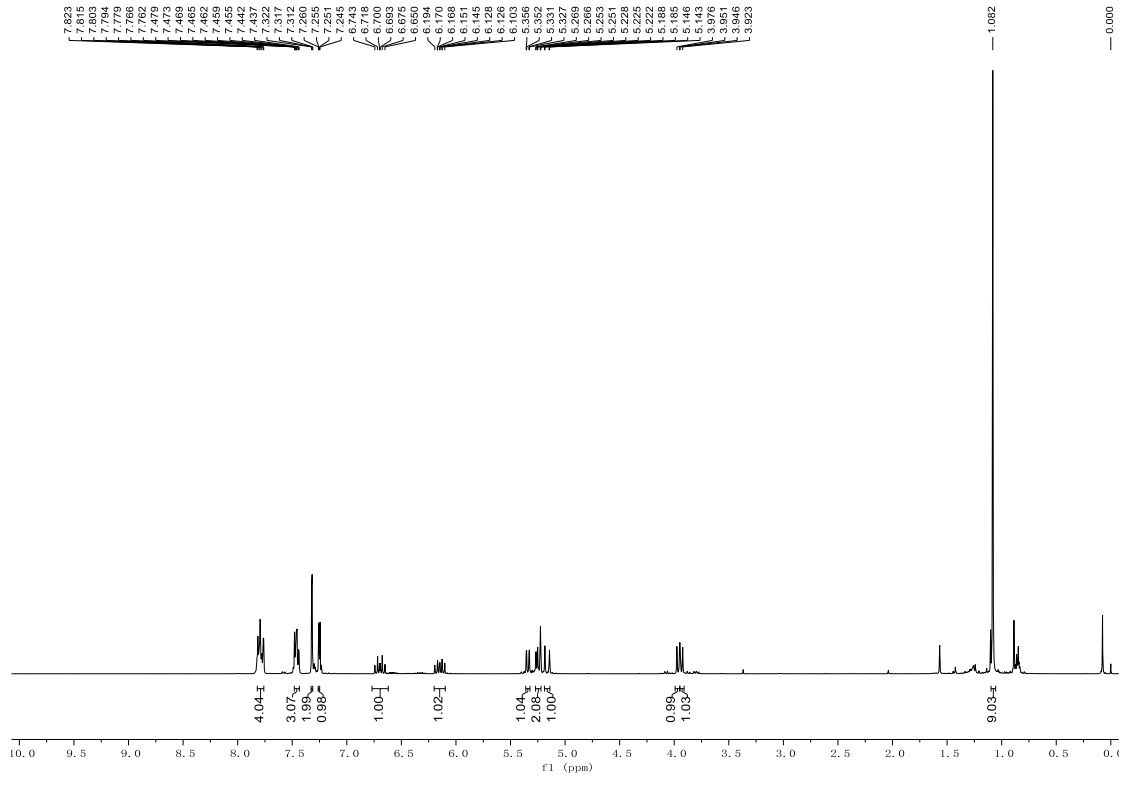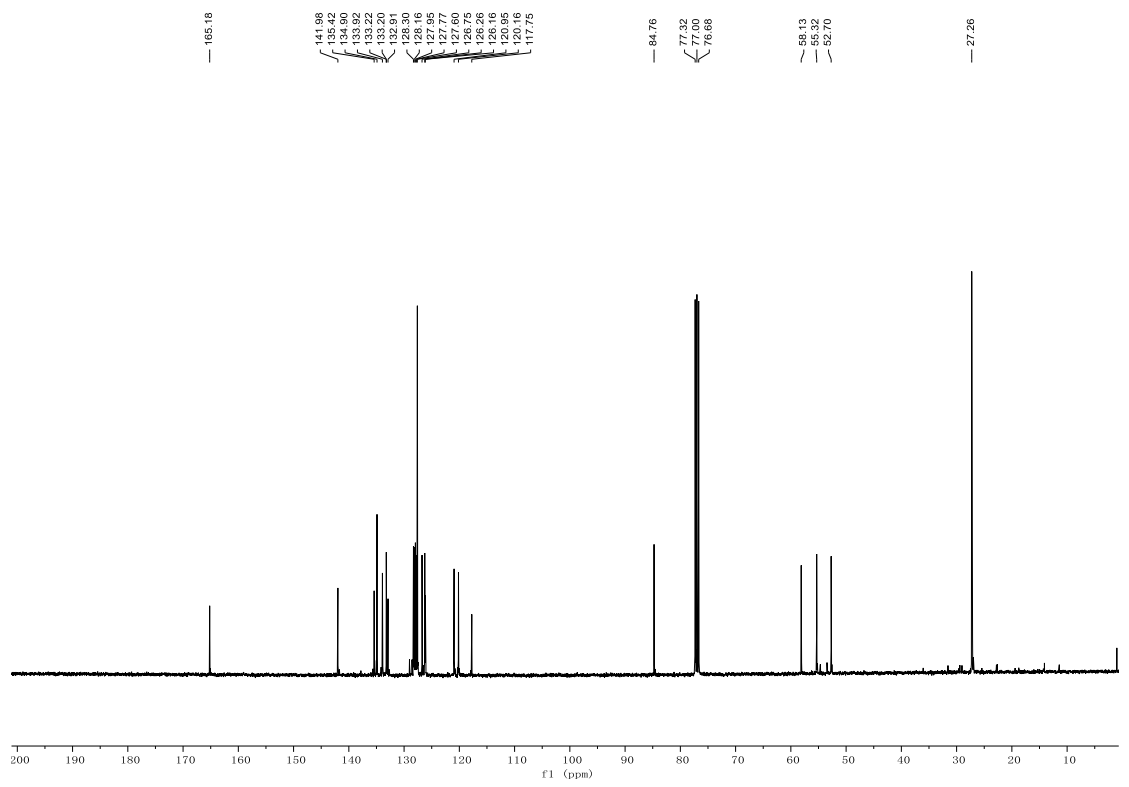

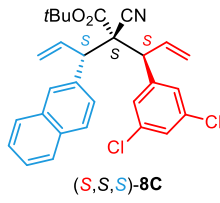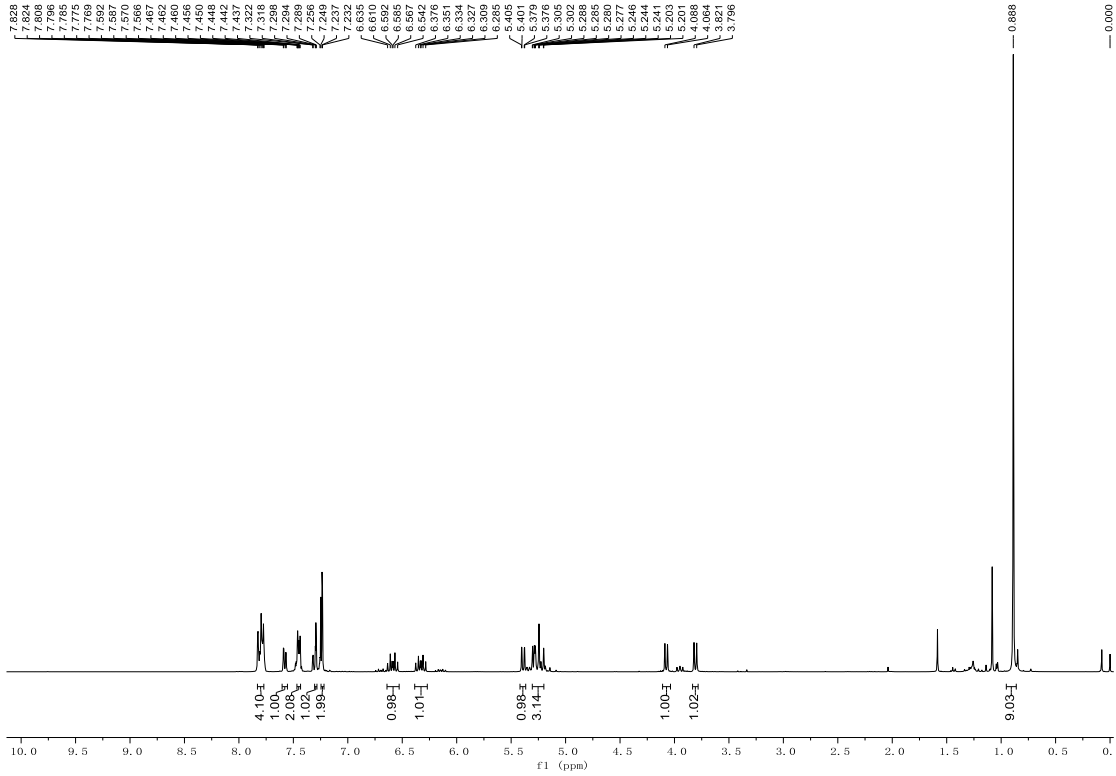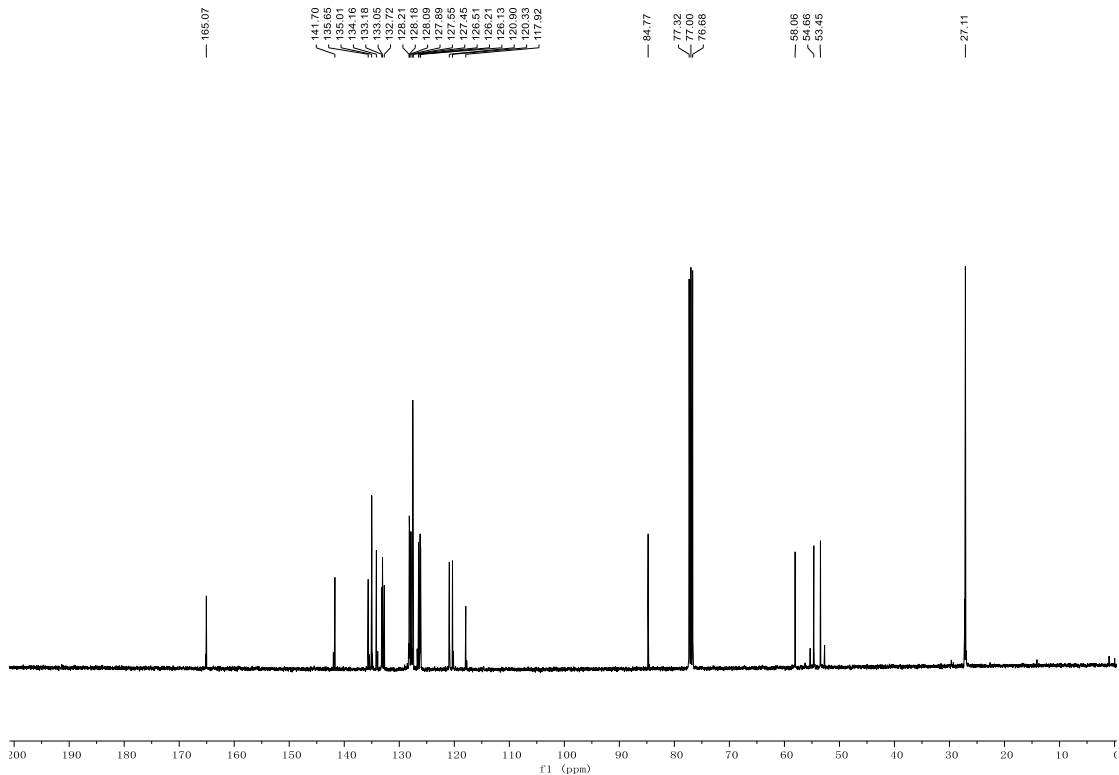

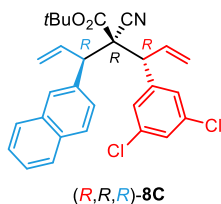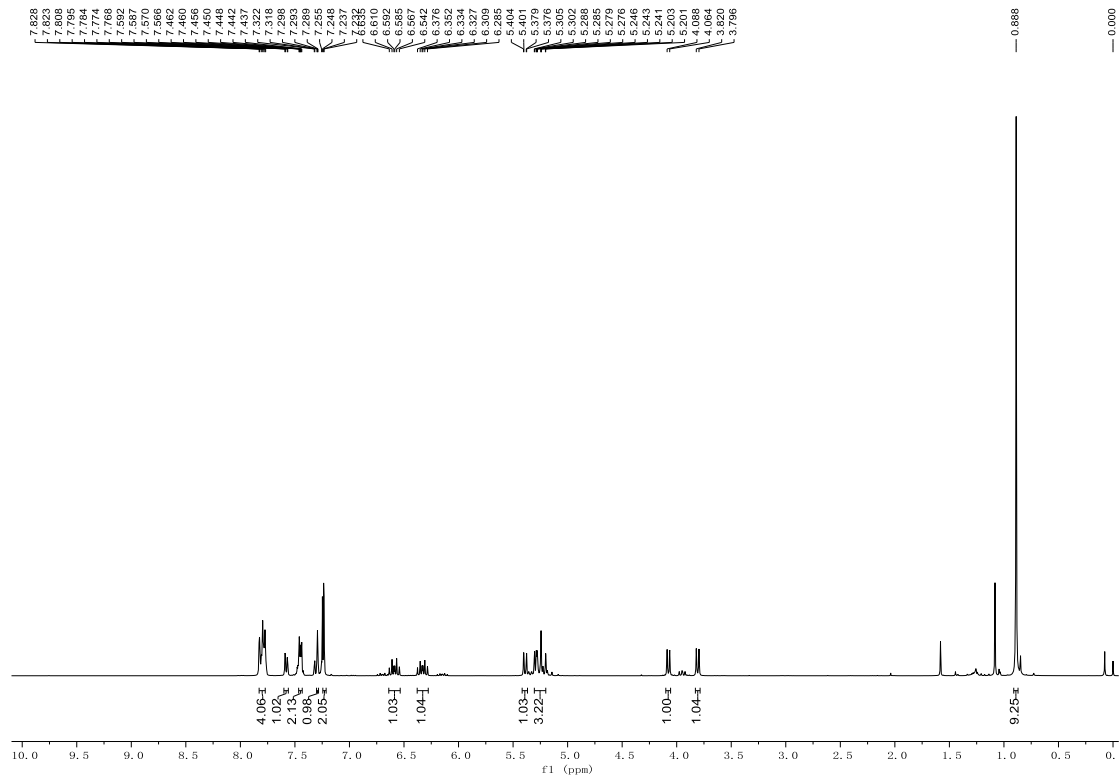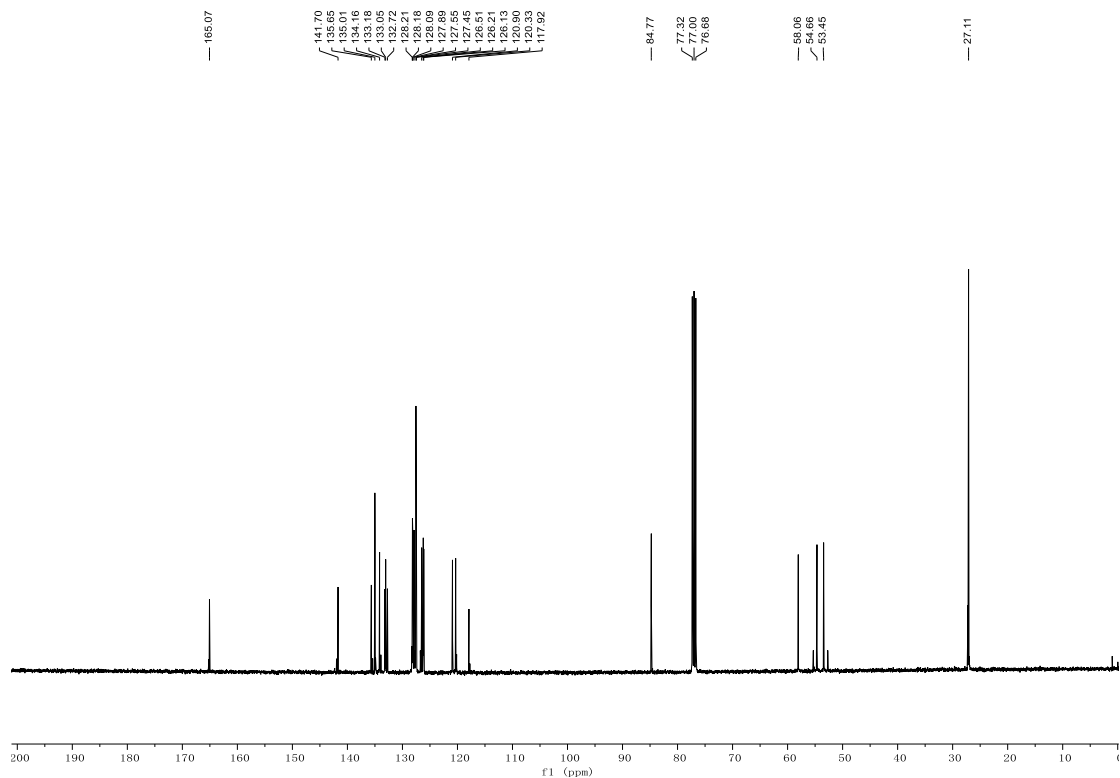

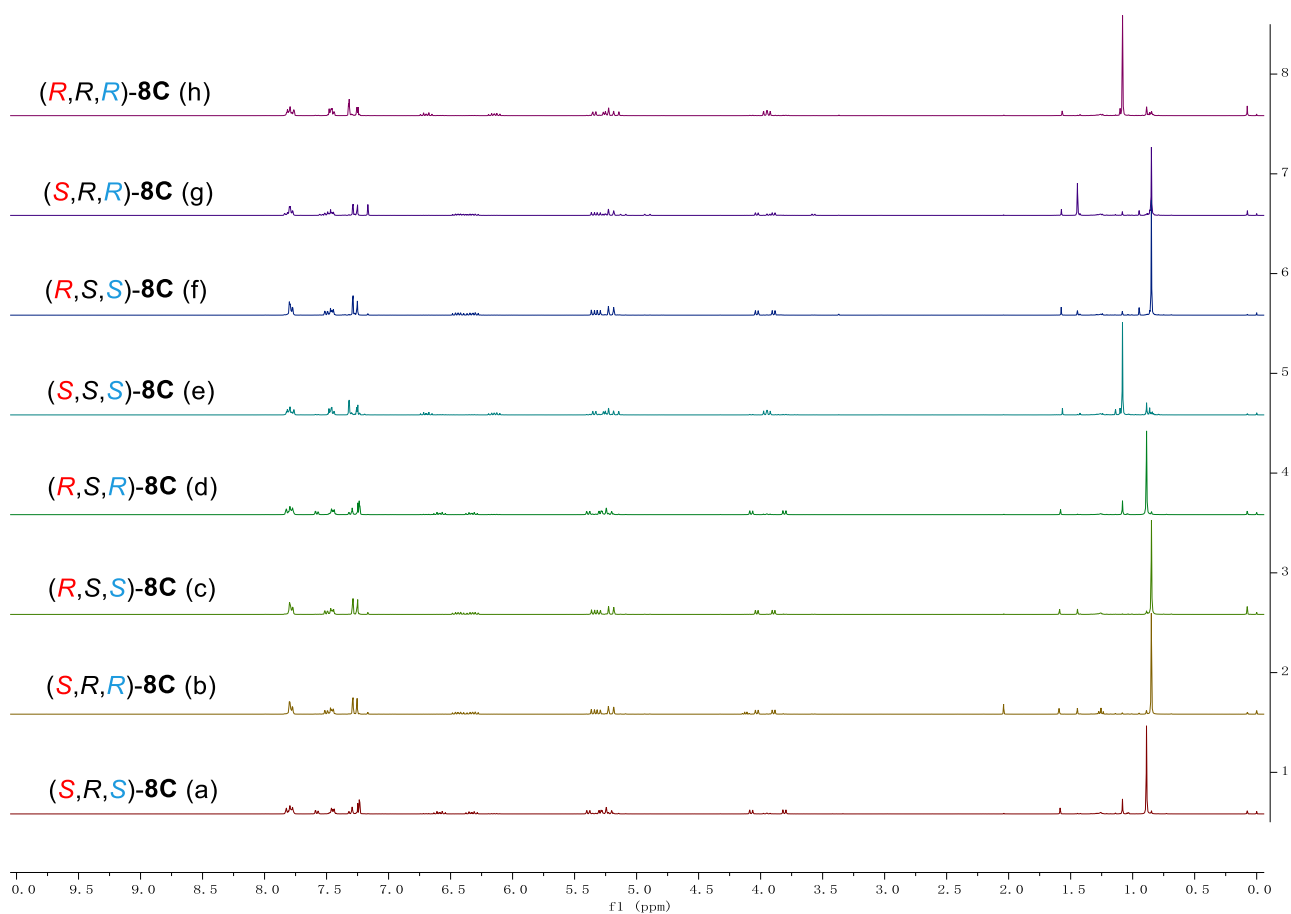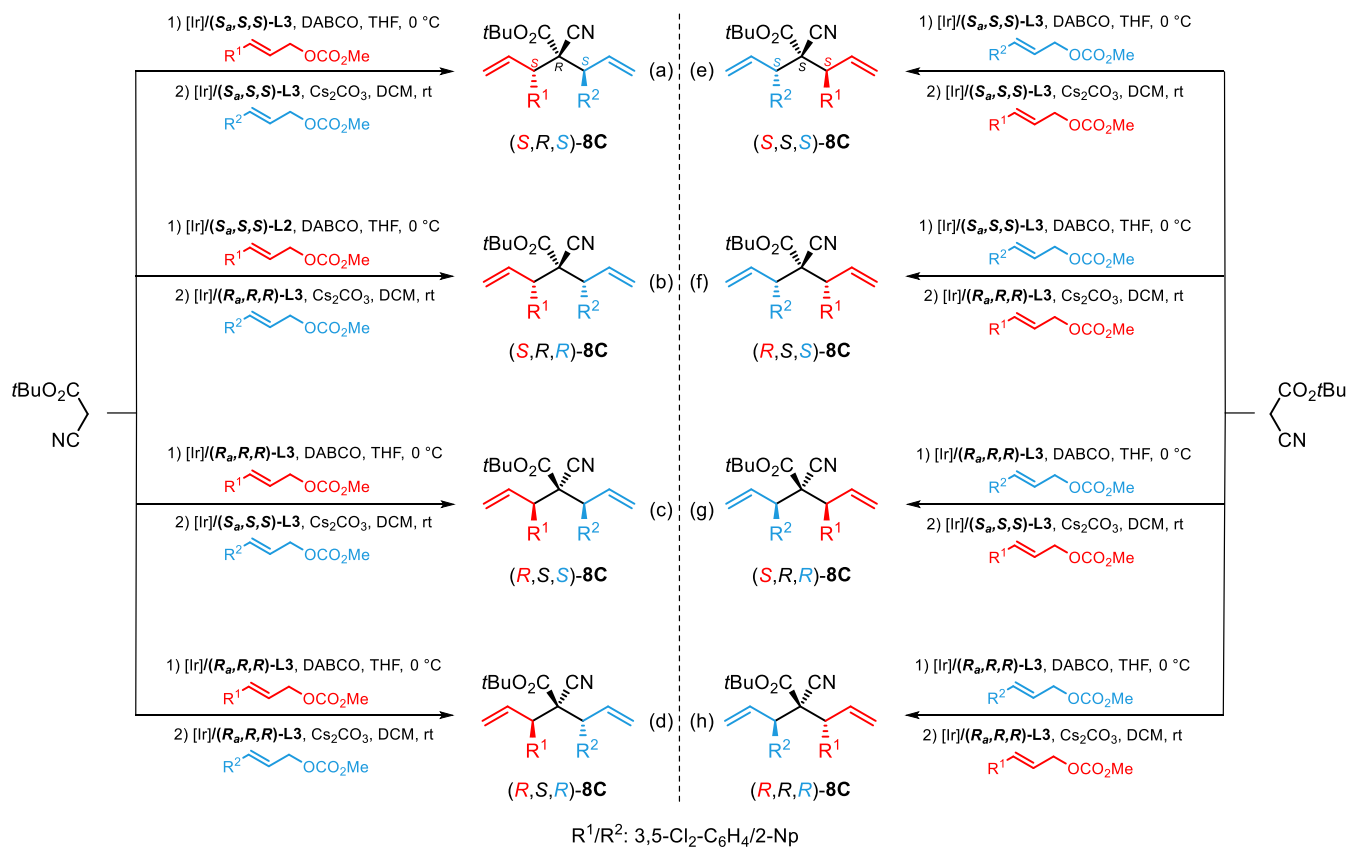

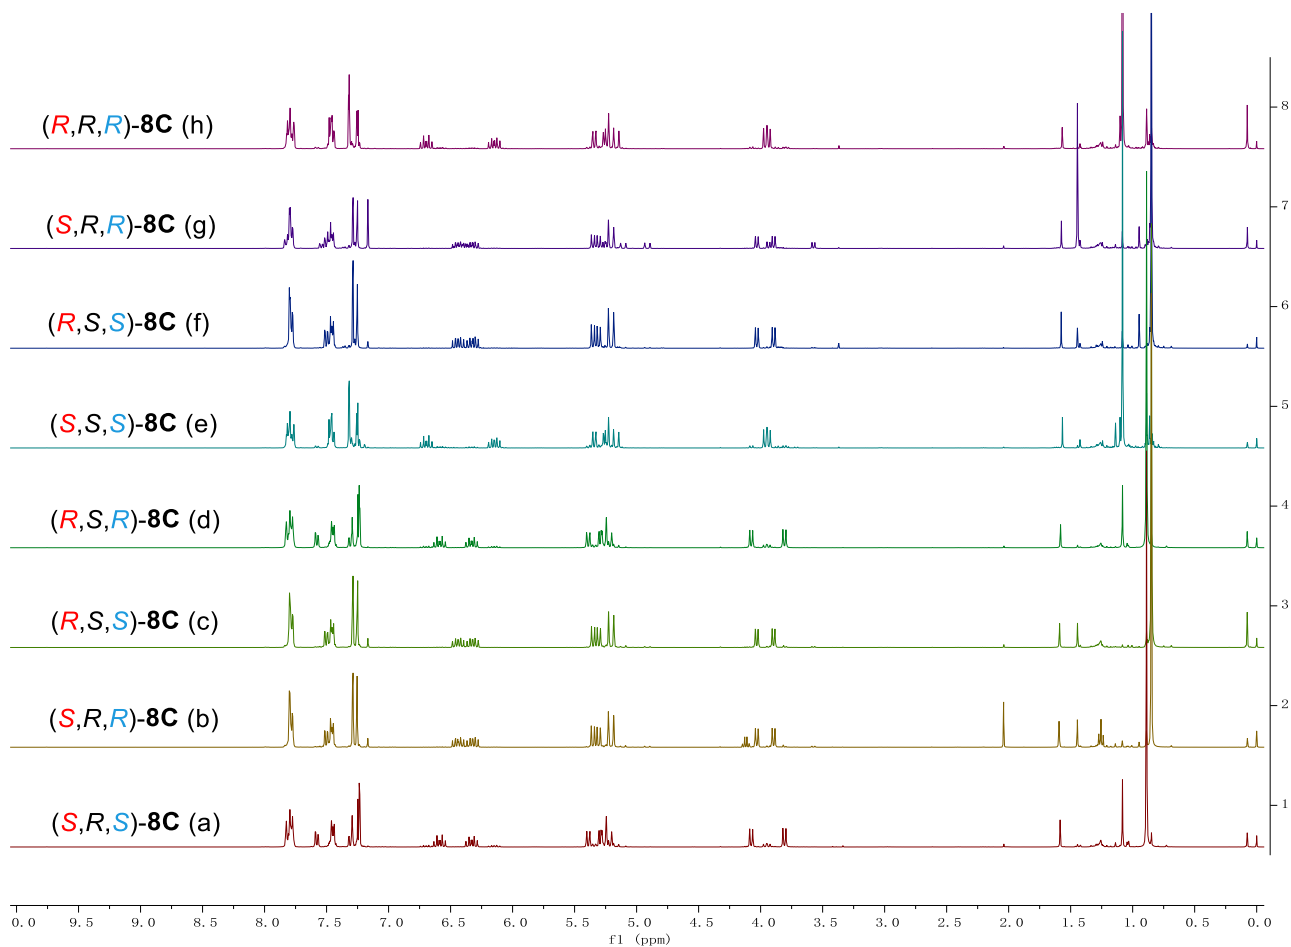

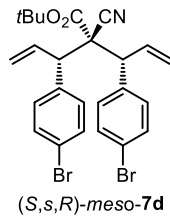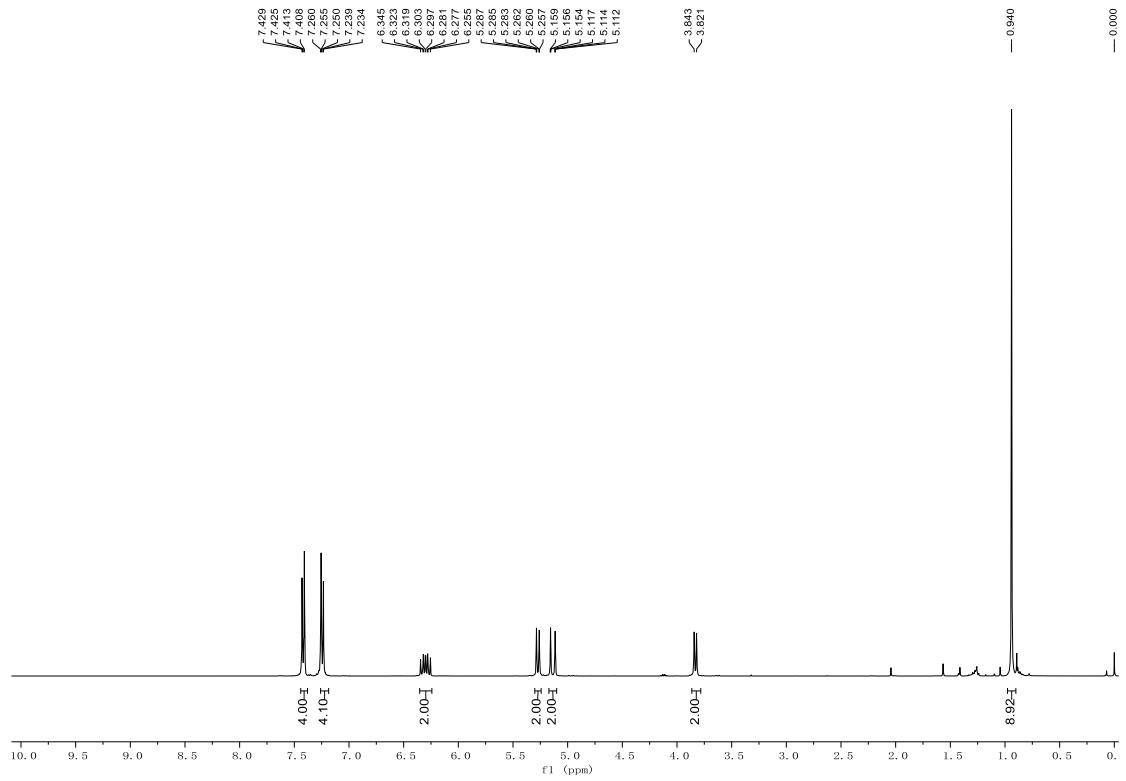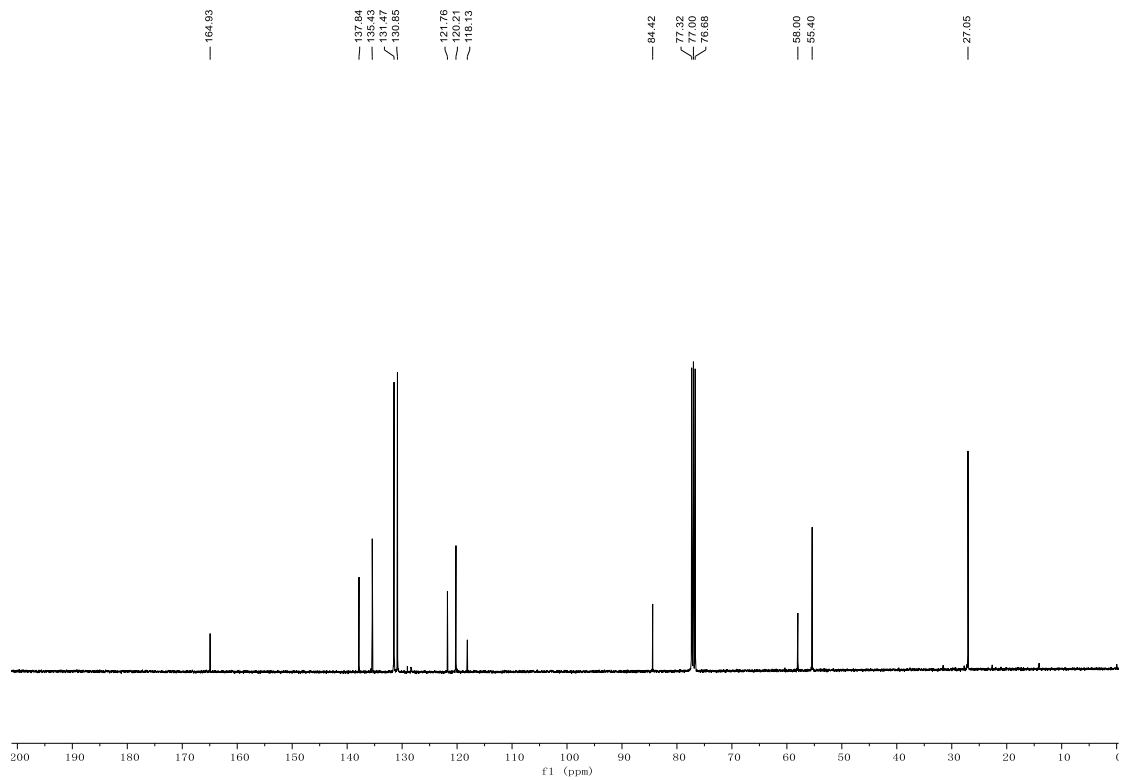

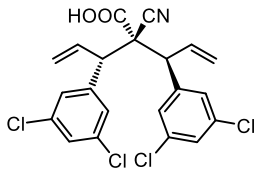

11

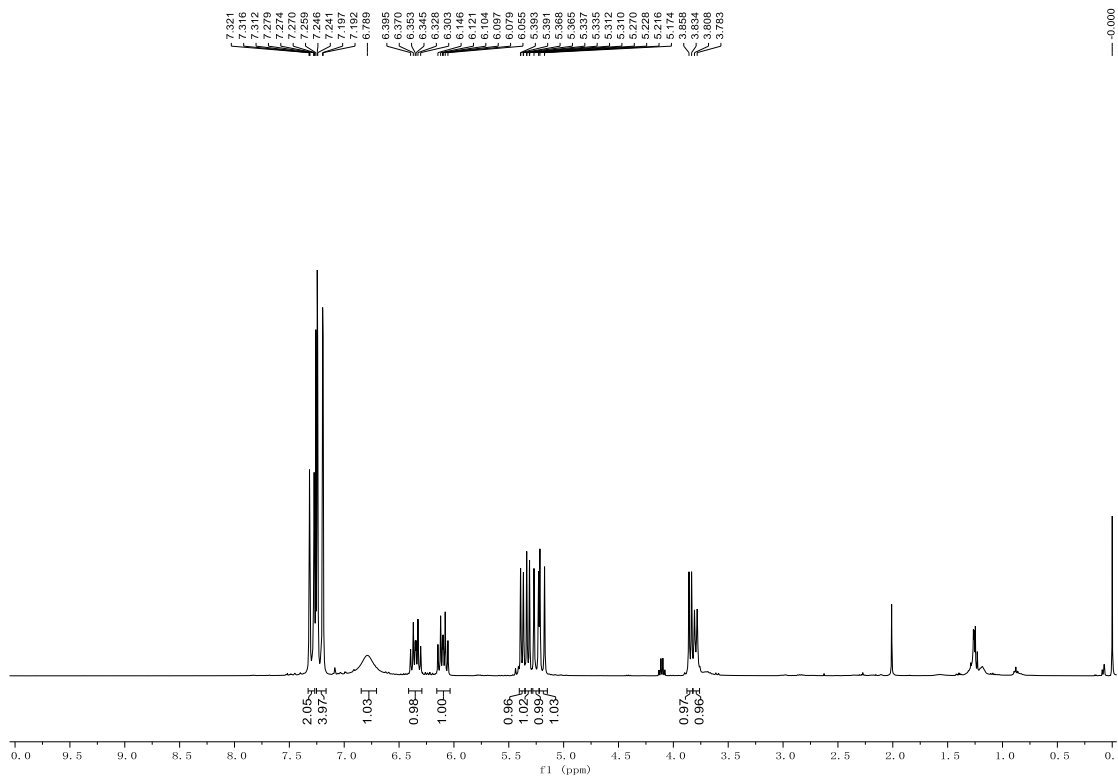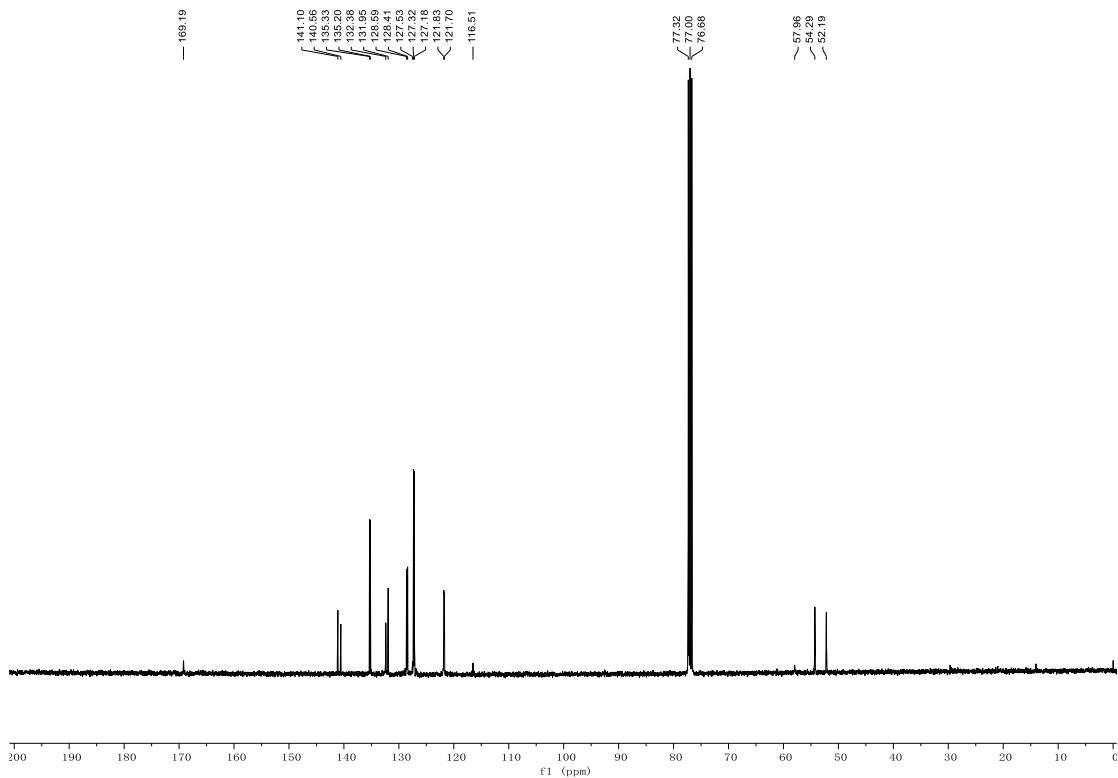

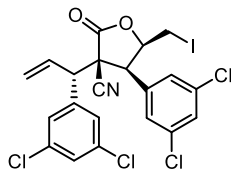

12

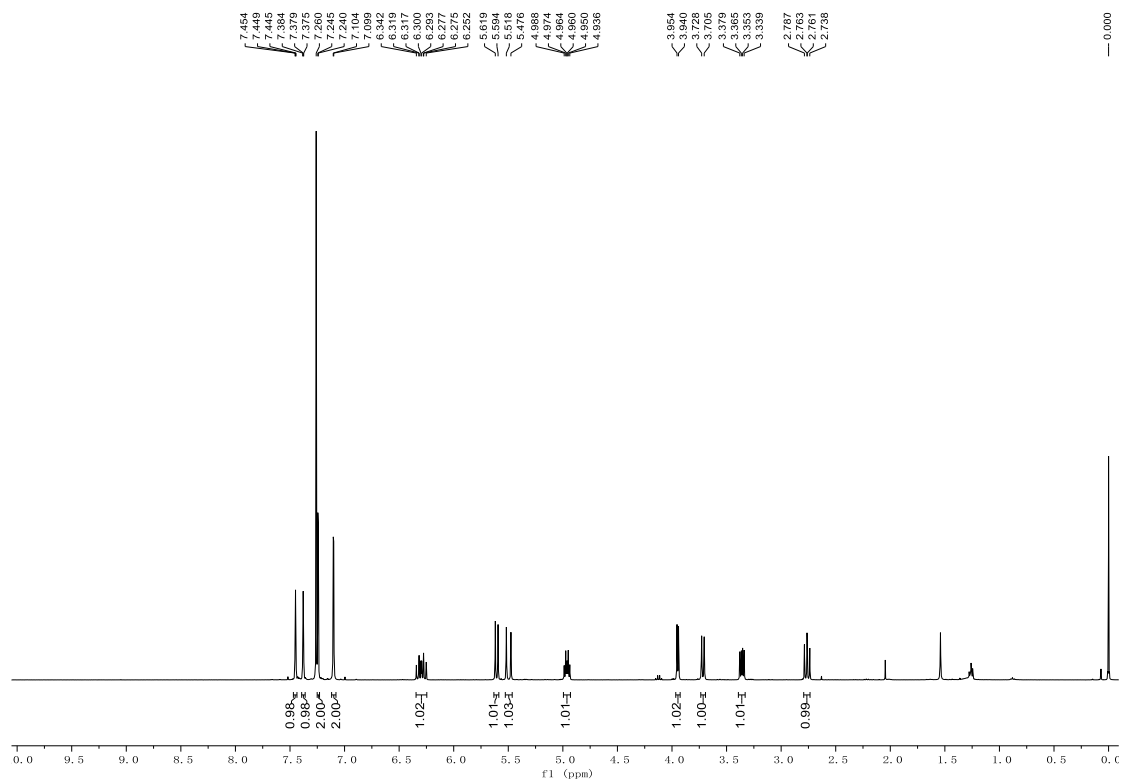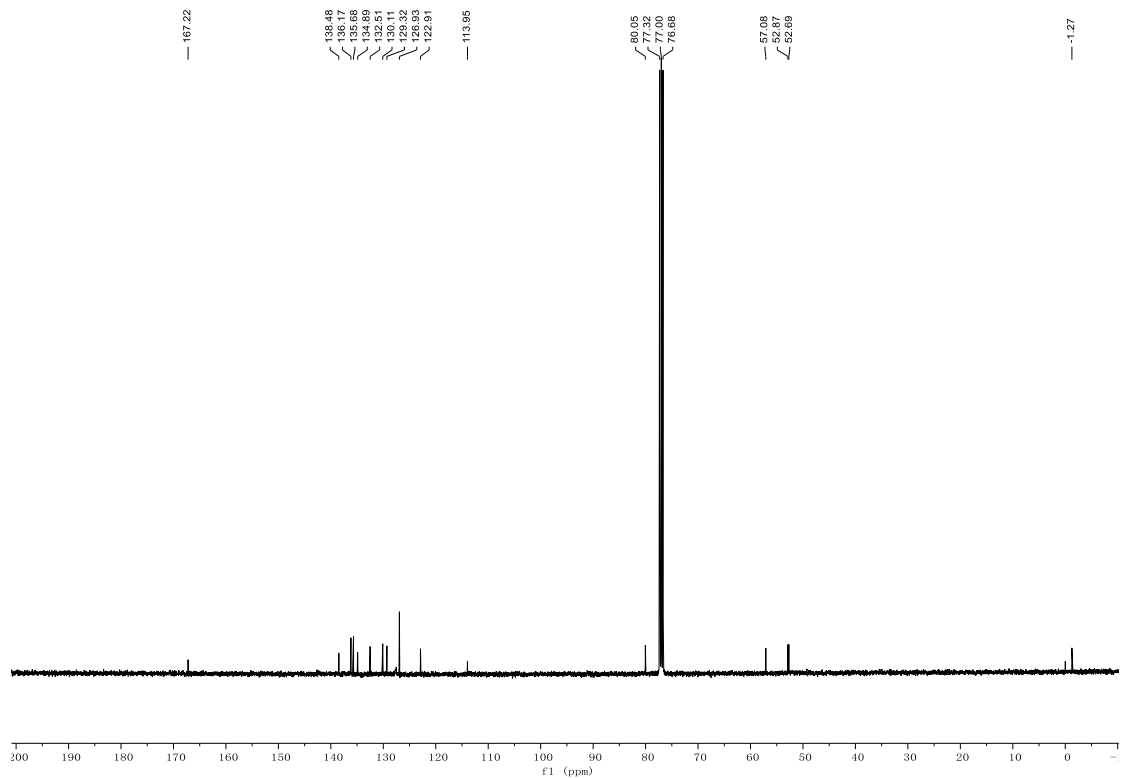



```

=====
Acq. Operator   : SYSTEM                      Seq. Line :    1
Acq. Instrument : 1260                      Location  :   86
Injection Date  : 1/7/2021 11:42:01 AM      Inj       :    1
                                           Inj Volume: 5.000 µl
Acq. Method     : E:\DATA\SC\SC-15-72\SC-15-72A-RAC 2021-01-07 11-40-39\SC-3-ID-80-20-DAD-1ML
                  -20MIN.M
Last changed    : 1/7/2021 11:40:39 AM by SYSTEM
Analysis Method : E:\DATA\SC\SC-15-72\SC-15-72A-RAC 2021-01-07 11-40-39\SC-3-ID-80-20-DAD-1ML
                  -20MIN.M (Sequence Method)
Last changed    : 4/7/2021 6:06:55 PM by SYSTEM
                  (modified after loading)
Additional Info : Peak(s) manually integrated
  
```

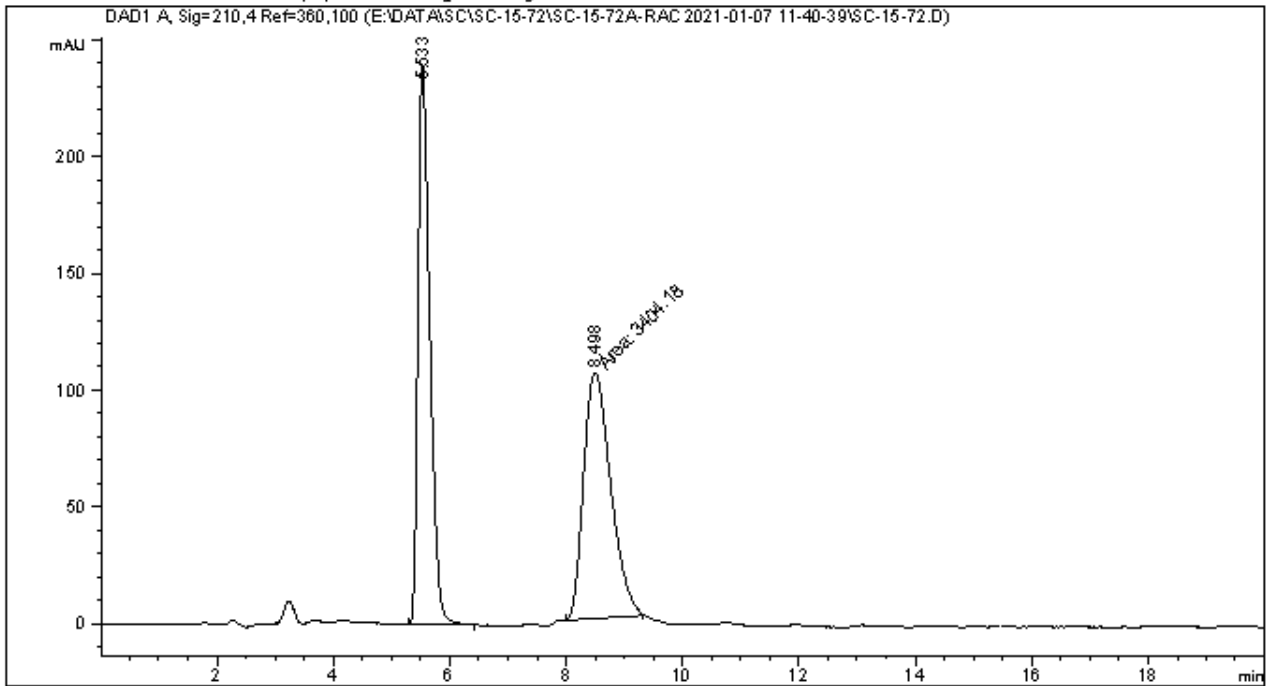

=====  
 Area Percent Report  
 =====

```

Sorted By      :      Signal
Multiplier     :      1.0000
Dilution       :      1.0000
Do not use Multiplier & Dilution Factor with ISTDs
  
```

Signal 1: DAD1 A, Sig=210,4 Ref=360,100

| Peak # | RetTime [min] | Type | Width [min] | Area [mAU*s] | Height [mAU] | Area %  |
|--------|---------------|------|-------------|--------------|--------------|---------|
| 1      | 5.533         | BB   | 0.2107      | 3381.61597   | 239.52287    | 49.8338 |
| 2      | 8.498         | MM   | 0.5399      | 3404.17749   | 105.07890    | 50.1662 |

Totals :                      6785.79346    344.60178

Data File E:\DATA\SC\SC-15-72\SC-15-72 2021-01-07 10-53-28\SC-15-721.D  
 Sample Name: SC-15-72B

```

=====
Acq. Operator   : SYSTEM                      Seq. Line :    2
Acq. Instrument : 1260                        Location  :   85
Injection Date  : 1/7/2021 11:16:14 AM       Inj       :    1
                                           Inj Volume: 5.000 µl
Acq. Method     : E:\DATA\SC\SC-15-72\SC-15-72 2021-01-07 10-53-28\SC-3-ID-80-20-DAD-1ML-
                20MIN.M
Last changed    : 1/7/2021 10:53:28 AM by SYSTEM
Analysis Method : E:\DATA\SC\SC-15-72\SC-15-72 2021-01-07 10-53-28\SC-3-ID-80-20-DAD-1ML-
                20MIN.M (Sequence Method)
Last changed    : 4/7/2021 6:07:34 PM by SYSTEM
                (modified after loading)
Additional Info : Peak(s) manually integrated
  
```

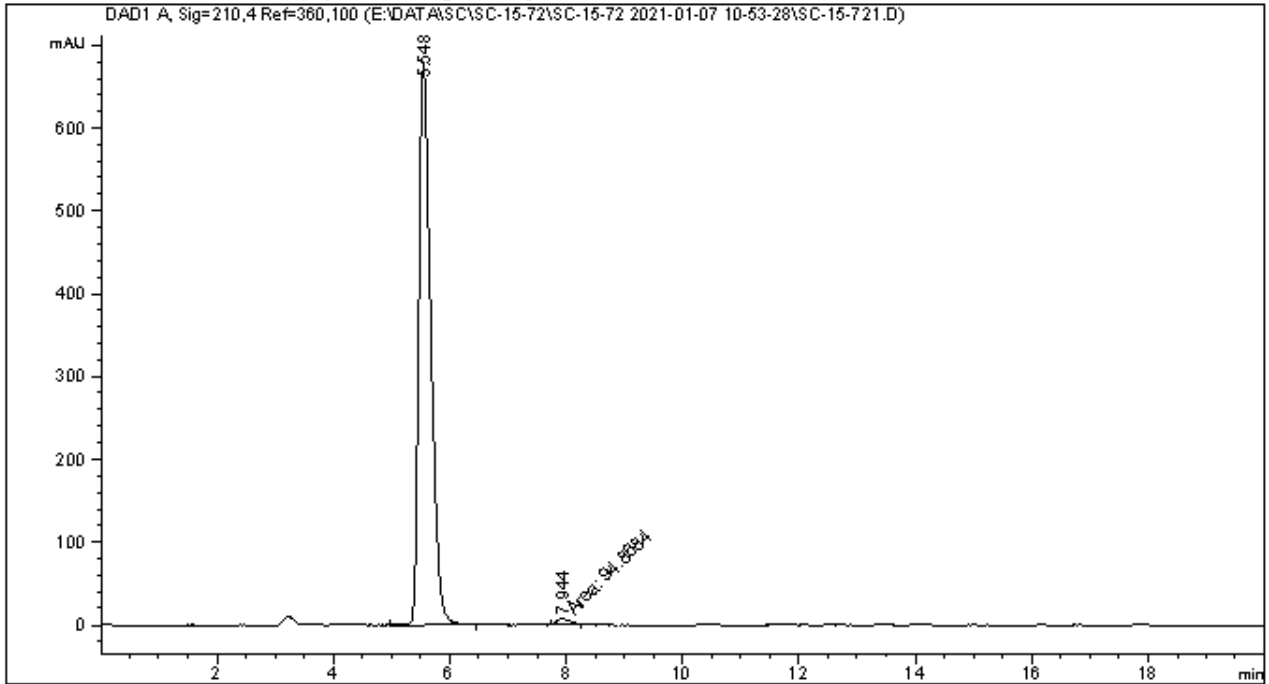

=====  
 Area Percent Report  
 =====

```

Sorted By      :      Signal
Multiplier     :      1.0000
Dilution       :      1.0000
Do not use Multiplier & Dilution Factor with ISTDs
  
```

Signal 1: DAD1 A, Sig=210,4 Ref=360,100

| Peak # | RetTime [min] | Type | Width [min] | Area [mAU*s] | Height [mAU] | Area %  |
|--------|---------------|------|-------------|--------------|--------------|---------|
| 1      | 5.548         | VB R | 0.2162      | 9727.44336   | 678.94696    | 99.0342 |
| 2      | 7.944         | MM   | 0.2569      | 94.86842     | 6.15471      | 0.9658  |

Totals :                    9822.31178   685.10167

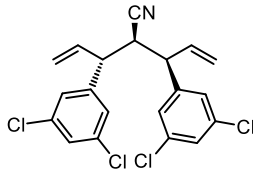

13

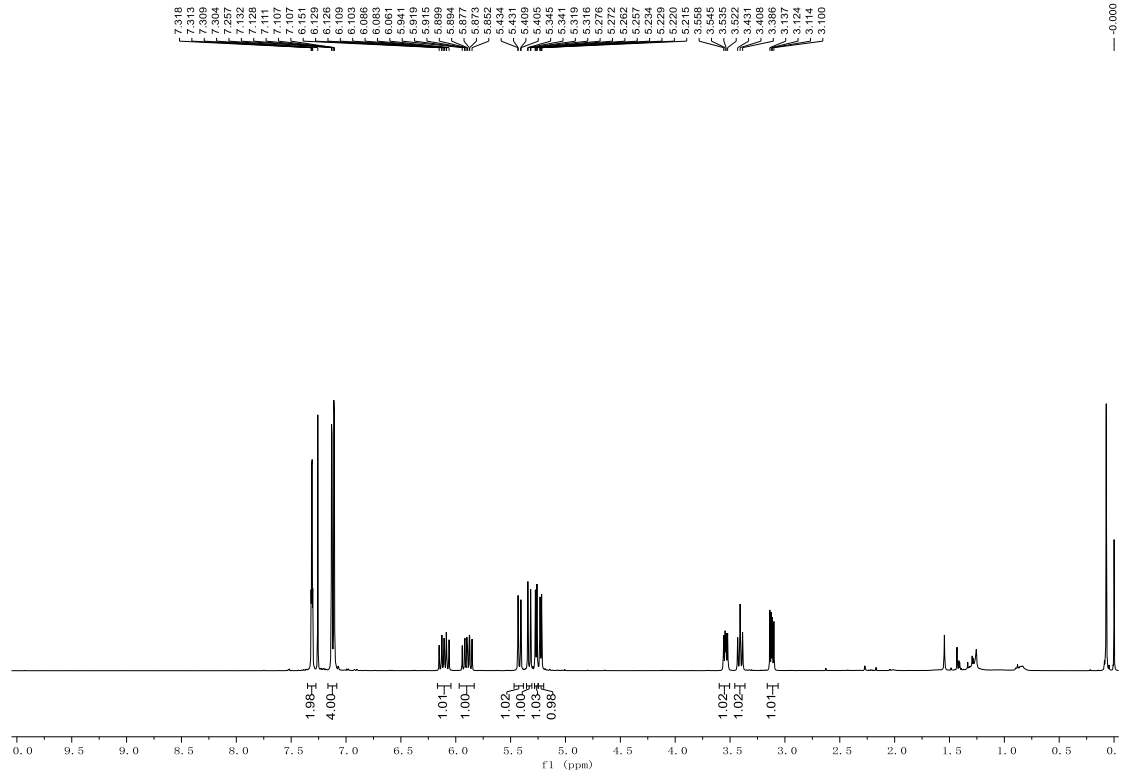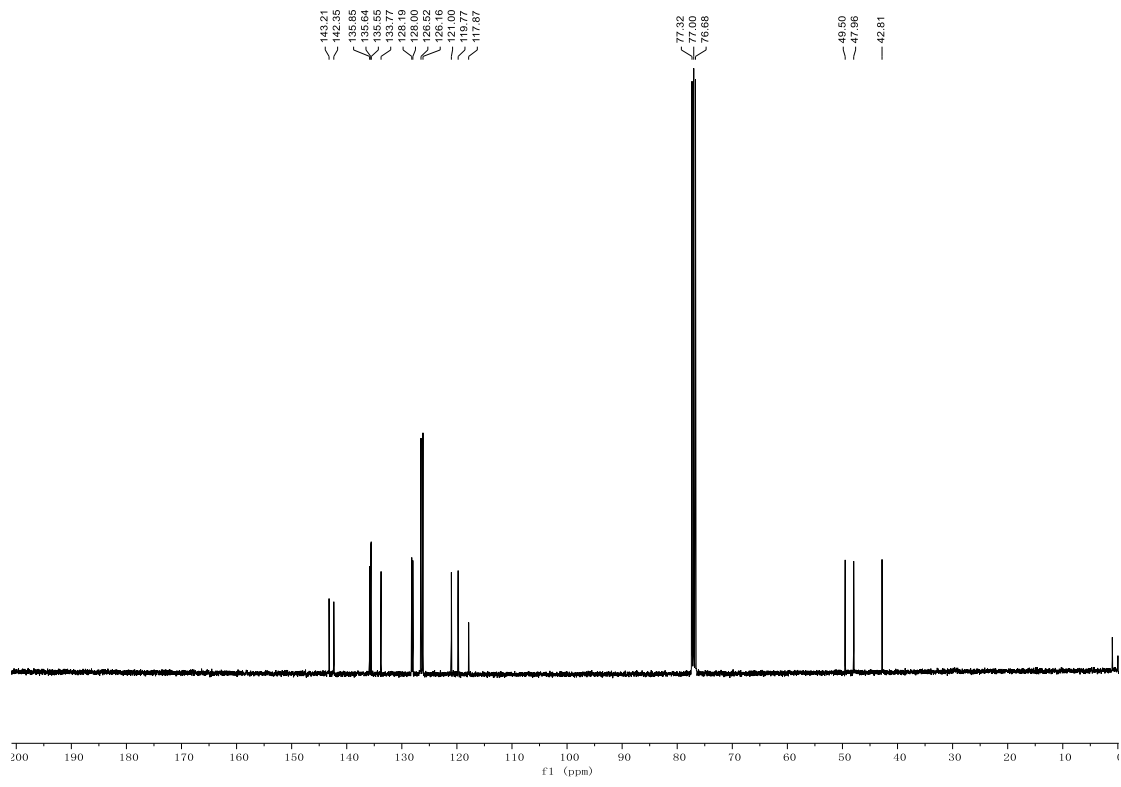

```

=====
Acq. Operator   : SYSTEM                      Seq. Line :    1
Acq. Instrument : 1260                        Location  :   81
Injection Date  : 1/7/2021 4:38:09 PM        Inj       :    1
                                           Inj Volume: 5.000 µl
Acq. Method     : E:\DATA\SC\SC-15-77-87\SC-15-77-87-RAC 2021-01-07 16-36-46\SC-4-IE-95-5-DAD
                  -1ML-30MIN.M
Last changed    : 1/7/2021 4:45:42 PM by SYSTEM
                  (modified after loading)
Analysis Method : E:\DATA\SC\SC-15-77-87\SC-15-77-87-RAC 2021-01-07 16-36-46\SC-4-IE-95-5-DAD
                  -1ML-30MIN.M (Sequence Method)
Last changed    : 4/7/2021 6:11:38 PM by SYSTEM
                  (modified after loading)
Additional Info : Peak(s) manually integrated
  
```

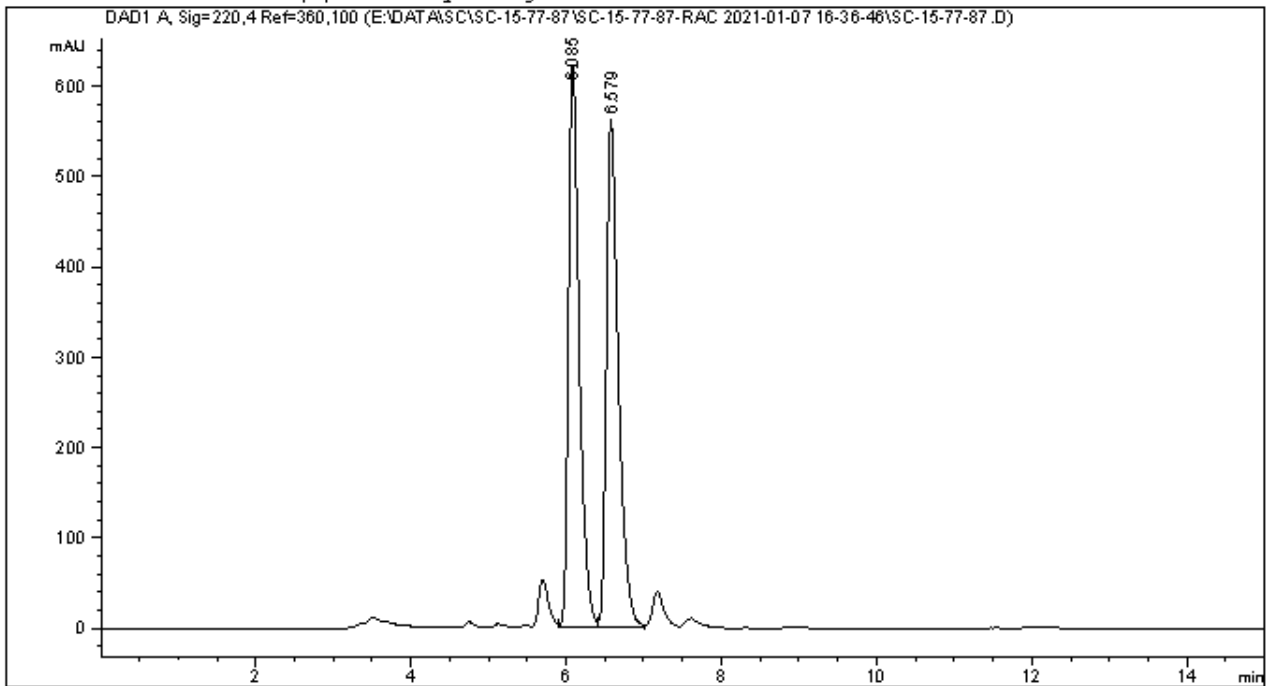

=====  
 Area Percent Report  
 =====

```

Sorted By      :      Signal
Multiplier     :      1.0000
Dilution       :      1.0000
Do not use Multiplier & Dilution Factor with ISTDs
  
```

Signal 1: DAD1 A, Sig=220,4 Ref=360,100

| Peak # | RetTime [min] | Type | Width [min] | Area [mAU*s] | Height [mAU] | Area %  |
|--------|---------------|------|-------------|--------------|--------------|---------|
| 1      | 6.085         | VV   | 0.1459      | 6015.66504   | 621.84479    | 50.1198 |
| 2      | 6.579         | VV   | 0.1603      | 5986.90430   | 561.77594    | 49.8802 |

Totals :                    1.20026e4  1183.62073

Data File E:\DATA\SC\SC-15-77-87\SC-15-77-87 2021-01-07 15-14-05\SC-15-77-871.D  
 Sample Name: SC-15-87

```

=====
Acq. Operator   : SYSTEM                      Seq. Line :    2
Acq. Instrument : 1260                       Location  :   83
Injection Date  : 1/7/2021 3:31:50 PM        Inj       :    1
                                           Inj Volume: 5.000 µl
Acq. Method    : E:\DATA\SC\SC-15-77-87\SC-15-77-87 2021-01-07 15-14-05\SC-4-IE-95-5-DAD-1ML
                : -30MIN.M
Last changed   : 1/7/2021 3:19:09 PM by SYSTEM
Analysis Method: E:\DATA\SC\SC-15-77-87\SC-15-77-87 2021-01-07 15-14-05\SC-4-IE-95-5-DAD-1ML
                : -30MIN.M (Sequence Method)
Last changed   : 4/7/2021 6:13:23 PM by SYSTEM
                : (modified after loading)
Additional Info : Peak(s) manually integrated
  
```

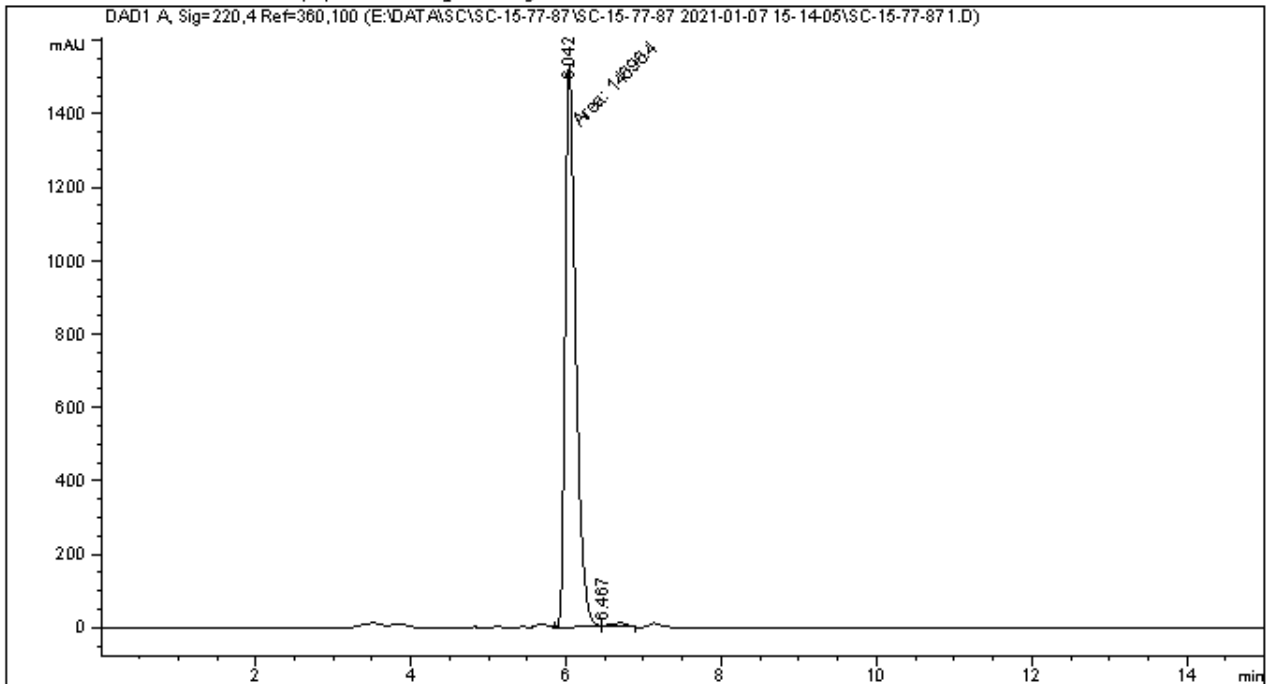

=====  
 Area Percent Report  
 =====

```

Sorted By      :      Signal
Multiplier     :      1.0000
Dilution       :      1.0000
Do not use Multiplier & Dilution Factor with ISTDs
  
```

Signal 1: DAD1 A, Sig=220,4 Ref=360,100

| Peak # | RetTime [min] | Type | Width [min] | Area [mAU*s] | Height [mAU] | Area %  |
|--------|---------------|------|-------------|--------------|--------------|---------|
| 1      | 6.042         | MF   | 0.1596      | 1.46964e4    | 1534.73291   | 98.9340 |
| 2      | 6.467         | FM R | 0.1436      | 158.35353    | 2.72323      | 1.0660  |

Totals :                    1.48548e4  1537.45614

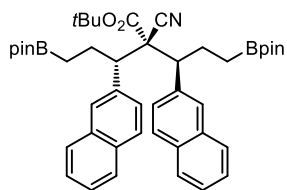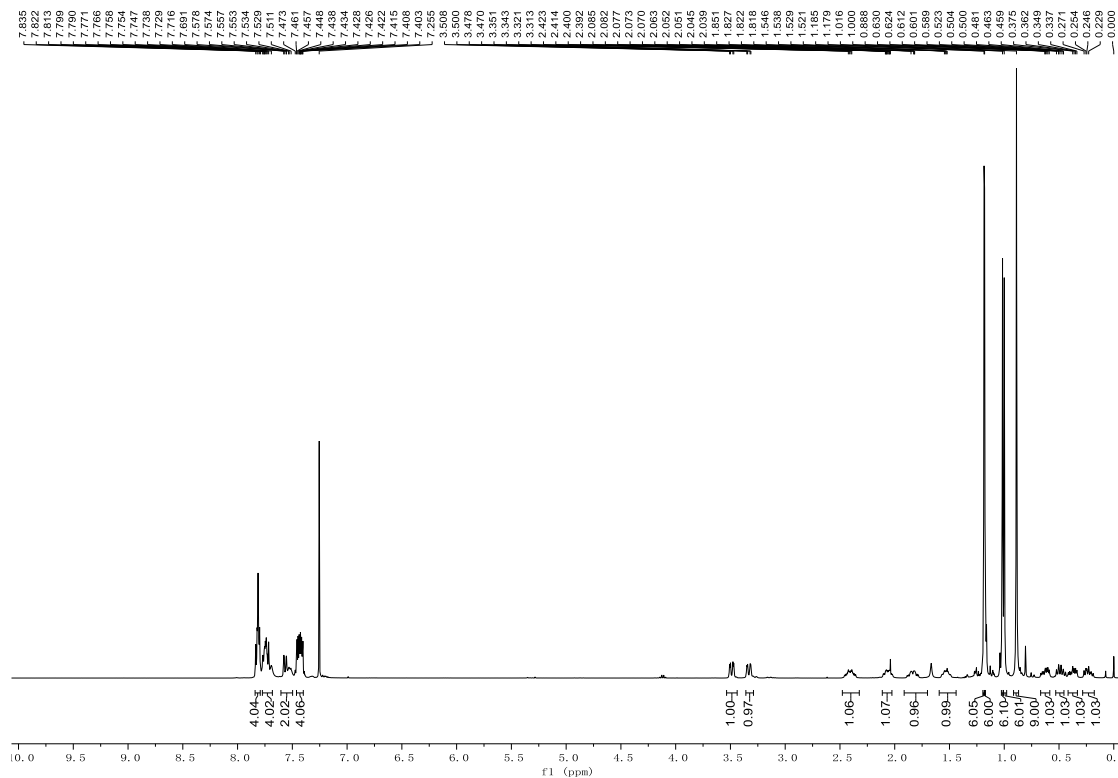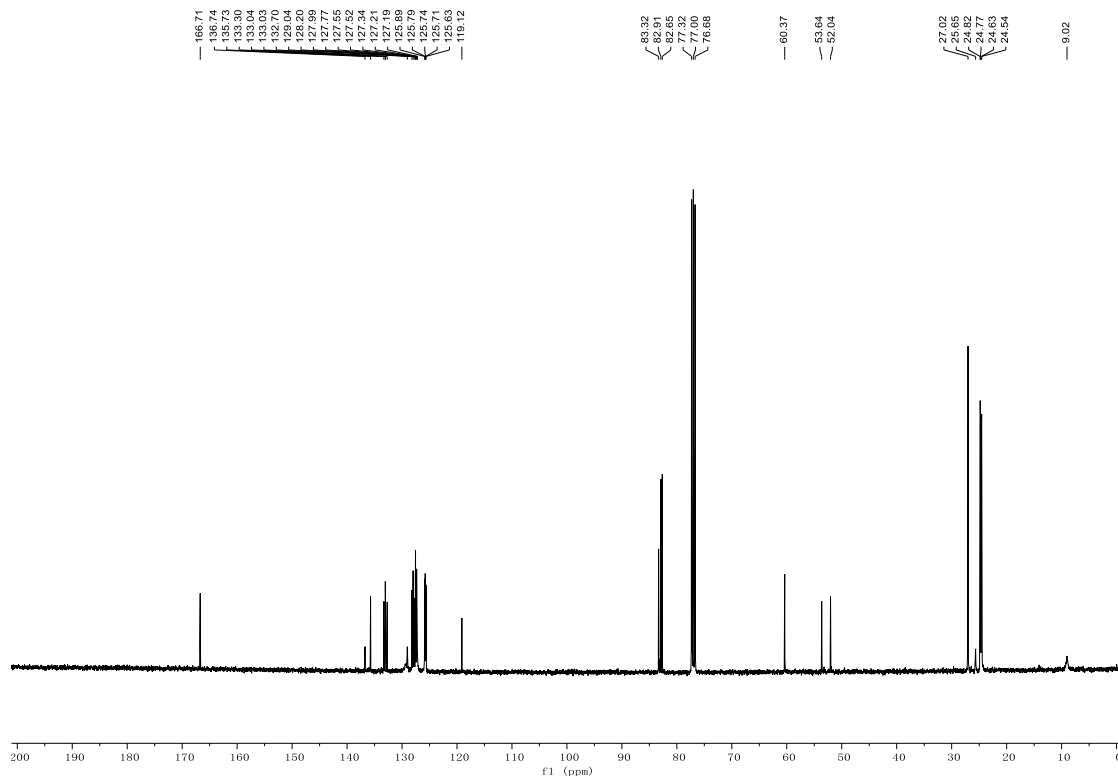

```

=====
Acq. Operator   : SYSTEM                      Seq. Line :    1
Acq. Instrument : 1260                       Location  :   81
Injection Date  : 3/12/2021 8:38:43 PM      Inj       :    1
                                           Inj Volume: 5.000 µl
Acq. Method    : E:\DATA\SC\SC-15-131-134\SC-15-131-134-RAC-1 2021-03-12 20-37-22\SC-4-IE-95
                : -5-DAD-1ML-30MIN.M
Last changed   : 3/12/2021 8:37:22 PM by SYSTEM
Analysis Method : E:\DATA\SC\SC-15-131-134\SC-15-131-134-RAC-1 2021-03-12 20-37-22\SC-4-IE-95
                : -5-DAD-1ML-30MIN.M (Sequence Method)
Last changed   : 4/7/2021 6:16:12 PM by SYSTEM
                : (modified after loading)
Additional Info : Peak(s) manually integrated
  
```

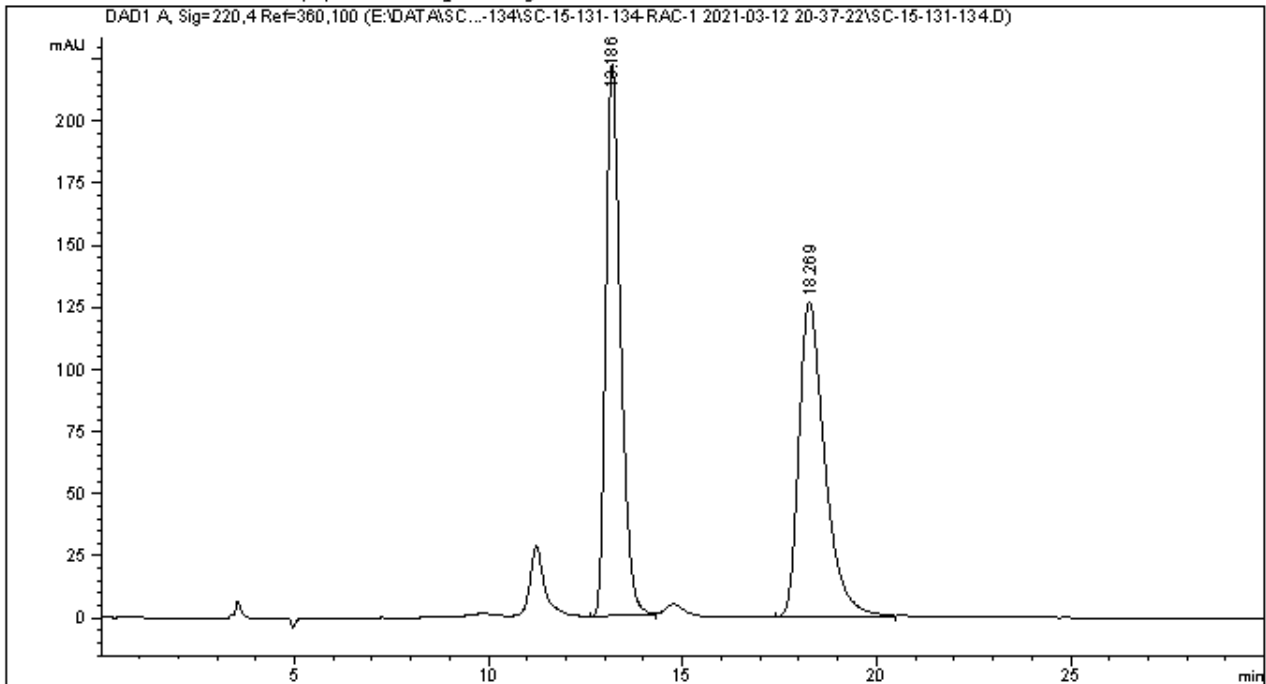

=====  
 Area Percent Report  
 =====

```

Sorted By      :      Signal
Multiplier     :      1.0000
Dilution       :      1.0000
Do not use Multiplier & Dilution Factor with ISTDs
  
```

Signal 1: DAD1 A, Sig=220,4 Ref=360,100

| Peak # | RetTime [min] | Type | Width [min] | Area [mAU*s] | Height [mAU] | Area %  |
|--------|---------------|------|-------------|--------------|--------------|---------|
| 1      | 13.186        | BB   | 0.4028      | 5895.11279   | 221.96712    | 50.1374 |
| 2      | 18.269        | BB   | 0.6893      | 5862.80615   | 126.82327    | 49.8626 |

Totals :                    1.17579e4    348.79038

Data File E:\DATA\SC\SC-15-131-134\SC-15-131-134 2021-03-12 17-46-22\SC-15-131-1341.D  
 Sample Name: SC-15-134

```

=====
Acq. Operator   : SYSTEM                      Seq. Line :    2
Acq. Instrument : 1260                        Location  :   83
Injection Date  : 3/12/2021 6:14:03 PM       Inj       :    1
                                           Inj Volume: 5.000 µl
Acq. Method     : E:\DATA\SC\SC-15-131-134\SC-15-131-134 2021-03-12 17-46-22\SC-4-IE-95-5-DAD
                  -1ML-30MIN.M
Last changed    : 3/12/2021 5:48:10 PM by SYSTEM
Analysis Method : E:\DATA\SC\SC-15-131-134\SC-15-131-134 2021-03-12 17-46-22\SC-4-IE-95-5-DAD
                  -1ML-30MIN.M (Sequence Method)
Last changed    : 4/7/2021 6:17:13 PM by SYSTEM
                  (modified after loading)
Additional Info : Peak(s) manually integrated
  
```

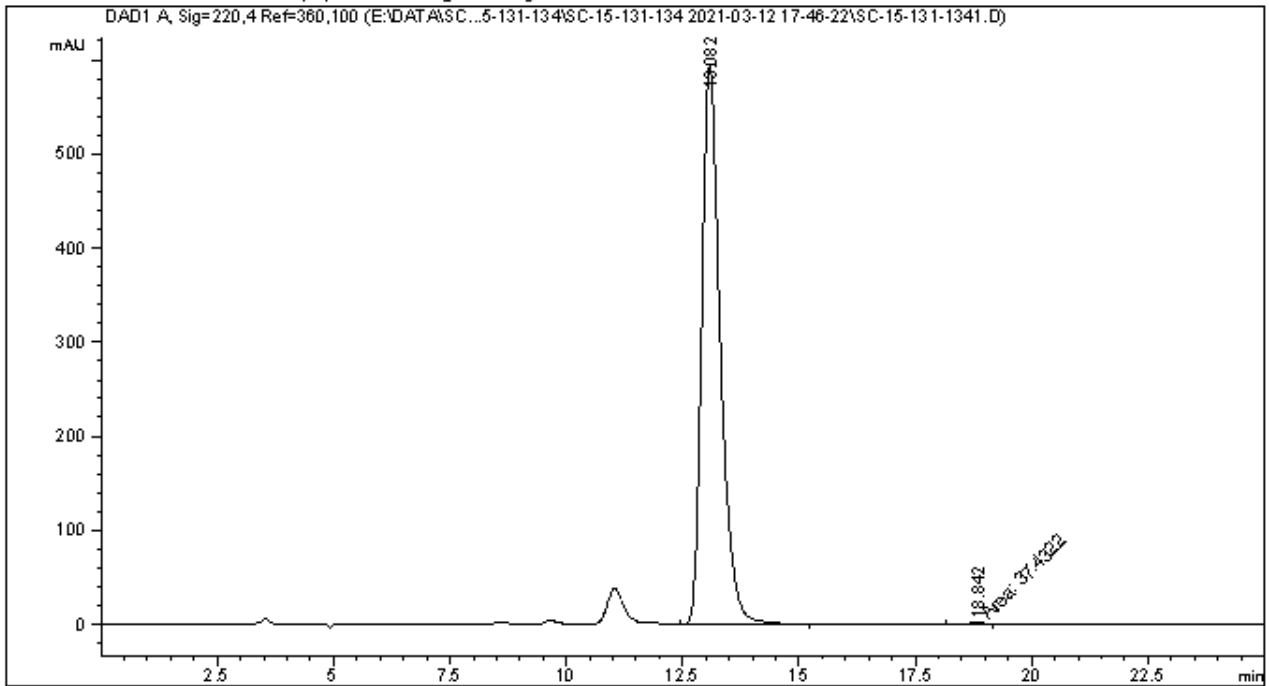

=====  
 Area Percent Report  
 =====

```

Sorted By      :      Signal
Multiplier     :      1.0000
Dilution       :      1.0000
Do not use Multiplier & Dilution Factor with ISTDs
  
```

Signal 1: DAD1 A, Sig=220,4 Ref=360,100

| Peak # | RetTime [min] | Type | Width [min] | Area [mAU*s] | Height [mAU] | Area %  |
|--------|---------------|------|-------------|--------------|--------------|---------|
| 1      | 13.082        | BB   | 0.4177      | 1.64576e4    | 595.02911    | 99.7731 |
| 2      | 18.842        | MM   | 0.5628      | 37.43217     | 1.10849      | 0.2269  |

Totals :                    1.64951e4    596.13760



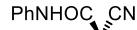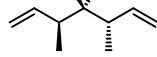

16

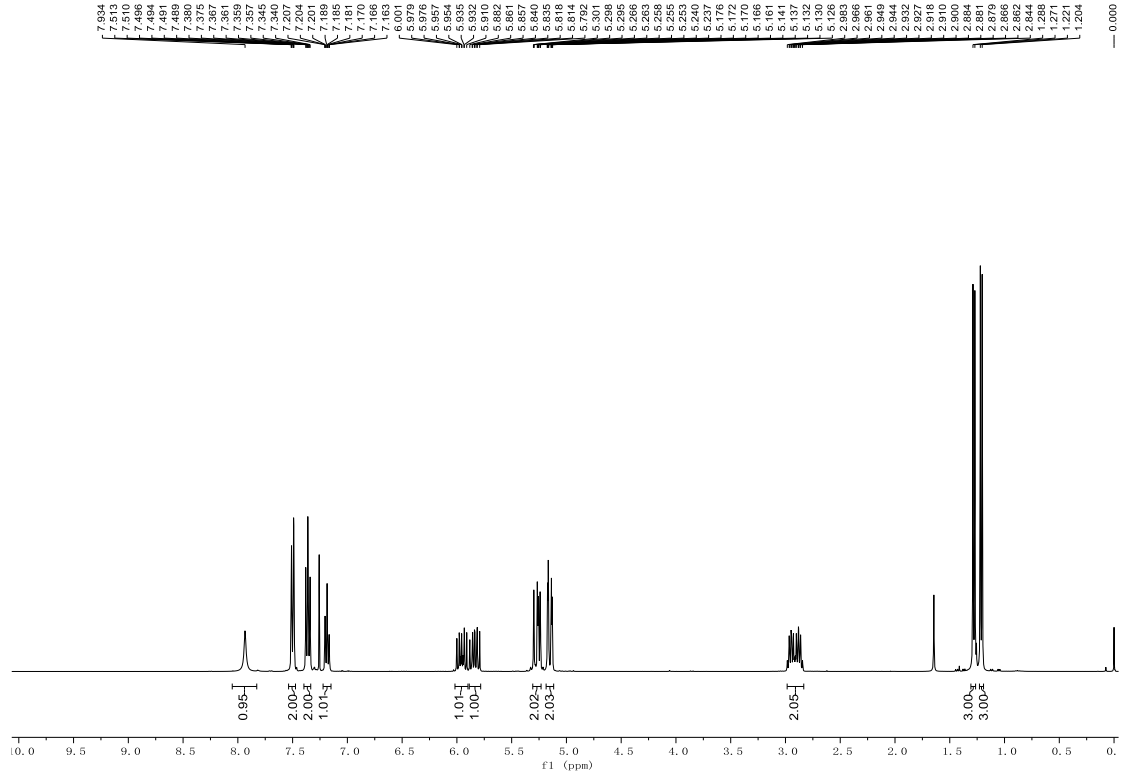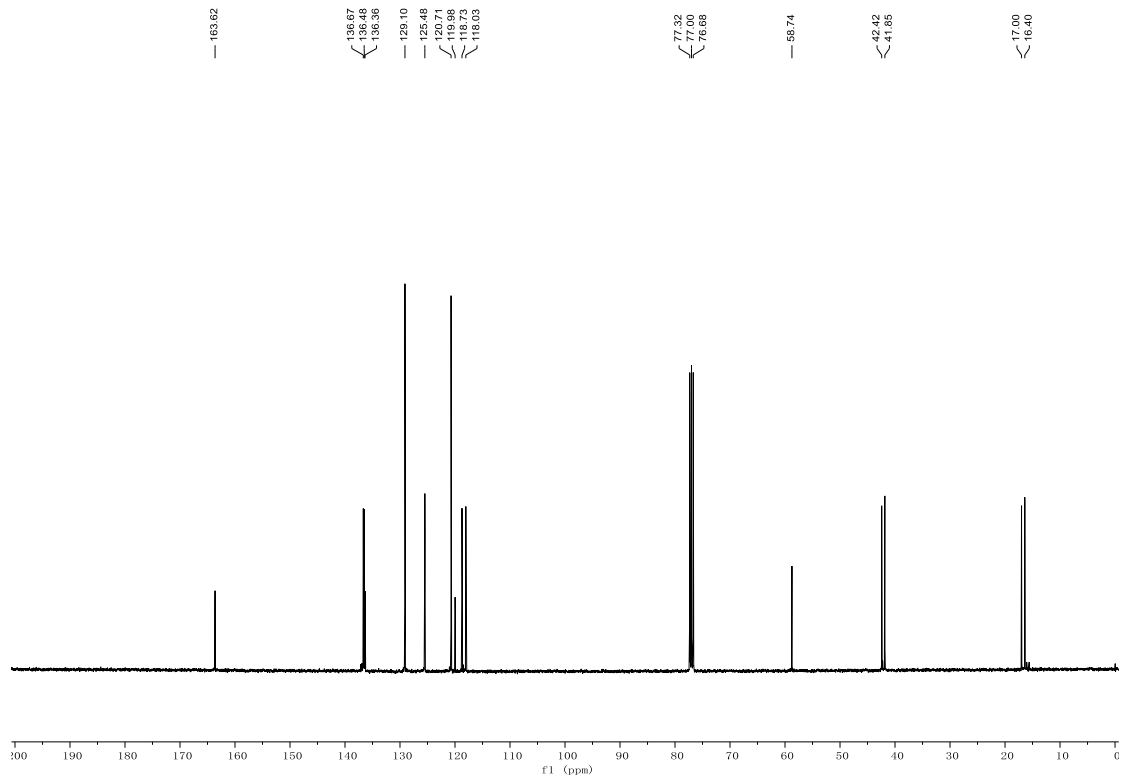

```

=====
Acq. Operator   : SYSTEM                      Seq. Line :    1
Acq. Instrument : 1260                        Location  :   82
Injection Date  : 5/13/2021 10:53:58 AM      Inj       :    1
                                           Inj Volume: 5.000 µl
Acq. Method     : E:\DATA\SC\SC-16-33\SC-16-33-RAC 2021-05-13 10-52-29\SC-5-0JH-98-2-DAD-1ML-20MIN.M
Last changed    : 5/13/2021 10:52:29 AM by SYSTEM
Analysis Method : E:\DATA\SC\SC-16-33\SC-16-33-RAC 2021-05-13 10-52-29\SC-5-0JH-98-2-DAD-1ML-20MIN.M (Sequence Method)
Last changed    : 5/13/2021 11:11:41 AM by SYSTEM
                 (modified after loading)
Additional Info : Peak(s) manually integrated
  
```



=====  
 Area Percent Report  
 =====

```

Sorted By      :      Signal
Multiplier     :      1.0000
Dilution       :      1.0000
Do not use Multiplier & Dilution Factor with ISTDs
  
```

Signal 1: DAD1, Sig=240,4 Ref=355,90, EXT  
 Signal has been modified after loading from rawdata file!

| Peak # | RetTime [min] | Type | Width [min] | Area [mAU*s] | Height [mAU] | Area %  |
|--------|---------------|------|-------------|--------------|--------------|---------|
| 1      | 8.531         | MF   | 0.3179      | 1.26262e4    | 661.92004    | 49.8663 |
| 2      | 9.895         | FM   | 0.4334      | 1.26939e4    | 488.19965    | 50.1337 |

Totals :                            2.53202e4 1150.11969

```

=====
Acq. Operator   : SYSTEM                      Seq. Line :    3
Acq. Instrument : 1260                       Location  :   84
Injection Date  : 5/13/2021 10:31:08 AM      Inj       :    1
                                           Inj Volume: 5.000 µl
Acq. Method     : E:\DATA\SC\SC-16-33\SC-16-33-RAC-0J-98 2021-05-13 09-47-05\SC-5-0JH-98-2-
                  DAD-1ML-20MIN.M
Last changed    : 5/13/2021 9:47:05 AM by SYSTEM
Analysis Method : E:\DATA\SC\SC-16-33\SC-16-33-RAC-0J-98 2021-05-13 09-47-05\SC-5-0JH-98-2-
                  DAD-1ML-20MIN.M (Sequence Method)
Last changed    : 5/13/2021 11:01:04 AM by SYSTEM
                  (modified after loading)
Additional Info : Peak(s) manually integrated
  
```

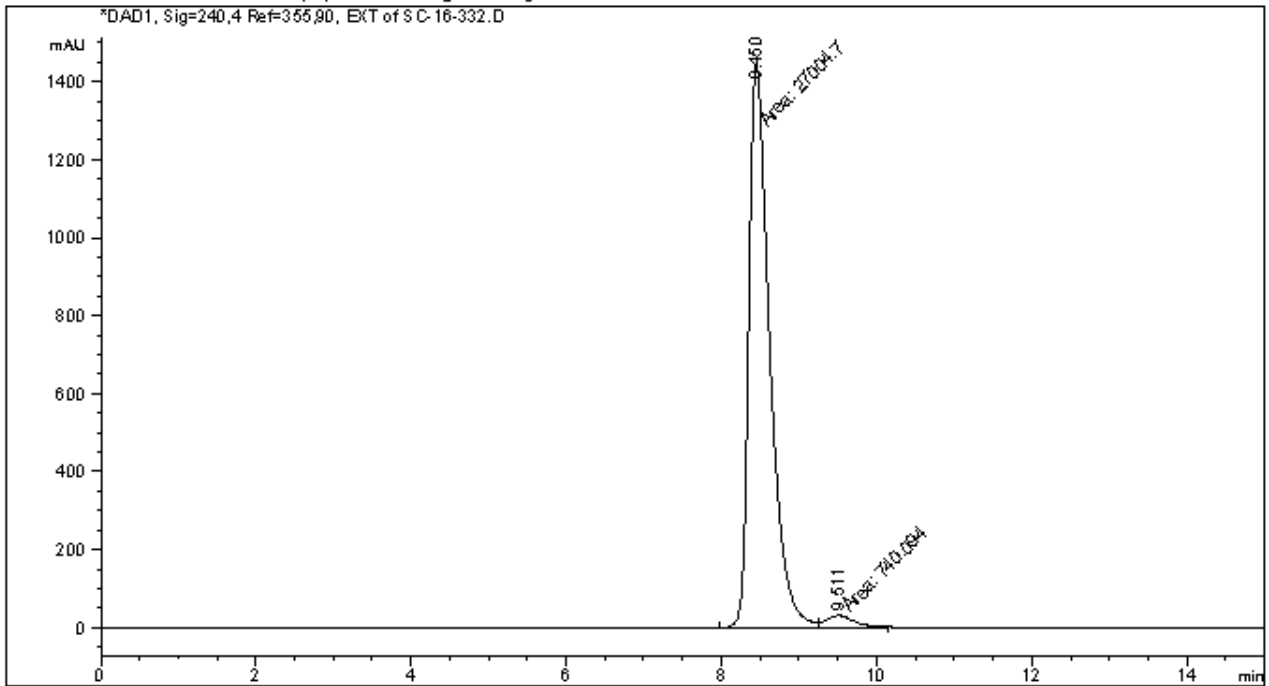

=====  
 Area Percent Report  
 =====

```

Sorted By      :      Signal
Multiplier     :      1.0000
Dilution       :      1.0000
Do not use Multiplier & Dilution Factor with ISTDs
  
```

Signal 1: DAD1, Sig=240,4 Ref=355,90, EXT  
 Signal has been modified after loading from rawdata file!

| Peak # | RetTime [min] | Type | Width [min] | Area [mAU*s] | Height [mAU] | Area %  |
|--------|---------------|------|-------------|--------------|--------------|---------|
| 1      | 8.450         | MF   | 0.3116      | 2.70047e4    | 1444.33252   | 97.3325 |
| 2      | 9.511         | FM   | 0.4116      | 740.09369    | 29.96502     | 2.6675  |

Totals :                      2.77447e4  1474.29754

## XI. X-ray Structures of (*S,S*)-**7j**, (*S,R,S*)-**8A**, *meso*-(*S,s,R*)-**7d**, and (3*S*,4*S*,5*R*)-(*S*)-**12**

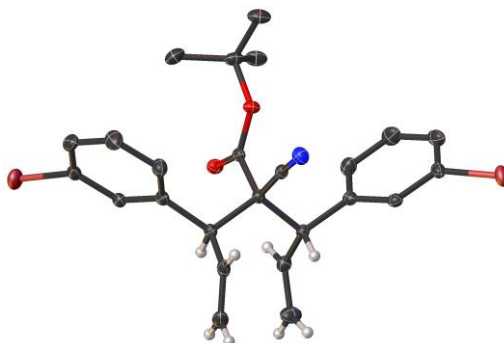

Crystal data for (*S,S*)-**7j**:  $C_{25}H_{25}Br_2NO_2$ ,  $M_r = 531.28$ ,  $T = 296$  K, monoclinic, space group  $P12_11$ ,  $a = 10.68950(10)$ ,  $b = 11.14220(10)$ ,  $c = 10.92190(10)$  Å,  $\beta = 112.4700(10)$  °,  $V = 1202.09(2)$  Å<sup>3</sup>,  $Z = 2$ , 4759 unique reflections, final  $R_1 = 0.0192$  and  $wR_2 = 0.0498$  for 4773 observed [ $I > 2\sigma(I)$ ] reflections, Flack  $\chi = -0.016(6)$ . CCDC 2096475 contains the supplementary crystallographic data for this paper. These data can be obtained free of charge via [www.ccdc.cam.ac.uk/conts/retrieving.html](http://www.ccdc.cam.ac.uk/conts/retrieving.html) (or from the Cambridge Crystallographic Data Centre, 12, Union Road, Cambridge CB21EZ, UK; fax: (+44) 1223-336-033; or [deposit@ccdc.cam.ac.uk](mailto:deposit@ccdc.cam.ac.uk)).

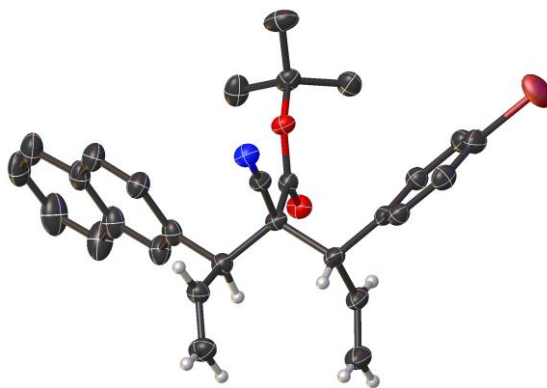

Crystal data for (*S,R,S*)-**8A**:  $C_{29}H_{28}BrNO_2$ ,  $M_r = 502.43$ ,  $T = 296$  K, orthorhombic, space group  $P2_12_12_1$ ,  $a = 7.53030(10)$ ,  $b = 8.69550(10)$ ,  $c = 39.2876(3)$  Å,  $V = 2572.54(5)$  Å<sup>3</sup>,  $Z = 4$ , 5020 unique reflections, final  $R_1 = 0.0279$  and  $wR_2 = 0.0731$  for 5128 observed [ $I > 2\sigma(I)$ ] reflections, Flack  $\chi = -0.026(6)$ . CCDC 2096476 contains the supplementary crystallographic data for this paper. These data can be obtained free of charge via [www.ccdc.cam.ac.uk/conts/retrieving.html](http://www.ccdc.cam.ac.uk/conts/retrieving.html) (or from the Cambridge Crystallographic Data Centre, 12, Union Road, Cambridge CB21EZ, UK; fax: (+44) 1223-336-033; or [deposit@ccdc.cam.ac.uk](mailto:deposit@ccdc.cam.ac.uk)).

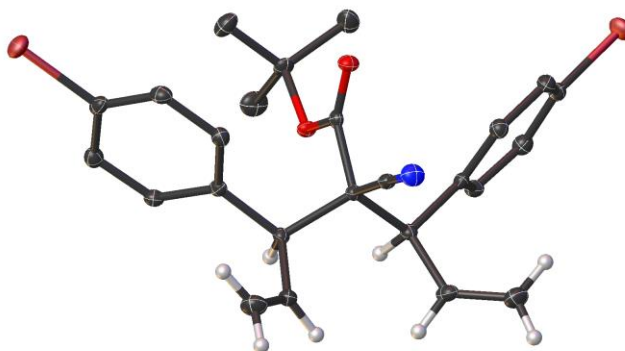

Crystal data for *meso*-(*S,s,R*)-**7d**: C<sub>25</sub>H<sub>25</sub>Br<sub>2</sub>NO<sub>2</sub>,  $M_r = 531.28$ ,  $T = 296$  K, monoclinic, space group  $P2_1/m$ ,  $a = 5.982$ ,  $b = 20.17050(10)$ ,  $c = 9.655$  Å,  $\beta = 104.4620(10)^\circ$ ,  $V = 1128.058(8)$  Å<sup>3</sup>,  $Z = 2$ , 2075 unique reflections, final  $R_1 = 0.0205$  and  $wR_2 = 0.0514$  for 2083 observed [ $I > 2\sigma(I)$ ] reflections, CCDC 2096474 contains the supplementary crystallographic data for this paper. These data can be obtained free of charge via [www.ccdc.cam.ac.uk/conts/retrieving.html](http://www.ccdc.cam.ac.uk/conts/retrieving.html) (or from the Cambridge Crystallographic Data Centre, 12, Union Road, Cambridge CB21EZ, UK; fax: (+44) 1223-336-033; or [deposit@ccdc.cam.ac.uk](mailto:deposit@ccdc.cam.ac.uk)).

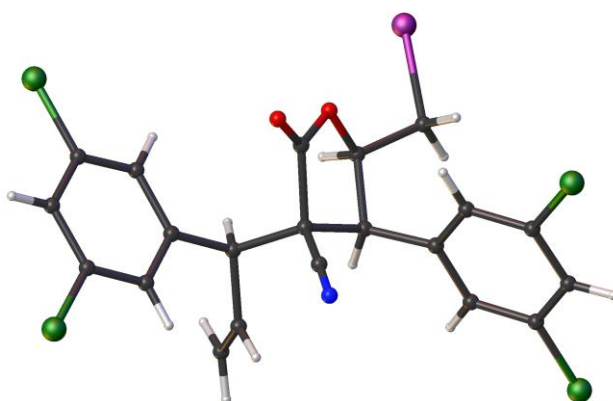

Crystal data for (*3S,4S,5R*)-(*S*)-**12**: C<sub>21</sub>H<sub>14</sub>Cl<sub>4</sub>INO<sub>2</sub>,  $M_r = 581.03$ ,  $T = 296$  K, triclinic, space group  $P1$ ,  $a = 8.2099(3)$ ,  $b = 11.6051(4)$ ,  $c = 12.1577(5)$  Å,  $\alpha = 87.954(3)^\circ$ ,  $\beta = 80.589(3)^\circ$ ,  $\gamma = 89.897(3)^\circ$ ,  $V = 1142.02(7)$  Å<sup>3</sup>,  $Z = 2$ , 6921 unique reflections, final  $R_1 = 0.0738$  and  $wR_2 = 0.2072$  for 7558 observed [ $I > 2\sigma(I)$ ] reflections, Flack  $\chi = 0.001(8)$ . CCDC 2096478 contains the supplementary crystallographic data for this paper. These data can be obtained free of charge via [www.ccdc.cam.ac.uk/conts/retrieving.html](http://www.ccdc.cam.ac.uk/conts/retrieving.html) (or from the Cambridge Crystallographic Data Centre, 12, Union Road, Cambridge CB21EZ, UK; fax: (+44) 1223-336-033; or [deposit@ccdc.cam.ac.uk](mailto:deposit@ccdc.cam.ac.uk)).
